# Supplementary material
Source: publisher figshare collection journal article supplement (https://acs.figshare.com/ndownloader/files/28233407)
Supplement: Supplementary file 1 [file 28233407]

data_hongkm_201104
_audit_creation_date               2020-11-05
_audit_creation_method
;
Olex2 1.3
(compiled 2020.07.31 svn.rc2a77460 for OlexSys, GUI svn.r6145)
;
_shelx_SHELXL_version_number       '2018/3'
_audit_contact_author_address      ?
_audit_contact_author_email        ?
_audit_contact_author_name         ''
_audit_contact_author_phone        ?
_publ_contact_author_id_orcid      ?
_publ_section_references
;
Dolomanov, O.V., Bourhis, L.J., Gildea, R.J, Howard, J.A.K. & Puschmann, H.
 (2009), J. Appl. Cryst. 42, 339-341.

Sheldrick, G.M. (2015). Acta Cryst. A71, 3-8.

Sheldrick, G.M. (2015). Acta Cryst. C71, 3-8.
;
_chemical_name_common              ?
_chemical_name_systematic          ?
_chemical_formula_moiety           'C23 H20 F N O3'
_chemical_formula_sum              'C23 H20 F N O3'
_chemical_formula_weight           377.40
_chemical_melting_point            ?
loop_
  _atom_type_symbol
  _atom_type_description
  _atom_type_scat_dispersion_real
  _atom_type_scat_dispersion_imag
  _atom_type_scat_source
 'C' 'C' 0.0181 0.0091 'International Tables Vol C Tables 4.2.6.8 and 6.1.1.4'
 'H' 'H' 0.0000 0.0000 'International Tables Vol C Tables 4.2.6.8 and 6.1.1.4'
 'F' 'F' 0.0727 0.0534 'International Tables Vol C Tables 4.2.6.8 and 6.1.1.4'
 'N' 'N' 0.0311 0.0180 'International Tables Vol C Tables 4.2.6.8 and 6.1.1.4'
 'O' 'O' 0.0492 0.0322 'International Tables Vol C Tables 4.2.6.8 and 6.1.1.4'

_shelx_space_group_comment
;
The symmetry employed for this shelxl refinement is uniquely defined
by the following loop, which should always be used as a source of
symmetry information in preference to the above space-group names.
They are only intended as comments.
;
_space_group_crystal_system        'monoclinic'
_space_group_IT_number             14
_space_group_name_H-M_alt          'P 1 21/n 1'
_space_group_name_Hall             '-P 2yn'
loop_
  _space_group_symop_operation_xyz
 'x, y, z'
 '-x+1/2, y+1/2, -z+1/2'
 '-x, -y, -z'
 'x-1/2, -y-1/2, z-1/2'

_cell_length_a                     6.27360(10)
_cell_length_b                     17.5212(2)
_cell_length_c                     17.2761(2)
_cell_angle_alpha                  90
_cell_angle_beta                   94.9400(10)
_cell_angle_gamma                  90
_cell_volume                       1891.95(4)
_cell_formula_units_Z              4
_cell_measurement_reflns_used      16507
_cell_measurement_temperature      99.99(10)
_cell_measurement_theta_max        76.3880
_cell_measurement_theta_min        2.4990
_shelx_estimated_absorpt_T_max     0.893
_shelx_estimated_absorpt_T_min     0.801
_exptl_absorpt_coefficient_mu      0.775
_exptl_absorpt_correction_T_max    1.00000
_exptl_absorpt_correction_T_min    0.43119
_exptl_absorpt_correction_type     multi-scan
_exptl_absorpt_process_details
;
CrysAlisPro 1.171.40.54a (Rigaku Oxford Diffraction, 2019)
Empirical absorption correction using spherical harmonics,
 implemented in SCALE3 ABSPACK scaling algorithm.
;
_exptl_absorpt_special_details     ?
_exptl_crystal_colour              colourless
_exptl_crystal_colour_primary      colourless
_exptl_crystal_density_diffrn      1.325
_exptl_crystal_density_meas        ?
_exptl_crystal_density_method      ?
_exptl_crystal_description         block
_exptl_crystal_F_000               792
_exptl_crystal_size_max            0.3
_exptl_crystal_size_mid            0.15
_exptl_crystal_size_min            0.15
_exptl_transmission_factor_max     ?
_exptl_transmission_factor_min     ?
_diffrn_reflns_av_R_equivalents    0.0770
_diffrn_reflns_av_unetI/netI       0.0362
_diffrn_reflns_Laue_measured_fraction_full  1.000
_diffrn_reflns_Laue_measured_fraction_max  0.988
_diffrn_reflns_limit_h_max         7
_diffrn_reflns_limit_h_min         -6
_diffrn_reflns_limit_k_max         21
_diffrn_reflns_limit_k_min         -22
_diffrn_reflns_limit_l_max         21
_diffrn_reflns_limit_l_min         -21
_diffrn_reflns_number              37823
_diffrn_reflns_point_group_measured_fraction_full  1.000
_diffrn_reflns_point_group_measured_fraction_max  0.988
_diffrn_reflns_theta_full          67.684
_diffrn_reflns_theta_max           76.967
_diffrn_reflns_theta_min           3.600
_diffrn_ambient_environment        N~2~
_diffrn_ambient_temperature        99.99(10)
_diffrn_detector                   'CCD plate'
_diffrn_detector_area_resol_mean   10.0000
_diffrn_detector_type              HyPix
_diffrn_measured_fraction_theta_full  1.000
_diffrn_measured_fraction_theta_max  0.988
_diffrn_measurement_details
;
List of Runs (angles in degrees, time in seconds):

  # Type    Start    End  Width  t~exp~   \w     \q     \k     \f   Frames
--------------------------------------------------------------------------
  1  \w   -119.00 -57.00   0.50    0.05    --  -46.62-146.00 124.00  124
  2  \w   -119.00 -71.00   0.50    0.05    --  -46.62-125.00 -68.00   96
  3  \w   -107.00 -22.00   0.50    0.05    --  -46.62 146.00 176.00  170
  4  \w    -95.00 -11.00   0.50    0.05    --  -46.62 125.00   9.00  168
  5  \w     15.00  95.00   0.50    0.05    --   46.62-125.00 -68.00  160
  6  \w     26.00 108.00   0.50    0.05    --   46.62-146.00 124.00  164
  7  \w     61.00 120.00   0.50    0.05    --   46.62 146.00 176.00  118
  8  \w   -131.00 -27.00   0.50    0.10    -- -100.00 146.00 176.00  208
  9  \w   -117.00 -27.00   0.50    0.10    -- -100.00 125.00   9.00  180
 10  \w     34.00 131.00   0.50    0.10    --  107.00-146.00 124.00  194
 11  \w     76.00 178.00   0.50    0.10    --  107.00 125.00   9.00  204
 12  \w     34.00 117.00   0.50    0.10    --  107.00-125.00 -68.00  166
 13  \w     61.00 174.00   0.50    0.10    --  107.00 146.00 176.00  226
 14  \w   -119.00 -71.00   0.50    0.05    --  -46.62-125.00 -30.00   96
 15  \w     23.00 120.00   0.50    0.05    --   46.62  77.00  90.00  194
 16  \w     31.00 120.00   0.50    0.05    --   46.62  57.00 -60.00  178
 17  \w     32.00 120.00   0.50    0.05    --   46.62  38.00  60.00  176
 18  \w   -114.00 -27.00   0.50    0.10    -- -100.00  45.00  60.00  174
 19  \w   -175.00 -84.00   0.50    0.10    -- -100.00 -30.00-180.00  182
 20  \w   -173.00 -81.00   0.50    0.10    -- -100.00 -94.00  60.00  184
 21  \w   -173.00 -71.00   0.50    0.10    -- -100.00-125.00 -68.00  204
 22  \w   -115.00 -44.00   0.50    0.10    -- -100.00  30.00  60.00  142
 23  \w     76.00 102.00   0.50    0.10    --  107.00 -94.00-180.00   52
 24  \w     34.00  88.00   0.50    0.10    --  107.00-125.00  90.00  108
 25  \w     36.00  75.00   0.50    0.10    --  107.00-125.00  30.00   78
 26  \w    115.00 177.00   0.50    0.10    --  107.00  61.00   0.00  124
 27  \w     51.00  92.00   0.50    0.10    --  107.00-125.00 -30.00   82
 28  \w     93.00 119.00   0.50    0.10    --  107.00 -45.00  60.00   52
 29  \w    116.00 178.00   0.50    0.10    --  107.00 125.00  60.00  124
 30  \w     46.00  97.00   0.50    0.10    --  107.00-125.00-120.00  102
 31  \w     90.00 176.00   0.50    0.10    --  107.00  15.00 120.00  172
 32  \w     82.00 108.00   0.50    0.10    --  107.00 125.00  60.00   52
 33  \w     59.00  85.00   0.50    0.10    --  107.00 -77.00   0.00   52
 34  \w    104.00 130.00   0.50    0.10    --  107.00 -77.00   0.00   52
 35  \w     91.00 152.00   0.50    0.10    --  107.00  61.00 -90.00  122
 36  \w     94.00 171.00   0.50    0.10    --  107.00  45.00-120.00  154
 37  \w     47.00 108.00   0.50    0.10    --  107.00 -94.00 150.00  122
 38  \w     92.00 171.00   0.50    0.10    --  107.00  30.00 -30.00  158
 39  \w     43.00 106.00   0.50    0.10    --  107.00 -94.00 120.00  126
 40  \w     41.00 109.00   0.50    0.10    --  107.00 -94.00 -30.00  136
 41  \w     35.00  84.00   0.50    0.10    --  107.00 -45.00  60.00   98
;
_diffrn_measurement_device         'four-circle diffractometer'
_diffrn_measurement_device_type    'XtaLAB Synergy R, DW system, HyPix'
_diffrn_measurement_method         '\w scans'
_diffrn_orient_matrix_type        
 'CrysAlisPro convention (1999,Acta A55,543-557)'
_diffrn_orient_matrix_UB_11        -0.0058777000
_diffrn_orient_matrix_UB_12        0.0763396000
_diffrn_orient_matrix_UB_13        0.0440330000
_diffrn_orient_matrix_UB_21        -0.0434273000
_diffrn_orient_matrix_UB_22        -0.0432270000
_diffrn_orient_matrix_UB_23        0.0746792000
_diffrn_orient_matrix_UB_31        0.2425918000
_diffrn_orient_matrix_UB_32        -0.0058789000
_diffrn_orient_matrix_UB_33        0.0221679000
_diffrn_radiation_monochromator    mirror
_diffrn_radiation_probe            x-ray
_diffrn_radiation_type             'Cu K\a'
_diffrn_radiation_wavelength       1.54184
_diffrn_source                     'Rotating-anode X-ray tube'
_diffrn_source_type                'Rigaku (Cu) X-ray Source'
_reflns_Friedel_coverage           0.000
_reflns_Friedel_fraction_full      .
_reflns_Friedel_fraction_max       .
_reflns_number_gt                  3345
_reflns_number_total               3940
_reflns_odcompleteness_completeness  99.97
_reflns_odcompleteness_iscentric   1
_reflns_odcompleteness_theta       71.98
_reflns_special_details
;
 Reflections were merged by SHELXL according to the crystal
 class for the calculation of statistics and refinement.
 
 _reflns_Friedel_fraction is defined as the number of unique
 Friedel pairs measured divided by the number that would be
 possible theoretically, ignoring centric projections and
 systematic absences.
;
_reflns_threshold_expression       'I > 2\s(I)'
_computing_cell_refinement         'CrysAlisPro 1.171.40.54a (Rigaku OD, 2019)'
_computing_data_collection         'CrysAlisPro 1.171.40.54a (Rigaku OD, 2019)'
_computing_data_reduction          'CrysAlisPro 1.171.40.54a (Rigaku OD, 2019)'
_computing_molecular_graphics      'Olex2 1.3 (Dolomanov et al., 2009)'
_computing_publication_material    'Olex2 1.3 (Dolomanov et al., 2009)'
_computing_structure_refinement    'SHELXL 2018/3 (Sheldrick, 2015)'
_computing_structure_solution      'SHELXT 2018/2 (Sheldrick, 2018)'
_refine_diff_density_max           0.410
_refine_diff_density_min           -0.506
_refine_diff_density_rms           0.066
_refine_ls_extinction_coef         .
_refine_ls_extinction_method       none
_refine_ls_goodness_of_fit_ref     1.047
_refine_ls_hydrogen_treatment      constr
_refine_ls_matrix_type             full
_refine_ls_number_parameters       254
_refine_ls_number_reflns           3940
_refine_ls_number_restraints       0
_refine_ls_R_factor_all            0.0648
_refine_ls_R_factor_gt             0.0578
_refine_ls_restrained_S_all        1.047
_refine_ls_shift/su_max            0.000
_refine_ls_shift/su_mean           0.000
_refine_ls_structure_factor_coef   Fsqd
_refine_ls_weighting_details      
 'w=1/[\s^2^(Fo^2^)+(0.1173P)^2^+0.4577P] where P=(Fo^2^+2Fc^2^)/3'
_refine_ls_weighting_scheme        calc
_refine_ls_wR_factor_gt            0.1630
_refine_ls_wR_factor_ref           0.1731
_refine_special_details            ?
_olex2_refinement_description
;
1. Fixed Uiso
 At 1.2 times of:
  All C(H) groups, All C(H,H) groups, All N(H) groups
 At 1.5 times of:
  All C(H,H,H) groups
2.a Ternary CH refined with riding coordinates:
 C10(H10)
2.b Secondary CH2 refined with riding coordinates:
 C2(H2A,H2B)
2.c Aromatic/amide H refined with riding coordinates:
 N11(H11), C7(H7), C23(H23), C22(H22), C4(H4), C13(H13), C17(H17), C19(H19),
 C5(H5), C6(H6), C20(H20), C15(H15), C16(H16), C14(H14)
2.d Idealised Me refined as rotating group:
 C27(H27A,H27B,H27C)
;
_atom_sites_solution_hydrogens     geom
_atom_sites_solution_primary       dual
_atom_sites_solution_secondary     ?
loop_
  _atom_site_label
  _atom_site_type_symbol
  _atom_site_fract_x
  _atom_site_fract_y
  _atom_site_fract_z
  _atom_site_U_iso_or_equiv
  _atom_site_adp_type
  _atom_site_occupancy
  _atom_site_site_symmetry_order
  _atom_site_calc_flag
  _atom_site_refinement_flags_posn
  _atom_site_refinement_flags_adp
  _atom_site_refinement_flags_occupancy
  _atom_site_disorder_assembly
  _atom_site_disorder_group
 O9 O 0.40833(16) 0.86144(6) 0.51330(6) 0.0268(3) Uani 1 1 d . . . . .
 F24 F 0.3819(2) 0.86291(7) 0.88423(6) 0.0501(3) Uani 1 1 d . . . . .
 O26 O 0.09053(18) 0.92438(7) 0.57629(7) 0.0335(3) Uani 1 1 d . . . . .
 O28 O -0.12479(17) 0.82210(7) 0.56046(7) 0.0363(3) Uani 1 1 d . . . . .
 N11 N 0.4820(2) 0.70931(8) 0.55293(8) 0.0297(3) Uani 1 1 d . . . . .
 H11 H 0.561796 0.733016 0.522770 0.036 Uiso 1 1 calc R U . . .
 C10 C 0.2965(2) 0.74703(9) 0.57878(9) 0.0268(3) Uani 1 1 d . . . . .
 H10 H 0.180371 0.709467 0.575963 0.032 Uiso 1 1 calc R U . . .
 C8 C 0.4133(2) 0.87903(9) 0.43593(9) 0.0275(3) Uani 1 1 d . . . . .
 C25 C 0.0445(2) 0.85368(9) 0.55370(9) 0.0278(3) Uani 1 1 d . . . . .
 C1 C 0.2279(2) 0.81151(9) 0.52018(9) 0.0267(3) Uani 1 1 d . . . . .
 C18 C 0.3231(2) 0.77612(9) 0.66190(9) 0.0274(3) Uani 1 1 d . . . . .
 C12 C 0.5335(3) 0.63494(9) 0.57619(9) 0.0297(4) Uani 1 1 d . . . . .
 C3 C 0.2677(3) 0.83722(9) 0.38805(9) 0.0303(4) Uani 1 1 d . . . . .
 C7 C 0.5472(3) 0.93329(10) 0.40792(10) 0.0317(4) Uani 1 1 d . . . . .
 H7 H 0.645930 0.959978 0.440826 0.038 Uiso 1 1 calc R U . . .
 C23 C 0.4944(3) 0.82295(10) 0.68674(10) 0.0321(4) Uani 1 1 d . . . . .
 H23 H 0.597205 0.834459 0.652835 0.039 Uiso 1 1 calc R U . . .
 C2 C 0.1583(3) 0.78193(10) 0.43780(10) 0.0320(4) Uani 1 1 d . . . . .
 H2A H 0.207461 0.730125 0.430606 0.038 Uiso 1 1 calc R U . . .
 H2B H 0.004140 0.783831 0.426965 0.038 Uiso 1 1 calc R U . . .
 C22 C 0.5140(3) 0.85273(10) 0.76135(11) 0.0376(4) Uani 1 1 d . . . . .
 H22 H 0.627663 0.884636 0.777593 0.045 Uiso 1 1 calc R U . . .
 C21 C 0.3616(3) 0.83401(11) 0.81088(10) 0.0377(4) Uani 1 1 d . . . . .
 C4 C 0.2476(3) 0.85134(10) 0.30875(10) 0.0364(4) Uani 1 1 d . . . . .
 H4 H 0.148879 0.824458 0.276021 0.044 Uiso 1 1 calc R U . . .
 C13 C 0.7268(3) 0.60351(11) 0.55647(10) 0.0376(4) Uani 1 1 d . . . . .
 H13 H 0.824883 0.634014 0.533418 0.045 Uiso 1 1 calc R U . . .
 C17 C 0.3948(3) 0.58853(10) 0.61487(11) 0.0373(4) Uani 1 1 d . . . . .
 H17 H 0.269826 0.608975 0.631576 0.045 Uiso 1 1 calc R U . . .
 C19 C 0.1729(3) 0.75860(11) 0.71390(10) 0.0358(4) Uani 1 1 d . . . . .
 H19 H 0.057957 0.727186 0.697905 0.043 Uiso 1 1 calc R U . . .
 C5 C 0.3779(3) 0.90645(11) 0.27908(10) 0.0411(4) Uani 1 1 d . . . . .
 H5 H 0.365280 0.916906 0.226110 0.049 Uiso 1 1 calc R U . . .
 C6 C 0.5270(3) 0.94602(11) 0.32803(11) 0.0385(4) Uani 1 1 d . . . . .
 H6 H 0.615084 0.981768 0.306965 0.046 Uiso 1 1 calc R U . . .
 C20 C 0.1911(3) 0.78711(12) 0.78932(11) 0.0419(4) Uani 1 1 d . . . . .
 H20 H 0.091101 0.774830 0.824055 0.050 Uiso 1 1 calc R U . . .
 C15 C 0.6303(4) 0.48088(11) 0.60566(12) 0.0497(5) Uani 1 1 d . . . . .
 H15 H 0.659765 0.429309 0.613565 0.060 Uiso 1 1 calc R U . . .
 C16 C 0.4434(3) 0.51225(11) 0.62828(13) 0.0459(5) Uani 1 1 d . . . . .
 H16 H 0.348652 0.481682 0.652912 0.055 Uiso 1 1 calc R U . . .
 C27 C -0.0722(3) 0.96145(11) 0.61798(13) 0.0437(5) Uani 1 1 d . . . . .
 H27A H -0.209265 0.955562 0.589361 0.066 Uiso 1 1 calc R U . . .
 H27B H -0.039299 1.014758 0.623808 0.066 Uiso 1 1 calc R U . . .
 H27C H -0.075492 0.938521 0.668332 0.066 Uiso 1 1 calc R U . . .
 C14 C 0.7728(4) 0.52736(13) 0.57109(11) 0.0480(5) Uani 1 1 d . . . . .
 H14 H 0.901500 0.507154 0.557472 0.058 Uiso 1 1 calc R U . . .

loop_
  _atom_site_aniso_label
  _atom_site_aniso_U_11
  _atom_site_aniso_U_22
  _atom_site_aniso_U_33
  _atom_site_aniso_U_23
  _atom_site_aniso_U_13
  _atom_site_aniso_U_12
 O9 0.0195(5) 0.0302(6) 0.0301(6) 0.0020(4) -0.0010(4) -0.0048(4)
 F24 0.0706(8) 0.0489(7) 0.0301(6) -0.0025(4) 0.0006(5) 0.0235(6)
 O26 0.0249(6) 0.0288(6) 0.0472(7) -0.0006(5) 0.0056(5) 0.0019(4)
 O28 0.0200(6) 0.0400(7) 0.0486(7) 0.0028(5) 0.0007(5) -0.0026(5)
 N11 0.0236(7) 0.0298(7) 0.0358(7) 0.0005(5) 0.0035(5) 0.0008(5)
 C10 0.0202(7) 0.0255(7) 0.0344(8) 0.0016(6) 0.0008(6) -0.0005(5)
 C8 0.0229(7) 0.0290(8) 0.0304(8) 0.0020(6) 0.0009(6) 0.0048(6)
 C25 0.0200(7) 0.0291(8) 0.0336(8) 0.0049(6) -0.0019(6) 0.0010(5)
 C1 0.0191(7) 0.0278(8) 0.0327(8) 0.0009(6) -0.0008(5) -0.0027(5)
 C18 0.0227(7) 0.0267(7) 0.0326(8) 0.0042(6) 0.0013(6) 0.0034(6)
 C12 0.0276(8) 0.0308(8) 0.0294(8) -0.0049(6) -0.0055(6) 0.0009(6)
 C3 0.0287(8) 0.0285(8) 0.0330(8) -0.0014(6) -0.0020(6) 0.0042(6)
 C7 0.0268(8) 0.0309(8) 0.0376(9) 0.0033(6) 0.0039(6) 0.0024(6)
 C23 0.0278(8) 0.0352(9) 0.0328(8) 0.0034(6) 0.0002(6) -0.0028(6)
 C2 0.0278(8) 0.0321(9) 0.0349(9) -0.0026(6) -0.0047(6) -0.0027(6)
 C22 0.0417(10) 0.0351(9) 0.0347(9) 0.0003(7) -0.0043(7) -0.0010(7)
 C21 0.0473(10) 0.0359(9) 0.0294(8) 0.0015(7) 0.0006(7) 0.0159(7)
 C4 0.0416(10) 0.0338(9) 0.0326(8) -0.0021(7) -0.0039(7) 0.0071(7)
 C13 0.0364(9) 0.0465(10) 0.0290(8) -0.0035(7) -0.0016(6) 0.0109(7)
 C17 0.0311(8) 0.0314(9) 0.0478(10) 0.0017(7) -0.0063(7) -0.0027(7)
 C19 0.0274(8) 0.0416(10) 0.0387(9) 0.0072(7) 0.0054(7) -0.0002(7)
 C5 0.0536(11) 0.0405(10) 0.0293(8) 0.0046(7) 0.0038(7) 0.0122(8)
 C6 0.0394(9) 0.0369(9) 0.0400(9) 0.0085(7) 0.0084(7) 0.0044(7)
 C20 0.0373(9) 0.0517(11) 0.0379(9) 0.0080(8) 0.0106(7) 0.0085(8)
 C15 0.0658(13) 0.0311(9) 0.0472(11) -0.0063(8) -0.0231(10) 0.0123(9)
 C16 0.0457(11) 0.0316(9) 0.0568(12) 0.0032(8) -0.0162(9) -0.0059(8)
 C27 0.0336(9) 0.0361(10) 0.0631(12) -0.0027(8) 0.0141(8) 0.0068(7)
 C14 0.0554(12) 0.0516(12) 0.0345(9) -0.0097(8) -0.0100(8) 0.0247(10)

_geom_special_details
;
 All esds (except the esd in the dihedral angle between two l.s. planes)
 are estimated using the full covariance matrix.  The cell esds are taken
 into account individually in the estimation of esds in distances, angles
 and torsion angles; correlations between esds in cell parameters are only
 used when they are defined by crystal symmetry.  An approximate (isotropic)
 treatment of cell esds is used for estimating esds involving l.s. planes.
;
loop_
  _geom_bond_atom_site_label_1
  _geom_bond_atom_site_label_2
  _geom_bond_distance
  _geom_bond_site_symmetry_2
  _geom_bond_publ_flag
 O9 C8 1.3746(19) . ?
 O9 C1 1.4434(17) . ?
 F24 C21 1.360(2) . ?
 O26 C25 1.323(2) . ?
 O26 C27 1.452(2) . ?
 O28 C25 1.212(2) . ?
 N11 H11 0.8600 . ?
 N11 C10 1.442(2) . ?
 N11 C12 1.393(2) . ?
 C10 H10 0.9800 . ?
 C10 C1 1.553(2) . ?
 C10 C18 1.519(2) . ?
 C8 C3 1.387(2) . ?
 C8 C7 1.383(2) . ?
 C25 C1 1.523(2) . ?
 C1 C2 1.542(2) . ?
 C18 C23 1.390(2) . ?
 C18 C19 1.391(2) . ?
 C12 C13 1.401(2) . ?
 C12 C17 1.402(3) . ?
 C3 C2 1.500(2) . ?
 C3 C4 1.387(2) . ?
 C7 H7 0.9300 . ?
 C7 C6 1.393(2) . ?
 C23 H23 0.9300 . ?
 C23 C22 1.386(2) . ?
 C2 H2A 0.9700 . ?
 C2 H2B 0.9700 . ?
 C22 H22 0.9300 . ?
 C22 C21 1.377(3) . ?
 C21 C20 1.374(3) . ?
 C4 H4 0.9300 . ?
 C4 C5 1.391(3) . ?
 C13 H13 0.9300 . ?
 C13 C14 1.384(3) . ?
 C17 H17 0.9300 . ?
 C17 C16 1.386(3) . ?
 C19 H19 0.9300 . ?
 C19 C20 1.391(3) . ?
 C5 H5 0.9300 . ?
 C5 C6 1.391(3) . ?
 C6 H6 0.9300 . ?
 C20 H20 0.9300 . ?
 C15 H15 0.9300 . ?
 C15 C16 1.382(3) . ?
 C15 C14 1.383(3) . ?
 C16 H16 0.9300 . ?
 C27 H27A 0.9600 . ?
 C27 H27B 0.9600 . ?
 C27 H27C 0.9600 . ?
 C14 H14 0.9300 . ?

loop_
  _geom_angle_atom_site_label_1
  _geom_angle_atom_site_label_2
  _geom_angle_atom_site_label_3
  _geom_angle
  _geom_angle_site_symmetry_1
  _geom_angle_site_symmetry_3
  _geom_angle_publ_flag
 C8 O9 C1 107.43(11) . . ?
 C25 O26 C27 114.83(13) . . ?
 C10 N11 H11 119.6 . . ?
 C12 N11 H11 119.6 . . ?
 C12 N11 C10 120.83(13) . . ?
 N11 C10 H10 107.0 . . ?
 N11 C10 C1 108.49(13) . . ?
 N11 C10 C18 114.87(12) . . ?
 C1 C10 H10 107.0 . . ?
 C18 C10 H10 107.0 . . ?
 C18 C10 C1 111.96(13) . . ?
 O9 C8 C3 113.11(14) . . ?
 O9 C8 C7 124.03(14) . . ?
 C7 C8 C3 122.86(15) . . ?
 O26 C25 C1 114.40(13) . . ?
 O28 C25 O26 124.75(15) . . ?
 O28 C25 C1 120.81(14) . . ?
 O9 C1 C10 108.63(11) . . ?
 O9 C1 C25 111.15(12) . . ?
 O9 C1 C2 106.82(12) . . ?
 C25 C1 C10 106.32(12) . . ?
 C25 C1 C2 110.53(12) . . ?
 C2 C1 C10 113.44(13) . . ?
 C23 C18 C10 120.60(14) . . ?
 C23 C18 C19 118.65(16) . . ?
 C19 C18 C10 120.71(15) . . ?
 N11 C12 C13 118.80(16) . . ?
 N11 C12 C17 122.82(15) . . ?
 C13 C12 C17 118.29(16) . . ?
 C8 C3 C2 108.03(14) . . ?
 C4 C3 C8 119.59(16) . . ?
 C4 C3 C2 132.38(15) . . ?
 C8 C7 H7 121.6 . . ?
 C8 C7 C6 116.77(16) . . ?
 C6 C7 H7 121.6 . . ?
 C18 C23 H23 119.5 . . ?
 C22 C23 C18 120.92(16) . . ?
 C22 C23 H23 119.5 . . ?
 C1 C2 H2A 111.4 . . ?
 C1 C2 H2B 111.4 . . ?
 C3 C2 C1 101.81(13) . . ?
 C3 C2 H2A 111.4 . . ?
 C3 C2 H2B 111.4 . . ?
 H2A C2 H2B 109.3 . . ?
 C23 C22 H22 120.7 . . ?
 C21 C22 C23 118.51(17) . . ?
 C21 C22 H22 120.7 . . ?
 F24 C21 C22 118.41(18) . . ?
 F24 C21 C20 118.90(17) . . ?
 C20 C21 C22 122.69(17) . . ?
 C3 C4 H4 120.6 . . ?
 C3 C4 C5 118.77(16) . . ?
 C5 C4 H4 120.6 . . ?
 C12 C13 H13 119.8 . . ?
 C14 C13 C12 120.41(19) . . ?
 C14 C13 H13 119.8 . . ?
 C12 C17 H17 119.9 . . ?
 C16 C17 C12 120.15(18) . . ?
 C16 C17 H17 119.9 . . ?
 C18 C19 H19 119.3 . . ?
 C20 C19 C18 121.34(17) . . ?
 C20 C19 H19 119.3 . . ?
 C4 C5 H5 119.7 . . ?
 C6 C5 C4 120.51(16) . . ?
 C6 C5 H5 119.7 . . ?
 C7 C6 H6 119.3 . . ?
 C5 C6 C7 121.45(17) . . ?
 C5 C6 H6 119.3 . . ?
 C21 C20 C19 117.89(17) . . ?
 C21 C20 H20 121.1 . . ?
 C19 C20 H20 121.1 . . ?
 C16 C15 H15 120.5 . . ?
 C16 C15 C14 118.95(18) . . ?
 C14 C15 H15 120.5 . . ?
 C17 C16 H16 119.5 . . ?
 C15 C16 C17 121.1(2) . . ?
 C15 C16 H16 119.5 . . ?
 O26 C27 H27A 109.5 . . ?
 O26 C27 H27B 109.5 . . ?
 O26 C27 H27C 109.5 . . ?
 H27A C27 H27B 109.5 . . ?
 H27A C27 H27C 109.5 . . ?
 H27B C27 H27C 109.5 . . ?
 C13 C14 H14 119.5 . . ?
 C15 C14 C13 120.95(19) . . ?
 C15 C14 H14 119.5 . . ?

loop_
  _geom_torsion_atom_site_label_1
  _geom_torsion_atom_site_label_2
  _geom_torsion_atom_site_label_3
  _geom_torsion_atom_site_label_4
  _geom_torsion
  _geom_torsion_site_symmetry_1
  _geom_torsion_site_symmetry_2
  _geom_torsion_site_symmetry_3
  _geom_torsion_site_symmetry_4
  _geom_torsion_publ_flag
 O9 C8 C3 C2 -3.17(18) . . . . ?
 O9 C8 C3 C4 177.05(14) . . . . ?
 O9 C8 C7 C6 -177.87(15) . . . . ?
 O9 C1 C2 C3 -16.47(15) . . . . ?
 F24 C21 C20 C19 179.63(15) . . . . ?
 O26 C25 C1 O9 -5.75(18) . . . . ?
 O26 C25 C1 C10 112.29(14) . . . . ?
 O26 C25 C1 C2 -124.19(15) . . . . ?
 O28 C25 C1 O9 176.55(14) . . . . ?
 O28 C25 C1 C10 -65.41(18) . . . . ?
 O28 C25 C1 C2 58.11(19) . . . . ?
 N11 C10 C1 O9 -55.56(16) . . . . ?
 N11 C10 C1 C25 -175.26(12) . . . . ?
 N11 C10 C1 C2 63.06(16) . . . . ?
 N11 C10 C18 C23 52.9(2) . . . . ?
 N11 C10 C18 C19 -129.26(16) . . . . ?
 N11 C12 C13 C14 -172.97(15) . . . . ?
 N11 C12 C17 C16 172.25(16) . . . . ?
 C10 N11 C12 C13 -173.31(14) . . . . ?
 C10 N11 C12 C17 10.3(2) . . . . ?
 C10 C1 C2 C3 -136.13(13) . . . . ?
 C10 C18 C23 C22 176.83(15) . . . . ?
 C10 C18 C19 C20 -177.64(15) . . . . ?
 C8 O9 C1 C10 138.12(12) . . . . ?
 C8 O9 C1 C25 -105.24(14) . . . . ?
 C8 O9 C1 C2 15.41(15) . . . . ?
 C8 C3 C2 C1 11.95(16) . . . . ?
 C8 C3 C4 C5 1.2(2) . . . . ?
 C8 C7 C6 C5 0.5(3) . . . . ?
 C25 C1 C2 C3 104.57(14) . . . . ?
 C1 O9 C8 C3 -7.98(17) . . . . ?
 C1 O9 C8 C7 171.35(14) . . . . ?
 C1 C10 C18 C23 -71.37(18) . . . . ?
 C1 C10 C18 C19 106.42(17) . . . . ?
 C18 C10 C1 O9 72.24(15) . . . . ?
 C18 C10 C1 C25 -47.46(16) . . . . ?
 C18 C10 C1 C2 -169.14(12) . . . . ?
 C18 C23 C22 C21 0.9(3) . . . . ?
 C18 C19 C20 C21 0.7(3) . . . . ?
 C12 N11 C10 C1 -157.10(13) . . . . ?
 C12 N11 C10 C18 76.77(18) . . . . ?
 C12 C13 C14 C15 -0.3(3) . . . . ?
 C12 C17 C16 C15 1.5(3) . . . . ?
 C3 C8 C7 C6 1.4(2) . . . . ?
 C3 C4 C5 C6 0.7(3) . . . . ?
 C7 C8 C3 C2 177.49(15) . . . . ?
 C7 C8 C3 C4 -2.3(2) . . . . ?
 C23 C18 C19 C20 0.2(3) . . . . ?
 C23 C22 C21 F24 179.58(15) . . . . ?
 C23 C22 C21 C20 0.0(3) . . . . ?
 C2 C3 C4 C5 -178.51(17) . . . . ?
 C22 C21 C20 C19 -0.8(3) . . . . ?
 C4 C3 C2 C1 -168.31(17) . . . . ?
 C4 C5 C6 C7 -1.6(3) . . . . ?
 C13 C12 C17 C16 -4.2(3) . . . . ?
 C17 C12 C13 C14 3.6(2) . . . . ?
 C19 C18 C23 C22 -1.0(2) . . . . ?
 C16 C15 C14 C13 -2.4(3) . . . . ?
 C27 O26 C25 O28 5.7(2) . . . . ?
 C27 O26 C25 C1 -171.90(14) . . . . ?
 C14 C15 C16 C17 1.8(3) . . . . ?

_shelx_res_file
;
TITL hongkm_201104_a.res in P2(1)/n
    hongkm_201104.res
    created by SHELXL-2018/3 at 16:54:01 on 05-Nov-2020
REM Old TITL hongkm_201104 in P2(1)/n
REM SHELXT solution in P2(1)/n: R1 0.160, Rweak 0.091, Alpha 0.018
REM <I/s> 0.527 for 143 systematic absences, Orientation as input
REM Formula found by SHELXT: C23 N O28
CELL 1.54184 6.2736 17.5212 17.2761 90 94.94 90
ZERR 4 0.0001 0.0002 0.0002 0 0.001 0
LATT 1
SYMM 0.5-X,0.5+Y,0.5-Z
SFAC C H F N O
UNIT 92 80 4 4 12

L.S. 60
PLAN  5
SIZE 0.15 0.15 0.3
CONF
MORE -1
BOND $H
fmap 2
acta
htab
REM <olex2.extras>
REM <HklSrc "%.\\hongkm_201104.hkl">
REM </olex2.extras>

WGHT    0.117300    0.457700
FVAR       0.66350
O9    5    0.408326    0.861438    0.513297    11.00000    0.01951    0.03024 =
         0.03007    0.00204   -0.00099   -0.00477
F24   3    0.381897    0.862907    0.884228    11.00000    0.07058    0.04893 =
         0.03010   -0.00250    0.00064    0.02350
O26   5    0.090535    0.924381    0.576287    11.00000    0.02488    0.02881 =
         0.04715   -0.00058    0.00557    0.00192
O28   5   -0.124785    0.822100    0.560461    11.00000    0.01997    0.03997 =
         0.04857    0.00275    0.00068   -0.00263
N11   4    0.481977    0.709311    0.552925    11.00000    0.02364    0.02979 =
         0.03583    0.00052    0.00352    0.00077
AFIX  43
H11   2    0.561796    0.733016    0.522770    11.00000   -1.20000
AFIX   0
C10   1    0.296520    0.747031    0.578783    11.00000    0.02022    0.02550 =
         0.03441    0.00163    0.00077   -0.00050
AFIX  13
H10   2    0.180371    0.709467    0.575963    11.00000   -1.20000
AFIX   0
C8    1    0.413304    0.879028    0.435934    11.00000    0.02285    0.02899 =
         0.03038    0.00204    0.00091    0.00483
C25   1    0.044457    0.853677    0.553702    11.00000    0.01997    0.02913 =
         0.03363    0.00493   -0.00193    0.00104
C1    1    0.227933    0.811509    0.520178    11.00000    0.01908    0.02775 =
         0.03265    0.00088   -0.00077   -0.00267
C18   1    0.323148    0.776122    0.661897    11.00000    0.02275    0.02669 =
         0.03260    0.00418    0.00128    0.00342
C12   1    0.533470    0.634942    0.576186    11.00000    0.02756    0.03079 =
         0.02944   -0.00491   -0.00555    0.00094
C3    1    0.267694    0.837224    0.388051    11.00000    0.02865    0.02851 =
         0.03303   -0.00137   -0.00195    0.00421
C7    1    0.547197    0.933290    0.407918    11.00000    0.02678    0.03090 =
         0.03755    0.00326    0.00389    0.00242
AFIX  43
H7    2    0.645930    0.959978    0.440826    11.00000   -1.20000
AFIX   0
C23   1    0.494388    0.822949    0.686740    11.00000    0.02782    0.03521 =
         0.03282    0.00343    0.00024   -0.00285
AFIX  43
H23   2    0.597205    0.834459    0.652835    11.00000   -1.20000
AFIX   0
C2    1    0.158348    0.781931    0.437802    11.00000    0.02776    0.03213 =
         0.03492   -0.00258   -0.00471   -0.00270
AFIX  23
H2A   2    0.207461    0.730125    0.430606    11.00000   -1.20000
H2B   2    0.004140    0.783831    0.426965    11.00000   -1.20000
AFIX   0
C22   1    0.514038    0.852731    0.761353    11.00000    0.04168    0.03510 =
         0.03469    0.00034   -0.00434   -0.00104
AFIX  43
H22   2    0.627663    0.884636    0.777593    11.00000   -1.20000
AFIX   0
C21   1    0.361553    0.834013    0.810876    11.00000    0.04734    0.03591 =
         0.02939    0.00147    0.00064    0.01592
C4    1    0.247618    0.851337    0.308749    11.00000    0.04160    0.03380 =
         0.03257   -0.00212   -0.00392    0.00708
AFIX  43
H4    2    0.148879    0.824458    0.276021    11.00000   -1.20000
AFIX   0
C13   1    0.726822    0.603514    0.556474    11.00000    0.03642    0.04647 =
         0.02903   -0.00348   -0.00158    0.01092
AFIX  43
H13   2    0.824883    0.634014    0.533418    11.00000   -1.20000
AFIX   0
C17   1    0.394764    0.588531    0.614872    11.00000    0.03114    0.03137 =
         0.04777    0.00173   -0.00626   -0.00272
AFIX  43
H17   2    0.269826    0.608975    0.631576    11.00000   -1.20000
AFIX   0
C19   1    0.172894    0.758599    0.713897    11.00000    0.02742    0.04165 =
         0.03869    0.00724    0.00539   -0.00020
AFIX  43
H19   2    0.057957    0.727186    0.697905    11.00000   -1.20000
AFIX   0
C5    1    0.377939    0.906449    0.279083    11.00000    0.05364    0.04052 =
         0.02929    0.00464    0.00382    0.01222
AFIX  43
H5    2    0.365280    0.916906    0.226110    11.00000   -1.20000
AFIX   0
C6    1    0.526976    0.946020    0.328029    11.00000    0.03938    0.03690 =
         0.04002    0.00847    0.00839    0.00439
AFIX  43
H6    2    0.615084    0.981768    0.306965    11.00000   -1.20000
AFIX   0
C20   1    0.191101    0.787113    0.789317    11.00000    0.03728    0.05168 =
         0.03789    0.00803    0.01063    0.00854
AFIX  43
H20   2    0.091101    0.774830    0.824055    11.00000   -1.20000
AFIX   0
C15   1    0.630299    0.480879    0.605663    11.00000    0.06585    0.03111 =
         0.04717   -0.00629   -0.02312    0.01228
AFIX  43
H15   2    0.659765    0.429309    0.613565    11.00000   -1.20000
AFIX   0
C16   1    0.443401    0.512254    0.628281    11.00000    0.04571    0.03160 =
         0.05676    0.00323   -0.01617   -0.00594
AFIX  43
H16   2    0.348652    0.481682    0.652912    11.00000   -1.20000
AFIX   0
C27   1   -0.072168    0.961447    0.617980    11.00000    0.03362    0.03614 =
         0.06312   -0.00274    0.01414    0.00680
AFIX 137
H27A  2   -0.209265    0.955562    0.589361    11.00000   -1.50000
H27B  2   -0.039299    1.014758    0.623808    11.00000   -1.50000
H27C  2   -0.075492    0.938521    0.668332    11.00000   -1.50000
AFIX   0
C14   1    0.772843    0.527359    0.571094    11.00000    0.05543    0.05155 =
         0.03448   -0.00971   -0.00997    0.02471
AFIX  43
H14   2    0.901500    0.507154    0.557472    11.00000   -1.20000
AFIX   0
HKLF 4


REM  hongkm_201104_a.res in P2(1)/n
REM wR2 = 0.1731, GooF = S = 1.047, Restrained GooF = 1.047 for all data
REM R1 = 0.0578 for 3345 Fo > 4sig(Fo) and 0.0648 for all 3940 data
REM 254 parameters refined using 0 restraints

END

WGHT      0.1173      0.4533

REM Instructions for potential hydrogen bonds
EQIV $1 x+1, y, z
HTAB N11 O28_$1
EQIV $2 -x+1, -y+2, -z+1
HTAB C7 O26_$2
EQIV $3 x+1/2, -y+3/2, z-1/2
HTAB C13 F24_$3

REM Highest difference peak  0.410,  deepest hole -0.506,  1-sigma level  0.066
Q1    1   0.6081  0.7444  0.5616  11.00000  0.05    0.41
Q2    1   0.4088  0.9181  0.5143  11.00000  0.05    0.36
Q3    1   0.2805  0.7806  0.5559  11.00000  0.05    0.33
Q4    1   0.3948  0.8005  0.8813  11.00000  0.05    0.33
Q5    1   0.3853  0.9231  0.8832  11.00000  0.05    0.31
;
_shelx_res_checksum                84436
_shelx_hkl_file
;
   0   0  -1    0.17    0.29
   0   0  -2 3230.20  251.95
   0   0  -3    1.29    0.98
   0   0   3   -0.82    0.82
   0   0   4 2421.08  180.02
   0   0  -4 2166.42  180.12
   0   0   5    0.18    1.17
   0   0  -5    0.50    1.04
   0   0  -5    0.68    1.27
   0   0  -6 4821.26  387.56
   0   0  -6 4963.90  388.12
   0   0   6 5137.79  387.81
   0   0  -7    0.70    1.65
   0   0   7   -0.35    1.21
   0   0  -7    0.47    1.26
   0   0   7    1.11    1.57
   0   0   7    1.23    2.21
   0   0   8 2575.71  218.96
   0   0   8 2855.61  219.96
   0   0  -8 2802.91  219.54
   0   0  -8 3116.10  220.72
   0   0   8 3063.12  221.01
   0   0   9   -0.79    1.53
   0   0   9   -1.08    1.22
   0   0  -9   -0.51    1.99
   0   0  -9    0.31    1.29
   0   0   9   -1.12    2.57
   0   0   9   -0.55    2.21
   0   0 -10  200.65   18.30
   0   0 -10  187.89   16.84
   0   0  10  179.70   17.28
   0   0  10  186.57   18.28
   0   0  10  201.48   16.79
   0   0  10  190.21   18.31
   0   0 -11   -1.45    2.45
   0   0 -11    0.40    1.41
   0   0  11    2.16    3.03
   0   0  11    1.06    1.73
   0   0  11    0.36    1.51
   0   0  11   -0.73    2.37
   0   0 -12   40.37    6.75
   0   0 -12   36.63    4.87
   0   0  12   27.15    3.71
   0   0  12   32.54    6.10
   0   0  12   24.38    4.96
   0   0  12   40.12    4.86
   0   0  12   33.89    4.70
   0   0  12   33.69    6.10
   0   0 -13    0.96    2.55
   0   0 -13    0.49    1.37
   0   0  13   -0.25    1.34
   0   0  13   -0.96    3.00
   0   0  13    0.91    2.95
   0   0  13   -0.68    2.03
   0   0  13   -0.42    2.23
   0   0  13   -0.45    1.83
   0   0  13   -0.92    2.85
   0   0 -14   76.80   10.18
   0   0 -14   52.82    6.89
   0   0  14   55.22    5.90
   0   0  14   45.82    8.42
   0   0  14   49.39    8.98
   0   0  14   68.99    7.18
   0   0  14   57.32    7.13
   0   0  14   49.16    8.67
   0   0 -15    1.14    2.84
   0   0  15    0.27    1.48
   0   0  15    1.12    2.97
   0   0  15    1.07    3.01
   0   0  15   -3.20    3.47
   0   0  15    2.92    2.46
   0   0  15   -0.52    1.84
   0   0  15    2.15    3.35
   0   0 -16  484.32   41.71
   0   0  16  443.47   36.38
   0   0  16  472.12   41.19
   0   0  16  512.48   38.02
   0   0  16  465.68   38.06
   0   0  16  453.93   41.05
   0   0  16  350.49   39.92
   0   0 -16  413.45   39.32
   0   0  16  407.75   40.35
   0   0  17   -1.00    2.52
   0   0  17    0.52    1.48
   0   0 -17   -0.57    1.47
   0   0  17   -2.16    3.05
   0   0  17    0.50    2.73
   0   0  18  181.63   16.06
   0   0  18  201.21   17.56
   0   0 -18  181.47   17.45
   0   0 -18  167.96   16.00
   0   0  18  253.04   18.53
   0   0  18  191.15   17.98
   0   0  18  203.33   17.59
   0   0  19    1.77    1.32
   0   0 -19    0.42    2.55
   0   0  19   -0.42    2.29
   0   0  19    1.35    1.82
   0   0 -19    0.39    0.63
   0   0  19   -1.86    2.40
   0   0  19    0.47    2.31
   0   0  19   -1.26    2.33
   0   0  20   52.32    3.85
   0   0  20   44.57    4.55
   0   0  20   55.66    4.76
   0   0  20   39.22    4.28
   0   0  20   60.42    4.94
   0   0 -20   44.29    4.49
   0   0  21    1.19    1.54
   0   0  21   -0.81    1.61
   0   0 -21   -0.79    1.82
   0   0 -21   -0.51    1.44
   0   0  21    1.16    1.46
   0   0  21   -0.77    1.76
   0   1   0    0.23    0.28
   0  -1   0    3.51    0.40
   0  -1  -1  391.03   35.28
   0   1  -1  460.85   35.50
   0   1  -2  773.38   60.03
   0  -1   2  789.67   59.83
   0   1   2  752.67   59.70
   0  -1  -2  741.25   59.98
   0  -1  -3  100.56    9.16
   0   1   3  112.75    8.88
   0   1  -3  100.60    9.19
   0  -1   3  112.51    8.98
   0  -1  -4 4749.27  354.04
   0   1  -4 4295.33  353.95
   0   1   4 4647.95  353.60
   0  -1   4 4544.81  353.58
   0   1  -4 4415.61  353.72
   0   1  -5 1342.95  108.39
   0  -1   5 1327.06  107.81
   0  -1  -5 1332.05  108.36
   0  -1   5 1464.41  108.37
   0   1   5 1428.09  107.97
   0   1  -5 1367.70  108.03
   0   1   6 1323.90  104.05
   0   1  -6 1326.06  104.65
   0  -1  -6 1339.38  104.60
   0  -1   6 1357.13  104.48
   0   1  -6 1342.79  104.15
   0  -1   6 1273.80  103.80
   0   1   7  127.15   10.99
   0  -1   7  119.85   11.25
   0   1  -7  121.92   10.91
   0  -1  -7  137.11   11.69
   0  -1  -7  125.14   10.87
   0   1  -7  127.12   11.71
   0  -1   7  108.55   10.39
   0   1   7  133.99   11.97
   0   1  -8 1317.41  104.78
   0  -1  -8 1341.56  104.63
   0  -1   8 1349.82  105.26
   0   1  -8 1404.89  105.83
   0   1   8 1250.38  104.73
   0  -1  -8 1480.10  105.79
   0  -1   8 1198.49  104.04
   0   1   8 1572.13  106.35
   0   1  -9  296.87   21.64
   0  -1  -9  290.69   21.36
   0   1  -9  224.97   19.78
   0   1   9  225.32   19.04
   0   1   9  211.09   19.78
   0  -1   9  205.81   18.86
   0  -1  -9  230.63   19.60
   0  -1   9  238.01   20.38
   0  -1   9  238.27   21.23
   0   1   9  247.57   21.29
   0  -1  10  207.23   20.19
   0   1 -10  308.62   23.50
   0   1  10  237.21   21.55
   0  -1  10  275.20   22.31
   0  -1 -10  250.73   21.21
   0   1 -10  252.65   21.47
   0  -1 -10  297.60   23.09
   0   1  10  239.18   21.05
   0  -1  10  281.48   23.26
   0   1  10  288.11   23.23
   0  -1 -11  234.55   20.52
   0  -1 -11  260.89   22.49
   0   1 -11  250.47   22.68
   0  -1  11  215.20   21.28
   0   1  11  223.47   21.05
   0   1 -11  215.04   20.63
   0   1  11  241.33   22.41
   0   1  11  253.88   20.62
   0  -1  11  264.02   22.94
   0  -1 -12  128.56   12.09
   0   1 -12  182.60   16.01
   0   1  12  111.30   12.54
   0   1 -12  129.09   12.45
   0  -1  12  129.58   13.24
   0  -1 -12  157.82   14.73
   0   1  12  114.99   11.06
   0  -1  12  112.04   11.05
   0   1  12  145.97   14.66
   0  -1  12  134.82   12.21
   0   1  12  130.59   12.20
   0  -1  12  134.02   14.32
   0   1 -13   75.68    9.49
   0  -1  13  101.78   11.12
   0  -1 -13  106.95   12.25
   0  -1 -13   94.15    9.70
   0   1 -13  107.95   12.60
   0  -1  13   89.77    8.65
   0   1  13   85.73    8.55
   0   1  13   99.20   11.78
   0   1  13   87.79   12.03
   0  -1  13  106.46    9.80
   0   1  13   97.93    9.69
   0  -1  13   89.75   11.58
   0  -1 -14   59.79    8.83
   0   1 -14   53.27    6.71
   0   1 -14   43.70    8.15
   0  -1  14   41.63    5.34
   0   1  14   48.63    5.38
   0   1  14   52.96    8.58
   0   1  14   39.00    7.90
   0  -1  14   61.19    6.66
   0   1  14   75.64    7.21
   0  -1  14   43.12    7.96
   0  -1  15    0.87    1.53
   0   1  15    1.83    1.50
   0   1  15    2.24    3.16
   0  -1  15    1.06    2.83
   0   1  15    2.14    3.02
   0  -1  15    2.43    2.24
   0   1  15    0.52    2.37
   0   1 -15    5.96    3.88
   0  -1 -15    4.35    3.39
   0  -1  16   82.34   12.16
   0  -1  16   90.10    8.62
   0   1  16   88.65    8.36
   0   1 -16   97.01   12.81
   0  -1 -16   92.45   12.31
   0  -1  16  109.16   10.20
   0   1  16   98.78   10.00
   0   1  16   57.75   10.97
   0   1  16   70.99   11.44
   0   1 -16  101.92   11.73
   0  -1 -16   82.37   11.05
   0  -1  16   77.05   11.89
   0  -1  17    9.67    2.28
   0   1  17    8.37    2.04
   0  -1  17    9.41    3.06
   0   1  17   11.88    3.58
   0  -1 -17   10.41    2.35
   0   1 -17    8.40    2.09
   0  -1  17    4.95    2.91
   0  -1  18    2.24    1.77
   0   1  18    5.97    1.78
   0   1 -18   13.95    3.87
   0  -1  18    6.10    3.19
   0  -1  18    1.97    2.18
   0   1  18    4.12    2.96
   0  -1 -18    2.66    1.55
   0   1 -18    3.33    1.38
   0  -1  18    2.79    2.91
   0   1  18    3.71    2.51
   0  -1  19   -0.42    1.28
   0   1  19    1.28    1.16
   0   1 -19    0.42    2.64
   0  -1  19   -0.42    2.52
   0   1  19   -0.71    1.88
   0  -1  19    0.32    1.58
   0   1  19    0.93    1.99
   0  -1 -19    1.93    1.21
   0   1  19   -0.94    2.39
   0  -1  19    1.23    2.47
   0  -1  20   12.77    2.02
   0  -1  20   15.76    3.28
   0   1 -20   12.98    3.35
   0   1  20   14.17    2.67
   0   1  20   21.47    3.69
   0  -1  20   13.22    2.98
   0   1  20   10.54    3.08
   0   1 -21    0.52    1.74
   0  -1  21   -0.78    1.83
   0   1  21   -1.46    1.48
   0  -1 -21    2.98    1.68
   0  -1  21   -0.50    1.63
   0   1  21    0.57    1.70
   0   1 -21    0.18    0.87
   0  -2   0 1849.63  146.87
   0   2   0 1921.66  146.96
   0  -2  -1   48.11    4.13
   0   2  -1   51.86    4.27
   0   2   1   43.47    4.27
   0  -2   2   27.96    2.65
   0   2  -2   21.36    2.86
   0   2  -2   29.24    2.79
   0   2  -3  375.87   28.76
   0   2   3  333.92   28.00
   0  -2   3  382.59   28.30
   0   2   4 3389.49  274.52
   0  -2   4 3640.02  274.75
   0   2  -4 3641.30  275.32
   0   2  -5   28.41    3.32
   0   2   5   27.10    2.94
   0  -2   5   26.32    3.04
   0   2  -5   30.91    3.80
   0   2   6  272.88   19.31
   0   2   6  207.37   17.83
   0   2  -6  222.21   18.26
   0   2  -6  220.49   18.87
   0  -2   6  202.01   17.82
   0  -2   6  217.01   18.63
   0  -2   7   63.73    6.99
   0   2   7   63.48    6.89
   0  -2   7   56.18    5.62
   0   2   7   54.56    5.75
   0  -2   7   67.50    6.70
   0   2  -7   61.36    6.75
   0   2  -7   56.84    6.05
   0  -2  -7   62.86    6.60
   0  -2   8 1172.18  103.83
   0   2   8 1371.80  104.01
   0  -2  -8 1521.08  103.90
   0   2   8 1106.77  102.36
   0  -2   8 1374.25  103.49
   0   2  -8 1316.15  102.88
   0   2  -8 1468.30  104.20
   0  -2   8 1234.63  102.09
   0  -2  -8 1392.56  102.70
   0   2   9  476.71   36.65
   0  -2   9  380.79   35.95
   0  -2   9  442.09   36.59
   0   2   9  434.92   36.57
   0  -2  -9  439.53   34.83
   0  -2   9  429.65   35.84
   0   2  -9  483.44   36.78
   0  -2   9  408.18   34.19
   0  -2  -9  478.39   36.25
   0   2  -9  415.70   35.17
   0   2   9  381.91   34.77
   0  -2  10   54.14    7.83
   0   2  10   69.29    8.15
   0   2  10   86.71    7.03
   0  -2  10   63.40    6.56
   0  -2  10   75.82    8.36
   0   2  10   53.89    7.70
   0  -2 -10   62.36    7.66
   0   2  10   65.01    6.88
   0  -2  10   47.74    7.00
   0   2 -10   49.38    6.59
   0  -2 -10   58.34    6.36
   0   2 -10   79.38    8.74
   0  -2  10   50.43    5.70
   0  -2  11  243.22   22.86
   0   2  11  243.10   22.91
   0  -2 -11  246.18   22.52
   0  -2  11  237.68   22.20
   0   2 -11  295.60   23.92
   0  -2 -11  237.37   20.84
   0   2 -11  235.94   21.38
   0  -2  11  233.99   20.86
   0   2  11  231.38   20.84
   0  -2  11  250.79   22.90
   0   2  11  256.44   23.15
   0   2  12   27.89    5.64
   0  -2  12   31.00    5.66
   0   2 -12   22.26    4.11
   0  -2 -12   23.19    3.79
   0   2 -12   42.85    6.89
   0  -2 -12   30.20    5.55
   0   2  12   24.69    3.24
   0  -2  12   20.82    3.23
   0   2  12   25.54    4.07
   0  -2  12   26.43    4.91
   0  -2  12   19.74    3.68
   0  -2 -12   26.11    4.18
   0  -2  12   22.67    3.95
   0   2  12   34.95    4.54
   0  -2  12   29.68    5.77
   0   2  12   36.44    6.29
   0   2  13  101.00   15.34
   0  -2  13   93.32   15.03
   0   2  13  163.09   16.48
   0  -2  13  131.78   15.76
   0  -2 -13  210.98   17.34
   0  -2  13  155.84   15.55
   0   2 -13  152.19   14.47
   0   2 -13  161.29   17.25
   0  -2 -13  130.04   13.50
   0  -2  13  129.07   12.75
   0   2  13  134.76   12.64
   0  -2  13  157.48   13.84
   0   2  13  148.71   13.81
   0  -2 -13  161.25   14.22
   0  -2  13  169.74   14.22
   0   2  13  180.30   14.32
   0   2  13  153.34   16.28
   0  -2  13  174.39   16.75
   0  -2  14   45.14    7.94
   0  -2  14   38.82    7.22
   0   2  14   30.19    6.51
   0   2  14   28.15    6.37
   0  -2  14   32.86    6.78
   0   2  14   27.56    6.73
   0   2 -14   29.26    6.82
   0   2 -14   32.26    5.21
   0  -2 -14   27.21    6.19
   0  -2  14   34.89    4.31
   0   2  14   27.03    3.80
   0   2  14   40.50    5.34
   0  -2  14   43.41    5.39
   0  -2  14   27.07    5.72
   0  -2 -14   33.10    5.17
   0  -2  14   34.29    5.15
   0   2  14   42.95    5.46
   0  -2  14   34.13    7.08
   0   2  14   30.34    6.54
   0   2  15   -1.07    2.85
   0  -2  15    6.36    3.59
   0   2  15    4.50    3.66
   0  -2  15   -1.06    3.16
   0   2  15    3.23    3.20
   0  -2  15    1.11    2.56
   0  -2  15    2.47    1.79
   0   2  15    0.25    1.28
   0   2 -15   -1.24    3.28
   0   2 -15    0.62    1.64
   0  -2 -15   -1.04    3.10
   0  -2  15    2.91    2.58
   0   2  15   -3.91    2.94
   0  -2  15    1.04    2.14
   0   2  15    2.10    2.52
   0   2  15   -1.08    3.37
   0  -2  15   -1.07    3.02
   0   2  16    1.11    2.76
   0  -2  16    4.57    3.23
   0  -2  16    9.84    3.99
   0  -2  16    7.68    4.13
   0   2 -16    0.85    2.90
   0  -2 -16    0.90    3.28
   0   2  16    6.64    3.76
   0   2  16    1.16    2.67
   0   2 -16    4.90    4.16
   0  -2 -16    1.09    2.29
   0   2  16    3.19    1.59
   0  -2  16    5.25    2.19
   0   2  16    9.06    3.14
   0  -2  16   10.95    3.28
   0  -2 -16    1.75    1.79
   0   2  16    4.88    2.89
   0  -2  16    3.22    2.38
   0   2  16   -1.12    4.08
   0  -2  16   -1.11    4.77
   0  -2  17   48.89    5.24
   0   2  17   41.30    4.71
   0   2  17   48.64    6.30
   0  -2  17   52.49    6.42
   0  -2  17   41.97    5.78
   0   2  17   51.77    6.54
   0  -2 -17   46.96    5.26
   0   2 -17   36.25    4.50
   0  -2  17   31.99    5.64
   0   2  17   45.65    6.11
   0  -2  17   44.45    6.36
   0  -2  18    0.79    1.56
   0   2  18    0.82    1.21
   0   2 -18    4.56    3.06
   0  -2 -18    3.29    3.00
   0   2  18    0.93    2.48
   0  -2  18   -0.46    2.63
   0  -2  18    0.76    1.85
   0  -2  18    3.51    2.58
   0   2  18   -1.52    2.44
   0  -2 -18    2.26    1.50
   0  -2  18    0.45    2.38
   0  -2  18    1.03    2.46
   0   2  18    3.25    2.72
   0   2  18    1.05    2.61
   0   2  19    0.66    0.96
   0  -2  19    1.09    1.40
   0   2  19    2.07    2.46
   0  -2 -19    0.42    2.70
   0   2 -19    1.22    2.54
   0  -2  19   -0.41    2.30
   0   2  19    0.73    2.08
   0  -2  19   -2.69    2.53
   0   2  19    2.27    2.30
   0  -2 -19    0.69    1.12
   0  -2  19   -0.90    2.15
   0  -2  19    1.19    2.36
   0   2  19   -0.41    2.24
   0   2  19   -0.92    2.30
   0  -2  20   12.50    1.78
   0   2  20    7.86    2.45
   0   2 -20   12.83    3.03
   0  -2  20   13.68    2.93
   0  -2 -20   12.86    2.90
   0   2  20    9.09    2.30
   0  -2 -20    0.33    0.70
   0   2  20   11.68    2.83
   0  -2  20   10.33    2.66
   0   2  20    2.63    2.09
   0  -2  20    6.90    2.48
   0   2  20   11.04    2.76
   0  -2  20   10.94    2.62
   0   2 -21    9.04    1.54
   0   2  21    3.48    1.41
   0   2  21    5.99    1.82
   0  -2  21    7.61    1.97
   0  -2  21    8.24    1.99
   0   2 -21    4.87    2.10
   0   2  21   10.28    2.12
   0  -2 -21    4.34    2.00
   0   2  21    1.60    1.52
   0  -2  21    2.30    1.32
   0   2 -21    0.24    1.39
   0   2  21    5.48    1.89
   0  -2  21    9.31    1.97
   0  -2 -21    0.23    1.34
   0   3   0    0.63    0.98
   0  -3   0    0.77    0.91
   0  -3  -1 2866.31  224.00
   0   3   1 2819.61  224.25
   0   3  -1 3063.01  224.20
   0   3   1 2638.69  223.64
   0  -3   1 2952.20  223.70
   0   3   1 3013.84  223.67
   0   3   2  262.62   18.07
   0   3  -2  231.94   18.32
   0  -3   2  218.28   18.10
   0  -3  -2  188.73   18.00
   0   3  -3  777.93   62.78
   0   3  -3  793.09   63.25
   0  -3   3  807.78   62.60
   0  -3   4 1671.85  134.68
   0   3  -4 1812.11  135.52
   0   3   5  132.25   12.10
   0   3  -5  140.25   12.42
   0  -3   5  133.37   11.47
   0  -3   6   71.59    7.90
   0   3   6   91.53    8.18
   0   3   6   73.58    6.96
   0  -3   6   72.94    7.87
   0   3  -6   78.61    7.53
   0   3  -6   87.51    8.36
   0  -3   6   79.62    7.19
   0   3   7   22.21    3.83
   0  -3   7   22.22    4.01
   0   3  -7   29.01    3.62
   0  -3   7   29.31    4.09
   0  -3   7   22.34    3.06
   0   3  -7   32.00    4.56
   0   3   7   22.48    3.04
   0   3   8   16.84    2.79
   0   3  -8   18.77    3.36
   0  -3   8   20.83    3.84
   0   3  -8   24.77    4.31
   0  -3   8   19.60    2.78
   0  -3   8   18.93    3.73
   0   3   8   25.67    4.22
   0   3   8   23.05    4.11
   0  -3   8   21.19    4.05
   0   3   9  120.02   12.55
   0  -3  -9  149.28   12.76
   0  -3   9  122.99   12.18
   0   3  -9  142.01   13.27
   0  -3   9  140.11   13.76
   0   3  -9  180.82   15.14
   0  -3   9  170.34   14.62
   0   3   9  164.63   14.54
   0   3   9  170.10   14.56
   0  -3   9  147.20   14.21
   0  -3  10    3.84    2.60
   0   3  10    7.65    3.26
   0  -3  10    6.48    1.62
   0   3 -10    9.47    2.49
   0  -3 -10    4.41    1.64
   0   3 -10   10.34    3.57
   0  -3  10    7.95    2.87
   0  -3  10    5.44    1.99
   0   3  10    8.61    2.28
   0   3  10    5.15    3.01
   0  -3  10    7.74    3.13
   0  -3  11    6.54    3.15
   0   3  11   10.23    3.77
   0  -3  11   10.32    2.08
   0   3 -11   16.17    4.44
   0  -3 -11    9.27    2.25
   0  -3 -11   11.21    3.48
   0   3 -11    9.63    2.76
   0  -3  11   10.22    2.57
   0   3  11   12.30    2.77
   0  -3  11    7.69    3.04
   0   3  11   11.28    2.58
   0  -3  11    7.60    2.45
   0  -3  11    6.61    3.10
   0   3  11   10.33    3.74
   0   3  12   19.89    5.06
   0  -3  12   21.30    5.24
   0   3 -12   25.37    5.88
   0   3 -12   20.22    4.03
   0  -3 -12   21.56    3.46
   0  -3 -12   14.39    4.22
   0  -3  12   21.24    3.06
   0   3  12   19.86    2.90
   0   3  12   21.90    3.59
   0  -3  12   19.82    3.58
   0  -3  12   22.12    4.68
   0   3  12   25.86    3.92
   0  -3  12   19.92    3.72
   0  -3  12   15.73    4.55
   0   3  12   23.40    5.22
   0   3  13    8.34    3.77
   0  -3  13    4.82    3.47
   0  -3  13   10.03    4.26
   0   3  13   10.78    4.08
   0  -3 -13   11.93    3.74
   0   3 -13   14.00    3.41
   0   3 -13   10.88    4.51
   0   3  13    8.65    1.97
   0  -3  13    9.56    2.28
   0  -3  13   10.95    3.08
   0  -3  13   11.83    3.99
   0   3  13    9.38    2.84
   0  -3 -13    7.18    2.76
   0  -3  13    9.46    2.99
   0   3  13    9.59    2.94
   0  -3  13    5.53    3.32
   0   3  13   13.98    4.52
   0  -3  14   68.37    9.55
   0   3  14   80.52   10.34
   0   3  14   58.84    9.38
   0  -3  14   48.03    8.96
   0  -3  14   52.84    9.12
   0   3  14   44.59    8.90
   0   3  14   57.91    9.24
   0  -3  14   44.83    8.67
   0  -3  14   67.69    6.75
   0   3  14   53.70    6.05
   0   3  14   74.19    7.59
   0  -3  14   59.91    7.18
   0  -3  14   56.59    8.63
   0  -3 -14   72.02    7.80
   0   3  14   71.78    7.66
   0  -3  14   67.18    7.48
   0   3 -14   58.59    7.90
   0  -3 -14   68.00    9.46
   0   3 -14   53.41    9.60
   0  -3  15   52.38    8.76
   0   3  15   55.32    9.04
   0  -3  15   56.03    9.02
   0   3  15   39.84    8.28
   0   3 -15   44.51    7.47
   0   3  15   58.35    9.35
   0   3  15   71.18    9.92
   0  -3  15   37.51    7.91
   0  -3  15   37.17    7.94
   0  -3  15   48.22    5.85
   0   3  15   50.53    5.31
   0   3  15   48.10    6.52
   0  -3  15   58.06    6.77
   0  -3  15   60.45    8.57
   0  -3 -15   53.39    6.82
   0  -3  15   57.70    6.89
   0   3  15   57.16    6.99
   0  -3 -15   38.47    7.66
   0   3 -15   57.93    9.58
   0   3 -15   41.08    6.66
   0  -3  16   60.47    9.66
   0   3  16   69.93    7.89
   0   3  16   59.18    9.60
   0  -3  16   67.61    7.80
   0   3  16   57.45    9.59
   0   3 -16   51.52    8.40
   0  -3 -16   69.04    9.46
   0  -3  16   48.77    9.12
   0  -3  16   71.80    6.94
   0   3  16   55.25    6.12
   0   3  16   65.65    7.76
   0  -3  16   73.05    7.93
   0  -3  16   54.22    7.22
   0   3  16   79.77    8.23
   0  -3 -16   81.58    7.28
   0  -3  16   57.69    7.53
   0  -3 -16   63.09    9.51
   0   3 -16   42.39    9.00
   0  -3  17    6.26    3.09
   0   3  17    4.90    2.71
   0   3  17    4.10    1.50
   0  -3  17    4.02    2.07
   0  -3  17    9.95    3.36
   0  -3 -17    5.42    2.19
   0   3  17    2.13    2.48
   0   3  17    8.82    3.28
   0   3  17    5.54    2.87
   0  -3  17    4.34    3.12
   0  -3  17    3.83    2.57
   0   3  18   23.43    2.97
   0  -3  18   22.98    3.42
   0  -3  18   22.72    4.23
   0   3  18   27.34    4.43
   0   3 -18   20.31    4.30
   0  -3 -18   25.12    4.80
   0   3  18   29.38    4.71
   0  -3  18   27.73    4.57
   0  -3 -18   22.08    3.34
   0   3  18   29.12    5.14
   0   3  18   21.71    4.24
   0  -3  18   15.94    4.11
   0  -3  18   24.63    4.36
   0  -3  19    5.86    1.75
   0   3  19    4.76    2.52
   0  -3 -19    4.86    2.81
   0  -3  19    6.60    2.75
   0   3 -19    3.90    2.59
   0   3  19    6.30    2.44
   0  -3 -19    5.02    1.65
   0  -3  19    2.56    2.26
   0   3  19    0.43    2.03
   0  -3  19    6.42    2.61
   0   3  19    1.96    2.30
   0  -3  19    4.28    2.47
   0   3  19    4.42    2.62
   0  -3  20    3.15    1.34
   0   3 -20    3.99    1.58
   0  -3 -20    5.80    2.56
   0   3  20    2.85    2.14
   0   3 -20    3.47    2.21
   0  -3  20    4.67    2.08
   0   3  20    1.46    1.78
   0  -3  20    4.83    2.17
   0  -3 -20    2.78    1.23
   0   3  20    4.89    2.22
   0  -3  20    0.34    1.60
   0  -3  20    4.46    2.12
   0   3  20    3.51    2.10
   0   3  20    5.62    2.27
   0   3 -21    1.45    0.86
   0   3  21    1.87    1.29
   0  -3  21    1.44    1.30
   0   3  21    2.78    1.42
   0   3 -21    1.29    1.63
   0  -3  21    0.85    1.24
   0  -3 -21    5.20    1.91
   0   3 -21   -1.08    1.22
   0  -3 -21    0.21    1.27
   0  -3  21    2.95    1.38
   0   3  21    2.93    1.53
   0  -4   0 1299.78  102.19
   0   4   0 1306.15  102.44
   0   4  -1 3127.59  177.95
   0   4   1 3309.23  178.28
   0  -4  -1 3127.29  177.67
   0  -4   1 2185.91  176.79
   0   4   1 2336.63  176.78
   0  -4   1 2123.43  176.77
   0   4   1 2148.06  176.77
   0  -4   1 1952.82  176.75
   0  -4   1 2437.87  176.81
   0   4   1 2174.50  176.78
   0   4  -1 2794.14  176.77
   0   4   1 1925.59  176.77
   0  -4  -2  227.33   20.11
   0   4  -2  265.26   20.50
   0   4   2  245.77   19.81
   0   4   2  260.20   19.84
   0  -4   2  244.52   19.90
   0   4  -3  451.28   35.54
   0  -4   3  452.03   35.30
   0   4   3  482.05   35.20
   0  -4   3  385.26   35.15
   0   4  -4  542.18   42.13
   0  -4  -4  519.79   42.10
   0  -4   4  515.65   41.84
   0   4  -4  516.91   42.58
   0   4   4  571.67   41.99
   0  -4   4  475.94   41.93
   0   4  -5   14.68    3.19
   0  -4   5    9.92    2.19
   0  -4  -5   10.95    2.41
   0   4   5   14.33    2.49
   0  -4   6   44.62    4.88
   0  -4   6   48.15    5.62
   0   4  -6   50.32    6.05
   0   4   6   44.83    5.32
   0  -4   6   48.19    5.61
   0  -4   7  799.40   61.86
   0   4  -7  735.42   61.22
   0   4  -7  823.19   62.49
   0  -4   7  698.94   60.59
   0   4   7  852.24   61.90
   0  -4   7  771.37   61.75
   0   4   7  833.41   61.82
   0  -4   7  685.07   61.51
   0   4  -8  128.67   11.80
   0  -4   8  101.63    9.51
   0   4  -8   99.65   10.23
   0  -4   8   91.79   10.51
   0  -4   8   95.40   10.53
   0   4   8  108.06   10.81
   0   4   8  114.51   10.91
   0  -4   8  118.68   11.18
   0  -4   9    3.78    2.54
   0  -4   9    2.80    2.53
   0   4   9    1.65    2.13
   0  -4   9    1.13    2.19
   0   4   9    3.33    2.56
   0   4  -9    6.18    3.03
   0   4  -9   -0.88    1.75
   0  -4   9    1.26    1.22
   0   4  10   51.12    6.56
   0  -4  10   40.52    6.54
   0  -4  10   53.57    6.73
   0   4 -10   45.67    5.85
   0  -4 -10   37.72    4.86
   0  -4  10   35.95    4.48
   0   4 -10   43.86    6.82
   0  -4  10   33.84    4.83
   0   4  10   41.28    4.98
   0   4  10   50.98    6.61
   0  -4  10   48.73    6.79
   0   4  11   30.89    5.49
   0  -4  11   14.64    4.25
   0  -4  11   18.02    3.09
   0  -4 -11   27.84    3.66
   0   4 -11   26.81    5.62
   0   4 -11   24.90    4.40
   0  -4  11   23.85    4.88
   0  -4  11   22.63    3.61
   0   4  11   27.50    3.89
   0   4  11   27.80    3.90
   0  -4  11   25.19    3.81
   0   4  11   20.05    4.68
   0  -4  11   25.90    5.20
   0  -4  12    4.36    3.30
   0   4  12    2.67    2.67
   0   4  12    4.18    3.26
   0  -4  12    7.43    3.40
   0  -4  12    4.65    1.52
   0  -4  12    5.34    1.85
   0   4 -12    4.88    2.39
   0   4 -12    8.98    3.88
   0   4  12    4.26    2.19
   0  -4  12    4.22    2.10
   0  -4  12    6.04    3.35
   0  -4  12    5.32    2.37
   0   4  12    4.14    2.26
   0  -4  12    8.34    3.43
   0   4  12    2.53    2.88
   0  -4  13   12.57    4.83
   0  -4  13    8.25    4.09
   0   4  13   14.98    4.44
   0   4  13   21.59    5.40
   0   4  13   16.80    5.02
   0  -4  13   20.20    5.00
   0   4 -13   22.41    4.38
   0   4 -13   24.11    5.71
   0   4  13   17.96    2.73
   0  -4  13   20.12    3.33
   0  -4  13   12.70    3.26
   0   4  13   19.34    3.69
   0  -4  13   13.23    4.05
   0  -4  13   24.03    3.94
   0   4  13   24.88    4.09
   0  -4  13   17.59    5.04
   0   4  13   14.11    4.79
   0  -4  14   36.28    7.25
   0   4  14   47.22    7.85
   0   4  14   25.68    6.92
   0  -4  14   26.89    7.06
   0  -4  14   40.80    8.09
   0  -4  14   47.04    8.03
   0   4  14   46.97    8.05
   0   4  14   45.03    7.83
   0  -4  14   41.74    5.23
   0   4  14   40.93    4.64
   0  -4  14   51.65    7.71
   0  -4  14   33.90    5.62
   0   4  14   45.70    5.92
   0  -4 -14   52.55    6.46
   0  -4  14   43.30    5.88
   0   4  14   54.64    6.29
   0   4 -14   34.81    6.01
   0   4 -14   42.15    7.98
   0   4  15   -1.12    2.99
   0  -4  15    1.06    2.63
   0  -4 -15   -1.78    3.23
   0   4 -15   -1.62    2.94
   0   4  15   11.87    4.30
   0   4  15    1.08    2.49
   0  -4  15    5.27    3.71
   0  -4  15    1.10    2.93
   0   4 -15    3.61    3.20
   0   4 -15    3.57    2.33
   0   4  15    2.29    1.30
   0  -4  15    1.05    1.83
   0  -4  15    0.94    2.79
   0   4  15    6.38    2.53
   0  -4  15    5.78    2.48
   0  -4 -15   -0.54    2.37
   0   4  15    1.96    1.27
   0   4  15    1.06    2.28
   0  -4 -15    0.79    1.89
   0  -4  15    1.04    2.24
   0   4  15   -3.26    4.33
   0  -4  15    2.13    3.17
   0  -4  16  183.66   15.67
   0   4  16  153.21   14.75
   0   4  16  204.43   16.78
   0  -4  16  190.59   16.50
   0  -4 -16  182.00   16.59
   0   4  16  180.35   16.65
   0  -4  16  190.42   16.71
   0   4  16  152.62   14.92
   0  -4 -16  185.84   15.90
   0  -4  16  173.42   16.36
   0   4  16  193.49   16.70
   0   4  17    2.59    1.35
   0  -4  17   -0.65    1.89
   0  -4  17    1.42    2.39
   0   4 -17    0.46    2.54
   0  -4 -17    0.50    2.80
   0   4  17    2.40    2.71
   0  -4 -17   -0.45    2.26
   0  -4  17    3.58    2.59
   0  -4 -17    1.05    1.81
   0   4  17   -1.05    2.46
   0  -4  17    1.59    2.49
   0   4  17    1.62    2.49
   0  -4  17    0.93    2.32
   0   4  17   -0.48    2.55
   0   4  18    2.82    1.13
   0  -4  18    6.56    2.16
   0   4  18    4.77    2.40
   0  -4 -18    6.68    2.01
   0  -4  18    4.71    2.64
   0   4  18    7.39    2.88
   0  -4  18    3.83    2.57
   0   4  18    3.92    2.51
   0  -4  18    3.80    2.50
   0  -4 -18    7.30    3.45
   0   4  18    4.81    2.52
   0  -4  18    7.31    2.70
   0   4 -18    4.66    2.97
   0  -4  19   19.68    2.89
   0  -4  19   19.42    3.55
   0   4 -19   15.35    3.57
   0  -4 -19   24.50    4.17
   0   4  19   24.16    3.79
   0   4  19   18.78    3.63
   0  -4 -19   19.62    2.86
   0  -4  19   17.28    3.46
   0  -4  19   13.63    3.31
   0  -4  19   24.80    3.74
   0   4  19   17.64    3.49
   0   4  19    9.52    3.22
   0   4 -20   -0.24    1.22
   0  -4  20   -0.17    1.06
   0   4 -20   -0.28    1.83
   0  -4  20    0.28    1.64
   0   4  20    1.99    1.79
   0  -4 -20   -1.49    2.04
   0   4  20    0.29    1.67
   0  -4 -20   -0.36    1.08
   0   4  20   -0.31    1.53
   0  -4  20   -0.31    1.69
   0  -4  20   -1.07    1.65
   0  -4  20    0.90    1.50
   0   4  20   -0.56    1.69
   0   4  20    0.94    1.59
   0  -4 -20    0.84    1.69
   0   4 -20   -0.55    1.58
   0   4 -21    0.15    0.75
   0   4  21   -0.74    1.03
   0  -4  21   -0.35    1.04
   0  -4 -21    0.18    1.25
   0   4 -21   -0.51    1.22
   0   4  21    1.01    1.09
   0   4  21    1.17    1.06
   0  -4  21    0.31    0.92
   0   4  21   -0.16    0.77
   0  -5   0    0.88    1.23
   0   5   0   -0.72    1.40
   0  -5  -1   10.82    1.85
   0   5  -1    5.03    1.67
   0   5   1    4.97    2.07
   0   5   2 1007.03   81.98
   0  -5   2 1083.76   82.07
   0   5   2  992.89   82.02
   0  -5   2  979.95   82.03
   0   5   2 1045.03   81.99
   0  -5   2 1016.57   82.04
   0   5  -2 1369.72   83.36
   0   5   2 1198.17   83.24
   0  -5  -2 1143.47   82.69
   0  -5   3   -0.46    0.97
   0   5   3   -0.40    0.87
   0   5   3    0.13    0.81
   0  -5   3    0.93    1.07
   0  -5   3   -0.61    1.38
   0  -5  -3   -0.20    1.40
   0   5  -3   -0.26    1.48
   0   5   4  371.14   28.40
   0  -5   4  363.88   28.55
   0   5   4  335.50   28.34
   0  -5   4  312.70   28.39
   0  -5   4  358.92   28.57
   0   5  -4  369.13   28.96
   0  -5   5   14.46    2.49
   0   5   5    9.17    2.14
   0  -5   5    6.00    2.03
   0   5   5   12.80    2.32
   0   5  -5   14.40    2.70
   0  -5  -5   11.13    2.41
   0  -5   5    9.27    2.17
   0   5   6  611.79   47.96
   0  -5   6  532.63   47.91
   0  -5   6  551.94   47.98
   0   5   6  617.76   48.00
   0  -5   6  579.23   47.58
   0   5  -6  609.84   48.94
   0  -5   6  597.39   48.44
   0  -5  -6  659.20   48.28
   0  -5   7  439.46   35.79
   0   5   7  428.41   35.57
   0  -5   7  404.95   35.61
   0   5   7  439.62   35.61
   0  -5   7  456.11   36.14
   0   5  -7  462.95   36.73
   0  -5   7  405.68   34.82
   0  -5  -7  421.02   35.58
   0   5   8  930.75   74.72
   0  -5   8  845.03   74.70
   0  -5   8  979.91   75.27
   0   5  -8  955.79   75.80
   0  -5  -8  966.34   74.82
   0   5  -8  926.21   74.53
   0  -5   8  890.74   73.61
   0  -5   8  931.66   74.92
   0   5   8  950.71   74.81
   0  -5   9   19.31    4.23
   0   5  -9   19.89    3.77
   0   5  -9   17.45    4.35
   0  -5  -9   18.75    3.98
   0  -5   9   17.63    2.94
   0   5   9   16.01    3.85
   0  -5   9   16.05    3.75
   0   5   9   27.83    4.39
   0  -5   9   20.98    4.25
   0  -5 -10   69.40    7.26
   0   5 -10   67.30    9.61
   0   5 -10   85.03    8.74
   0  -5  10   59.64    8.38
   0  -5  10   67.45    7.12
   0  -5 -10   84.07    8.93
   0   5  10   81.11    9.11
   0  -5  10   79.37    9.14
   0  -5  10   75.75    7.43
   0   5  10   56.57    7.02
   0   5  10   79.39    8.95
   0  -5  10   74.37    8.91
   0   5  11    2.24    2.55
   0  -5  11    7.49    3.24
   0  -5 -11    2.55    1.94
   0  -5  11    6.49    1.71
   0  -5  11    3.32    1.71
   0  -5  11    3.70    2.72
   0   5  11    5.17    2.80
   0   5  11    3.16    3.08
   0  -5  11    3.91    2.96
   0   5  11    7.58    2.36
   0  -5  11    5.89    2.24
   0  -5  11    4.37    2.58
   0   5  11    5.88    2.24
   0  -5  11    4.43    2.06
   0   5 -11    4.56    3.22
   0   5 -11    4.84    2.57
   0  -5 -11    5.16    1.67
   0   5 -12    1.00    2.65
   0   5 -12   -0.66    1.97
   0  -5  12    0.49    1.17
   0  -5  12    1.22    1.73
   0  -5  12   -0.83    2.35
   0  -5  12    1.76    3.40
   0   5  12    1.79    3.03
   0   5  12   -0.84    2.50
   0  -5  12   -0.80    2.91
   0   5  12   -1.17    1.83
   0  -5  12   -1.16    1.96
   0   5  12   -0.83    1.88
   0  -5  12    1.65    1.73
   0   5  12   -0.85    2.25
   0  -5  12    0.84    2.62
   0   5  13   59.56    9.11
   0  -5  13   47.55    8.63
   0   5  13   65.23    9.41
   0  -5  13   63.82    9.57
   0  -5  13   45.12    8.33
   0   5  13   53.71    8.69
   0  -5  13   72.05    9.53
   0   5  13   63.26    9.60
   0  -5  13   64.15    6.73
   0  -5  13   53.14    6.12
   0   5  13   61.01    6.14
   0   5  13   59.56    7.08
   0  -5  13   66.05    7.22
   0  -5  13   54.47    8.51
   0   5  13   77.36    7.56
   0  -5  13   71.57    7.46
   0   5 -13   58.07    8.09
   0   5 -13   59.17    9.52
   0  -5  14   73.75   11.54
   0   5  14   94.51   12.18
   0   5  14   95.02   12.02
   0   5  14   91.68   12.29
   0   5 -14   79.02   10.55
   0  -5  14   81.84   11.61
   0  -5  14   73.97   11.40
   0   5  14   83.97   11.65
   0  -5  14   81.02   11.47
   0  -5  14   97.85    9.07
   0   5  14   86.32    8.22
   0  -5  14   78.11    8.24
   0  -5  14   94.99    9.53
   0   5  14  101.17    9.72
   0  -5 -14  105.57   10.20
   0  -5  14   80.24    9.41
   0   5  14   91.57    8.61
   0   5  14  101.45    9.91
   0  -5 -14   96.30    9.26
   0   5 -14   82.24   10.54
   0  -5  14   96.41   11.65
   0   5 -14   83.46   12.01
   0   5  15   17.79    5.15
   0  -5  15   13.63    4.78
   0  -5  15   16.77    5.44
   0  -5  15   15.24    4.94
   0   5 -15   10.47    3.67
   0  -5 -15   20.55    4.97
   0   5  15   19.27    5.27
   0   5  15   12.88    4.56
   0   5 -15   11.53    3.59
   0   5  15   11.79    2.28
   0  -5  15   18.83    3.47
   0  -5  15   17.33    4.68
   0   5  15   15.57    3.63
   0  -5  15   23.96    4.15
   0  -5 -15   17.80    4.12
   0  -5  15   16.05    3.67
   0   5  15   20.00    4.08
   0  -5 -15   15.37    3.20
   0   5  15   14.96    2.69
   0  -5  15   17.25    3.80
   0   5  15   18.14    3.96
   0  -5  15   17.02    5.04
   0   5  15   10.81    4.47
   0  -5  16   20.85    3.49
   0   5  16   14.42    2.36
   0   5  16   17.03    3.86
   0  -5  16   16.34    3.82
   0  -5 -16   16.06    3.96
   0   5  16   24.83    4.45
   0  -5  16   22.93    4.25
   0  -5 -16   17.23    3.30
   0   5  16   14.70    2.49
   0   5  16   12.13    3.50
   0  -5  16   11.38    3.91
   0   5  16   13.68    3.82
   0  -5  16   15.79    3.70
   0  -5  17   62.39    6.49
   0   5  17   52.94    5.32
   0   5 -17   51.24    6.84
   0  -5 -17   56.54    7.12
   0   5  17   66.20    7.17
   0  -5  17   45.31    6.85
   0  -5 -17   56.06    6.83
   0  -5 -17   60.36    6.40
   0   5  17   71.24    7.49
   0  -5  17   54.32    6.95
   0  -5  17   55.68    6.92
   0   5  17   55.35    6.83
   0   5  17   56.74    7.09
   0  -5  17   37.96    6.54
   0  -5  18    8.85    2.43
   0   5  18   14.43    3.33
   0  -5  18    6.31    2.84
   0  -5 -18   12.38    2.60
   0   5  18    8.30    3.11
   0  -5  18   10.90    3.13
   0   5  18   13.08    3.32
   0  -5  18    9.23    3.19
   0  -5  18   16.43    3.33
   0   5  18   11.11    3.13
   0   5 -18    8.79    3.23
   0  -5 -18   11.44    3.63
   0  -5  19    2.58    1.66
   0   5 -19    1.58    1.59
   0   5 -19   -1.00    2.17
   0   5  19   -0.68    2.01
   0  -5 -19    2.56    2.61
   0  -5  19   -1.35    1.96
   0  -5 -19   -0.25    1.30
   0   5  19   -1.86    1.85
   0  -5  19   -0.37    1.75
   0  -5  19   -1.84    1.93
   0  -5  19   -0.98    1.94
   0   5  19   -0.67    2.26
   0   5  19   -0.38    1.87
   0  -5  20    0.81    1.09
   0   5 -20    1.79    1.23
   0  -5 -20   -0.26    1.93
   0   5 -20    0.24    1.68
   0   5  20    1.92    1.58
   0  -5  20   -1.48    1.55
   0   5  20    1.40    1.66
   0  -5 -20    1.95    1.07
   0  -5  20    0.82    1.36
   0   5  20    0.53    1.27
   0  -5  20    0.52    1.26
   0   5 -20   -0.48    1.42
   0   5  20    1.33    1.46
   0  -5 -20   -0.25    1.37
   0  -5  20    0.23    1.41
   0   5  20    1.67    1.55
   0   5  21    4.26    1.30
   0   5 -21    5.12    1.08
   0  -6   0  661.41   52.93
   0   6   0  665.54   53.40
   0   6  -1  184.03   15.85
   0  -6  -1  186.47   15.47
   0  -6   1  170.73   15.40
   0   6   1  188.95   16.11
   0   6  -2   39.61    3.39
   0   6   2   33.21    3.47
   0  -6  -2   44.60    3.51
   0  -6   2   31.46    3.45
   0  -6   2   42.48    3.51
   0  -6   2   35.78    3.51
   0   6   2   41.31    3.53
   0  -6   2   41.71    3.59
   0   6   2   39.33    3.48
   0   6   2   57.46    5.54
   0  -6  -2   44.67    3.57
   0  -6  -2   52.19    4.78
   0   6  -2   57.71    5.25
   0   6   3   89.36    8.16
   0   6   3   93.52    8.11
   0  -6   3   79.89    8.05
   0  -6   3   92.12    8.17
   0  -6   3   94.04    8.20
   0  -6   3  100.27    8.25
   0   6   3   94.54    8.11
   0  -6   3  124.42    9.27
   0  -6  -3  103.79    8.94
   0   6  -3  116.14    9.55
   0   6   4    2.75    1.13
   0  -6   4    3.82    1.38
   0  -6   4    2.14    1.29
   0   6   4    1.85    1.09
   0   6  -4    4.00    1.94
   0  -6   4    4.27    1.82
   0   6   5   86.11    8.83
   0  -6   5   95.42    9.20
   0  -6   5   98.92    9.26
   0   6   5   88.65    8.91
   0  -6   5  112.39   10.05
   0  -6   5  107.88    9.41
   0  -6  -5  106.68    9.57
   0   6  -5  107.73    9.79
   0   6   6  523.15   42.84
   0  -6   6  547.56   43.21
   0   6   6  511.19   42.83
   0  -6   6  491.59   43.01
   0  -6   6  528.58   42.86
   0  -6  -6  582.14   43.47
   0   6   7   11.32    2.63
   0  -6   7   12.30    2.90
   0   6   7    9.92    2.51
   0  -6   7   12.02    2.87
   0  -6  -7   15.74    3.27
   0  -6   7    9.22    2.31
   0  -6   8  126.23   13.74
   0   6   8  150.91   13.89
   0  -6   8  145.48   14.12
   0   6   8  142.73   13.79
   0  -6  -8  160.42   14.21
   0  -6   8  156.18   14.61
   0  -6   8  145.91   13.23
   0  -6   9  204.00   19.19
   0   6   9  187.57   18.78
   0   6  -9  209.42   19.05
   0  -6   9  195.18   17.89
   0  -6   9  203.36   19.44
   0  -6  -9  215.82   19.32
   0  -6   9  220.05   19.46
   0   6   9  231.59   19.41
   0   6 -10   20.02    5.24
   0   6 -10   27.10    4.73
   0  -6  10   21.87    3.57
   0  -6 -10   29.29    5.04
   0   6  10   30.03    5.22
   0  -6  10   27.85    5.17
   0   6  10   25.50    4.74
   0  -6  10   15.40    4.41
   0  -6  10   22.62    4.92
   0  -6  10   23.96    3.70
   0   6  10   22.33    3.54
   0  -6  10   26.16    5.11
   0   6  10   26.33    4.81
   0   6  11    8.17    3.18
   0  -6  11   12.17    3.76
   0  -6 -11    6.46    2.29
   0  -6  11   10.57    2.06
   0   6  11    2.36    3.11
   0   6  11   12.54    3.78
   0  -6  11    6.76    2.97
   0  -6  11    7.14    3.22
   0  -6  11   12.81    3.80
   0  -6  11    7.79    3.25
   0   6  11    8.58    2.34
   0  -6  11    4.58    2.05
   0  -6  11    8.26    2.42
   0   6  11    7.72    1.84
   0   6  11    5.86    2.13
   0   6 -11   13.36    3.55
   0  -6 -11   10.54    3.42
   0  -6  12   74.17    9.77
   0   6  12   76.85    9.84
   0  -6  12   75.25    7.57
   0  -6 -12   61.14    7.49
   0  -6  12   70.59    7.12
   0  -6 -12   92.03   10.10
   0  -6  12   76.25    9.79
   0   6 -12   68.44    9.01
   0   6  12   84.87    8.02
   0  -6  12   66.61    7.66
   0  -6  12   69.86    7.86
   0   6  12   65.86    7.08
   0   6  12   65.59    7.74
   0  -6  12   98.75   10.69
   0  -6  12   64.47    9.91
   0   6  12   72.34    9.71
   0   6  12   63.57    9.37
   0   6  12   85.12   10.44
   0  -6  12   59.70    9.25
   0  -6  13    6.49    3.76
   0   6  13   12.72    4.17
   0  -6  13    4.66    3.35
   0   6  13    7.47    3.68
   0   6  13   11.29    3.81
   0  -6  13    6.77    3.47
   0   6 -13    7.05    3.11
   0  -6 -13    7.73    3.30
   0   6 -13    8.60    3.36
   0  -6  13   12.59    2.91
   0  -6  13   11.64    2.34
   0  -6  13    6.35    3.26
   0   6  13   11.56    3.06
   0  -6  13    6.00    2.67
   0   6  13   16.12    3.37
   0   6  13    7.84    2.00
   0  -6  13   12.86    3.07
   0   6  13    6.57    3.70
   0  -6  13    4.70    3.13
   0   6  14  247.69   25.45
   0  -6  14  270.30   25.90
   0   6  14  245.99   22.65
   0  -6  14  236.38   22.64
   0  -6 -14  249.54   24.63
   0   6  14  269.41   25.74
   0  -6  14  248.28   25.58
   0   6 -14  249.55   24.20
   0   6  14  261.06   25.86
   0  -6  14  236.03   25.36
   0  -6  14  226.14   25.05
   0   6  14  243.46   25.36
   0  -6  14  289.73   22.56
   0  -6  14  254.97   21.72
   0   6  14  265.18   21.49
   0  -6  14  274.70   23.00
   0   6  14  276.99   22.94
   0  -6 -14  287.01   23.57
   0  -6  14  282.74   23.13
   0   6  14  255.51   22.93
   0   6  14  266.00   21.95
   0   6 -14  223.02   24.14
   0  -6  14  219.27   24.70
   0  -6 -14  286.68   25.61
   0  -6  15   46.48    8.01
   0   6  15   44.38    7.89
   0   6  15   50.72    6.38
   0  -6  15   45.84    6.16
   0   6  15   41.41    7.96
   0  -6 -15   47.79    7.72
   0  -6  15   40.29    7.87
   0  -6  15   35.62    7.50
   0   6 -15   33.66    6.52
   0  -6  15   42.67    7.97
   0   6  15   43.18    8.29
   0   6  15   38.87    7.60
   0  -6  15   53.32    6.02
   0   6  15   44.29    4.68
   0  -6  15   39.29    4.78
   0  -6 -15   48.81    6.63
   0  -6 -15   47.16    8.05
   0   6 -15   35.54    6.72
   0  -6 -15   44.42    5.63
   0  -6  15   54.23    6.52
   0   6  15   42.32    5.06
   0   6  15   52.47    6.42
   0   6  15   50.30    6.34
   0  -6  15   57.45    6.62
   0  -6  15   33.58    7.00
   0  -6  16  290.10   23.74
   0  -6  16  310.99   24.41
   0   6  16  265.24   24.01
   0  -6 -16  277.46   24.24
   0   6 -16  230.36   23.64
   0  -6 -16  305.93   24.82
   0   6  16  269.70   24.24
   0   6  16  253.17   22.81
   0  -6 -16  303.19   23.90
   0  -6  16  307.27   24.57
   0  -6  16  252.84   24.32
   0  -6  16  272.94   24.17
   0   6  16  278.61   24.45
   0   6  16  285.07   24.18
   0   6 -17    1.77    2.20
   0  -6  17    1.41    2.27
   0  -6  17   -0.88    2.52
   0   6 -17    1.26    2.71
   0   6  17    3.05    2.45
   0  -6 -17    1.87    2.77
   0  -6 -17    0.49    2.21
   0  -6  17   -3.37    2.64
   0   6  17   -0.95    2.53
   0  -6 -17    0.73    1.74
   0  -6  17   -0.87    2.57
   0   6  17   -0.49    2.10
   0   6  17    1.30    2.41
   0  -6  17    0.98    2.31
   0  -6  18   19.57    3.19
   0   6 -18   23.12    3.62
   0  -6  18   17.38    3.62
   0  -6 -18   16.06    3.73
   0   6 -18   14.00    3.46
   0   6  18   19.49    3.48
   0  -6 -18   19.20    3.46
   0  -6  18   20.39    3.67
   0  -6 -18   14.64    2.85
   0   6  18   21.79    3.63
   0   6  18   14.54    3.35
   0  -6  18   15.70    3.47
   0   6  18   10.48    3.12
   0  -6  18   11.84    3.27
   0  -6  19    1.40    1.57
   0   6 -19    2.08    1.61
   0  -6  19    0.31    1.97
   0   6  19    4.66    1.98
   0  -6 -19    2.29    2.38
   0   6 -19    2.03    2.11
   0   6  19    4.40    2.23
   0  -6 -19    5.43    1.77
   0   6  19    0.32    1.66
   0  -6  19    3.70    1.88
   0  -6 -19   -1.22    1.70
   0   6  19    3.77    1.99
   0   6 -19    0.28    1.57
   0   6  19    0.32    1.53
   0  -6  19    2.31    1.88
   0  -6  19    2.94    1.84
   0   6  20    8.34    1.87
   0  -6  20   12.42    1.78
   0   6 -20   13.70    2.07
   0   6  20   11.78    2.33
   0  -6 -20    9.98    1.71
   0  -6 -20   14.26    2.28
   0   6 -20    6.07    1.82
   0   6  20    3.18    1.24
   0  -6  20   10.67    1.89
   0   6  20    7.75    1.71
   0  -6  20    8.37    1.79
   0   7   0    3.05    2.32
   0  -7   0    0.28    1.60
   0  -7  -1  285.28   25.64
   0  -7   1  349.80   26.67
   0  -7  -1  329.28   26.54
   0   7  -1  337.56   27.15
   0   7   1  357.62   27.33
   0  -7  -2   70.57    6.31
   0   7  -2   66.61    6.73
   0  -7  -2   51.43    4.96
   0   7   2   66.37    6.85
   0   7  -3  975.72   60.17
   0  -7  -3  900.68   59.31
   0  -7   3 1031.88   59.66
   0  -7   3  759.64   57.96
   0   7   3  760.10   57.89
   0  -7  -3  778.62   57.88
   0  -7   3  690.03   57.89
   0   7   3  599.93   57.79
   0   7   3  740.60   57.92
   0  -7   3  755.77   57.89
   0  -7   3  652.80   57.83
   0   7  -3  730.71   57.75
   0   7  -4  326.74   22.58
   0  -7   4  307.85   22.34
   0  -7   4  303.00   21.82
   0  -7   4  248.80   20.81
   0   7   4  263.18   20.77
   0   7  -4  257.30   20.56
   0   7   4  234.62   20.65
   0  -7   4  238.64   20.75
   0   7   4  233.94   20.70
   0  -7   4  215.22   20.62
   0  -7   4  281.34   20.95
   0   7   4  244.25   20.72
   0  -7  -5 1165.48   76.20
   0  -7   5 1143.17   75.88
   0  -7   5 1096.03   76.47
   0   7  -5 1035.90   76.22
   0   7   5  917.26   74.90
   0  -7   5  937.55   75.13
   0  -7   5  859.44   74.96
   0   7   5  899.38   74.84
   0  -7   5 1055.62   75.32
   0   7   5  857.00   74.95
   0  -7   5  833.88   75.00
   0   7   5  872.27   74.89
   0  -7   6   86.32    8.97
   0   7  -6   89.62    8.92
   0  -7   6   87.80    8.32
   0  -7  -6   93.94    8.71
   0   7   6   67.47    7.67
   0  -7   6   81.71    8.25
   0   7   6   77.70    7.85
   0  -7   6   79.46    8.13
   0   7   6   78.49    7.94
   0  -7   6   70.74    8.00
   0  -7  -7   38.60    5.21
   0  -7   7   34.65    4.79
   0  -7   7   39.72    5.26
   0   7   7   42.29    4.98
   0  -7   7   39.69    5.12
   0  -7   7   28.86    4.94
   0   7   7   30.97    4.68
   0   7   7   38.72    4.76
   0  -7   8  101.97    9.46
   0   7   8   81.58    9.28
   0   7   8   84.86    9.54
   0  -7   8   82.75    9.60
   0  -7   8   78.83    9.80
   0   7   8   87.44    8.30
   0   7  -8   86.95    8.38
   0  -7   8  103.43   10.16
   0   7   8   96.59    9.58
   0  -7  -9   19.43    3.88
   0   7  -9   17.63    3.83
   0  -7   9   14.99    3.08
   0  -7   9   16.92    2.81
   0  -7   9    8.86    3.29
   0   7   9   14.57    3.43
   0  -7   9   18.41    3.83
   0  -7   9   13.10    3.74
   0   7   9   12.09    3.26
   0  -7   9   27.61    4.98
   0   7   9   12.01    2.26
   0   7  -9   12.91    2.41
   0  -7   9   14.10    2.66
   0  -7   9   18.01    3.90
   0   7   9   12.45    3.21
   0   7  10   12.06    3.44
   0  -7  10   17.85    4.12
   0  -7 -10   11.30    2.88
   0  -7  10   13.99    2.77
   0  -7  10   10.91    2.40
   0  -7  10   15.62    3.92
   0   7  10   12.84    3.68
   0   7  10   14.54    3.82
   0  -7  10    9.23    3.31
   0  -7  10   12.18    3.64
   0   7  10   18.75    3.98
   0  -7  10   10.67    3.60
   0  -7  10   16.02    2.78
   0   7  10   15.12    2.48
   0   7 -10   14.83    3.74
   0  -7  10   17.99    3.26
   0  -7 -10   17.19    4.12
   0  -7  11   39.53    6.67
   0   7  11   39.54    6.45
   0  -7 -11   43.30    5.40
   0  -7  11   37.22    4.70
   0   7  11   37.06    6.41
   0  -7  11   25.95    5.89
   0  -7  11   42.26    6.66
   0  -7  11   24.86    6.06
   0   7  11   36.38    6.27
   0   7  11   36.20    6.23
   0  -7  11   39.81    5.14
   0  -7  11   41.64    6.88
   0   7  11   38.61    4.94
   0   7  11   41.37    5.05
   0  -7 -11   51.50    5.33
   0   7  11   42.44    4.67
   0  -7  11   40.97    5.20
   0   7 -11   37.71    6.35
   0  -7 -11   49.79    6.88
   0  -7  12   94.90   11.78
   0   7  12   91.21   11.53
   0  -7 -12   82.77    9.52
   0  -7  12   93.94    9.05
   0  -7  12   82.52   11.31
   0  -7 -12   93.83   11.44
   0   7 -12   89.13   11.21
   0  -7  12   95.48    9.62
   0   7  12   95.77    9.52
   0  -7 -12  120.20    9.88
   0  -7  12  117.20   10.10
   0   7  12  106.31    9.24
   0   7  12  104.46    9.81
   0   7  12   78.25   11.08
   0  -7  12   88.38   11.56
   0   7 -12   77.00   10.28
   0  -7  12   98.98   11.86
   0   7  12   89.37   11.39
   0  -7  12   82.53   11.39
   0   7  12   79.84   11.16
   0  -7 -12   87.85   10.77
   0   7  13  161.94   16.62
   0  -7 -13  120.61   15.11
   0  -7  13  141.64   16.54
   0   7  13  119.83   15.73
   0   7 -13  114.65   14.87
   0  -7  13  115.97   15.68
   0  -7  13  149.77   16.62
   0   7  13  133.33   15.98
   0  -7  13  153.64   13.40
   0  -7  13  142.32   16.29
   0  -7 -13  173.91   16.73
   0   7 -13  129.64   15.64
   0  -7  13  167.61   14.31
   0   7  13  169.95   14.25
   0  -7 -13  172.34   14.14
   0  -7  13  171.91   14.53
   0   7  13  128.01   13.82
   0   7  13  172.19   13.64
   0  -7  13  139.69   16.32
   0  -7  13  146.10   13.98
   0   7  13  158.17   14.10
   0   7  13  155.79   16.49
   0   7  14   27.42    5.85
   0   7  14   27.34    5.65
   0  -7 -14   22.29    5.00
   0  -7  14   27.90    5.98
   0  -7  14   17.45    5.16
   0   7 -14   14.43    4.07
   0  -7 -14   28.00    5.77
   0   7 -14   16.80    4.76
   0   7  14   25.53    3.10
   0  -7  14   23.16    3.47
   0  -7  14   29.07    4.31
   0   7  14   27.41    4.42
   0  -7  14   25.78    5.81
   0  -7  14   29.11    4.53
   0   7  14   20.57    4.11
   0   7  14   23.20    3.44
   0  -7  14   23.49    4.26
   0   7  14   25.56    4.25
   0   7  14   30.38    6.24
   0  -7  14   16.11    4.98
   0  -7  14   19.87    4.10
   0  -7  15   88.25    8.47
   0  -7  15   65.52    7.21
   0  -7 -15   71.13    8.42
   0   7 -15   54.76    7.84
   0   7  15   87.20    8.62
   0  -7  15   81.31    8.62
   0  -7 -15   84.38    9.13
   0  -7  15   96.32    9.01
   0   7  15   66.86    8.26
   0   7  15   72.58    7.41
   0  -7  15   69.20    8.43
   0   7  15   79.75    8.69
   0  -7  15   83.51    8.72
   0   7  15   66.72    8.18
   0   7 -16    8.28    2.70
   0  -7  16    1.58    2.35
   0  -7  16    0.45    2.38
   0   7  16   -0.87    2.42
   0   7 -16    4.69    2.75
   0  -7 -16    2.31    2.88
   0  -7 -16    0.56    2.48
   0   7  16    1.01    1.16
   0  -7  16    1.48    2.23
   0   7  16    5.23    2.72
   0   7  16    4.91    2.53
   0   7  16    3.92    2.53
   0  -7  16    3.53    2.46
   0  -7  16    1.78    2.47
   0  -7  17    1.08    2.03
   0   7 -17    0.38    1.72
   0   7 -17   -1.68    2.08
   0  -7  17   -2.49    2.58
   0   7  17   -1.57    2.39
   0   7 -17   -2.72    2.48
   0  -7 -17   -0.43    2.66
   0  -7 -17    0.50    2.29
   0   7  17   -1.29    2.10
   0  -7 -17   -2.17    2.23
   0  -7  17   -0.45    2.09
   0   7  17    0.44    1.90
   0  -7  17   -0.40    2.39
   0   7  17   -1.18    2.30
   0  -7  17    1.37    2.23
   0  -7  18   34.59    4.04
   0   7 -18   40.98    4.40
   0   7 -18   31.75    4.21
   0   7  18   41.52    4.37
   0  -7  18   42.60    4.65
   0  -7 -18   43.88    4.82
   0  -7 -18   42.89    4.63
   0  -7  18   32.02    4.24
   0   7  18   44.58    4.51
   0  -7 -18   49.95    4.33
   0  -7  18   44.15    4.71
   0  -7 -18    1.34    2.54
   0   7  18   47.18    4.75
   0   7  18   27.16    4.00
   0  -7  18   27.82    4.06
   0   7 -18    1.25    2.39
   0   7  19   21.72    2.56
   0  -7  19   85.18    4.44
   0   7 -19   81.86    4.70
   0  -7  19   71.73    4.40
   0   7 -19   58.08    3.93
   0  -7 -19   82.89    4.39
   0   7  19   65.82    4.41
   0  -7  20    0.97    1.15
   0   7 -20    1.78    1.06
   0   7  20    0.88    1.28
   0  -7 -20    0.64    0.86
   0   7  20    0.74    0.96
   0  -8   0  148.78   13.30
   0  -8   0  137.24   12.60
   0   8   0  161.38   14.09
   0  -8  -1  247.77   21.14
   0  -8   1  242.57   20.76
   0   8   1  266.07   21.95
   0  -8   1  283.86   21.41
   0  -8  -1  221.88   20.08
   0   8  -1  262.73   21.95
   0   8  -2   23.04    3.99
   0  -8  -2   19.42    3.46
   0  -8  -2   16.13    2.06
   0   8   2   24.08    4.06
   0  -8   2   22.35    3.29
   0  -8   3  584.35   49.18
   0  -8   3  635.87   49.27
   0   8  -3  627.23   49.89
   0  -8  -3  578.61   49.03
   0   8   4    2.82    1.11
   0  -8   4    2.43    1.02
   0   8  -4    1.33    0.99
   0  -8   4    1.86    1.02
   0   8   4    2.39    1.03
   0  -8   4    4.33    2.27
   0   8  -4    2.94    2.12
   0  -8   4    2.69    2.20
   0  -8   5  633.23   50.20
   0   8  -5  652.98   49.87
   0   8   5  575.58   50.02
   0  -8   5  477.10   49.84
   0   8   5  616.76   50.08
   0  -8   5  732.51   51.93
   0  -8   5  727.74   51.37
   0   8  -5  734.48   52.18
   0  -8  -5  794.39   51.77
   0  -8   6   98.72    9.58
   0   8   6   92.07    9.37
   0  -8   6   83.95    9.35
   0   8  -6   98.90    9.14
   0   8   6   88.43    9.31
   0  -8   6   95.69    9.57
   0   8   6   93.51    9.34
   0  -8   6  130.58   10.57
   0  -8   6  120.37   11.09
   0   8  -6  104.11   10.74
   0  -8  -6  126.79   10.79
   0   8   7    9.86    2.54
   0  -8   7   13.57    2.87
   0  -8   7   10.85    2.78
   0  -8   7   12.47    2.94
   0   8   7   10.11    2.58
   0   8   7    9.89    2.41
   0   8  -7   10.21    2.22
   0  -8   7   20.58    3.51
   0  -8   7   14.59    3.91
   0   8  -7   18.00    3.98
   0  -8  -7   18.42    3.66
   0   8   7   13.34    2.18
   0  -8  -7   11.47    2.38
   0  -8   7   16.45    3.12
   0   8   7   13.13    2.68
   0   8   8  193.33   18.47
   0  -8   8  207.81   19.01
   0  -8   8  210.24   17.80
   0   8  -8  193.01   18.08
   0   8   8  203.06   18.55
   0   8   8  193.49   18.44
   0  -8   8  206.18   19.09
   0   8   8  172.71   18.31
   0  -8   8  193.23   18.76
   0  -8   8  183.24   18.64
   0   8  -8  198.82   17.52
   0   8   8  230.25   17.68
   0  -8  -8  236.79   18.01
   0  -8  -8  246.26   19.89
   0  -8   8  243.58   18.99
   0   8   9  105.29   11.02
   0  -8   9  106.23   11.53
   0  -8  -9  114.04   10.49
   0  -8   9  100.41   10.01
   0   8  -9  124.43   10.81
   0  -8   9  118.32   10.05
   0  -8   9   96.06   11.25
   0   8   9   91.40   10.74
   0   8   9   98.86   10.88
   0   8  -9   97.85   10.43
   0  -8   9   84.86   10.97
   0  -8   9   98.06   11.21
   0   8   9   96.54   10.89
   0   8  -9   97.13    9.65
   0   8   9  110.03    9.77
   0  -8  -9  119.92   10.29
   0  -8   9  108.75   10.77
   0  -8  -9  139.15   12.32
   0  -8  10    1.40    1.97
   0   8  10   -0.62    2.03
   0  -8 -10    0.41    1.90
   0  -8  10   -1.75    1.97
   0   8 -10   -0.43    1.63
   0  -8  10    1.83    1.57
   0  -8  10   -0.24    1.11
   0  -8 -10    1.13    1.92
   0   8  10   -0.63    1.87
   0   8  10    0.65    1.84
   0  -8  10   -0.69    1.95
   0   8 -10    0.50    1.40
   0  -8  10   -0.72    2.23
   0  -8  10    2.46    2.88
   0  -8 -10    1.07    1.83
   0   8  10    0.57    1.11
   0  -8 -10    0.70    2.07
   0   8 -10    2.27    2.56
   0  -8  10    1.37    1.71
   0   8  11   25.68    5.26
   0  -8 -11   35.62    4.86
   0  -8  11   25.95    3.85
   0  -8  11   34.23    4.59
   0   8 -11   25.12    4.31
   0   8 -11   17.63    4.30
   0  -8  11   24.80    5.20
   0  -8  11   25.54    5.53
   0  -8 -11   31.73    5.24
   0   8  11   28.80    5.34
   0  -8  11   22.19    5.39
   0  -8 -11   28.84    4.21
   0  -8  11   26.36    4.13
   0   8  11   34.12    3.97
   0   8 -11   32.86    5.77
   0  -8 -11   30.72    5.59
   0   8  12   20.79    4.66
   0   8  12   15.30    3.16
   0  -8 -12   17.00    3.78
   0  -8  12   15.58    3.13
   0   8 -12   16.05    3.55
   0   8 -12   17.68    4.69
   0  -8 -12   24.04    5.06
   0   8  12   20.87    3.49
   0  -8  12   16.07    4.57
   0   8  12   22.87    3.24
   0  -8 -12   25.07    3.76
   0  -8  12   19.16    3.54
   0   8  12   12.90    3.82
   0  -8  12   14.49    4.32
   0  -8  12   14.07    4.36
   0   8 -12   18.50    4.22
   0  -8  13   33.29    6.59
   0   8 -13   26.97    5.96
   0  -8 -13   36.38    6.36
   0   8  13   37.21    4.79
   0  -8  13   34.65    6.68
   0   8 -13   34.53    5.05
   0  -8  13   27.58    4.10
   0  -8 -13   30.42    4.53
   0   8  13   31.09    4.08
   0  -8  13   37.54    5.06
   0   8  13   29.38    4.48
   0  -8  13   21.38    4.68
   0   8  13   29.40    4.61
   0   8 -14   65.85   10.06
   0  -8 -14  111.53   11.82
   0   8 -14   97.53    9.11
   0  -8  14   83.75    7.95
   0  -8 -14   69.35    8.39
   0   8 -14   57.69    8.05
   0   8  14   76.34    8.37
   0  -8  14   84.19    8.72
   0  -8  14   65.90   10.33
   0  -8  14   75.56    8.61
   0   8  14   92.60    8.02
   0  -8 -14   76.99    8.31
   0   8  14   83.61    8.70
   0  -8  14   51.09    8.27
   0   8  14   85.62    8.55
   0  -8  15  229.66   20.10
   0   8 -15  292.56   21.74
   0  -8  15  261.44   21.26
   0   8 -15  215.36   20.76
   0  -8 -15  236.23   20.98
   0   8  15  242.74   20.91
   0  -8 -15  286.38   22.34
   0   8  15  232.56   20.13
   0  -8  15  277.42   21.60
   0  -8 -15  259.32   21.04
   0  -8  15  178.93   20.61
   0   8  15  241.53   20.91
   0   8  15  208.87   20.82
   0  -8  16    9.69    2.83
   0   8 -16    7.02    2.55
   0  -8  16    5.57    1.78
   0  -8  16    5.04    2.91
   0  -8 -16    6.16    2.87
   0   8 -16    3.90    2.78
   0   8  16    8.05    2.71
   0  -8 -16    8.34    3.08
   0   8  16    7.58    1.75
   0  -8  16    4.12    2.59
   0   8  16    6.07    2.59
   0   8  16   10.03    2.70
   0  -8  16    0.46    2.47
   0   8 -17    3.55    2.19
   0  -8  17    3.26    2.48
   0   8 -17    2.71    2.06
   0   8  17    2.98    1.89
   0  -8 -17    3.62    2.36
   0  -8  17    1.47    2.08
   0  -8 -17    3.89    2.59
   0  -8  17    0.81    1.67
   0   8 -17   -0.65    1.34
   0   8  17    3.66    2.25
   0  -8  17   -0.39    1.23
   0   8  18    4.59    2.02
   0   8 -18   12.21    2.63
   0  -8  18    9.48    2.47
   0  -8 -18   -0.83    1.10
   0  -8 -18    9.48    2.67
   0  -8  18    0.64    0.73
   0  -8 -18   10.79    2.36
   0   8 -18    0.25    0.63
   0   8  18   -0.50    0.92
   0  -8 -19   21.59    2.76
   0   8  19   11.80    2.43
   0   8 -19   19.38    2.75
   0  -8  19   16.79    2.71
   0  -8  20    1.65    1.16
   0  -8  20    1.95    0.92
   0   8 -20    0.84    0.78
   0  -9   0    0.83    2.13
   0   9   0    1.10    2.06
   0  -9   0   -0.27    1.14
   0  -9  -1 1922.72  141.05
   0   9  -1 1922.88  142.05
   0  -9   1 1739.39  140.35
   0  -9  -1 1569.90  139.47
   0  -9   1 2049.12  141.28
   0   9   1 1916.56  141.78
   0   9  -2  201.91   17.75
   0  -9  -2  190.01   16.73
   0  -9   2  168.85   16.30
   0  -9   3   48.67    6.00
   0  -9   3   46.97    5.94
   0   9  -3   45.07    6.52
   0  -9  -3   45.33    5.76
   0   9  -4    2.38    2.10
   0  -9   4    4.55    2.42
   0  -9   4    0.98    1.90
   0  -9   5  394.35   29.70
   0   9  -5  340.63   30.08
   0  -9   5  368.37   29.95
   0  -9  -5  346.18   29.39
   0   9   5  313.69   27.89
   0   9  -6   77.74    8.15
   0  -9  -6   95.99    8.47
   0   9   6   82.68    8.16
   0   9  -6   85.16   10.06
   0   9   6   94.38    8.71
   0  -9   6   84.58    9.50
   0  -9   6   99.80   10.33
   0  -9  -6  102.31    9.89
   0  -9   7   41.39    5.17
   0   9  -7   54.03    5.94
   0  -9   7   47.76    5.31
   0   9  -7   38.27    4.87
   0  -9  -7   53.88    5.40
   0   9  -7   42.84    5.20
   0   9   7   46.22    5.00
   0  -9  -7   56.61    6.69
   0  -9   7   45.28    6.15
   0  -9   7   54.85    7.18
   0   9  -7   42.71    6.61
   0  -9  -8   12.02    2.81
   0   9  -8    9.09    2.61
   0  -9   8    6.60    1.84
   0  -9   8    9.60    2.33
   0  -9   8   11.80    2.69
   0  -9   8    9.60    3.49
   0  -9  -8   11.35    2.36
   0   9   8   14.98    2.43
   0   9  -8    8.11    1.99
   0  -9  -8    9.61    2.27
   0  -9  -8   16.63    3.83
   0   9  -8   13.11    3.64
   0  -9   8   10.34    2.86
   0  -9  -9    0.81    1.83
   0   9   9    0.88    1.27
   0   9  -9   -0.29    1.14
   0  -9  -9    2.45    1.83
   0  -9   9    1.04    1.96
   0  -9  -9    2.03    2.46
   0  -9   9   -1.63    1.87
   0  -9   9    1.46    1.31
   0  -9   9    0.36    1.85
   0   9  -9    3.50    2.10
   0  -9 -10   -0.45    2.03
   0  -9  10   -0.34    1.59
   0   9 -10    1.38    1.83
   0  -9  10    0.25    1.26
   0  -9  10   -1.56    2.17
   0   9  10   -0.62    1.36
   0  -9 -10    1.88    1.84
   0  -9  10   -0.52    1.69
   0  -9 -10    2.95    2.77
   0  -9 -11    9.20    3.05
   0  -9  11    9.40    3.59
   0  -9 -11    9.91    2.68
   0   9  11    8.37    2.17
   0  -9 -11    5.59    2.78
   0   9 -11    5.51    3.51
   0   9 -11   10.49    2.90
   0  -9  11    5.38    2.71
   0  -9  11    8.71    2.55
   0  -9  12   72.63    8.53
   0  -9 -12   82.23    9.02
   0   9  12   80.94    7.99
   0  -9 -12   96.70    8.73
   0  -9 -12   83.00   10.45
   0   9 -12   56.46    9.80
   0  -9  12   79.00   10.96
   0  -9  12   72.62    8.06
   0   9 -12   89.70    8.95
   0  -9 -13   88.12   11.00
   0  -9  13  121.58   11.45
   0  -9  13  110.50   10.74
   0   9 -13  120.32   11.65
   0  -9 -13  103.98   13.09
   0  -9  13  101.99   13.56
   0   9 -13  108.44   13.81
   0   9  13  127.36   10.81
   0  -9 -13  124.77   11.28
   0   9  14   70.93    7.82
   0  -9 -14   96.48    8.90
   0   9 -14   93.37    9.13
   0  -9  14   74.64    8.07
   0  -9 -15    3.22    2.17
   0   9  15    0.28    1.06
   0  -9 -15    2.31    2.77
   0   9 -15   -0.45    1.94
   0  -9  15   -0.29    1.52
   0  -9 -16  240.32   19.70
   0   9 -16  243.96   19.07
   0  -9  16  171.44   17.50
   0   9  16  201.29   17.61
   0  -9 -16  241.10   18.76
   0   9  16  240.49   19.27
   0   9  17    5.85    2.33
   0   9 -17    5.65    2.36
   0   9 -17    9.52    2.61
   0  -9  17    9.50    2.84
   0  -9 -17    7.80    3.10
   0   9  18   10.81    2.51
   0  -9  18   11.46    2.79
   0   9 -18   21.36    3.05
   0  -9 -18   19.46    3.15
   0   9  18   14.37    2.90
   0  -9  19    0.94    1.32
   0   9 -19    0.61    1.14
   0   9  19    2.25    1.45
   0  -9  19    2.17    1.70
   0   9  19    1.41    1.03
   0  10   0  413.21   36.90
   0 -10   0  462.42   36.49
   0 -10   0  420.55   35.13
   0 -10  -1    4.40    1.33
   0 -10   1    8.44    2.25
   0 -10   1   10.44    3.09
   0  10  -1    4.71    3.00
   0 -10  -1    5.96    2.72
   0  10   1    5.49    2.90
   0  10   1    5.25    1.41
   0  10  -2   43.23    6.76
   0 -10  -2   45.65    6.12
   0 -10   2   41.91    5.49
   0  10   2   41.68    4.55
   0 -10   3  601.60   44.08
   0  10  -3  531.09   44.84
   0 -10  -3  551.42   43.80
   0 -10   3  563.93   43.80
   0  10   3  514.07   42.07
   0  10  -3  472.50   42.11
   0 -10   4   31.73    5.17
   0  10  -4   38.90    6.00
   0 -10   4   35.30    5.32
   0  10  -4   29.17    3.94
   0  10  -5  959.95   80.51
   0  10  -5 1029.29   80.86
   0 -10  -5  912.75   80.37
   0 -10   5 1042.64   82.57
   0 -10  -5 1052.71   82.16
   0 -10   5 1168.58   82.62
   0  10  -5 1023.48   83.26
   0  10   5 1095.11   80.91
   0 -10  -6    0.33    1.47
   0  10   6    0.40    1.63
   0 -10   6    0.96    1.57
   0  10  -6    0.84    1.68
   0 -10   6    3.36    2.61
   0 -10  -6    3.42    1.63
   0  10   6    2.19    1.24
   0  10  -6    1.66    1.33
   0  10  -6    0.92    1.07
   0  10  -6    1.52    2.76
   0  10   6    0.98    1.41
   0 -10   6    2.30    2.36
   0 -10  -6    1.12    1.83
   0  10  -6    2.02    1.59
   0 -10  -7  747.04   59.14
   0 -10   7  696.84   58.88
   0  10  -7  825.28   59.87
   0 -10   7  584.11   58.09
   0 -10  -7  713.30   58.58
   0  10  -7  695.85   58.57
   0 -10  -7  731.73   58.80
   0  10  -7  823.24   59.28
   0  10   7  801.57   58.81
   0 -10   7  727.46   61.27
   0  10  -7  743.41   61.64
   0 -10   7  759.89   60.41
   0  10   7  828.62   59.33
   0 -10  -7  832.75   61.01
   0 -10  -8   12.26    2.83
   0 -10   8    8.72    2.40
   0 -10   8    6.34    2.46
   0  10  -8    3.64    2.20
   0 -10   8    8.07    1.95
   0 -10   8    4.01    2.97
   0 -10  -8    7.03    2.06
   0  10  -8    8.24    2.02
   0  10   8    5.14    1.71
   0 -10  -8    7.91    2.32
   0 -10  -8    6.63    2.76
   0 -10   8    4.16    2.67
   0  10  -8    5.08    3.41
   0  10   8    5.33    2.06
   0 -10  -9  298.06   25.96
   0 -10   9  309.20   25.83
   0  10  -9  292.33   25.18
   0 -10  -9  306.13   25.59
   0  10   9  307.46   25.27
   0  10  -9  256.43   27.76
   0 -10   9  303.99   26.81
   0  10   9  337.53   26.15
   0 -10   9  292.19   27.99
   0 -10  -9  339.19   27.94
   0 -10   9  261.51   24.80
   0  10  -9  333.02   26.47
   0 -10   9  316.69   25.62
   0 -10 -10  131.56   12.81
   0 -10  10  141.03   12.68
   0  10  10  130.44   11.83
   0 -10 -10  138.99   12.30
   0 -10 -10  141.85   14.50
   0 -10  10  124.26   14.70
   0 -10  10  133.42   13.25
   0  10 -10  154.43   13.19
   0 -10  10  103.81   11.33
   0 -10  10  121.03   12.05
   0 -10  11  792.53   58.70
   0 -10 -11  744.01   58.92
   0 -10 -11  801.66   58.46
   0  10  11  753.32   57.84
   0 -10 -11  773.24   60.85
   0  10 -11  598.49   60.69
   0 -10  11  585.89   57.12
   0 -10  11  735.30   58.08
   0  10 -11  803.46   59.09
   0 -10  12  105.50   10.47
   0 -10 -12  102.42   10.66
   0 -10 -12  107.85   10.16
   0  10  12  102.88    9.60
   0 -10 -12  101.41   11.98
   0  10 -12   77.69   11.96
   0  10 -12  100.45   10.49
   0 -10  12   87.16    9.59
   0 -10 -13  155.95   16.79
   0 -10  13  188.99   17.05
   0 -10  13  178.78   16.39
   0  10 -13  196.99   17.30
   0 -10 -13  195.93   19.42
   0  10  13  217.52   17.65
   0  10 -13  144.99   19.06
   0  10  13  187.91   16.23
   0 -10 -13  195.61   16.84
   0 -10  14   29.51    4.27
   0  10 -14   35.56    5.12
   0 -10  14   28.15    5.03
   0 -10 -14   37.13    4.89
   0  10  14   35.27    4.27
   0  10  14   30.28    5.16
   0 -10 -15    7.22    3.09
   0 -10  15    1.75    1.72
   0  10 -15    4.72    2.29
   0  10  15    1.59    1.33
   0 -10 -15    1.94    2.29
   0  10  15   -1.37    1.97
   0 -10 -16   22.03    4.06
   0  10 -16   14.64    3.20
   0  10 -16   20.37    3.73
   0 -10  16   11.42    2.32
   0 -10 -16   15.12    3.11
   0  10  16   12.20    2.11
   0  10  16   15.86    3.25
   0 -10 -17  390.18   31.56
   0  10 -17  332.11   30.89
   0  10 -17  397.40   31.12
   0 -10 -17  406.86   31.06
   0  10  17  352.94   30.94
   0 -10  18   20.91    3.18
   0 -10 -18   20.49    3.25
   0  10  18   16.98    2.92
   0 -10  18   18.23    2.99
   0  10 -18   17.94    2.79
   0 -10 -18   22.67    3.07
   0  10  18   12.80    2.57
   0  10  19   -0.50    0.94
   0 -10  19   -0.46    1.05
   0  10 -19   -0.61    0.80
   0 -10  19    1.40    1.18
   0 -11   0   -0.32    1.13
   0  11   0    2.94    2.76
   0  11   0    0.26    1.06
   0  11   0   -0.24    0.97
   0 -11   1   11.72    2.60
   0  11  -1    6.48    1.65
   0  11   1    6.77    1.75
   0  11   1    6.36    1.65
   0  11  -1    7.78    1.90
   0 -11   1    6.42    2.95
   0  11  -1    3.92    2.61
   0 -11  -1   12.36    3.41
   0  11   1    5.51    2.72
   0 -11   2   21.15    3.81
   0  11  -2   24.39    3.12
   0  11   2   14.90    2.54
   0  11  -2   19.10    2.89
   0 -11  -2   23.20    4.59
   0  11  -2   23.07    5.24
   0 -11  -3   21.17    3.27
   0  11   3   19.93    3.27
   0 -11   3   20.97    3.99
   0  11   3   16.88    2.78
   0  11  -3   21.73    3.25
   0  11  -3   20.60    3.04
   0 -11   3   18.10    4.38
   0  11  -3   24.52    5.62
   0  11   3   23.45    3.19
   0 -11  -4   60.56    6.49
   0 -11   4   56.52    6.63
   0 -11   4   56.58    6.35
   0 -11   4   45.04    5.77
   0  11   4   76.39    7.05
   0  11  -4   66.69    7.05
   0  11  -4   56.08    6.35
   0 -11  -4   60.34    6.28
   0  11  -4   58.97    6.39
   0  11   4   64.04    6.22
   0  11   4   62.83    6.39
   0 -11   4   85.53    8.68
   0  11  -4   82.37    9.68
   0 -11   4   51.88    7.42
   0 -11  -5   26.22    3.98
   0 -11   5   33.37    4.40
   0 -11   5   22.96    3.37
   0 -11   5   23.11    3.78
   0  11  -5   31.86    4.50
   0 -11   5   27.89    4.15
   0  11   5   27.37    4.13
   0 -11   5   25.17    5.00
   0 -11  -5   23.19    3.52
   0  11  -5   28.22    3.84
   0  11  -5   33.95    4.22
   0 -11  -5   29.63    3.85
   0  11   5   28.31    3.88
   0 -11  -5   26.67    4.76
   0  11  -5   25.27    5.54
   0 -11   5   36.16    5.60
   0 -11   6   72.84    8.14
   0 -11  -6   82.43    8.16
   0 -11   6   68.43    8.02
   0  11  -6   85.02    7.86
   0 -11  -6   72.01    7.53
   0 -11   6   79.03    8.02
   0  11   6   91.92    8.62
   0 -11   6   62.45    7.24
   0  11  -6   86.55    8.77
   0  11  -6   93.10    8.35
   0 -11  -6   73.57    7.71
   0  11   6   75.53    7.59
   0  11  -6   62.71    7.30
   0 -11   6   88.99    9.97
   0 -11  -6   84.13    9.41
   0 -11   6   92.06    9.85
   0  11  -6   86.09   10.71
   0  11   6   84.98    8.01
   0 -11   7  252.44   22.54
   0 -11  -7  238.06   22.54
   0  11  -7  264.70   22.19
   0 -11  -7  245.68   22.00
   0 -11   7  219.73   21.69
   0  11  -7  318.79   23.63
   0 -11  -7  264.55   22.32
   0  11  -7  291.47   22.82
   0  11   7  284.85   22.32
   0 -11   7  252.53   24.58
   0 -11   7  275.37   24.27
   0 -11  -7  265.51   24.12
   0  11   7  290.11   22.69
   0  11  -7  258.43   25.50
   0 -11   8   64.43    7.46
   0 -11  -8   67.66    7.45
   0 -11   8   53.82    6.47
   0  11  -8   85.24    8.23
   0 -11  -8   62.25    6.86
   0  11  -8   70.72    7.00
   0  11   8   68.63    6.85
   0 -11  -8   59.58    7.00
   0 -11   8   52.05    7.94
   0 -11  -8   66.68    8.64
   0  11   8   77.05    7.47
   0 -11   8   67.57    9.47
   0  11  -8   54.62    9.13
   0 -11  -9   38.37    5.52
   0 -11   9   24.13    5.65
   0  11  -9   31.41    5.11
   0 -11   9   38.27    5.05
   0 -11   9   37.11    5.30
   0 -11   9   29.12    4.12
   0  11   9   40.44    4.58
   0 -11  -9   34.55    4.77
   0  11  -9   36.83    4.56
   0 -11   9   30.10    5.50
   0 -11  -9   34.77    6.05
   0  11   9   33.66    4.86
   0  11  -9   24.64    6.13
   0 -11 -10   15.25    3.74
   0 -11  10   14.74    4.53
   0  11 -10   18.58    3.57
   0 -11  10    9.32    2.48
   0 -11  10   13.19    3.62
   0 -11  10   12.50    3.12
   0 -11 -10   14.62    3.38
   0  11  10   12.35    2.61
   0  11  10   12.14    3.12
   0 -11  10    8.88    3.30
   0  11 -10   11.86    4.63
   0 -11 -10   15.12    4.01
   0 -11 -11    9.62    3.48
   0 -11  11    9.22    4.15
   0  11 -11    8.24    3.00
   0 -11  11   13.69    3.02
   0 -11  11   12.54    3.75
   0 -11  11    7.42    2.19
   0  11  11    9.27    2.35
   0 -11 -11    7.70    2.71
   0 -11 -11    9.95    3.64
   0  11  11   10.40    2.80
   0 -11  12  105.81   10.49
   0 -11 -12   87.47   10.29
   0 -11  12   66.18   11.21
   0  11  12   95.65    9.30
   0 -11 -12   96.96    9.82
   0  11 -12   74.95   12.03
   0  11  12  103.38   10.28
   0 -11 -12  114.66   12.23
   0 -11  12   99.58    9.77
   0  11 -12  104.88   10.46
   0 -11 -13   14.12    3.56
   0  11 -13   12.38    3.25
   0 -11  13   15.63    3.23
   0 -11  13   18.14    3.88
   0  11  13    9.05    2.89
   0  11  13   14.36    2.65
   0 -11 -13   15.81    3.33
   0 -11  14    8.33    3.05
   0  11 -14    3.09    2.30
   0 -11  14    7.78    2.40
   0  11  14    4.63    1.73
   0 -11 -14    1.19    1.93
   0  11  14    4.95    2.26
   0 -11 -15    3.66    2.87
   0 -11  15   -0.86    1.60
   0 -11  15   -0.81    2.49
   0  11 -15    1.59    1.83
   0  11  15    1.96    1.27
   0 -11 -15    1.85    2.00
   0  11  15    1.62    1.71
   0 -11 -16   68.06    6.32
   0 -11  16   44.87    4.12
   0  11 -16   52.15    5.61
   0  11 -16   73.48    5.59
   0 -11 -16   64.23    5.30
   0  11  16   61.72    5.31
   0 -11  17   10.12    2.57
   0  11  17    8.77    2.28
   0 -11 -17    6.94    2.43
   0  11 -17    9.81    2.20
   0  11 -17    7.80    2.26
   0 -11 -17    8.66    2.28
   0  11  17   10.09    2.11
   0  11  18    3.11    1.43
   0 -11 -18    4.19    1.57
   0 -11 -18    8.32    1.89
   0 -11  18    6.56    1.77
   0  11 -18    6.32    1.56
   0 -12   0   18.11    3.20
   0 -12   0   14.25    3.06
   0  12   0   23.10    3.50
   0  12   0   23.87    3.34
   0  12   0   19.61    3.01
   0  12   0   25.00    5.29
   0 -12   0   16.30    4.36
   0 -12   1   75.46    7.45
   0  12  -1   75.66    7.32
   0  12   1   68.66    7.18
   0 -12   1   60.51    7.20
   0  12  -1   80.31    7.71
   0  12   1   83.46    7.68
   0  12  -1   61.17    6.92
   0  12   1   70.18    7.04
   0 -12   1   77.19    9.17
   0  12  -1   75.29    9.85
   0 -12   1   68.39    7.73
   0 -12  -1   65.28    9.03
   0 -12   2  199.73   15.93
   0 -12   2  161.91   15.74
   0 -12  -2  175.85   15.89
   0  12   2  179.67   15.99
   0 -12   2  173.04   15.81
   0  12  -2  190.84   16.25
   0  12   2  180.40   15.75
   0  12  -2  191.05   15.89
   0  12  -2  158.17   15.55
   0  12   2  170.65   15.49
   0  12  -2  224.88   19.90
   0 -12  -2  198.33   18.01
   0 -12   2  176.41   16.77
   0 -12  -3    4.27    2.08
   0 -12   3    2.72    1.99
   0 -12   3    3.72    1.70
   0 -12   3    4.21    2.42
   0 -12   3    2.63    1.99
   0  12  -3    6.74    2.26
   0 -12   3    4.35    1.91
   0  12   3    1.50    1.56
   0  12   3    5.08    1.64
   0  12  -3    3.60    1.59
   0  12  -3    4.99    1.98
   0  12  -3    0.98    3.08
   0 -12   3    7.67    3.48
   0 -12  -4   27.73    4.00
   0 -12   4   20.79    3.74
   0 -12   4   24.91    3.70
   0  12  -4   27.02    4.23
   0 -12   4   23.76    4.05
   0  12   4   32.27    4.24
   0 -12   4   16.94    3.46
   0 -12   4   28.46    5.16
   0  12   4   26.84    3.52
   0  12  -4   18.53    3.33
   0  12  -4   27.58    3.88
   0 -12   4   26.56    5.30
   0  12  -4   30.08    6.39
   0  12   4   23.51    3.58
   0 -12  -5   34.94    4.59
   0 -12   5   26.92    4.27
   0 -12   5   22.67    4.16
   0  12  -5   30.75    4.75
   0 -12   5   26.27    4.12
   0  12   5   32.46    4.56
   0 -12   5   29.11    5.51
   0 -12  -5   23.94    3.73
   0  12  -5   26.58    4.08
   0  12  -5   28.00    3.98
   0 -12  -5   28.00    4.00
   0  12  -5   22.45    6.00
   0 -12  -5   31.45    5.36
   0 -12   5   22.87    5.37
   0  12   5   36.00    4.20
   0 -12   6   29.36    4.36
   0 -12  -6   26.96    4.16
   0  12   6   30.63    4.46
   0  12  -6   29.41    4.62
   0 -12   6   19.17    3.27
   0 -12   6   21.46    4.00
   0 -12   6   28.53    4.29
   0 -12   6   22.63    5.01
   0 -12  -6   21.36    3.53
   0 -12  -6   25.26    3.84
   0  12  -6   23.26    3.66
   0 -12   6   21.77    5.06
   0  12   6   28.69    3.85
   0  12  -6   26.03    6.02
   0 -12  -6   27.06    5.01
   0  12  -6   25.54    3.94
   0 -12  -7   51.12    6.35
   0 -12   7   57.09    6.62
   0 -12   7   45.47    6.25
   0  12  -7   55.98    6.79
   0 -12   7   40.29    5.37
   0 -12   7   58.98    6.44
   0 -12   7   45.14    7.53
   0 -12  -7   38.49    5.37
   0  12  -7   57.99    6.05
   0 -12  -7   44.53    5.78
   0  12   7   61.23    6.03
   0  12  -7   53.45    6.22
   0  12  -7   47.28    8.51
   0 -12  -7   50.68    7.35
   0  12   7   64.03    6.30
   0 -12   7   51.11    7.63
   0 -12   8    0.46    2.41
   0 -12  -8    1.82    2.56
   0 -12   8   -1.22    1.77
   0  12  -8    1.55    2.18
   0 -12   8   -1.37    2.38
   0 -12   8   -0.92    2.88
   0 -12  -8    0.32    1.46
   0  12  -8    1.03    1.48
   0  12   8   -0.69    1.49
   0 -12  -8    0.40    1.86
   0 -12  -8    2.26    2.64
   0  12   8   -0.39    1.51
   0  12  -8    1.11    2.95
   0 -12   8    0.74    2.60
   0 -12   9  185.17   16.68
   0 -12  -9  194.48   16.82
   0 -12   9  205.85   17.20
   0  12  -9  198.05   16.02
   0  12   9  189.14   15.92
   0 -12  -9  179.93   16.23
   0  12   9  187.12   16.35
   0 -12   9  154.13   17.39
   0 -12  -9  206.70   18.90
   0  12  -9  155.50   19.16
   0 -12   9  136.63   18.09
   0 -12   9  181.08   16.31
   0  12  -9  188.82   16.98
   0 -12   9  143.16   15.37
   0 -12  10  145.62   13.77
   0 -12 -10  132.43   13.61
   0 -12  10  152.01   13.41
   0 -12  10  107.20   12.22
   0  12 -10  162.25   14.12
   0  12  10  149.97   12.89
   0 -12 -10  148.81   13.39
   0  12  10  173.42   13.71
   0 -12  10  144.52   16.16
   0  12 -10  146.16   17.06
   0 -12  10  106.70   13.74
   0 -12 -10  138.49   15.22
   0 -12 -11   12.76    3.50
   0 -12  11    7.35    3.50
   0 -12 -11    8.77    2.77
   0  12  11   11.69    2.47
   0 -12 -11   10.73    3.55
   0  12  11   10.25    2.91
   0  12 -11   11.33    3.43
   0 -12  11    6.73    2.73
   0 -12  11    7.01    3.51
   0 -12 -12    1.03    2.51
   0  12  12   -0.33    1.28
   0 -12 -12    0.43    2.21
   0  12  12    2.67    2.09
   0 -12  12    5.32    3.12
   0 -12  12    4.44    2.40
   0  12 -12   -0.49    2.06
   0 -12 -13   85.29    9.74
   0 -12  13   97.02   10.02
   0 -12  13   89.00    9.35
   0  12 -13  109.13   10.11
   0 -12 -13  111.28    9.86
   0  12  13   82.26    8.75
   0  12  13   94.58    9.76
   0 -12  14    6.25    2.85
   0 -12 -14   10.25    3.46
   0 -12  14   12.91    3.29
   0  12 -14   10.10    2.82
   0 -12  14    5.34    2.27
   0 -12 -14   12.10    2.74
   0  12  14    7.51    1.92
   0  12  14    9.69    2.61
   0 -12  15    0.33    2.06
   0 -12 -15    7.75    2.92
   0 -12  15    3.72    2.62
   0  12 -15    2.82    1.76
   0  12 -15   -0.48    2.42
   0 -12  15    1.92    1.70
   0  12  15    2.64    1.20
   0 -12 -15    2.74    1.83
   0  12  15    1.67    1.64
   0 -12  16    1.91    1.99
   0  12  16    1.63    1.58
   0 -12 -16    3.67    2.60
   0  12 -16    2.64    1.54
   0  12 -16    3.49    2.28
   0 -12  16    2.54    2.01
   0 -12  16    3.13    1.44
   0  12  16    0.79    0.57
   0 -12 -16    4.50    1.94
   0  12  16    5.25    1.66
   0 -12 -17   21.40    3.17
   0  12  17    9.61    2.06
   0 -12 -17   18.01    2.68
   0 -12  17   15.19    2.47
   0  12 -17    9.77    2.34
   0  12 -17   18.70    2.56
   0  12 -18   26.29    2.80
   0 -13   0   -1.50    1.73
   0 -13   0    0.37    2.26
   0  13   0   -0.33    1.39
   0  13   0   -0.70    1.31
   0  13   0    0.93    2.91
   0 -13   0   -1.55    2.53
   0 -13   0   -0.38    1.77
   0  13   0   -1.63    1.95
   0 -13   1   21.67    3.75
   0 -13  -1   16.72    3.68
   0 -13   1   25.36    3.78
   0 -13   1   15.57    3.41
   0  13  -1   23.89    3.91
   0 -13  -1   26.30    3.94
   0  13   1   25.41    3.93
   0  13   1   24.06    3.40
   0  13  -1   17.76    3.21
   0  13   1   19.88    3.41
   0  13  -1   24.90    3.64
   0 -13  -1   16.55    4.98
   0 -13   1   29.36    5.78
   0  13  -1   27.25    5.86
   0 -13  -2  318.52   25.55
   0 -13   2  294.04   25.28
   0 -13   2  305.02   25.28
   0 -13   2  282.58   25.25
   0  13  -2  306.51   25.76
   0 -13  -2  287.66   25.28
   0  13   2  309.49   25.60
   0  13  -2  305.48   25.34
   0  13   2  319.60   25.43
   0  13  -2  261.92   24.98
   0  13   2  303.30   25.10
   0  13  -2  291.78   28.82
   0 -13  -3   -0.81    1.82
   0 -13   3    0.35    1.56
   0 -13   3    3.61    2.14
   0 -13   3   -1.51    2.04
   0  13  -3    0.92    2.06
   0  13   3   -0.42    1.80
   0 -13   3    2.52    2.05
   0  13  -3    0.74    1.47
   0  13   3    0.37    1.54
   0  13   3   -0.34    1.55
   0  13  -3   -0.73    1.61
   0  13  -3   -1.11    2.95
   0 -13   3    2.38    2.79
   0 -13   4    4.39    2.27
   0 -13  -4    2.07    2.22
   0 -13   4    2.76    1.86
   0 -13   4    1.65    2.10
   0  13   4    6.03    2.20
   0  13  -4    2.39    2.17
   0 -13   4    1.94    1.95
   0 -13   4    1.44    2.26
   0 -13  -4    4.37    1.89
   0  13  -4    6.25    2.03
   0  13   4    5.51    1.99
   0  13  -4    6.15    2.15
   0  13  -4   -2.27    3.22
   0 -13  -4    2.71    2.23
   0 -13   4    5.67    3.24
   0 -13  -5   -0.85    1.99
   0 -13   5   -0.76    2.16
   0 -13   5    1.40    1.74
   0  13  -5    1.48    2.02
   0 -13   5   -1.62    2.21
   0 -13   5   -2.11    2.37
   0 -13   5    0.80    2.37
   0 -13  -5   -0.98    1.63
   0  13  -5   -0.73    1.53
   0  13  -5    1.21    1.65
   0 -13  -5    1.47    1.83
   0 -13   5    4.13    3.29
   0  13   5    1.01    1.30
   0  13  -5    1.16    2.66
   0 -13  -5    0.70    2.28
   0 -13  -6   -1.31    2.10
   0 -13   6    0.40    2.18
   0 -13   6   -1.06    1.82
   0  13   6    0.92    1.78
   0 -13   6    1.27    2.29
   0 -13   6   -1.75    2.59
   0  13  -6    0.51    1.90
   0 -13   6    0.86    2.56
   0 -13  -6    0.97    1.58
   0 -13  -6   -0.76    1.67
   0  13  -6   -0.72    1.48
   0  13  -6    2.36    3.14
   0  13  -6    1.24    1.61
   0 -13  -6    0.73    1.94
   0 -13   6    0.83    2.82
   0  13   6   -0.69    1.46
   0 -13  -7   81.53    8.89
   0 -13   7   76.00    8.92
   0 -13   7   77.06    8.83
   0 -13   7   82.53    8.51
   0 -13   7   83.30    8.92
   0  13  -7   88.85    9.37
   0  13  -7   90.49    8.61
   0 -13  -7   73.35    8.09
   0  13   7   88.76    8.46
   0 -13  -7   80.30    8.55
   0  13  -7   76.79    8.64
   0 -13   7   79.86   10.53
   0  13   7   93.92    8.59
   0  13  -7   72.46   11.56
   0 -13  -7   78.21   10.30
   0 -13   7   90.95   11.29
   0 -13  -8   59.49    7.17
   0 -13   8   54.98    7.00
   0 -13   8   49.85    6.87
   0 -13   8   59.05    6.56
   0  13  -8   70.57    7.45
   0 -13   8   45.38    8.16
   0 -13  -8   54.05    6.15
   0  13  -8   58.55    6.38
   0  13   8   65.84    6.50
   0 -13  -8   45.34    6.36
   0 -13  -8   54.15    8.07
   0 -13   8   49.54    7.89
   0  13   8   60.69    6.52
   0  13  -8   44.58    9.08
   0 -13  -9   50.44    6.56
   0 -13   9   51.62    5.73
   0 -13   9   49.23    6.58
   0 -13   9   35.18    7.43
   0  13  -9   44.57    6.34
   0 -13   9   41.93    6.46
   0  13  -9   47.01    5.64
   0  13   9   44.18    5.47
   0 -13  -9   53.91    6.29
   0  13   9   53.80    5.95
   0  13  -9   32.88    7.92
   0 -13   9   41.24    7.02
   0 -13  -9   52.41    7.77
   0 -13 -10   23.11    4.56
   0 -13  10   24.23    4.66
   0 -13  10   25.43    3.56
   0 -13  10   20.75    5.29
   0  13  10   18.42    3.22
   0 -13 -10   14.23    3.49
   0  13  10   21.08    3.55
   0 -13 -10   17.90    4.59
   0  13 -10   15.36    5.33
   0 -13  10   13.26    4.10
   0 -13  10   20.11    4.02
   0  13 -10   25.75    4.36
   0 -13 -11    6.66    3.14
   0 -13  11    8.60    2.02
   0 -13  11   12.26    3.59
   0  13  11    3.72    1.81
   0 -13 -11   11.01    3.10
   0  13  11    7.17    2.32
   0 -13  11    8.14    2.91
   0  13 -11    8.33    2.93
   0 -13  11   12.43    3.75
   0 -13  12   14.38    3.70
   0 -13 -12   12.00    3.44
   0 -13 -12   13.90    3.10
   0  13  12   13.22    2.58
   0  13  12    7.32    2.50
   0 -13  12   11.24    3.69
   0 -13  12   11.28    3.05
   0  13 -12   17.27    3.62
   0 -13  13   17.62    3.71
   0 -13 -13   15.26    3.33
   0 -13  13   12.74    3.42
   0  13 -13   13.42    3.13
   0 -13  13   13.59    3.09
   0  13  13   13.92    2.51
   0 -13 -13   14.80    3.19
   0  13  13   18.04    3.08
   0 -13  14   53.65    6.30
   0 -13  14   57.11    6.07
   0 -13 -14   61.30    7.10
   0  13 -14   44.79    5.79
   0  13 -14   51.08    6.94
   0 -13  14   44.97    5.67
   0  13  14   52.61    5.35
   0 -13 -14   48.18    5.82
   0  13  14   48.54    5.61
   0 -13  15    5.05    2.10
   0  13  15    1.47    1.32
   0 -13 -15    3.96    2.62
   0 -13  15    1.30    1.96
   0  13 -15    1.78    1.49
   0  13 -15    0.89    2.49
   0 -13  15    4.30    1.79
   0 -13 -15    3.64    1.88
   0  13  15    3.64    1.24
   0  13  15    2.90    1.34
   0 -13 -16    1.77    2.00
   0  13  16   -0.36    0.55
   0 -13  16    1.87    1.92
   0 -13  16    1.30    1.10
   0  13 -16    1.87    1.24
   0  13 -16    1.33    1.77
   0 -13 -16    1.76    1.40
   0 -13  16    0.20    1.39
   0 -13 -17    3.71    1.57
   0  13 -17    6.27    1.49
   0  13 -17    6.48    1.31
   0 -13  17    5.84    1.33
   0 -14   0  317.80   24.27
   0 -14   0  261.92   23.94
   0  14   0  283.56   23.89
   0  14   0  269.25   23.66
   0 -14   0  252.09   26.02
   0  14   0  322.09   24.64
   0 -14   0  242.37   23.83
   0 -14  -1    3.38    3.07
   0 -14   1    4.47    2.61
   0 -14   1    2.00    1.91
   0  14   1    2.26    1.76
   0  14  -1    7.65    2.32
   0  14  -1    3.98    2.04
   0  14   1    7.09    2.47
   0  14  -1    7.77    3.77
   0 -14   1    6.04    3.36
   0  14   1    5.09    2.32
   0  14  -1    6.18    2.54
   0 -14  -1    2.59    2.32
   0 -14   1    2.14    2.04
   0 -14   2   23.50    4.02
   0 -14   2   19.02    3.75
   0  14  -2   25.01    3.75
   0  14   2   25.21    3.98
   0  14   2   25.19    3.76
   0  14  -2   26.03    3.95
   0  14  -2   19.98    5.81
   0  14  -2   16.46    3.85
   0  14   2   24.94    4.19
   0 -14   2   26.10    4.11
   0 -14   3    3.81    2.39
   0 -14  -3   10.44    2.96
   0 -14   3    9.13    2.59
   0  14   3    5.55    2.22
   0  14  -3    6.41    2.70
   0 -14   3    3.35    2.62
   0  14  -3    5.57    2.06
   0  14   3    2.38    1.95
   0  14   3    7.91    2.17
   0  14  -3    6.01    2.17
   0 -14  -3    7.84    3.17
   0  14  -3    2.44    3.47
   0 -14  -4    1.38    2.16
   0 -14   4    0.38    2.15
   0 -14   4    1.51    1.91
   0  14   4    0.46    1.80
   0 -14   4    0.43    2.33
   0  14  -4    2.50    2.10
   0 -14  -4    0.36    1.55
   0  14   4    0.80    1.45
   0  14  -4   -0.41    1.73
   0  14  -4    2.35    1.80
   0  14   4    0.75    1.59
   0 -14   4   -0.90    3.26
   0  14  -4   -1.25    3.32
   0 -14  -4   -0.73    1.93
   0 -14   5   13.60    3.08
   0 -14   5   11.47    2.98
   0 -14  -5   12.16    3.45
   0 -14   5   11.85    3.31
   0  14  -5   13.15    3.22
   0  14   5   17.30    3.42
   0 -14   5    7.36    3.48
   0 -14  -5   11.46    2.76
   0  14   5   10.19    2.59
   0  14  -5   14.99    2.97
   0  14  -5   10.45    2.85
   0  14   5   12.89    2.86
   0 -14   5    9.96    4.01
   0 -14  -5   14.20    3.90
   0  14  -5   13.95    4.86
   0 -14   6   11.34    2.84
   0 -14  -6    9.93    2.98
   0 -14   6    7.54    2.82
   0 -14   6   13.23    3.38
   0 -14   6    5.89    2.90
   0  14  -6   16.30    3.47
   0  14   6   14.62    3.13
   0 -14   6   13.33    4.16
   0 -14  -6   10.56    2.47
   0  14  -6   11.31    2.62
   0 -14  -6    7.39    2.41
   0  14  -6    8.81    2.61
   0  14  -6   11.60    4.75
   0 -14  -6   10.74    3.62
   0 -14   6    2.71    3.37
   0 -14   7  101.51    9.64
   0 -14   7   70.96    9.65
   0 -14  -7   91.94    9.98
   0 -14   7   96.40    9.78
   0  14  -7  100.63   10.33
   0 -14   7  111.41   10.32
   0 -14  -7   87.79    9.16
   0  14  -7  106.28    9.68
   0  14  -7   97.00    9.67
   0 -14  -7  105.32    9.79
   0 -14  -7   88.82   11.18
   0 -14   7   93.33   11.83
   0  14  -7   64.22   12.09
   0 -14   7   87.04   11.72
   0 -14  -8    2.96    2.57
   0 -14   8    9.76    3.21
   0 -14   8    8.28    2.45
   0 -14   8    7.88    3.98
   0  14   8    7.07    2.20
   0 -14  -8   10.09    2.84
   0  14  -8   11.59    2.56
   0 -14  -8    7.99    3.16
   0  14  -8   10.59    4.53
   0  14   8    8.58    2.33
   0 -14   8    7.59    3.42
   0  14  -8   11.73    3.24
   0 -14   8    6.18    2.90
   0 -14   8    9.87    3.28
   0 -14   9  107.82   10.29
   0 -14   9   88.73    9.28
   0 -14  -9   90.42   10.17
   0 -14   9   92.31   10.26
   0 -14  -9   88.21    9.66
   0  14   9   94.36    9.34
   0  14   9   98.88    9.37
   0  14  -9   99.76   10.17
   0 -14 -10    2.01    2.63
   0 -14  10    0.92    2.44
   0 -14  10   -0.90    1.57
   0 -14 -10   -2.19    2.10
   0  14  10   -0.35    1.46
   0  14  10    0.35    1.34
   0  14 -10    1.92    2.06
   0 -14  10    4.49    3.18
   0 -14  10    0.45    2.50
   0 -14  11  225.81   20.63
   0 -14  11  245.20   21.02
   0 -14  11  221.41   19.63
   0 -14 -11  234.07   20.97
   0 -14 -11  243.79   20.70
   0  14  11  248.73   20.13
   0  14  11  228.65   20.09
   0  14 -11  246.75   20.90
   0 -14  11  221.19   20.51
   0 -14  12   13.66    3.20
   0 -14 -12   11.73    3.21
   0 -14 -12   13.89    3.07
   0  14  12   13.29    2.52
   0  14  12   13.22    2.59
   0 -14  12   16.37    3.42
   0 -14  12    8.15    3.14
   0  14 -12   10.40    2.81
   0 -14  13    6.35    2.47
   0 -14  13    6.61    2.46
   0  14 -13    8.36    2.35
   0 -14  13    6.40    2.65
   0 -14 -13   11.70    2.69
   0  14  13    8.29    1.89
   0  14  13    7.96    1.92
   0 -14 -14    3.25    2.69
   0  14 -14    1.47    2.72
   0 -14  14   -0.96    2.07
   0 -14  14   -1.47    1.83
   0  14 -14    0.29    1.40
   0  14  14    0.43    1.07
   0 -14 -14    2.43    1.74
   0 -14  14   -0.51    1.58
   0 -14 -15    1.94    2.25
   0  14 -15    0.94    1.16
   0  14 -15   -1.16    2.16
   0 -14  15   -0.44    1.29
   0 -14 -15    1.49    1.51
   0  14  15    0.32    0.74
   0 -14  15   -0.58    1.42
   0 -14 -16   -0.29    1.48
   0  14  16   -0.36    0.94
   0 -14 -16    0.93    1.01
   0 -14  16    0.50    0.94
   0  14 -16   -0.51    0.94
   0  14 -16    1.04    1.40
   0  15   0    1.70    1.92
   0  15   0   -0.43    1.76
   0 -15   0    1.34    2.26
   0 -15   0   -0.44    2.39
   0 -15   0   -0.48    2.28
   0  15   0   -0.52    2.25
   0  15  -1    6.44    2.27
   0  15   1    6.40    2.33
   0  15   1    2.95    1.97
   0  15  -1    8.14    2.54
   0 -15   1   12.05    3.13
   0 -15   1    7.32    2.80
   0  15  -1    6.83    2.75
   0 -15   1    7.95    2.83
   0  15   1    9.33    2.81
   0 -15   2    9.48    2.82
   0 -15   2    4.17    2.51
   0 -15   2    3.20    2.64
   0  15   2    7.68    2.82
   0  15  -2    5.76    2.62
   0  15  -2    7.62    2.35
   0  15   2   10.00    2.74
   0  15   2    9.28    2.63
   0  15  -2   10.77    2.83
   0  15  -2    5.00    3.37
   0 -15   3  161.63   14.92
   0 -15  -3  191.70   15.82
   0 -15   3  131.67   14.62
   0  15  -3  179.47   15.18
   0  15   3  174.94   15.08
   0 -15  -3  147.99   14.72
   0 -15   3  147.65   14.97
   0  15   3  196.14   15.89
   0  15  -3  192.25   15.99
   0  15   3  159.57   14.85
   0  15  -3  154.46   14.89
   0 -15  -3  150.28   16.61
   0  15  -3  126.40   18.02
   0 -15   3  172.43   17.95
   0 -15  -4   49.40    6.56
   0 -15   4   55.18    6.19
   0 -15   4   36.20    5.56
   0 -15  -4   42.58    5.61
   0  15  -4   52.26    5.97
   0  15   4   48.27    5.88
   0  15  -4   51.38    6.50
   0  15   4   64.26    6.73
   0 -15   4   44.71    6.14
   0  15   4   46.62    5.67
   0  15  -4   42.14    5.73
   0  15  -4   30.28    7.78
   0 -15  -4   46.16    7.23
   0 -15   4   45.29    8.00
   0 -15  -5   17.69    3.97
   0 -15   5   14.33    3.22
   0 -15   5   11.50    3.10
   0 -15  -5   18.85    3.27
   0  15   5   22.32    3.83
   0  15  -5   19.79    3.95
   0 -15   5   15.41    3.78
   0  15   5   14.91    3.12
   0  15   5   15.64    3.15
   0  15  -5   15.17    3.11
   0 -15  -5   20.54    4.41
   0  15  -5   26.63    6.50
   0 -15   5    5.79    4.04
   0  15  -5   16.98    3.38
   0  15  -6   39.09    4.90
   0 -15  -6   33.51    4.61
   0  15   6   38.33    5.00
   0 -15   6   32.02    5.22
   0  15  -6   40.60    5.54
   0 -15   6   28.83    4.73
   0 -15  -6   44.48    5.88
   0 -15   6   35.28    4.98
   0  15  -6   33.89    4.81
   0  15  -6   31.01    7.77
   0 -15   6   29.41    6.51
   0 -15   7    1.51    2.11
   0 -15  -7   -0.50    2.68
   0 -15   7    1.20    2.29
   0 -15  -7    2.02    1.70
   0  15   7    0.40    1.49
   0 -15  -7    1.92    1.80
   0  15  -7    1.09    1.52
   0 -15   7    1.82    2.97
   0  15  -7    1.35    3.60
   0  15  -7   -0.49    2.22
   0 -15   7    1.94    2.77
   0  15  -8  152.35   14.20
   0 -15   8  146.03   14.14
   0 -15   8  159.25   13.63
   0 -15  -8  135.36   14.14
   0 -15   8  131.82   13.64
   0  15   8  162.09   13.67
   0 -15  -8  139.66   13.56
   0  15  -9   50.56    6.10
   0 -15   9   41.18    5.33
   0 -15  -9   46.00    6.38
   0 -15   9   46.63    5.98
   0 -15  -9   39.13    5.53
   0  15   9   49.30    5.48
   0  15 -10   45.03    5.59
   0 -15  10   43.08    4.89
   0 -15 -10   36.99    5.74
   0 -15  10   34.29    5.31
   0  15  10   41.72    5.01
   0 -15 -10   44.22    5.50
   0  15 -11  107.64   10.38
   0 -15  11   99.14   10.42
   0 -15 -11   93.55   10.48
   0 -15  11  108.36   10.39
   0 -15 -11  112.69   10.46
   0  15  11  105.78    9.83
   0  15 -12   57.09    7.01
   0 -15  12   36.82    5.28
   0  15 -12   39.47    5.09
   0 -15 -12   38.45    5.32
   0 -15  12   39.14    5.02
   0 -15 -12   49.04    5.43
   0  15  12   42.60    4.72
   0  15 -13   11.94    2.56
   0 -15  13   15.23    3.08
   0 -15  13   10.00    2.43
   0  15  13   15.07    2.35
   0 -15 -13   17.77    2.90
   0  15 -14    1.83    1.31
   0 -15  14    1.03    1.55
   0  15  14    1.63    1.05
   0 -15 -14    0.47    1.21
   0  15  14   -0.47    1.09
   0 -15  14   -0.53    1.29
   0 -15 -15    7.39    2.38
   0  15 -15    6.84    1.47
   0 -15  15    8.88    1.69
   0  15 -15    9.54    2.44
   0  16   0   43.99    5.37
   0 -16   0   32.08    5.19
   0  16   0   32.00    5.52
   0 -16   0   31.45    5.02
   0  16   0   27.31    4.72
   0  16  -1    8.35    3.23
   0 -16   1    2.92    2.44
   0  16   1   11.16    3.52
   0  16   1    6.40    2.53
   0  16  -1    9.92    2.59
   0  16  -1    5.11    2.60
   0  16   1   11.71    2.82
   0 -16   1    5.56    2.75
   0 -16   1    6.68    2.95
   0  16  -2  105.45    9.88
   0  16   2  110.15   10.05
   0  16   2  108.93   10.57
   0  16  -2  102.07   10.47
   0 -16   2   90.31   10.02
   0  16   2   89.60    9.64
   0  16  -2   84.26    9.68
   0 -16   2   96.66    9.83
   0 -16   2   75.16    9.49
   0 -16  -3   17.60    3.62
   0  16  -3   23.77    4.75
   0 -16   3   18.42    4.05
   0  16   3   33.45    4.94
   0  16  -3   19.11    4.23
   0  16  -3   26.19    4.16
   0  16   3   20.09    3.83
   0  16   3   27.28    4.10
   0  16  -3   26.69    3.94
   0 -16   3   27.93    4.27
   0 -16  -3   21.00    4.25
   0 -16   3   22.23    4.02
   0 -16   4    0.83    1.99
   0 -16   4    3.08    2.04
   0 -16  -4    2.08    2.68
   0 -16  -4   -1.43    1.68
   0  16   4    2.05    2.26
   0  16  -4    2.41    2.33
   0 -16   4   -2.37    2.71
   0  16  -4    0.51    1.93
   0  16   4    1.70    1.70
   0  16   4   -0.40    1.80
   0  16  -4    2.71    1.93
   0  16  -4    2.19    1.97
   0  16  -4   -1.33    3.74
   0 -16   5   31.76    4.79
   0 -16   5   34.52    4.98
   0 -16  -5   29.24    5.36
   0  16   5   35.73    4.77
   0 -16  -5   33.54    4.50
   0  16  -5   38.73    4.91
   0  16   5   48.38    5.78
   0  16  -5   38.29    5.36
   0  16  -5   25.99    5.22
   0 -16   5   32.63    5.26
   0  16   5   37.58    4.96
   0  16  -5   34.39    4.85
   0 -16  -6   -0.52    2.51
   0 -16   6    1.57    2.08
   0 -16   6    0.75    2.03
   0 -16  -6   -1.31    1.72
   0  16   6    1.89    1.66
   0  16  -6   -0.79    1.66
   0  16  -6    2.52    2.90
   0  16  -6    0.48    1.86
   0 -16   6   -2.43    3.16
   0 -16   7   36.40    5.52
   0  16  -7   35.56    5.05
   0 -16  -7   30.94    5.32
   0 -16   7   32.40    4.69
   0 -16   7   33.18    4.79
   0  16   7   30.18    4.44
   0 -16   8    3.31    3.01
   0  16  -8   -0.64    2.80
   0  16  -8    1.75    2.18
   0  16   8    0.36    1.54
   0 -16   8    1.00    1.93
   0 -16  -8   -1.01    2.60
   0 -16   8    2.98    2.35
   0  16   9   35.24    4.54
   0  16  -9   34.31    4.77
   0  16  -9   37.50    6.06
   0 -16   9   30.42    5.14
   0 -16  -9   26.17    4.86
   0 -16   9   30.72    4.14
   0 -16   9   28.89    4.54
   0  16   9   39.13    4.56
   0  16 -10   17.44    4.25
   0  16 -10   13.68    3.07
   0 -16 -10   12.18    3.62
   0 -16  10   14.23    3.11
   0 -16  10   10.47    2.25
   0  16  10   20.19    3.00
   0  16  10   21.93    3.23
   0 -16 -10   20.73    3.35
   0  16 -11   -0.97    1.49
   0  16 -11    5.06    3.13
   0  16  11    0.30    1.26
   0  16  11    1.11    1.25
   0 -16 -11    0.62    1.71
   0 -16 -11   -0.40    2.18
   0 -16  11   -1.37    1.84
   0 -16 -12   65.84    7.94
   0  16  12   81.68    7.16
   0  16 -12   73.57    7.04
   0 -16  12   72.72    7.41
   0 -16 -12   64.11    6.92
   0  16  12   70.60    6.79
   0 -16 -12   63.16    7.23
   0 -16  12   61.05    6.70
   0  16  13   20.83    2.85
   0 -16 -13   26.17    4.17
   0  16 -13   21.81    2.91
   0  16 -13   24.88    4.25
   0 -16  13   17.46    3.22
   0 -16  13   18.62    2.65
   0 -16 -13   21.71    2.90
   0  16  13   25.55    2.87
   0  16 -14    9.97    1.70
   0 -16  14    9.17    1.98
   0  17   0   -1.14    2.56
   0  17   0   -0.80    1.69
   0  17   0   -1.44    2.12
   0 -17   0    0.46    2.23
   0  17   1  105.91   10.62
   0  17  -1  111.44   10.69
   0  17  -1  105.20   11.39
   0  17   1  125.71   11.85
   0  17  -1  102.36   10.92
   0  17   1  117.69   11.16
   0 -17   1   93.42   10.66
   0  17  -2   41.63    5.16
   0  17   2   35.49    5.09
   0  17  -2   40.52    5.56
   0  17   2   40.26    5.49
   0 -17   2   39.49    5.44
   0 -17   2   37.87    5.42
   0  17   2   43.21    6.03
   0  17  -2   45.03    6.18
   0 -17   2   32.67    5.47
   0  17  -3   20.41    3.93
   0  17   3   19.51    3.49
   0  17   3   22.35    4.07
   0 -17  -3   20.20    4.41
   0 -17   3   18.76    3.82
   0 -17   3   22.61    3.91
   0  17  -3   27.58    4.58
   0  17   3   29.35    4.78
   0 -17   3   16.93    4.08
   0 -17   4    7.33    2.57
   0 -17   4    6.54    2.61
   0 -17  -4    5.66    3.22
   0  17  -4   13.90    3.41
   0 -17   4    6.12    3.15
   0  17  -4    8.44    3.14
   0  17   4    8.67    3.08
   0  17   4    7.37    2.29
   0  17   4    5.58    2.35
   0  17  -4    7.30    2.45
   0 -17   5   31.54    4.65
   0 -17  -5   35.72    5.46
   0 -17   5   28.39    4.33
   0  17   5   33.24    4.28
   0 -17   5   30.81    5.06
   0  17  -5   29.75    4.80
   0  17  -5   23.29    4.79
   0  17   5   26.80    4.33
   0  17  -5   22.79    4.10
   0  17   6  139.20   12.62
   0  17  -6  131.38   13.15
   0 -17   6  128.74   13.27
   0  17  -6  157.54   14.37
   0  17   6  135.73   12.87
   0 -17   6  124.43   12.69
   0 -17  -6  148.59   13.82
   0 -17   6  143.57   12.94
   0  17   7   36.20    4.78
   0 -17  -7   43.03    6.10
   0 -17   7   34.91    5.05
   0 -17   7   39.72    5.11
   0 -17   7   45.04    6.07
   0  17  -7   45.76    5.60
   0  17  -7   40.87    6.27
   0  17  -8    8.72    3.58
   0 -17   8   10.18    3.23
   0  17  -8    9.32    2.71
   0 -17  -8   12.21    3.60
   0 -17   8    9.90    2.36
   0 -17   8    7.45    2.58
   0  17   8   10.23    2.34
   0  17  -9    2.10    1.90
   0 -17   9    5.31    2.68
   0  17  -9    6.14    3.05
   0 -17   9    5.83    2.21
   0 -17   9    6.66    2.00
   0 -17  -9    5.46    2.88
   0  17   9   10.46    2.13
   0  17   9    8.53    2.11
   0  17 -10    4.29    1.84
   0  17 -10    9.38    3.34
   0  17  10    5.02    1.61
   0  17  10    4.78    1.65
   0 -17 -10    4.88    2.53
   0 -17  10    3.93    1.91
   0 -17 -11   -0.40    2.07
   0  17 -11    0.26    1.26
   0  17 -11    2.35    2.54
   0  17  11   -0.23    1.03
   0  17  11    2.19    1.39
   0 -17  11   -0.19    1.35
   0 -17 -11   -2.02    2.10
   0  17  12    0.40    0.90
   0  17  12   -0.18    0.90
   0 -17 -12   -0.71    1.82
   0  17 -12   -1.21    2.10
   0 -17  12   -0.27    1.68
   0  17 -12   -0.42    1.05
   0 -17 -13   -0.58    1.57
   0  17 -13   -0.31    1.59
   0  17 -13    0.93    0.83
   0  18   0   90.62    9.28
   0 -18   0   66.82    8.19
   0  18   0   78.52    8.59
   0  18   1   42.55    5.76
   0  18  -1   34.03    5.24
   0  18  -1   25.69    4.59
   0  18   1   35.26    5.04
   0  18   1   27.04    4.05
   0 -18   1   25.51    4.54
   0 -18  -1   34.02    5.10
   0  18   2   89.53    9.14
   0  18  -2   76.15    9.45
   0  18   2  100.55    9.85
   0 -18   2   86.46    9.45
   0  18  -2  108.73   10.37
   0  18   2  116.69   10.68
   0 -18   3    1.58    2.34
   0  18   3    4.77    2.49
   0  18   3    4.49    1.80
   0  18  -3    3.87    2.26
   0  18   3   -0.50    2.46
   0  18  -3    8.66    2.80
   0 -18  -4   12.45    3.53
   0 -18   4    7.96    2.64
   0  18   4   11.79    2.39
   0  18   4   10.35    2.82
   0  18  -4    7.57    2.55
   0 -18   4    9.30    3.25
   0  18  -4    5.92    2.63
   0 -18  -5   11.59    3.71
   0 -18   5    7.86    2.50
   0  18  -5    9.87    3.07
   0  18  -5   11.57    3.01
   0 -18   5    6.66    3.05
   0  18   5   12.18    2.87
   0  18   5   10.12    2.27
   0  18  -5   13.02    2.79
   0  18   6   77.10    7.60
   0 -18   6   68.40    8.35
   0  18  -6   76.57    8.69
   0  18  -6   80.48    8.23
   0  18   6   76.62    8.00
   0 -18  -6   80.53    8.84
   0 -18   6   77.24    7.91
   0  18   7   54.10    5.96
   0  18  -7   65.90    6.78
   0  18  -7   45.47    6.85
   0 -18   7   53.99    6.90
   0 -18  -7   63.73    7.41
   0 -18   7   67.05    6.40
   0  18   8   69.05    7.07
   0 -18   8   68.17    7.91
   0  18  -8   72.63    7.52
   0  18  -8   91.45    8.86
   0 -18   8   67.10    6.99
   0 -18  -8   90.55    8.64
   0 -18  -9    4.17    2.22
   0 -18   9    8.07    2.64
   0  18  -9    8.01    2.03
   0  18  -9    9.42    3.02
   0  18   9    6.18    1.87
   0  18   9    5.28    1.51
   0 -18  -9    4.00    2.51
   0  18  10   25.50    4.04
   0 -18 -10   24.75    4.46
   0  18  10   42.42    4.12
   0 -18  10   39.74    4.86
   0  18 -10   44.15    5.47
   0  18 -10   44.36    4.50
   0  18  10   48.31    4.55
   0 -18 -10   49.07    5.32
   0 -18 -11    1.13    1.61
   0  18 -11    4.00    1.35
   0  18 -11    2.38    1.83
   0  18  11    4.81    1.36
   0 -18 -11    4.48    1.77
   0 -18 -12   -0.67    1.18
   0  18 -12    0.78    1.39
   0  18 -12   -0.14    0.72
   0  19   0   -1.37    2.47
   0 -19   0    0.77    2.13
   0  19   0   -0.85    1.82
   0  19  -1   17.53    3.52
   0  19   1    9.60    3.05
   0 -19   1   11.58    3.05
   0 -19  -1    5.12    2.71
   0  19  -1   12.93    2.96
   0  19   1   15.94    3.30
   0  19   2   80.86    7.79
   0  19  -2   60.47    7.12
   0 -19   2   60.90    6.86
   0  19   2   55.61    6.91
   0  19  -2   55.24    6.81
   0  19  -3   60.66    7.09
   0 -19   3   65.11    7.00
   0  19  -3   57.15    6.76
   0  19   3   64.55    7.08
   0  19  -4  290.24   22.54
   0 -19   4  254.20   21.93
   0 -19  -4  263.89   22.50
   0  19  -4  227.37   21.78
   0  19   4  267.53   22.25
   0  19  -5  135.18   12.06
   0  19   5  135.04   12.01
   0 -19  -5  121.87   12.30
   0 -19   5  119.66   11.59
   0 -19  -6   -0.28    0.88
   0  19  -6    2.33    1.75
   0  19  -6    2.86    2.02
   0  19   6    4.63    2.02
   0 -19   6    4.90    1.85
   0 -19  -6    3.32    2.59
   0  19  -7   13.09    2.78
   0  19  -7   11.02    2.35
   0 -19   7    8.31    1.81
   0 -19  -7    9.13    2.93
   0  19  -8   16.71    2.53
   0  19  -8   14.59    2.81
   0 -19  -8   11.26    3.10
   0  19   9    4.36    1.57
   0  19   9    6.76    1.69
   0 -19  -9    9.20    2.38
   0  19  -9    5.08    1.48
   0  19  -9    9.36    2.24
   0  19  10    0.95    0.96
   0 -19 -10    2.92    1.49
   0  19 -10    1.46    0.95
   0  19 -10   -0.24    1.26
   0  20   0    8.53    2.41
   0 -20   0   15.03    2.95
   0  20   0   12.47    2.84
   0 -20  -1   21.51    3.67
   0 -20   1   18.10    3.46
   0  20   1   27.43    3.76
   0  20  -1   26.82    3.76
   0  20  -1   21.43    3.73
   0  20   1   21.75    3.68
   0  20  -2   26.24    3.99
   0 -20   2   22.39    3.73
   0  20  -2   28.06    3.86
   0  20   2   27.35    3.92
   0  20  -3  134.98   11.51
   0 -20   3  114.20   11.07
   0  20   3  137.60   11.54
   0  20  -3  108.72   10.96
   0  20  -4   51.75    5.62
   0 -20   4   49.36    5.41
   0 -20  -4   48.37    5.92
   0  20   4   48.23    5.59
   0  20  -5   20.91    3.16
   0 -20  -5   25.17    3.70
   0 -20   5   15.92    2.70
   0  20   5   20.64    3.18
   0  20  -6    6.66    1.87
   0 -20   6    8.34    1.70
   0 -20  -6    5.48    2.20
   0  20   6    8.42    2.12
   0  20  -7    0.63    1.11
   0  20   7    1.21    1.27
   0 -20  -7    3.22    1.78
   0 -20  -8   12.63    2.53
   0  20   8   14.50    2.43
   0  20  -8   17.25    2.16
   0  21   0    0.23    1.10
   0 -21   0   -1.81    1.74
   0  21   1    0.72    1.20
   0  21  -1   -0.66    1.05
   0 -21   1   -0.25    1.61
   0  21  -2   58.89    5.37
   0 -21   2   44.37    5.14
   0 -21  -2   48.47    5.41
   0  21   2   46.12    5.15
   0  21  -3    0.44    1.23
   0 -21   3   -0.61    1.35
   0  21   3    1.67    1.23
   0  21  -4   11.45    1.99
   0 -21  -4   11.58    2.42
   0 -21   4    9.50    1.82
   0  21   4   15.95    2.32
   0  21  -5  194.55   16.85
   0  21   5  228.33   17.24
   0 -21  -5  194.36   17.21
   0 -21  -6    1.43    1.38
   0 -22  -1   12.24    1.96
  -1   0  21    4.94    1.18
  -1   0  21    4.02    1.94
   1   0 -21    0.81    1.97
  -1   0  21    6.24    1.91
  -1   0  21    2.05    1.62
   1   0 -21    0.52    1.50
  -1   0  21    4.16    1.81
  -1   0  20   -1.24    1.26
  -1   0  20    0.35    2.04
   1   0 -20   -1.46    2.45
  -1   0  20   -1.82    1.42
  -1   0  20   -1.53    2.00
   1   0 -20    0.34    2.02
  -1   0  20   -0.77    2.15
  -1   0  20    0.34    1.94
  -1   0  19    5.32    2.56
   1   0 -19    2.21    2.82
  -1   0  19    3.30    1.59
  -1   0  19    3.56    2.18
   1   0 -19   -1.23    2.30
  -1   0  19    6.92    2.77
  -1   0  18    0.98    2.20
  -1   0  18    3.61    2.58
   1   0 -18   -0.49    2.94
  -1   0  18   -1.02    1.61
   1   0 -17   31.78    3.93
  -1   0  17   37.07    5.56
   1   0 -17   34.01    5.76
  -1   0  17   34.90    5.48
  -1   0  17   35.92    4.38
  -1   0  16    1.05    3.13
  -1   0  16   -0.90    1.69
   1   0 -16    3.17    3.33
  -1   0  16    5.20    2.31
   1   0 -16    0.53    1.22
  -1   0  16    3.55    2.74
   1   0 -16   -0.94    3.30
  -1   0  16   -2.09    2.59
  -1   0  16   -2.21    4.02
  -1   0  15  295.91   27.93
  -1   0  15  315.56   24.13
  -1   0  15  312.57   25.10
   1   0 -15  293.04   25.64
  -1   0  15  321.27   25.30
   1   0 -15  240.17   23.57
  -1   0  15  304.76   27.93
   1   0 -15  246.94   26.51
  -1   0  14    1.88    3.86
  -1   0  14    3.67    2.10
  -1   0  14    4.72    2.94
   1   0 -14    2.93    2.86
  -1   0  14   -0.46    2.07
   1   0 -14    1.62    1.53
  -1   0  14    3.73    4.12
   1   0 -14    1.68    3.07
  -1   0  13  116.34   13.20
  -1   0  13  115.42   10.37
  -1   0  13  108.56   10.85
   1   0 -13  107.16   11.53
  -1   0  13  121.36   11.07
   1   0 -13   93.63    9.84
   1   0 -13  107.04   12.44
  -1   0  13  141.74   13.77
   1   0 -12    1.52    1.56
  -1   0  12   -0.29    1.45
   1   0 -12    0.50    1.95
  -1   0  12    3.80    2.14
  -1   0  12    1.56    2.13
   1   0 -12    4.17    2.85
  -1   0  12    2.31    2.61
  -1   0  11   13.47    3.27
   1   0 -11   12.76    2.59
  -1   0  11   13.31    2.97
   1   0 -10    0.31    1.12
  -1   0  10   -0.79    1.62
  -1   0   9  122.36   11.43
   1   0  -9  123.22   11.08
   1   0  -8   -0.24    1.11
   1   0  -7   99.61    8.90
   1   0  -6   -0.62    1.60
   1   0  -6    1.02    1.00
   1   0  -5 2558.79  209.97
   1   0  -5 2745.08  209.33
   1   0  -4   -0.23    1.64
   1   0  -4   -0.11    0.78
   1   0  -4    0.63    1.19
   1   0  -3   94.57    8.56
   1   0  -3   96.11    8.48
   1   0  -3   95.44    8.02
   1   0  -2    0.32    1.28
   1   0  -2    0.51    1.43
   1   0  -2    0.60    0.88
   1   0  -2   -0.28    1.00
   1   0  -1  553.35   46.95
   1   0  -1  589.07   46.96
   1   0  -1  557.77   47.04
   1   0  -1  610.67   47.19
   1   0  -1  658.87   47.16
   1   0   0   -0.16    1.23
   1   0   0    0.16    1.30
   1   0   0    1.62    1.37
   1   0   0    0.73    1.85
   1   0   0   -1.67    1.37
   1   0   1 2800.83  233.53
   1   0   1 2868.84  233.38
   1   0   1 2933.28  233.50
   1   0   1 3140.48  233.60
   1   0   1 3261.34  233.68
   1   0   2    1.01    1.75
   1   0   2    2.51    1.41
   1   0   2   -0.20    1.44
   1   0   2    1.52    1.37
   1   0   2   -0.75    1.36
   1   0   2   -1.17    1.50
  -1   0  -2    0.11    0.93
   1   0   3 1860.19  152.89
   1   0   3 2080.99  153.01
   1   0   3 1816.81  152.84
  -1   0  -3 1852.33  152.48
   1   0   3 1968.71  152.91
   1   0   3 2203.79  153.08
   1   0   4    0.25    1.56
   1   0   4    2.51    1.70
   1   0   4   -0.53    1.62
   1   0   4   -1.07    1.69
   1   0   4    1.34    1.79
  -1   0  -4   -0.40    1.29
   1   0   5  384.58   34.54
   1   0   5  398.25   34.53
   1   0   5  419.88   34.66
  -1   0  -5  442.47   34.26
   1   0   5  426.34   34.38
   1   0   5  446.48   34.74
   1   0   6   -1.00    1.59
   1   0   6   -0.82    2.21
   1   0   6   -0.82    2.18
   1   0   6    0.86    2.13
   1   0   6   -0.41    2.32
  -1   0  -6   -0.63    1.84
   1   0   7  495.57   43.32
   1   0   7  456.80   43.22
   1   0   7  549.84   43.52
  -1   0  -7  576.32   42.94
   1   0   7  515.39   42.73
   1   0   7  525.66   43.44
   1   0   8   -0.90    1.94
   1   0   8   -0.60    2.68
   1   0   8   -1.19    2.74
   1   0   8    1.87    2.55
   1   0   8    2.39    2.81
  -1   0  -8   -0.45    1.91
   1   0   9   88.93   10.74
   1   0   9   83.16   10.82
   1   0   9  122.28   11.93
  -1   0  -9  103.49    9.87
  -1   0  -9   98.74   10.12
   1   0   9   75.37    9.66
   1   0   9   95.67   11.08
  -1   0 -10   -1.26    2.43
  -1   0 -10   -0.49    1.94
   1   0  10    0.61    2.15
   1   0  10    1.62    3.31
   1   0  10   -0.85    3.08
   1   0  10    0.81    3.13
   1   0  10    0.40    1.86
   1   0  10    0.81    3.15
  -1   0 -11 1461.03  107.57
   1   0  11 1168.01  106.47
  -1   0 -11 1353.23  106.16
   1   0  11 1372.37  108.67
   1   0  11 1342.79  108.15
   1   0  11 1302.13  108.08
   1   0  11 1263.03  105.27
   1   0  11 1348.78  105.58
   1   0  11 1381.17  108.35
  -1   0 -12    2.29    1.86
  -1   0 -12   -1.71    2.54
   1   0  12   -0.60    1.72
   1   0  12   -0.22    1.14
   1   0  12   -1.07    3.32
   1   0  12    5.11    3.59
   1   0  12    2.05    3.04
   1   0  12   -0.47    2.19
   1   0  12   10.19    2.95
   1   0  12    1.03    3.36
   1   0  13  300.19   27.31
   1   0  13  365.67   31.22
   1   0  13  266.35   25.61
   1   0  13  346.57   26.47
   1   0  13  331.81   30.70
   1   0  13  269.61   29.87
   1   0  13  316.06   30.48
   1   0  13  327.55   27.50
   1   0  13  343.26   27.81
  -1   0 -13  400.10   30.85
  -1   0 -13  323.63   27.95
  -1   0 -14   -0.64    1.80
  -1   0 -14    1.05    2.62
   1   0  14    0.50    1.28
   1   0  14   -2.51    2.67
   1   0  14    0.55    2.48
   1   0  14   -0.55    2.58
   1   0  14    1.21    3.20
   1   0  14    0.62    2.80
   1   0  14   -1.78    2.44
   1   0  14   -1.18    3.52
   1   0  14   -1.20    3.73
   1   0  14    2.47    3.48
   1   0  15  133.39   12.72
   1   0  15  107.64   14.55
   1   0  15  121.93   11.99
   1   0  15  128.05   15.28
   1   0  15   85.41   13.82
   1   0  15   95.76   14.25
   1   0  15  102.96    9.98
   1   0  15  113.43   11.75
   1   0  15  111.50   11.86
  -1   0 -15  128.67   14.70
  -1   0 -15  102.14   11.80
   1   0  16   -0.25    1.27
   1   0  16   -1.13    2.75
   1   0  16    0.51    2.44
   1   0  16    1.23    2.89
   1   0  16   -1.67    3.01
   1   0  16    0.63    2.84
   1   0  17    3.79    1.60
   1   0  17    2.68    3.24
   1   0  17    2.35    2.88
   1   0  17    3.58    3.24
   1   0  17    6.86    3.69
   1   0  17    7.17    2.89
   1   0  18    0.48    2.57
  -1   0 -18    0.27    1.31
   1   0  18    0.53    2.40
   1   0  18    0.53    2.51
   1   0  18    0.95    2.44
   1   0  18   -0.41    1.99
   1   0  19    3.32    2.61
  -1   0 -19   -0.21    1.11
   1   0  19   -0.92    2.27
   1   0  19    0.40    2.38
   1   0  19   -1.81    2.51
   1   0  19    0.33    1.73
   1   0  20    0.99    2.05
  -1   0 -20   -0.31    2.11
   1   0  20   -1.45    1.80
   1   0  20   -1.26    1.96
   1   0  20   -0.35    1.76
   1   0  20   -0.22    1.24
   1   0  21   25.86    2.97
   1   0  21   21.78    2.82
  -1  -1  21   13.26    1.64
  -1   1  21   13.35    1.49
   1   1 -21   12.94    2.69
  -1  -1  21   14.12    2.55
  -1   1  21    7.50    2.10
  -1   1  21    6.03    2.03
  -1  -1  21   13.03    2.57
  -1  -1  20    2.21    1.36
  -1   1  20    2.04    1.18
   1   1 -20    2.51    2.62
  -1  -1  20    0.34    2.08
  -1   1  20    1.26    1.46
  -1   1  20    5.26    2.47
   1  -1 -20   -0.34    2.09
  -1  -1  20   -0.33    2.01
  -1   1  20   -1.15    2.05
  -1   1  19    2.12    1.44
  -1  -1  19   -0.46    1.41
  -1  -1  19   -1.21    2.24
   1   1 -19    0.87    2.79
  -1  -1  19    1.74    1.59
  -1   1  19    0.89    2.00
   1  -1 -19   -0.41    2.09
  -1  -1  19    0.80    2.21
   1   1 -18    0.97    2.89
  -1  -1  18   -1.78    2.54
  -1  -1  18    0.27    1.53
  -1   1  18   -1.47    1.40
   1  -1 -18    0.93    1.11
  -1   1  18   -1.46    2.41
   1   1 -17   21.60    4.77
  -1  -1  17   31.28    4.96
   1  -1 -17   20.65    3.27
  -1   1  17   28.88    4.78
  -1  -1  17   28.60    3.84
  -1   1  17   25.92    3.56
  -1   1  16   44.24    9.70
   1  -1 -16   80.37   10.67
  -1   1  16   63.58   10.23
   1   1 -16   59.76   10.48
  -1   1  16   79.33    7.61
  -1  -1  16   84.61    7.85
   1   1 -16   67.47    8.60
  -1  -1  16   85.42    8.76
   1  -1 -16   78.96    9.05
   1  -1 -16   77.61    7.54
  -1   1  16   83.66    8.73
  -1   1  16   70.57   10.95
  -1  -1  16   82.63   11.33
  -1   1  15  100.04   12.31
   1  -1 -15  110.36   12.34
   1   1 -15   83.13   12.36
  -1  -1  15   97.57    9.02
  -1   1  15   91.23    8.80
  -1  -1  15  100.08    9.76
   1  -1 -15   89.37   10.25
  -1   1  15  102.76    9.93
   1  -1 -15   76.89    8.51
   1   1 -15   86.17    8.43
  -1  -1  15   90.55   11.99
  -1   1  14  261.75   26.20
   1  -1 -14  252.73   25.69
   1   1 -14  298.74   27.71
  -1  -1  14  287.23   23.28
  -1   1  14  278.46   23.14
  -1  -1  14  287.67   23.95
   1  -1 -14  271.31   24.69
   1   1 -14  241.10   22.66
  -1   1  14  346.23   24.58
   1  -1 -14  268.02   23.06
  -1  -1  14  287.65   26.64
  -1   1  13  393.62   32.64
   1  -1 -13  401.16   32.32
   1   1 -13  276.35   29.57
  -1  -1  13  342.36   30.84
  -1  -1  13  390.13   29.36
  -1   1  13  408.04   29.43
  -1  -1  13  351.75   29.71
   1  -1 -13  370.27   30.72
   1  -1 -13  319.13   28.96
  -1   1  13  376.01   30.03
   1   1 -13  327.77   28.76
  -1  -1  13  377.04   32.56
  -1  -1  12  225.48   17.58
   1   1 -12  201.82   18.65
   1  -1 -12  214.73   18.81
  -1   1  12  236.04   18.31
  -1   1  12  242.24   20.57
   1  -1 -12  196.83   19.56
  -1  -1  12  201.31   18.84
   1   1 -12  148.48   17.61
   1  -1 -12  236.13   20.69
  -1  -1  12  185.86   17.89
  -1   1  12  199.94   18.28
  -1  -1  11  114.18   10.93
  -1  -1  11  106.88   11.04
  -1   1  11  113.14   10.84
   1   1 -11  102.22   10.53
   1  -1 -11   99.57   10.02
   1  -1 -11  142.28   12.98
   1   1 -10  488.37   41.22
  -1  -1  10  589.44   42.02
   1  -1 -10  543.54   42.89
   1  -1 -10  458.30   40.72
  -1   1  10  517.59   41.43
  -1  -1  10  491.93   41.67
  -1   1   9  164.42   15.94
   1  -1  -9  186.07   15.72
  -1  -1   9  203.63   16.80
   1  -1  -9  217.84   17.68
   1   1  -9  175.76   16.06
   1   1  -8   77.49    7.65
   1  -1  -8   85.84    8.55
   1  -1  -8   76.68    7.21
   1  -1  -7    1.06    1.63
   1   1  -7    0.24    1.14
   1  -1  -7   -0.17    0.83
   1  -1  -6   33.84    3.35
   1  -1  -6   33.34    4.12
   1   1  -6   30.69    3.67
   1  -1  -5    0.52    0.69
   1   1  -5    0.18    1.02
   1  -1  -5    1.64    1.43
   1  -1  -4    5.20    1.99
   1  -1  -4    4.83    1.61
   1  -1  -4    5.90    0.99
   1   1  -4    5.11    1.43
   1  -1  -3   48.46    4.99
   1  -1  -3   49.76    4.17
   1  -1  -3   52.06    4.77
   1   1  -3   41.55    4.99
   1   1  -3   52.27    4.73
   1  -1  -2  814.51   63.73
   1  -1  -2  860.47   63.85
   1   1  -2  818.18   63.63
   1   1  -2  680.72   63.59
   1  -1  -2  860.35   63.44
   1  -1  -1 5170.72  381.93
   1  -1  -1 4645.11  381.82
   1   1  -1 4771.76  382.06
   1   1  -1 4793.68  382.00
   1  -1  -1 5313.22  382.01
   1  -1  -1 4823.18  381.32
   1   1  -1 4894.35  381.82
   1  -1   0   17.76    2.57
   1   1   0   20.04    2.95
   1  -1   0   18.80    2.56
   1   1   0   21.48    2.79
   1  -1   0   21.91    2.74
   1   1   1  636.59   49.31
   1  -1   1  661.47   49.31
   1  -1   1  620.77   49.09
   1   1   1  663.83   49.24
   1  -1   1  657.29   49.34
  -1   1  -1  583.59   48.47
   1   1   2 2494.20  197.98
   1  -1   2 2578.62  197.77
   1  -1   2 2618.66  198.00
   1   1   2 2550.82  197.84
   1   1   2 2481.67  197.97
  -1  -1  -2 2608.06  197.13
   1  -1   2 2393.68  197.88
  -1   1  -2 2337.29  197.35
   1  -1   2 2709.35  198.09
   1  -1   3   14.74    2.51
   1   1   3   17.31    2.63
   1   1   3   13.98    2.53
   1  -1   3   14.78    2.56
   1  -1   3   16.10    2.62
  -1   1  -3   14.54    2.06
  -1  -1  -3   15.24    2.23
   1  -1   4 6262.85  489.88
   1   1   4 6291.64  489.91
   1   1   4 6077.30  489.80
   1  -1   4 6204.21  489.86
   1  -1   4 6784.47  489.89
  -1  -1  -4 6063.59  489.51
  -1   1  -4 6292.33  489.40
   1   1   5  211.86   18.86
   1  -1   5  210.03   18.90
   1   1   5  224.29   19.05
   1  -1   5  210.00   18.89
   1   1   5  212.84   18.68
   1  -1   5  212.21   18.72
  -1   1  -5  219.59   18.44
  -1  -1  -5  247.73   18.74
   1   1   6 1950.80  153.78
   1  -1   6 1775.54  153.59
   1   1   6 2123.70  154.08
  -1   1  -6 2021.99  153.25
   1  -1   6 1853.28  153.32
  -1  -1  -6 2071.43  153.39
   1   1   6 1835.31  153.22
   1  -1   6 1968.52  153.83
   1   1   7    4.50    2.13
   1  -1   7    5.78    2.34
   1  -1   7    5.04    2.84
   1   1   7    8.36    2.95
   1   1   7    5.16    2.86
   1  -1   7    3.05    2.82
  -1   1  -7    5.85    2.47
  -1   1  -7    8.60    2.40
  -1  -1  -7    5.03    2.31
   1   1   8   59.27    7.52
   1  -1   8   37.86    6.70
   1   1   8   47.09    6.82
  -1   1  -8   52.79    6.25
   1  -1   8   47.60    6.41
   1   1   8   52.05    6.35
  -1   1  -8   58.13    6.56
  -1  -1  -8   63.11    6.69
   1  -1   8   55.07    7.28
   1   1   9   20.61    3.85
   1  -1   9    8.97    3.34
   1   1   9   22.88    4.56
   1  -1   9   15.45    4.52
   1   1   9   18.89    4.91
  -1   1  -9   18.00    3.50
  -1  -1  -9   16.52    3.74
  -1   1  -9   17.91    3.73
   1  -1   9   17.01    4.31
  -1   1 -10   29.94    4.74
  -1  -1 -10   31.73    5.15
  -1  -1 -10   30.47    4.67
  -1   1 -10   38.12    5.51
   1  -1  10   30.29    5.40
   1   1  10   20.88    5.13
   1  -1  10   28.31    5.80
   1   1  10   28.60    5.83
   1   1  10   28.49    4.43
   1  -1  10   30.22    6.04
  -1   1 -11    4.38    2.48
  -1   1 -11    1.53    2.59
  -1  -1 -11    1.42    2.23
  -1  -1 -11    3.10    2.07
   1   1  11   11.86    4.70
   1  -1  11    2.75    3.11
   1   1  11    1.90    2.97
   1  -1  11   -0.43    2.21
   1  -1  11    4.43    2.78
   1   1  11    0.91    2.02
   1  -1  11    1.85    3.69
  -1   1 -12   26.56    5.34
  -1   1 -12   14.88    3.53
  -1  -1 -12   17.90    4.50
  -1  -1 -12   17.21    3.74
   1  -1  12   16.43    2.61
   1  -1  12   13.59    2.78
   1   1  12   14.75    2.35
   1   1  12   15.85    5.40
   1  -1  12   16.34    5.13
   1   1  12   19.35    5.55
   1  -1  12   14.13    4.45
   1  -1  12   15.21    3.53
   1   1  12   16.83    3.70
   1  -1  12   14.45    5.00
  -1  -1 -13    0.92    2.86
  -1   1 -13    0.64    2.08
  -1  -1 -13   -0.59    1.75
  -1   1 -13   -1.00    2.67
   1  -1  13   -3.99    2.04
   1   1  13    3.19    1.96
   1   1  13    0.88    1.19
   1  -1  13   -0.25    1.36
   1   1  13   -1.12    3.48
   1   1  13    3.47    4.21
   1  -1  13    1.11    3.47
   1  -1  13   -0.92    2.85
   1  -1  13    2.58    2.95
   1   1  13    0.56    2.56
   1  -1  13    2.26    3.00
   1  -1  13    3.62    2.91
   1  -1  14   50.52    8.98
   1  -1  14   43.28    6.12
   1   1  14   51.57    6.55
   1  -1  14   29.51    7.13
   1   1  14   30.89    7.77
   1   1  14   37.15    7.81
   1   1  14   27.90    3.91
   1  -1  14   29.72    4.13
   1   1  14   39.99    4.93
   1  -1  14   37.10    4.81
   1  -1  14   37.30    5.66
   1   1  14   36.88    5.84
  -1   1 -14   44.82    6.31
  -1  -1 -14   47.84    6.19
  -1   1 -14   28.94    6.63
  -1  -1 -14   48.00    7.68
   1   1  15   26.13    6.42
   1  -1  15   24.30    6.18
   1   1  15   24.24    7.20
  -1   1 -15   26.96    6.37
  -1  -1 -15   23.61    4.40
  -1  -1 -15   20.01    5.42
  -1   1 -15   24.38    4.60
   1  -1  15   24.39    3.39
   1   1  15   20.54    3.06
   1  -1  15   19.79    4.43
   1  -1  15   11.21    3.65
   1   1  15   21.56    4.70
   1   1  15   30.00    5.27
   1  -1  15   26.22    6.86
   1  -1  15   31.49    5.09
   1   1  16    4.10    1.48
   1  -1  16    2.40    1.61
   1  -1  16    5.55    2.48
   1  -1  16    6.74    3.18
   1   1  16    7.99    3.38
   1   1  16    1.26    2.92
   1  -1  16    1.11    2.83
   1  -1  17   64.40    7.07
   1  -1  17   69.30    8.61
   1  -1  17   72.60    8.39
   1   1  17   85.07    8.66
   1   1  17   79.69    9.02
   1  -1  17   78.11    8.75
   1   1  17   85.81    9.49
   1  -1  18   -0.99    1.04
   1  -1  18    3.36    2.92
   1   1  18   -2.12    2.34
  -1  -1 -18    0.84    1.56
   1   1  18    0.53    2.51
   1  -1  18    2.35    2.79
   1  -1  18    1.20    2.05
   1   1  18    1.70    2.46
   1  -1  19    3.68    2.55
  -1   1 -19   -0.19    0.76
   1   1  19    0.45    2.10
  -1  -1 -19    3.53    1.44
   1  -1  19    5.53    2.57
   1   1  19    4.05    2.54
   1   1  19    6.83    2.27
   1  -1  19    4.24    1.91
   1  -1  20   -0.64    1.94
  -1   1 -20    2.75    2.37
   1   1  20    1.44    2.06
  -1  -1 -20    0.61    0.88
   1  -1  20   -0.61    2.01
   1   1  20    1.75    1.95
   1   1  20    1.68    1.53
   1  -1  20    1.63    1.17
  -1   1 -21   15.15    2.90
   1  -1  21   21.66    3.00
  -1  -2  21    1.18    0.91
  -1  -2  21   -0.49    1.49
   1  -2 -21    0.25    1.76
   1   2 -21   -1.24    1.70
  -1   2  21   -0.24    1.58
  -1   2  21    0.49    1.01
  -1   2  21    0.27    1.37
  -1  -2  21   -1.35    1.46
   1   2 -21    0.73    1.37
  -1  -2  21    1.04    1.42
  -1   2  21   -0.27    1.30
   1  -2 -21    0.24    1.37
  -1  -2  21   -1.15    1.56
  -1   2  21   -3.09    1.80
  -1  -2  20   13.64    2.15
  -1   2  20   16.05    2.00
  -1   2  20   17.74    3.17
  -1  -2  20   11.04    2.77
   1  -2 -20   16.03    3.38
   1   2 -20    8.65    2.89
  -1   2  20    8.39    2.33
  -1   2  20   13.31    2.96
  -1  -2  20   15.74    3.00
   1   2 -20    0.33    1.99
  -1  -2  20    7.56    2.61
  -1  -2  20    2.14    2.09
   1  -2 -20    0.33    1.92
  -1   2  20    9.81    2.74
  -1   2  20    6.63    2.58
  -1   2  19   13.10    2.01
  -1  -2  19   10.02    2.08
  -1   2  19   17.99    3.50
  -1  -2  19   11.42    2.94
   1  -2 -19    0.80    0.79
  -1   2  19   11.84    3.01
   1   2 -19    1.58    2.38
  -1  -2  19    9.53    2.93
   1  -2 -19   -1.23    2.07
  -1   2  19   13.78    3.00
   1  -2 -19   16.35    3.89
  -1  -2  19    8.51    2.72
   1   2 -19    8.43    3.24
  -1  -2  18    7.34    2.89
   1   2 -18    1.43    2.80
  -1   2  18    5.71    2.82
   1  -2 -18    7.06    3.26
  -1   2  18    4.27    2.50
  -1  -2  18    6.09    2.90
   1  -2 -18    4.07    1.63
  -1   2  18    2.81    1.54
  -1  -2  18    2.81    1.78
   1  -2 -17    2.04    2.35
   1  -2 -17   -1.62    3.32
   1   2 -17   -0.51    2.89
  -1  -2  17   -2.75    2.58
  -1   2  17   -0.93    2.31
   1  -2 -17    0.87    1.31
  -1  -2  17    4.44    2.66
  -1   2  17    3.51    2.70
  -1   2  17    0.26    1.38
  -1  -2  17    2.20    1.62
   1   2 -16  267.91   24.02
  -1  -2  16  203.60   23.37
  -1  -2  16  104.74   21.56
  -1   2  16  217.42   23.75
   1  -2 -16  249.01   23.97
  -1   2  16  149.66   22.54
   1   2 -16  215.75   24.28
   1  -2 -16  248.75   24.54
  -1  -2  16  284.28   20.85
  -1   2  16  262.95   20.36
   1   2 -16  229.45   21.52
  -1  -2  16  266.72   21.46
   1  -2 -16  234.73   21.73
  -1   2  16  294.49   21.85
   1  -2 -16  241.88   21.90
  -1   2  16  272.13   21.79
   1  -2 -16  234.08   20.38
  -1  -2  16  266.70   21.69
  -1   2  16  254.28   24.55
  -1  -2  16  244.81   24.38
   1   2 -15   46.74    8.42
   1  -2 -15   70.66    9.72
  -1  -2  15   58.31    9.40
  -1   2  15   64.89    9.87
   1  -2 -15   56.51    9.34
   1   2 -15   74.76   10.99
  -1  -2  15   72.17    7.20
  -1   2  15   74.29    6.96
   1  -2 -15   59.34    8.08
  -1  -2  15   60.03    7.53
  -1   2  15   63.84    7.68
   1   2 -15   65.87    7.93
   1  -2 -15   80.13    8.72
  -1   2  15   70.73    7.95
   1  -2 -15   66.57    6.91
  -1  -2  15   78.32    8.06
  -1  -2  15   58.94    9.52
  -1   2  15   48.46    8.96
  -1   2  14  129.17   14.20
   1  -2 -14  105.09   13.28
  -1  -2  14  127.17   14.19
   1   2 -14   97.61   12.77
   1  -2 -14  124.69   14.20
   1   2 -14  131.19   15.22
  -1  -2  14  104.18   12.58
  -1   2  14  121.19   10.91
  -1  -2  14  111.14   10.91
  -1   2  14  126.05   11.69
  -1  -2  14  121.58   11.58
   1  -2 -14  133.54   12.70
  -1   2  14  138.37   12.04
   1  -2 -14  105.95   10.80
  -1  -2  14  125.14   11.77
  -1   2  14   94.52   13.17
  -1  -2  14  112.46   13.77
  -1  -2  13   -0.85    2.89
   1   2 -13    2.28    2.85
   1  -2 -13    1.62    2.95
  -1   2  13    0.86    2.91
   1   2 -13    0.52    1.54
   1  -2 -13    3.51    2.86
   1   2 -13    7.36    3.82
  -1  -2  13    0.30    1.63
   1  -2 -13    0.55    2.24
  -1  -2  13   -0.86    3.03
  -1   2  13    5.20    3.36
  -1  -2  13    2.94    2.12
   1  -2 -13    1.85    1.59
  -1   2  13    0.84    1.86
  -1  -2  13    0.79    1.96
  -1  -2  13   -0.67    2.35
  -1   2  13    1.59    1.87
  -1  -2  12  102.74   12.02
  -1   2  12  111.66   11.73
   1  -2 -12  142.84   13.76
   1   2 -12  139.20   14.51
  -1  -2  12  101.32   11.12
   1   2 -12  105.77   11.50
   1  -2 -12  117.83   10.83
  -1  -2  12  115.85   11.30
  -1   2  12  140.00   11.68
   1  -2 -12  128.73   12.10
   1   2 -12  115.43   12.70
   1  -2 -12  128.83   13.15
  -1  -2  12  125.74   13.46
  -1   2  12  110.93   13.02
   1   2 -11   25.49    5.58
  -1  -2  11   30.62    4.98
  -1  -2  11   31.73    4.53
   1   2 -11   35.94    4.75
   1  -2 -11   31.72    5.71
   1   2 -11   27.10    5.09
   1  -2 -11   40.63    6.04
  -1  -2  10  444.36   35.22
   1   2 -10  515.57   37.62
   1  -2 -10  406.87   34.16
  -1  -2  10  410.23   35.41
   1   2 -10  404.81   35.03
  -1   2  10  391.49   34.54
   1  -2 -10  479.50   36.49
  -1  -2   9    9.55    2.60
   1   2  -9   10.98    3.41
   1  -2  -9    9.77    2.87
   1   2  -9    5.31    1.97
   1  -2  -9    8.26    1.63
  -1   2   9   12.19    2.22
   1   2  -8  250.73   21.60
  -1  -2   8  232.54   20.47
   1  -2  -8  272.51   21.07
  -1   2   8  214.92   19.64
   1  -2  -8  239.71   19.42
   1   2  -8  238.16   20.25
   1   2  -7    0.84    1.43
  -1  -2   7    0.67    1.83
   1  -2  -7    1.64    0.87
   1  -2  -7    4.80    2.02
   1   2  -6   32.16    3.84
  -1  -2   6   24.33    3.99
   1  -2  -6   33.13    3.09
   1  -2  -6   33.91    4.07
   1  -2  -5    1.39    1.63
   1   2  -5   -0.27    1.70
   1  -2  -5    1.14    1.32
   1  -2  -5    0.69    0.54
   1   2  -5    0.44    1.25
   1   2  -4 1283.65  107.49
   1  -2  -4 1570.06  107.79
   1   2  -4 1405.33  107.40
   1  -2  -4 1267.79  107.15
   1   2  -3  520.37   46.15
   1  -2  -3  639.81   46.37
   1   2  -3  576.58   46.25
   1  -2  -3  590.15   45.92
   1  -2  -2 6581.63  457.40
   1   2  -2 4918.72  457.10
   1  -2  -2 6462.51  457.33
   1   2  -2 4884.49  457.16
   1   2  -2 6291.33  457.45
   1  -2  -2 6225.61  456.83
   1   2  -1 2489.70  203.94
   1  -2  -1 2638.90  203.85
   1  -2  -1 2766.20  203.77
   1   2  -1 2443.69  203.75
   1   2  -1 2385.14  203.67
   1   2  -1 2497.41  203.86
   1  -2  -1 2638.99  203.74
   1  -2  -1 2714.49  203.91
   1  -2  -1 2564.42  203.76
   1   2  -1 2699.91  203.89
   1  -2  -1 2697.80  203.08
  -1  -2   1 2604.20  203.71
  -1   2   1 2583.50  203.06
   1  -2   0 9999.00  754.29
   1   2   0 9775.57  754.08
   1   2   0 9553.08  754.23
   1  -2   0 9700.97  754.12
   1   2   0 9628.93  754.27
   1  -2   0 9979.82  754.20
   1   2   0 9563.64  754.20
   1  -2   0 9125.24  754.14
   1  -2   0 9915.72  754.11
  -1  -2   0 9571.81  753.88
   1  -2   1 1007.10   71.53
   1   2   1  997.89   71.51
   1   2   1  907.88   71.23
   1  -2   1  932.42   71.39
   1  -2   1  952.60   71.32
   1   2   1  924.71   71.14
   1  -2   1  940.60   71.20
   1   2   1  905.20   71.36
   1   2   1  913.09   71.44
   1  -2   1  857.24   71.35
  -1   2  -1  824.86   70.54
  -1  -2  -1  928.79   70.85
   1   2   2 8868.22  681.67
   1   2   2 8610.81  681.91
   1   2   2 9199.47  681.63
   1  -2   2 8946.60  681.70
   1  -2   2 8712.27  681.91
   1   2   2 9407.37  681.92
   1  -2   2 8972.08  681.96
   1   2   2 8715.02  681.87
   1  -2   2 8572.23  681.63
   1  -2   2 8851.53  681.94
   1   2   2 8445.49  681.83
   1  -2   2 8453.37  681.87
  -1   2  -2 8384.23  681.24
  -1  -2  -2 8711.44  681.10
   1   2   3  100.03    9.22
   1  -2   3  115.97    9.44
   1  -2   3  104.06    9.42
   1   2   3  114.63    9.41
   1  -2   3  108.48    9.37
   1   2   3  116.84    9.38
   1  -2   3  108.12    9.37
   1   2   3   95.60    9.21
  -1  -2  -3   91.24    8.21
   1  -2   3  110.78    9.42
  -1   2  -3  108.75    8.83
   1  -2   3   99.31    8.46
   1  -2   4 4442.71  325.15
   1   2   4 4639.77  325.11
   1  -2   4 4104.99  324.98
   1   2   4 4395.39  324.99
   1   2   4 4688.00  325.08
   1  -2   4 4139.43  324.96
   1   2   4 4380.00  325.00
   1  -2   4 4197.06  325.05
  -1   2  -4 4164.77  324.50
   1  -2   4 3485.69  323.75
  -1   2  -4 4518.86  324.88
   1  -2   4 4831.44  325.21
  -1  -2  -4 4162.92  324.69
   1  -2   5  165.18   14.51
   1   2   5  187.60   14.70
   1  -2   5  187.42   14.74
   1  -2   5  181.69   14.88
   1   2   5  167.21   14.43
   1   2   5  173.86   14.51
   1  -2   5  174.68   14.60
   1   2   5  147.54   14.22
  -1   2  -5  172.82   14.02
   1  -2   5  170.37   14.42
   1  -2   5  136.51   12.88
  -1   2  -5  154.48   13.99
  -1  -2  -5  172.04   14.15
   1   2   6   89.88    8.89
   1  -2   6   85.12    8.97
   1   2   6   88.14    8.82
   1   2   6   86.13    8.97
   1  -2   6   89.49    8.98
   1  -2   6   90.54    9.18
   1   2   6   82.45    8.77
   1  -2   6   96.08    9.18
   1  -2   6   99.07    8.99
   1  -2   6   75.98    7.02
  -1   2  -6   86.32    8.35
  -1  -2  -6   97.72    8.61
   1   2   7   28.76    4.92
   1   2   7   42.27    5.57
   1  -2   7   39.09    5.72
   1   2   7   43.37    5.78
   1  -2   7   37.80    5.44
   1  -2   7   33.32    5.30
   1   2   7   24.41    4.66
   1  -2   7   30.94    5.17
  -1   2  -7   31.11    4.62
  -1  -2  -7   44.17    5.12
   1  -2   7   41.21    5.26
   1  -2   8 1408.49  114.32
   1  -2   8 1350.70  114.15
   1  -2   8 1549.38  114.57
   1   2   8 1401.47  114.04
   1   2   8 1380.97  114.04
   1   2   8 1343.05  114.11
   1   2   8 1355.71  114.04
   1  -2   8 1474.13  114.37
  -1  -2  -8 1444.71  113.41
  -1   2  -8 1444.91  113.20
  -1   2  -8 1536.34  113.66
   1  -2   8 1374.97  113.66
   1   2   9  266.53   27.75
   1   2   9  301.56   28.44
   1  -2   9  303.63   28.24
   1   2   9  307.31   28.38
   1  -2   9  290.58   28.15
   1  -2   9  324.31   28.69
  -1  -2  -9  354.65   27.75
  -1   2  -9  325.97   27.67
  -1   2  -9  328.48   27.18
   1  -2   9  319.28   27.82
   1   2   9  318.77   28.42
   1  -2   9  320.54   28.47
  -1  -2 -10    8.54    2.93
  -1   2 -10   12.41    3.08
  -1   2 -10   13.37    3.71
   1  -2  10   12.95    3.94
   1  -2  10    8.95    3.84
   1   2  10   11.96    4.26
   1  -2  10    6.48    3.51
   1  -2  10   12.67    4.13
   1   2  10   15.76    4.62
   1   2  10   11.11    4.03
   1   2  10    9.17    2.57
   1  -2  10   11.86    2.95
   1   2  10   11.98    3.92
   1  -2  10   11.47    4.44
  -1   2 -11   99.86   11.42
   1  -2  11   89.05   11.00
  -1  -2 -11  120.21   11.51
  -1   2 -11  101.31   10.51
  -1  -2 -11   99.78   10.17
   1  -2  11  101.20   12.15
   1   2  11   93.69   11.79
   1   2  11   82.36   11.45
   1   2  11   68.89   10.87
   1  -2  11   79.65   11.42
   1  -2  11   89.70   11.78
   1  -2  11   86.64    9.58
   1   2  11  100.07    9.84
   1   2  11   91.91    9.75
   1  -2  11   91.08    9.76
   1   2  11   95.80   12.12
   1  -2  11  104.66   12.39
   1  -2  12  419.59   37.77
   1   2  12  454.82   40.90
   1   2  12  423.59   37.79
   1  -2  12  493.72   41.35
   1  -2  12  389.19   36.48
   1  -2  12  436.17   36.79
  -1  -2 -12  524.29   38.75
  -1  -2 -12  538.47   40.32
  -1   2 -12  487.51   39.01
  -1   2 -12  478.38   40.52
   1  -2  12  399.41   39.51
   1   2  12  478.33   38.10
   1  -2  12  473.08   38.06
   1   2  12  539.69   38.69
   1  -2  12  439.12   38.08
   1   2  12  523.65   42.06
   1  -2  12  437.67   40.64
   1  -2  12  442.26   40.63
   1  -2  12  477.41   41.32
   1   2  12  428.55   40.57
   1   2  12  456.51   40.84
   1  -2  13   24.14    6.11
   1  -2  13   24.40    6.09
   1   2  13   18.98    5.46
   1   2  13   22.39    6.23
   1   2  13    8.09    5.09
   1  -2  13   18.91    5.44
  -1   2 -13   20.19    4.37
  -1  -2 -13   17.78    3.88
  -1   2 -13   30.19    6.14
  -1  -2 -13   20.96    4.88
   1  -2  13   13.51    2.77
   1  -2  13   20.49    3.31
   1  -2  13   18.99    5.04
   1  -2  13   21.66    4.36
   1   2  13   29.91    4.82
   1   2  13   16.17    4.07
   1  -2  13   19.98    4.25
   1  -2  13   29.23    6.34
   1  -2  13   19.55    4.42
   1   2  13   20.70    4.31
   1   2  13   25.88    6.17
   1   2  14   37.31    8.06
   1  -2  14   34.73    7.62
   1  -2  14   38.18    5.96
   1   2  14   46.70    6.10
   1   2  14   48.39    6.46
   1  -2  14   34.84    5.68
   1   2  14   46.20    8.41
   1  -2  14   32.13    7.50
   1   2  14   29.94    7.28
   1  -2  14   28.16    7.42
   1   2  14   20.99    6.71
   1  -2  14   36.37    7.73
   1  -2  14   32.04    4.45
   1   2  14   39.82    4.90
   1  -2  14   40.05    4.91
   1  -2  14   46.95    6.12
   1   2  14   36.19    5.78
   1  -2  14   40.65    5.68
   1  -2  14   33.09    5.70
   1   2  14   43.95    6.19
  -1   2 -14   37.95    6.16
  -1   2 -14   51.47    8.63
  -1  -2 -14   46.92    7.57
  -1  -2 -14   37.97    5.77
   1   2  15  173.87   15.99
   1  -2  15  165.09   15.21
   1   2  15  158.96   15.18
   1  -2  15  173.71   18.80
   1  -2  15  164.11   15.54
   1   2  15  154.98   18.21
   1   2  15  145.44   17.85
   1   2  15  142.69   17.94
   1   2  15  143.87   17.85
   1  -2  15  136.28   17.56
   1  -2  15  120.71   17.15
   1  -2  15  160.23   18.42
   1  -2  15  141.42   13.48
   1   2  15  143.69   14.84
   1  -2  15  152.22   15.04
   1  -2  15  143.91   14.60
   1  -2  15  172.65   15.64
   1   2  15  179.52   15.71
  -1   2 -15  149.47   17.98
  -1  -2 -15  153.16   17.03
  -1   2 -15  144.71   15.52
   1  -2  16    6.28    2.02
   1   2  16    8.42    3.57
   1  -2  16   10.01    3.38
   1  -2  16    0.50    2.24
   1  -2  16    7.88    3.16
   1   2  16    4.28    3.24
   1  -2  16    6.84    3.19
   1  -2  16   12.09    3.57
   1   2  16    8.89    3.38
   1   2  16    8.80    3.77
   1  -2  17   11.93    2.47
   1   2  17   12.15    3.60
   1  -2  17   12.70    3.28
   1  -2  17   12.62    3.75
   1   2  17   15.39    4.06
   1  -2  17   10.94    3.74
   1   2  17   19.17    4.36
   1   2  17   19.50    4.32
   1   2  17   13.59    3.92
   1  -2  17   12.27    3.75
   1  -2  17   15.49    3.87
   1  -2  18   50.84    5.55
   1  -2  18   69.05    7.39
   1   2  18   73.61    7.51
  -1  -2 -18   58.29    5.97
   1   2  18   61.99    7.40
   1  -2  18   50.97    7.04
  -1   2 -18   35.84    5.22
   1  -2  18   64.82    7.42
   1   2  18   65.22    7.47
   1  -2  18   63.36    7.11
   1   2  18   64.85    7.23
   1   2  18   61.00    6.82
   1  -2  18   62.48    6.74
   1   2  19    0.80    2.36
  -1  -2 -19    0.72    2.46
   1  -2  19    3.97    2.45
  -1   2 -19   -0.36    2.33
   1  -2  19    2.15    1.66
   1   2  19    3.16    2.07
   1   2  19    0.44    2.17
  -1  -2 -19    2.51    1.35
   1  -2  19    3.51    2.33
   1   2  19    3.13    2.52
   1  -2  19   -0.43    2.15
   1   2  19    3.52    2.52
   1  -2  19    4.20    2.46
  -1   2 -20   -0.44    1.08
   1   2  20   -0.26    1.50
   1   2  20   -1.86    2.14
  -1  -2 -20    1.15    2.06
  -1   2 -20    0.29    1.90
   1  -2  20   -0.61    1.93
   1   2  20   -0.34    1.84
   1   2  20    0.90    1.78
   1  -2  20    1.30    1.91
   1  -2  20    0.29    1.74
   1   2  20   -1.04    1.78
  -1  -2 -20    0.32    0.91
   1  -2  20    0.68    1.75
  -1   2 -21   -0.58    1.31
   1  -2  21    1.16    1.34
   1   2  21   -0.20    1.22
  -1  -2 -21    0.76    1.34
   1   2  21   -0.19    1.10
   1  -2  21    1.60    1.14
  -1  -3  21   20.68    2.01
  -1  -3  21   27.18    2.83
   1   3 -21   19.64    2.65
  -1   3  21   20.37    2.45
   1  -3 -21   24.83    2.88
  -1   3  21    8.11    1.76
  -1   3  21   10.20    1.99
  -1  -3  21   18.74    2.58
  -1   3  21    3.96    1.57
  -1  -3  21   12.48    2.19
   1   3 -21   -0.88    1.45
   1  -3 -21    1.30    1.45
  -1   3  21   13.58    2.27
  -1  -3  20    0.38    1.29
  -1   3  20    0.14    0.94
  -1   3  20   -0.33    1.65
  -1  -3  20   -0.99    1.73
  -1   3  20   -0.30    1.66
   1   3 -20    0.31    1.68
  -1  -3  20    0.66    1.66
  -1   3  20    1.36    1.78
  -1  -3  20   -0.29    1.72
   1  -3 -20    0.32    1.72
  -1  -3  20    0.30    1.87
  -1   3  20    3.94    2.11
   1   3 -20    0.65    2.15
   1  -3 -20    2.38    2.35
  -1  -3  19    5.44    1.85
  -1   3  19    4.37    1.51
   1   3 -19    5.65    2.90
  -1   3  19    3.73    2.17
   1  -3 -19    3.46    2.80
  -1  -3  19    5.12    2.42
   1  -3 -19    3.71    1.40
  -1   3  19    2.43    2.10
  -1  -3  19    6.80    2.33
   1  -3 -19   -0.40    2.02
  -1  -3  19    2.44    2.31
  -1  -3  19    5.76    2.59
   1   3 -19   -0.76    1.91
  -1   3  19    1.12    2.35
  -1   3  19    5.49    2.59
   1  -3 -18    1.72    1.99
   1   3 -18    5.08    3.10
   1  -3 -18    0.50    3.14
  -1  -3  18    0.41    2.21
  -1   3  18    3.81    2.26
  -1   3  18    0.46    2.12
  -1  -3  18    5.85    2.58
   1  -3 -18    3.27    1.67
  -1   3  18    1.84    1.16
  -1  -3  18    1.18    1.70
  -1   3  18    5.17    1.65
   1  -3 -17    4.20    2.66
   1   3 -17    5.45    3.13
  -1  -3  17   -0.45    2.45
   1  -3 -17    8.15    3.79
  -1   3  17    2.72    2.63
   1  -3 -17    2.19    1.72
  -1   3  17    1.95    2.48
  -1  -3  17    0.48    2.44
  -1   3  17    1.51    1.49
  -1  -3  17    5.64    2.24
   1  -3 -16   -2.09    2.95
   1   3 -16   -1.17    3.11
  -1  -3  16   -1.39    2.02
  -1   3  16    0.54    1.56
  -1  -3  16    1.82    2.34
   1   3 -16    3.55    2.97
  -1   3  16   -0.46    2.34
   1  -3 -16    7.80    3.51
   1  -3 -16   -0.58    2.50
  -1   3  16    2.49    2.38
   1  -3 -16   -0.34    1.62
  -1  -3  16   -0.98    2.34
  -1  -3  16   -1.02    3.17
  -1   3  16    1.03    2.38
   1  -3 -15   -1.93    3.14
   1   3 -15   -1.76    3.20
  -1   3  15   -2.98    3.23
  -1  -3  15    2.94    3.32
   1  -3 -15   -1.01    2.52
   1   3 -15   -1.19    2.96
  -1   3  15    0.57    1.51
  -1  -3  15    0.35    2.02
  -1  -3  15    0.48    1.26
  -1   3  15    0.45    2.37
   1   3 -15   -1.49    2.76
   1  -3 -15    2.19    3.04
  -1  -3  15   -0.89    2.34
   1  -3 -15   -1.20    2.82
   1  -3 -15    0.35    1.57
  -1  -3  15   -0.96    2.34
  -1   3  15   -0.97    1.99
  -1   3  15    1.00    3.40
  -1  -3  15    4.95    3.72
  -1  -3  14  668.11   58.67
  -1   3  14  662.30   58.71
   1   3 -14  673.25   58.20
   1  -3 -14  657.29   58.44
   1   3 -14  727.10   60.36
   1  -3 -14  764.40   59.37
   1   3 -14  531.43   56.28
  -1  -3  14  625.73   57.56
  -1   3  14  759.05   55.44
   1  -3 -14  739.37   57.07
  -1  -3  14  682.02   58.81
  -1   3  14  708.18   59.07
  -1  -3  14  757.76   56.47
   1  -3 -14  683.14   55.52
  -1   3  14  654.29   56.13
  -1   3  14  742.09   56.31
  -1  -3  14  667.77   55.95
  -1   3  13    2.59    2.74
  -1  -3  13    5.98    3.45
   1   3 -13    6.88    3.25
   1  -3 -13    9.21    3.64
  -1  -3  13    3.95    2.29
  -1   3  13   10.36    2.75
  -1  -3  13    2.86    2.38
   1   3 -13   10.67    4.73
   1   3 -13    2.90    2.37
   1  -3 -13    9.33    3.60
   1  -3 -13    8.73    3.24
   1  -3 -13    6.66    2.05
  -1  -3  13   11.77    2.87
  -1   3  13    6.78    2.45
  -1  -3  13   10.35    3.84
  -1   3  13   18.30    4.73
   1   3 -12   -0.54    1.83
  -1  -3  12   -0.39    1.43
   1  -3 -12    1.50    2.34
   1   3 -12    0.97    2.87
  -1  -3  12   -0.64    2.09
   1  -3 -12   -0.99    1.97
  -1   3  12    0.77    1.74
  -1  -3  12    1.91    1.97
   1  -3 -12    1.57    1.48
   1  -3 -12   -2.27    2.57
   1   3 -12    0.69    2.16
  -1   3  12    0.78    2.44
  -1  -3  12    2.33    2.62
   1   3 -11  378.97   35.45
   1  -3 -11  511.13   37.29
   1   3 -11  473.75   38.14
  -1  -3  11  407.65   35.11
  -1  -3  11  411.68   36.04
   1  -3 -11  446.03   35.59
   1  -3 -11  429.24   34.63
  -1   3  11  414.82   34.95
  -1  -3  11  380.32   34.25
  -1   3  11  458.33   37.30
   1   3 -11  433.86   36.51
   1  -3 -11  489.41   37.26
   1  -3 -10  129.84   12.57
   1   3 -10  103.25   11.91
   1   3 -10  133.06   13.40
   1  -3 -10  136.58   12.51
  -1  -3  10   98.36   11.50
   1   3 -10  110.90   11.49
  -1  -3  10  121.91   11.38
   1  -3 -10  121.04   10.72
   1   3  -9 1282.94   98.81
   1  -3  -9 1324.35   97.90
   1  -3  -9 1194.61   95.86
  -1  -3   9 1205.03   97.05
   1   3  -9 1143.42   97.10
   1   3  -9 1269.29   97.83
   1   3  -8  150.02   13.76
  -1   3   8  134.07   12.64
  -1  -3   8  159.11   13.83
   1   3  -8  173.96   15.28
   1  -3  -8  153.24   12.54
   1  -3  -8  166.40   14.16
   1  -3  -7   67.69    6.37
   1  -3  -7   59.21    4.98
   1   3  -7   52.24    6.00
   1   3  -7   58.77    6.93
  -1   3   7   49.19    5.05
  -1  -3   7   51.32    6.16
   1   3  -7   51.60    6.29
   1  -3  -6  723.92   54.20
   1   3  -6  660.90   54.18
   1   3  -6  637.89   54.85
  -1  -3   6  610.36   54.19
   1  -3  -6  670.01   52.89
   1   3  -6  681.40   54.32
   1  -3  -6  750.25   54.61
   1   3  -5   59.59    6.80
   1   3  -5   58.66    6.27
  -1  -3   5   50.68    6.36
   1  -3  -5   58.04    6.08
   1  -3  -5   63.02    5.04
   1  -3  -5   67.31    6.47
   1   3  -5   69.64    6.50
   1   3  -4  141.96   15.36
   1  -3  -4  182.20   14.93
   1   3  -4  185.50   15.40
   1  -3  -4  213.14   15.38
   1   3  -4  167.13   15.10
   1  -3  -3 1934.54  146.91
   1   3  -3 1906.23  147.49
   1  -3  -3 2044.27  147.29
   1   3  -3 1681.89  147.18
   1   3  -3 1815.87  147.20
   1  -3  -2  337.73   23.16
  -1  -3   2  316.57   23.68
  -1   3   2  236.07   22.68
   1   3  -2  300.98   23.58
   1  -3  -2  354.35   23.98
   1   3  -2  316.35   23.92
   1  -3  -2  325.13   23.64
   1   3  -2  312.80   23.68
   1  -3  -2  360.35   23.73
  -1  -3   1 2765.28  214.61
   1  -3  -1 2742.53  214.03
  -1   3   1 2749.61  214.06
   1  -3  -1 2926.99  214.66
   1  -3  -1 2890.14  214.78
   1  -3  -1 2889.58  214.66
   1   3  -1 2630.88  214.61
   1   3  -1 2541.74  214.75
   1   3  -1 2577.36  214.61
  -1   3   0 1168.11   88.32
   1  -3   0 1072.24   88.61
  -1  -3   0 1149.11   88.55
   1   3   0  999.79   89.03
   1   3   0 1170.57   88.61
   1   3   0 1187.41   88.83
   1  -3   0 1188.81   88.65
   1   3   0 1015.87   88.60
   1   3   0 1144.38   88.81
   1  -3   0 1184.94   88.84
   1  -3   0 1152.88   88.73
   1  -3   0 1054.76   88.69
   1  -3   1    6.29    1.77
   1  -3   1    3.97    1.86
   1   3   1    5.50    2.02
   1  -3   1    6.05    2.12
   1  -3   1    4.97    1.63
   1   3   1    6.20    1.86
   1   3   1    4.84    1.47
   1   3   1    4.29    1.79
   1  -3   1    4.68    1.89
   1  -3   1    3.86    1.83
  -1  -3  -1    7.01    1.49
  -1   3  -1    5.61    1.36
   1   3   2 8679.80  624.00
   1   3   2 8643.20  623.62
   1   3   2 8384.69  623.65
   1  -3   2 7124.02  623.82
   1  -3   2 8614.84  624.10
   1  -3   2 8247.22  623.69
   1   3   2 7846.07  623.86
   1   3   2 8205.35  623.97
   1  -3   2 7432.42  623.89
  -1   3  -2 7808.05  623.47
  -1  -3  -2 7741.64  623.26
   1  -3   2 7643.85  623.46
  -1   3  -2 8006.78  623.69
   1  -3   2 8111.70  623.95
   1  -3   3 1102.22   84.91
   1  -3   3 1072.90   84.89
   1  -3   3 1290.04   85.24
   1   3   3 1088.50   84.85
   1   3   3 1231.12   85.07
   1   3   3 1039.93   84.73
   1  -3   3 1043.58   84.87
   1   3   3 1041.02   84.77
  -1   3  -3 1171.58   84.69
  -1   3  -3 1126.40   84.71
  -1  -3  -3  968.43   83.96
   1  -3   3 1005.91   84.18
   1  -3   4  501.76   36.16
   1   3   4  495.70   36.05
   1  -3   4  456.96   35.98
   1   3   4  494.59   36.02
   1  -3   4  441.64   35.98
   1   3   4  461.69   35.87
   1  -3   4  425.16   35.89
   1   3   4  448.61   35.86
  -1   3  -4  489.41   35.79
  -1  -3  -4  356.31   34.69
   1  -3   4  426.91   34.99
   1  -3   4  463.25   36.15
  -1   3  -4  530.14   35.91
   1   3   5  880.10   70.84
   1   3   5  954.19   71.06
   1   3   5  947.23   70.99
   1  -3   5  802.31   70.83
   1  -3   5  899.87   71.12
   1  -3   5  913.36   71.09
   1   3   5  904.83   70.91
   1  -3   5  859.44   70.95
  -1   3  -5  928.53   70.75
   1  -3   5 1102.27   71.54
  -1  -3  -5  859.89   70.68
  -1   3  -5  953.15   70.71
   1  -3   5  777.22   69.65
   1  -3   6  280.15   23.94
   1   3   6  259.31   23.51
   1  -3   6  326.37   24.31
   1  -3   6  278.14   23.87
   1   3   6  258.54   23.59
   1   3   6  306.48   23.80
   1  -3   6  280.59   23.84
   1   3   6  275.85   23.60
  -1   3  -6  320.74   23.67
   1  -3   6  234.70   22.01
  -1   3  -6  277.94   23.21
   1  -3   6  287.32   23.79
  -1  -3  -6  292.18   23.39
   1   3   7  433.96   33.28
   1  -3   7  357.50   32.94
   1  -3   7  413.70   33.31
   1   3   7  371.10   32.82
   1  -3   7  401.62   33.35
   1   3   7  417.66   33.26
   1  -3   7  441.45   33.53
   1   3   7  406.50   33.11
   1  -3   7  421.28   33.21
  -1   3  -7  407.56   32.75
   1  -3   7  339.28   30.87
  -1  -3  -7  424.33   32.64
   1   3   8 5512.78  399.46
   1  -3   8 5248.41  399.46
   1  -3   8 4892.27  399.34
   1   3   8 4945.24  399.15
   1   3   8 5257.95  399.26
   1  -3   8 4450.87  398.93
  -1  -3  -8 5651.40  398.77
  -1   3  -8 5389.32  398.92
   1  -3   8 4318.06  398.61
   1   3   8 5169.16  399.20
   1  -3   8 5241.11  399.46
  -1   3  -9    3.00    2.59
  -1  -3  -9    2.13    2.13
  -1   3  -9    0.48    1.88
   1  -3   9    3.87    2.65
   1  -3   9    2.89    2.02
   1  -3   9    0.72    2.71
   1   3   9    2.72    3.07
   1  -3   9    2.86    2.77
   1   3   9    0.68    2.54
   1   3   9    1.36    2.93
   1  -3   9    1.48    2.61
   1   3   9    2.12    2.83
   1  -3   9    1.42    2.84
   1  -3  10 1204.52  100.60
  -1  -3 -10 1347.87  100.26
  -1   3 -10 1318.15   99.84
  -1   3 -10 1291.87  100.71
   1  -3  10 1260.13  101.20
   1  -3  10 1203.30  101.25
   1   3  10 1126.57  100.63
   1  -3  10 1231.01  101.24
   1   3  10 1156.21  100.99
   1   3  10 1319.49  101.35
   1  -3  10 1252.13   98.92
   1   3  10 1170.72   98.65
   1  -3  10 1255.87  101.29
   1   3  10 1247.09  101.09
   1   3  11  440.33   35.94
   1  -3  11  365.61   32.66
   1  -3  11  456.64   36.21
   1  -3  11  347.73   31.64
   1  -3  11  346.13   31.69
  -1   3 -11  395.91   33.79
   1  -3  11  439.77   35.34
  -1  -3 -11  438.48   33.70
  -1   3 -11  398.13   34.91
  -1  -3 -11  419.84   34.48
   1  -3  11  401.04   32.94
   1   3  11  368.01   32.66
   1  -3  11  424.92   33.26
   1   3  11  412.60   33.04
   1   3  11  386.00   35.37
   1   3  11  367.09   35.18
   1  -3  11  402.91   35.51
   1  -3  11  420.71   35.78
   1   3  11  379.56   35.23
   1  -3  11  439.02   36.14
   1  -3  12    5.26    3.62
   1  -3  12    3.04    3.08
   1   3  12    7.34    3.99
   1  -3  12   19.34    5.28
   1   3  12    8.08    3.73
   1   3  12    5.07    3.86
  -1   3 -12    9.29    3.18
  -1  -3 -12    2.32    2.49
  -1  -3 -12    7.57    2.76
  -1   3 -12   10.32    3.99
   1  -3  12    7.11    2.06
   1  -3  12   10.99    2.29
   1  -3  12    6.30    3.33
   1  -3  12   13.26    3.33
   1   3  12    7.03    2.82
   1   3  12    8.08    3.10
   1  -3  12   13.26    3.28
   1  -3  12    8.99    3.15
   1   3  12    8.04    2.91
   1  -3  12   16.46    4.87
   1   3  12   14.27    4.54
   1  -3  13   40.38    6.04
   1   3  13   37.13    5.82
   1  -3  13   25.75    6.75
   1   3  13   57.18    8.95
   1  -3  13   37.82    7.77
   1   3  13   46.48    8.47
   1   3  13   35.72    7.44
   1  -3  13   30.68    7.68
   1  -3  13   48.02    8.51
   1   3  13   38.03    7.93
   1  -3  13   40.05    4.87
   1  -3  13   44.48    5.09
   1   3  13   43.65    5.96
   1  -3  13   44.02    7.80
   1  -3  13   36.43    5.74
   1  -3  13   37.23    5.61
   1   3  13   38.89    5.82
   1  -3  13   49.93    6.37
  -1  -3 -13   45.85    7.18
  -1  -3 -13   45.48    6.05
  -1   3 -13   47.43    8.01
  -1   3 -13   44.08    6.61
   1  -3  14   17.46    5.65
   1   3  14   26.36    6.33
   1   3  14   29.49    6.97
   1  -3  14   22.50    6.16
   1   3  14   20.10    6.15
   1  -3  14   32.71    7.06
  -1  -3 -14   22.27    5.25
  -1  -3 -14   28.03    4.66
  -1   3 -14   21.45    4.95
  -1   3 -14   26.35    6.35
   1  -3  14   22.48    3.51
   1   3  14   19.18    4.47
   1  -3  14   15.55    4.91
   1  -3  14   24.98    4.86
   1  -3  14   22.35    4.23
   1  -3  14   29.46    5.03
   1   3  14   27.96    5.01
   1   3  14   32.15    5.41
   1  -3  14   17.10    4.62
   1  -3  14   17.89    5.67
   1  -3  14   19.94    4.52
   1   3  14   16.85    5.60
   1   3  14   33.92    5.15
   1   3  15   -1.24    3.30
   1  -3  15   -2.39    3.54
   1  -3  15   -1.22    3.43
   1   3  15   -1.21    2.80
   1  -3  15   -2.49    3.31
   1   3  15    1.27    3.37
  -1   3 -15    2.23    1.98
  -1   3 -15    1.18    3.13
  -1  -3 -15    1.96    3.19
   1  -3  15    1.88    1.86
   1  -3  15    1.98    2.51
   1  -3  15    2.23    2.92
   1   3  15   -0.56    2.91
   1   3  15    1.85    2.83
   1  -3  15    2.41    2.72
   1   3  15   -0.63    2.92
   1   3  15   -1.68    2.98
   1   3  15    1.25    3.32
   1  -3  15    2.75    2.88
   1  -3  15   -1.25    3.04
   1  -3  15    1.23    3.47
   1  -3  16   81.06    8.82
   1   3  16  108.24   10.65
   1  -3  16   91.24   10.18
   1  -3  16   94.73    9.99
   1  -3  16   94.88   10.44
   1   3  16  106.80   10.77
   1  -3  16   97.20   10.24
   1   3  16   96.36   10.34
   1   3  16   87.73   10.48
   1  -3  16   85.63   10.52
   1  -3  17   20.66    3.31
   1  -3  17   21.16    4.49
   1   3  17   25.15    4.65
   1   3  17   23.76    4.36
   1  -3  17   23.93    4.11
   1   3  17   21.84    4.55
   1  -3  17   22.63    4.74
   1  -3  17   20.16    4.42
   1   3  17   29.84    5.09
   1   3  17   33.11    5.31
   1  -3  17   18.82    4.49
   1  -3  18   15.89    2.35
   1   3  18   20.43    3.85
   1  -3  18   19.65    3.69
   1   3  18   21.04    3.56
   1  -3  18   19.37    3.07
   1   3  18   19.39    3.94
   1  -3  18   15.59    3.56
  -1  -3 -18   15.63    2.60
   1  -3  18   30.01    4.52
   1   3  18   25.42    4.00
   1   3  18   24.53    4.26
   1  -3  18   16.83    3.67
   1  -3  19   -0.32    0.66
   1  -3  19   -0.75    2.12
   1   3  19   -0.38    2.29
  -1   3 -19   -0.69    2.17
  -1  -3 -19   -0.69    2.38
   1   3  19    2.47    2.02
   1  -3  19    0.42    2.03
   1   3  19   -1.28    1.96
  -1  -3 -19   -1.16    1.33
   1   3  19   -0.37    2.14
   1  -3  19    1.63    2.10
   1   3  19   -1.26    2.09
   1  -3  19   -1.08    2.18
  -1   3 -20   14.84    2.19
   1   3  20   13.27    2.50
  -1  -3 -20   13.96    2.87
   1  -3  20   10.10    2.57
   1   3  20   12.34    2.68
  -1   3 -20    5.60    2.51
   1   3  20   10.86    2.51
  -1  -3 -20   10.73    1.83
   1  -3  20    7.84    2.41
   1   3  20   12.74    2.66
   1  -3  20   12.92    2.56
   1  -3  20   11.91    2.52
   1   3  20   12.47    2.73
   1  -4 -21   30.00    3.14
  -1   4  21   28.99    2.90
  -1  -4  21   31.95    3.07
   1   4 -21   20.81    2.85
  -1   4  21   12.36    2.47
  -1  -4  21   36.64    2.77
  -1   4  21   11.83    2.41
  -1  -4  21   11.54    2.43
  -1  -4  20    1.55    1.40
  -1   4  20    0.12    0.49
   1  -4 -20    0.77    0.56
  -1   4  20    1.49    1.70
  -1  -4  20    2.72    1.70
   1  -4 -20   -1.18    1.76
   1   4 -20   -0.28    1.55
  -1  -4  20   -1.83    1.59
  -1   4  20   -0.30    1.43
  -1  -4  20    0.30    1.49
  -1   4  20    1.63    1.89
   1  -4 -20    0.63    2.20
  -1  -4  20    3.00    1.79
  -1   4  20   -0.54    1.71
   1   4 -20    2.35    2.04
  -1  -4  19    7.66    2.09
  -1   4  19   10.79    1.80
  -1   4  19   10.75    2.76
  -1  -4  19    7.54    2.57
   1   4 -19    6.82    2.92
   1  -4 -19   10.39    3.33
   1  -4 -19    4.38    1.62
  -1  -4  19   12.03    2.76
  -1   4  19   11.34    2.89
  -1   4  19    9.05    2.65
  -1  -4  19    5.31    2.50
   1   4 -19    1.80    2.28
  -1   4  19    1.18    2.27
   1  -4 -19    0.39    2.27
  -1  -4  19    9.40    2.59
  -1   4  18    5.95    1.67
  -1  -4  18    4.62    2.13
   1   4 -18    3.99    3.32
   1  -4 -18    1.97    3.32
  -1  -4  18    2.38    2.44
  -1   4  18    2.01    2.41
   1  -4 -18    4.02    2.36
  -1  -4  18    7.33    2.68
  -1   4  18    6.98    2.51
  -1   4  18    5.49    1.51
   1  -4 -18    3.74    1.79
   1  -4 -18    0.91    2.47
  -1  -4  18    6.68    2.71
   1   4 -18    2.49    2.30
  -1   4  18    3.66    2.41
  -1   4  17   77.47    7.39
  -1  -4  17   79.43    8.48
   1  -4 -17   77.74    9.05
   1   4 -17   68.21    8.51
  -1   4  17   78.08    8.54
   1  -4 -17   64.92    8.53
  -1  -4  17   94.16    8.90
   1  -4 -17   73.53    7.77
  -1   4  17   63.54    7.37
  -1   4  17   92.32    8.98
  -1  -4  17   92.96    8.34
   1  -4 -16   10.58    3.57
  -1   4  16    9.97    3.13
   1   4 -16    6.50    3.27
   1  -4 -16   14.00    4.00
  -1  -4  16   13.86    3.44
  -1   4  16    7.79    2.77
   1  -4 -16   11.47    2.73
  -1  -4  16    8.66    2.95
  -1   4  16    9.25    2.30
  -1  -4  16    7.69    1.94
  -1   4  15  143.15   17.29
  -1  -4  15  125.58   16.99
  -1   4  15  111.43   16.84
   1  -4 -15  190.10   18.45
   1   4 -15  151.67   17.06
  -1  -4  15  198.31   18.68
   1  -4 -15  177.03   18.06
  -1  -4  15  143.14   16.78
  -1  -4  15  158.36   14.13
  -1   4  15  180.20   14.45
   1   4 -15  142.28   15.21
  -1   4  15  198.80   15.74
  -1  -4  15  179.92   15.46
   1  -4 -15  172.65   15.96
   1  -4 -15  164.77   16.00
   1  -4 -15  182.20   14.97
  -1   4  15  152.89   15.25
  -1  -4  15  168.01   15.42
  -1  -4  15  150.56   17.56
  -1   4  15  138.60   17.30
   1   4 -14    9.19    3.48
  -1   4  14    7.49    3.57
   1  -4 -14    8.41    3.56
  -1  -4  14    1.85    3.31
   1  -4 -14   10.94    3.79
   1   4 -14    6.85    3.92
   1   4 -14    7.45    2.91
  -1  -4  14    5.81    1.90
   1  -4 -14    9.98    3.46
  -1  -4  14    1.87    3.11
  -1   4  14    8.52    4.12
  -1  -4  14    6.35    2.80
  -1   4  14   11.47    3.05
   1  -4 -14    9.96    2.48
  -1  -4  14   10.61    3.13
  -1   4  14   10.73    3.11
   1  -4 -14    9.57    3.33
   1   4 -14   10.91    3.56
  -1  -4  14    9.84    3.67
  -1   4  13    1.73    2.58
  -1  -4  13   -0.86    2.55
   1  -4 -13    2.60    2.70
   1   4 -13   -0.77    2.18
   1   4 -13    1.94    1.92
   1   4 -13    1.07    2.86
   1  -4 -13    2.48    2.46
  -1  -4  13    3.04    2.47
  -1  -4  13    0.40    1.97
  -1   4  13    1.20    1.84
   1  -4 -13    1.64    2.30
   1  -4 -13    0.71    1.74
  -1  -4  13    1.69    1.77
  -1   4  13   -0.43    2.19
  -1  -4  13   -0.87    2.57
  -1   4  13   -0.88    2.60
   1   4 -12   14.04    3.70
   1  -4 -12    4.72    2.81
  -1   4  12    5.52    3.18
  -1  -4  12    5.46    2.98
   1   4 -12    6.87    3.36
   1   4 -12    6.05    2.46
  -1  -4  12    6.50    2.32
   1  -4 -12    4.39    2.53
  -1  -4  12    5.74    1.95
  -1  -4  12    4.80    2.63
  -1   4  12    7.32    2.38
   1  -4 -12   12.40    3.20
   1  -4 -12    8.46    2.21
  -1   4  12    3.88    2.19
  -1  -4  12    6.94    2.37
  -1   4  12    7.16    3.46
  -1  -4  11    1.53    1.54
   1  -4 -11    0.88    1.80
  -1  -4  11    2.43    1.63
   1  -4 -11   -0.32    1.42
  -1   4  11   -0.35    1.61
  -1  -4  11    1.83    1.81
  -1  -4  11    0.41    1.67
   1   4 -11    1.67    2.03
   1   4 -11    0.88    2.48
   1  -4 -11    0.64    2.09
   1  -4 -11   -0.71    2.39
   1   4 -11    1.89    2.05
  -1   4  11    0.71    2.20
  -1  -4  11    0.70    2.19
   1  -4 -10  237.89   18.74
   1  -4 -10  250.21   20.40
  -1  -4  10  191.61   19.65
   1   4 -10  233.56   21.36
  -1  -4  10  208.29   19.07
   1   4 -10  197.23   19.53
   1  -4 -10  239.06   20.61
   1   4 -10  195.55   19.76
   1  -4  -9   49.80    5.59
   1   4  -9   57.59    5.96
   1   4  -9   40.46    7.02
   1   4  -9   58.98    6.70
   1  -4  -9   62.66    6.88
  -1  -4   9   55.91    6.32
   1  -4  -9   68.32    7.45
   1   4  -9   44.85    6.39
  -1  -4   8   74.97    8.54
   1   4  -8   83.14    9.73
   1  -4  -8   92.09    8.96
   1   4  -8   85.42    8.88
   1  -4  -8   88.74    9.26
   1   4  -8   90.72    9.16
   1   4  -7  157.88   13.83
   1  -4  -7  163.97   13.70
   1  -4  -7  147.61   12.08
   1   4  -7  138.36   14.29
  -1  -4   7  131.26   13.29
   1   4  -7  153.46   13.75
   1  -4  -7  161.96   14.02
   1  -4  -6  206.76   17.69
   1  -4  -6  218.40   16.39
   1   4  -6  165.60   18.17
  -1  -4   6  177.01   17.63
   1   4  -6  190.04   17.90
   1  -4  -6  220.63   18.10
   1   4  -6  203.58   17.90
  -1  -4   5  392.90   35.06
   1  -4  -5  466.75   34.98
   1   4  -5  447.88   35.44
   1   4  -5  391.73   34.98
   1  -4  -5  457.54   35.21
   1   4  -4 1488.83  113.81
   1  -4  -4 1424.05  112.99
   1  -4  -4 1571.53  113.36
   1   4  -4 1304.07  113.14
   1  -4  -3   14.32    1.93
   1   4  -3   12.23    2.38
   1  -4  -3   11.99    2.28
   1   4  -3   14.85    2.33
   1  -4  -3   11.11    2.28
  -1  -4   2  329.72   26.40
   1  -4  -2  322.95   25.88
  -1   4   2  312.06   25.83
   1  -4  -2  354.00   26.31
   1   4  -2  348.85   26.43
   1  -4  -2  306.20   26.20
   1   4  -2  304.26   26.48
   1  -4  -2  361.24   26.55
   1   4  -2  298.29   26.20
  -1   4   1  839.41   69.91
  -1  -4   1  964.91   70.45
   1   4  -1  946.35   71.21
   1   4  -1  857.76   70.25
   1  -4  -1  937.10   70.38
   1  -4  -1  896.39   70.24
   1   4  -1  960.49   70.38
   1   4  -1  829.53   70.35
   1  -4  -1  870.54   70.21
  -1  -4   0 2321.84  176.02
   1   4   0 2312.73  176.88
  -1   4   0 2344.35  175.85
   1  -4   0 2242.03  176.04
   1   4   0 2132.07  175.93
   1  -4   0 2141.21  176.03
   1  -4   0 2296.20  175.92
   1   4   0 2144.46  175.84
   1   4   0 2378.36  176.19
   1  -4   0 2319.63  176.15
   1  -4   0 2249.16  175.98
   1   4   0 2177.06  176.03
   1  -4   1  944.17   73.50
  -1   4  -1  969.54   73.40
  -1  -4  -1  994.70   73.40
   1  -4   1  988.61   73.64
   1   4   1  943.87   73.28
   1   4   1  904.71   73.56
   1  -4   1  836.27   73.48
   1  -4   1  916.31   73.61
   1  -4   1  954.30   73.32
   1   4   1  892.90   73.17
   1  -4   1  874.57   73.22
   1   4   1  986.98   73.64
   1  -4   2 2279.19  176.79
  -1  -4  -2 2304.56  176.58
   1  -4   2 2379.85  177.22
  -1   4  -2 2284.58  176.87
   1  -4   2 2078.45  177.02
   1   4   2 2337.89  177.10
   1   4   2 2087.14  176.92
   1   4   2 2367.12  176.67
   1  -4   2 2227.95  177.12
   1   4   2 2445.33  177.14
   1  -4   2 2034.85  176.95
   1  -4   3 2207.97  172.01
   1  -4   3 2535.14  172.89
  -1   4  -3 2275.73  172.32
  -1  -4  -3 2200.72  171.76
  -1   4  -3 2288.83  172.33
   1   4   3 2264.46  172.46
   1  -4   3 2028.34  172.42
   1   4   3 2137.48  172.32
   1   4   3 2044.48  172.35
   1  -4   3 2250.64  172.59
   1  -4   3 2043.42  172.39
   1  -4   3 2232.71  172.55
   1   4   3 2141.47  172.39
   1  -4   4   95.26    8.37
  -1   4  -4  105.91    9.10
  -1   4  -4  102.00    8.94
  -1  -4  -4   86.48    8.04
   1  -4   4   85.41    8.90
   1   4   4   98.14    8.96
   1  -4   4   91.04    8.97
   1   4   4   94.87    8.84
   1  -4   4   99.51    9.16
   1   4   4   99.92    9.01
   1   4   4   95.96    8.98
   1  -4   4   86.63    8.92
   1  -4   5    6.39    1.61
  -1   4  -5    7.78    2.08
  -1   4  -5    7.76    2.36
  -1  -4  -5    7.02    2.23
   1  -4   5   10.13    2.72
   1   4   5    6.72    2.10
   1  -4   5    8.07    2.43
   1  -4   5    8.12    2.66
   1   4   5    7.74    2.26
   1  -4   5    5.57    2.30
   1   4   5    7.93    2.31
   1   4   5    5.66    2.10
  -1   4  -6 1274.13   97.27
  -1   4  -6 1315.34   97.77
   1  -4   6 1378.05   98.29
  -1  -4  -6 1236.62   97.33
   1  -4   6 1100.85   96.16
   1  -4   6 1244.96   97.86
   1   4   6 1171.52   97.37
   1   4   6 1133.33   97.35
   1   4   6 1278.23   97.57
   1   4   6 1239.32   97.61
   1  -4   6 1133.48   97.54
   1  -4   6 1306.42   98.03
   1  -4   6 1334.74   98.00
  -1   4  -7  456.69   35.87
   1  -4   7  393.94   33.95
  -1  -4  -7  419.54   35.28
   1  -4   7  505.13   36.55
  -1   4  -7  445.74   35.28
   1  -4   7  447.63   36.12
   1   4   7  413.43   35.62
   1   4   7  408.40   35.53
   1  -4   7  434.79   36.09
   1   4   7  385.74   35.48
   1   4   7  430.76   35.68
   1  -4   7  430.23   35.96
   1  -4   7  397.01   35.79
   1  -4   8  575.21   53.48
  -1   4  -8  740.47   56.07
   1  -4   8  764.01   56.47
  -1  -4  -8  783.99   55.74
   1   4   8  683.15   55.88
   1  -4   8  698.42   56.27
   1   4   8  722.83   56.01
   1   4   8  742.07   56.25
   1  -4   8  692.77   56.21
   1  -4   8  662.96   56.25
   1  -4   8  667.86   56.09
   1   4   8  665.95   55.84
   1  -4   9  182.31   16.89
  -1  -4  -9  189.69   16.22
  -1   4  -9  191.46   16.81
   1  -4   9  156.00   14.88
   1   4   9  155.28   14.70
   1   4   9  181.51   16.89
   1  -4   9  163.96   16.82
   1  -4   9  183.24   17.38
   1   4   9  164.96   16.62
   1  -4   9  142.90   16.34
   1   4   9  168.50   16.52
   1  -4   9  141.10   16.42
   1   4   9  166.74   16.57
  -1   4 -10  792.86   64.83
   1  -4  10  722.60   65.61
  -1  -4 -10  890.57   65.47
  -1   4 -10  752.60   65.59
   1  -4  10  853.00   66.55
   1  -4  10  820.96   66.46
   1   4  10  817.12   66.24
   1  -4  10  764.20   65.98
   1   4  10  762.90   65.80
   1   4  10  811.76   66.03
   1   4  10  751.46   63.68
   1  -4  10  807.79   63.94
   1   4  10  761.31   65.86
   1  -4  10  791.70   66.28
   1  -4  11  344.12   29.15
   1   4  11  303.39   25.85
   1   4  11  314.49   28.59
   1  -4  11  275.69   25.82
   1   4  11  341.62   28.89
   1   4  11  293.03   28.37
   1  -4  11  302.01   28.61
   1  -4  11  291.33   28.36
   1   4  11  268.89   27.82
   1  -4  11  329.96   28.95
   1  -4  11  268.16   24.88
   1  -4  11  291.72   24.93
   1  -4  11  314.68   26.02
   1   4  11  307.75   25.84
   1   4  11  300.86   25.95
   1  -4  11  300.21   26.07
  -1   4 -11  318.85   28.23
   1  -4  11  345.81   28.68
  -1  -4 -11  329.88   27.58
  -1   4 -11  307.99   27.10
   1   4  12  271.22   24.10
   1  -4  12  309.72   27.47
   1  -4  12  257.87   23.92
   1   4  12  318.84   27.66
   1   4  12  260.68   26.70
   1   4  12  278.19   26.91
   1  -4  12  271.90   26.66
   1   4  12  267.21   26.73
   1  -4  12  261.57   26.88
   1  -4  12  269.75   26.82
   1  -4  12  238.04   22.93
   1  -4  12  313.95   23.28
   1   4  12  264.60   24.00
   1  -4  12  252.24   23.90
   1  -4  12  259.32   23.74
   1  -4  12  266.10   24.20
   1   4  12  320.67   24.69
   1  -4  12  275.26   26.50
  -1  -4 -12  290.50   24.65
  -1   4 -12  303.37   26.94
  -1  -4 -12  317.30   26.22
  -1   4 -12  273.08   25.23
   1   4  13  368.70   30.62
   1   4  13  397.66   31.25
   1  -4  13  355.51   33.66
   1  -4  13  331.07   30.62
   1   4  13  355.51   33.73
   1  -4  13  347.62   30.43
   1  -4  13  329.31   29.30
   1  -4  13  384.69   30.69
   1   4  13  393.74   30.80
   1   4  13  326.23   33.16
   1   4  13  374.99   34.04
   1  -4  13  342.48   33.61
   1  -4  13  354.34   33.54
   1  -4  13  307.57   32.98
   1   4  13  313.90   32.91
   1  -4  13  335.47   30.09
   1   4  13  364.90   30.82
   1  -4  13  355.70   30.73
  -1  -4 -13  344.02   32.10
  -1   4 -13  357.44   33.30
   1  -4  13  330.25   32.80
  -1   4 -13  348.98   31.75
  -1  -4 -13  420.34   31.24
   1   4  14  493.76   38.84
   1  -4  14  454.97   41.94
   1  -4  14  484.85   39.29
   1  -4  14  464.53   38.61
   1   4  14  472.39   42.22
   1   4  14  531.34   39.53
   1   4  14  450.83   42.10
   1  -4  14  434.39   41.75
   1  -4  14  433.58   41.50
   1   4  14  421.58   41.52
   1   4  14  404.97   41.26
   1  -4  14  391.63   41.12
   1  -4  14  422.45   37.28
   1  -4  14  498.63   38.81
   1   4  14  460.28   38.61
   1  -4  14  438.63   38.12
   1  -4  14  497.15   39.05
   1   4  14  486.86   39.06
  -1  -4 -14  492.05   40.88
  -1   4 -14  421.74   41.23
   1  -4  14  390.98   40.59
  -1   4 -14  434.28   39.71
   1  -4  15    2.41    3.40
   1   4  15    1.20    2.98
   1   4  15    5.03    4.09
   1  -4  15    3.51    3.11
   1   4  15    3.69    3.84
  -1   4 -15    2.34    2.44
  -1  -4 -15   -0.97    4.28
  -1   4 -15   -1.11    2.55
   1  -4  15    3.34    1.51
   1  -4  15    3.84    2.48
   1   4  15    4.47    2.68
   1  -4  15    0.95    2.18
   1  -4  15    1.19    2.58
   1   4  15    0.61    2.86
   1   4  15   -1.24    4.51
   1  -4  15    7.35    2.77
   1  -4  15   -3.65    4.71
   1   4  15    1.25    2.28
   1  -4  15    4.33    2.34
   1   4  15    2.77    2.50
   1  -4  16   31.07    4.26
   1   4  16   34.49    5.71
   1  -4  16   34.88    5.41
   1   4  16   26.36    5.08
   1  -4  16   34.62    5.68
   1   4  16   34.20    5.73
   1  -4  16   31.01    5.57
   1  -4  16   36.87    5.58
   1   4  16   22.18    4.90
   1  -4  17    2.31    1.72
   1  -4  17   -2.00    2.65
   1   4  17   -0.51    2.78
   1   4  17   -1.92    2.47
  -1  -4 -17    1.79    1.99
   1  -4  17    3.28    2.86
   1   4  17    1.11    2.51
   1   4  17    0.56    2.54
   1   4  17    2.50    2.74
   1  -4  17   -1.46    2.63
   1  -4  17    4.95    3.01
   1  -4  18    0.24    1.52
   1   4  18    4.89    2.87
   1  -4  18    3.94    2.61
   1   4  18    1.27    2.36
  -1  -4 -18    3.88    1.74
   1   4  18    4.89    2.65
   1  -4  18    0.96    2.31
   1  -4  18    6.74    2.81
   1   4  18    5.20    2.46
   1  -4  18    3.81    2.50
   1   4  18    6.34    2.76
   1  -4  19   -0.16    0.83
  -1   4 -19   -0.58    1.42
  -1  -4 -19   -0.33    2.12
   1   4  19   -0.71    2.29
   1  -4  19   -0.70    1.98
  -1   4 -19   -0.32    2.08
   1   4  19    1.39    2.01
   1  -4  19   -1.56    2.07
  -1  -4 -19    1.63    1.38
   1   4  19   -0.79    2.12
   1  -4  19   -1.89    1.91
   1  -4  19   -0.33    1.99
   1   4  19    0.78    1.97
   1   4  19    0.35    2.04
  -1   4 -20    1.52    1.03
   1  -4  20   -0.50    1.58
  -1   4 -20   -0.93    1.68
  -1  -4 -20    0.48    1.67
   1   4  20    1.74    1.60
   1  -4  20    0.84    1.36
   1   4  20    0.83    1.52
  -1  -4 -20    0.16    0.95
   1   4  20    4.37    1.81
   1   4  20    1.63    1.51
   1  -4  20    0.23    1.40
   1  -4  20    0.78    1.36
   1   4  20   -1.02    1.52
  -1   5  21   -0.34    0.96
  -1  -5  21    1.05    0.81
  -1  -5  20    5.42    1.62
   1  -5 -20    6.91    2.27
  -1  -5  20    3.37    1.70
  -1   5  20    4.41    1.73
   1   5 -20    2.75    1.99
  -1  -5  20    5.09    1.72
   1  -5 -20    4.77    1.19
  -1   5  20    5.61    1.79
  -1  -5  20    1.80    1.44
  -1   5  20    0.26    1.38
   1   5 -20   -0.49    1.40
   1  -5 -20   -1.30    1.57
  -1   5  20    2.80    1.70
  -1  -5  20    4.32    1.77
  -1  -5  19    3.39    1.90
  -1   5  19    2.43    1.09
  -1   5  19    5.05    2.16
  -1  -5  19    1.59    1.95
   1   5 -19    0.69    2.24
   1  -5 -19   -2.32    2.68
   1  -5 -19    1.34    1.76
   1  -5 -19    2.85    1.38
  -1   5  19    2.07    1.87
  -1  -5  19    2.09    1.88
  -1   5  19    1.78    1.78
  -1  -5  19    2.17    1.96
  -1   5  19    2.22    2.04
   1   5 -19   -1.00    1.90
   1  -5 -19   -0.36    1.91
  -1  -5  19    3.51    1.78
  -1  -5  18   90.93    7.05
  -1   5  18   79.43    5.94
   1  -5 -18   79.94    7.73
  -1  -5  18   65.72    6.81
  -1   5  18   77.33    7.28
   1   5 -18   69.23    7.26
   1  -5 -18   70.44    7.37
  -1   5  18   69.00    5.98
  -1   5  18   66.41    6.99
  -1  -5  18   72.43    7.10
   1  -5 -18   83.06    6.61
  -1   5  18   73.40    7.14
   1  -5 -18   20.77    5.84
  -1  -5  18   73.95    7.09
   1   5 -18    5.93    5.25
   1  -5 -17   45.69    6.15
   1   5 -17   31.81    5.54
  -1   5  17   43.63    5.65
   1  -5 -17   45.17    6.23
  -1  -5  17   36.40    5.24
   1  -5 -17   34.91    4.73
  -1   5  17   36.23    4.53
  -1  -5  17   31.66    5.11
  -1   5  17   42.69    5.55
  -1   5  17   38.09    4.37
   1  -5 -16    2.98    2.74
   1   5 -16    5.91    2.97
  -1   5  16   -0.44    2.23
  -1  -5  16   -0.44    2.34
   1  -5 -16    0.55    3.04
   1  -5 -16    4.14    2.24
  -1   5  16    0.99    1.35
  -1  -5  16    3.30    2.47
  -1   5  16    0.95    2.05
  -1   5  16    3.38    1.61
  -1  -5  16    1.97    1.54
  -1   5  15   11.71    4.15
   1   5 -15   12.35    3.86
  -1  -5  15    6.14    3.79
  -1   5  15    3.11    3.30
  -1  -5  15   11.61    4.12
   1  -5 -15    7.94    3.79
   1  -5 -15    8.54    3.40
  -1  -5  15    7.09    2.08
  -1   5  15   12.43    2.46
   1  -5 -15    7.78    3.53
   1   5 -15    9.37    3.25
  -1   5  15    7.51    3.01
  -1  -5  15    5.37    2.99
  -1  -5  15    5.71    2.76
   1  -5 -15    7.91    3.31
   1  -5 -15   11.72    2.78
  -1  -5  15   12.25    3.11
  -1   5  15    7.11    2.90
  -1   5  15   12.78    4.29
  -1  -5  15   11.75    4.27
  -1   5  14  200.66   20.67
  -1  -5  14  181.79   20.51
   1   5 -14  189.61   20.06
   1  -5 -14  209.29   20.91
  -1  -5  14  210.09   20.92
  -1   5  14  189.15   20.54
  -1  -5  14  230.71   18.04
  -1  -5  14  201.83   17.37
   1   5 -14  172.06   18.07
   1  -5 -14  194.84   18.71
  -1   5  14  205.00   18.17
  -1  -5  14  190.95   18.15
   1  -5 -14  222.13   19.25
  -1  -5  14  231.00   18.67
   1  -5 -14  204.02   17.91
  -1   5  14  235.39   18.69
   1  -5 -14  241.99   21.24
   1   5 -14  146.17   18.83
  -1  -5  14  187.39   20.11
  -1   5  13  193.45   19.89
   1  -5 -13  215.85   20.46
   1   5 -13  174.58   19.34
  -1  -5  13  179.35   19.70
  -1  -5  13  200.62   19.79
   1   5 -13  171.66   18.89
   1  -5 -13  226.23   20.20
  -1  -5  13  203.68   17.09
  -1  -5  13  198.96   17.30
  -1  -5  13  182.27   17.58
   1   5 -13  154.70   17.49
   1  -5 -13  189.73   18.19
  -1   5  13  200.32   17.76
   1  -5 -13  225.15   18.84
  -1   5  13  243.53   18.28
   1  -5 -13  213.02   17.67
  -1  -5  13  222.57   18.11
  -1   5  13  171.03   19.67
  -1  -5  13  208.44   20.46
   1   5 -12    5.70    3.21
   1  -5 -12   21.97    4.68
  -1  -5  12    5.51    3.19
  -1   5  12   16.61    4.37
  -1  -5  12   16.78    3.17
   1  -5 -12   13.11    3.68
   1   5 -12   12.24    3.57
  -1  -5  12   14.37    2.72
  -1   5  12   17.62    3.10
  -1  -5  12   11.32    2.65
  -1  -5  12   14.65    3.89
   1  -5 -12   15.58    3.60
  -1   5  12   13.63    2.97
   1  -5 -12    8.33    2.40
  -1  -5  12   12.44    2.92
  -1  -5  12    8.74    3.78
  -1   5  12    9.59    3.41
  -1  -5  11  293.34   24.81
   1  -5 -11  264.44   25.33
  -1   5  11  293.02   27.09
  -1  -5  11  308.65   27.32
   1  -5 -11  323.40   27.55
   1   5 -11  295.35   26.81
  -1   5  11  299.13   25.31
   1  -5 -11  339.95   25.42
  -1  -5  11  293.01   25.30
  -1  -5  11  293.55   26.85
   1   5 -11  260.08   26.30
   1   5 -11  332.48   28.54
   1  -5 -11  348.76   27.27
  -1  -5  11  285.05   25.56
  -1   5  10   10.70    3.18
   1   5 -10   11.91    3.22
   1  -5 -10   13.68    3.40
  -1  -5  10   14.05    2.38
   1  -5 -10    9.96    2.34
  -1   5  10   10.32    2.42
  -1  -5  10   10.03    2.71
   1   5 -10   12.06    4.01
   1  -5 -10    9.47    2.74
   1   5 -10   10.39    3.04
  -1  -5  10    5.84    2.87
   1  -5  -9   26.41    3.38
   1   5  -9   20.45    3.19
   1   5  -9   21.13    4.10
  -1  -5   9   22.78    3.76
   1  -5  -9   29.01    4.27
   1   5  -9   14.23    3.94
   1  -5  -9   14.82    3.86
   1   5  -9   15.49    3.72
  -1  -5   8  111.37   10.82
   1   5  -8  111.92   11.34
   1  -5  -8  123.51   11.17
   1  -5  -8  114.79   11.44
   1   5  -8  101.96   10.90
  -1  -5   7    2.84    1.99
   1  -5  -7    5.69    1.97
   1   5  -7    7.61    2.56
   1  -5  -7    7.48    2.44
   1   5  -7    5.35    2.22
   1  -5  -6  986.00   75.89
  -1  -5   6  924.58   76.03
   1   5  -6  974.22   76.54
   1  -5  -6  925.69   74.29
   1  -5  -6 1091.51   76.31
   1   5  -6 1027.40   76.11
   1   5  -5   41.55    5.22
  -1  -5   5   35.66    4.64
   1  -5  -5   44.72    4.53
   1  -5  -5   41.26    4.61
   1   5  -5   31.16    4.39
   1  -5  -4   66.76    6.09
   1   5  -4   61.26    6.42
   1  -5  -4   57.02    6.22
   1  -5  -4   65.76    6.24
   1   5  -4   61.24    6.30
   1  -5  -3   14.79    2.12
   1   5  -3   14.82    3.10
   1  -5  -3   15.05    3.00
   1  -5  -3   15.87    2.54
   1  -5  -3   16.52    2.43
   1   5  -3   14.80    2.64
   1   5  -3   14.16    2.49
  -1   5   2  100.36    7.65
   1   5  -2   86.27    8.73
   1  -5  -2   79.67    7.25
  -1  -5   2   90.96    7.91
   1   5  -2   74.24    7.52
   1   5  -2   76.98    7.78
   1  -5  -2   79.92    7.67
   1  -5  -2   98.05    7.65
   1  -5  -2   73.85    7.43
   1   5  -2   82.60    7.53
   1   5  -1 2130.03  149.42
  -1   5   1 1875.87  147.94
  -1  -5   1 2150.99  148.42
   1   5  -1 1949.06  147.98
   1   5  -1 1752.07  148.00
   1  -5  -1 1730.05  147.87
   1  -5  -1 1886.32  147.92
   1  -5  -1 1899.57  148.02
   1  -5   0 1575.63  130.99
  -1   5   0 1710.77  130.99
  -1  -5   0 1775.32  131.20
   1   5   0 1808.19  132.23
   1   5   0 1773.63  131.03
   1  -5   0 1613.70  130.94
   1  -5   0 1597.52  130.70
   1  -5   0 1664.62  130.80
   1   5   0 1756.57  131.07
   1  -5   0 1736.38  131.05
   1   5   0 1562.72  130.76
   1   5   0 1652.88  130.73
   1  -5   1 3374.83  272.20
  -1  -5  -1 3662.40  272.10
  -1   5  -1 3603.98  272.14
   1  -5   1 3691.12  272.31
   1  -5   1 3483.92  271.73
   1   5   1 3416.59  271.66
   1  -5   1 3228.26  272.03
   1   5   1 3459.33  271.69
   1   5   1 3647.85  272.11
   1  -5   1 3430.92  272.12
   1   5   1 3403.92  272.02
   1  -5   2  543.99   42.51
   1  -5   2  580.26   42.90
  -1  -5  -2  570.52   42.33
  -1   5  -2  531.34   42.51
   1   5   2  561.20   42.60
   1  -5   2  452.96   42.42
   1   5   2  503.99   42.44
   1   5   2  551.57   42.56
   1  -5   2  469.10   42.43
   1  -5   2  556.63   42.68
   1  -5   3  391.60   29.31
  -1  -5  -3  356.67   28.24
   1  -5   3  363.43   28.55
  -1   5  -3  359.18   28.71
   1   5   3  351.43   28.73
   1  -5   3  346.18   28.82
   1   5   3  331.01   28.59
   1  -5   3  349.04   28.82
   1   5   3  330.09   28.62
   1  -5   3  330.40   28.70
   1  -5   4  398.77   29.90
  -1   5  -4  354.27   29.04
   1  -5   4  370.93   28.77
  -1  -5  -4  328.54   28.34
   1   5   4  344.86   29.05
   1  -5   4  337.73   29.17
   1   5   4  357.83   29.02
   1  -5   4  330.37   29.06
   1  -5   4  379.01   29.37
   1  -5   4  362.07   29.24
   1   5   4  350.53   29.18
   1   5   4  337.23   29.02
  -1   5  -5  871.15   64.46
   1  -5   5  809.56   63.81
  -1   5  -5  844.04   64.66
   1   5   5  808.58   64.42
   1  -5   5  764.94   64.58
   1  -5   5  799.14   64.64
   1   5   5  847.06   64.54
   1   5   5  790.96   64.38
   1  -5   5  792.58   64.65
   1  -5   5  743.89   64.42
   1   5   5  749.15   64.27
   1  -5   6    1.52    1.54
  -1   5  -6    1.13    1.71
  -1   5  -6    1.35    1.85
  -1  -5  -6    2.02    1.87
   1   5   6    2.06    1.86
   1  -5   6    4.69    2.38
   1   5   6    0.82    2.16
   1  -5   6    2.32    2.19
   1  -5   6    2.88    2.30
   1   5   6    7.19    2.58
   1   5   6    3.65    2.17
   1  -5   6    2.76    2.45
  -1  -5  -7  712.85   57.27
  -1   5  -7  729.59   57.72
   1  -5   7  788.31   58.42
  -1   5  -7  714.31   57.14
   1  -5   7  679.04   56.05
   1   5   7  662.02   57.23
   1  -5   7  665.16   57.56
   1   5   7  629.71   57.08
   1   5   7  701.15   57.44
   1  -5   7  750.67   57.97
   1  -5   7  707.57   57.85
   1   5   7  702.31   57.40
   1  -5   7  747.93   57.97
   1  -5   8   16.86    4.25
  -1  -5  -8   23.65    4.12
   1  -5   8   18.30    2.90
  -1   5  -8   17.68    4.14
  -1   5  -8   21.03    3.81
   1  -5   8   15.67    4.18
   1   5   8   19.52    3.85
   1  -5   8    9.66    3.66
   1   5   8   17.76    3.92
   1  -5   8   20.70    4.53
   1   5   8   19.56    4.11
   1   5   8   18.91    4.14
   1  -5   8   21.27    4.47
  -1   5  -9  199.47   19.80
  -1  -5  -9  250.20   19.92
   1  -5   9  211.60   20.31
   1  -5   9  189.52   18.19
   1   5   9  196.77   18.03
   1   5   9  210.84   19.96
   1  -5   9  221.19   20.43
   1   5   9  188.54   19.52
   1  -5   9  224.93   20.49
   1   5   9  211.57   19.98
   1   5   9  200.18   19.74
   1  -5   9  220.37   20.44
   1  -5   9  229.98   20.71
   1   5  10  259.85   23.28
   1  -5  10  276.09   23.81
   1  -5  10  263.16   23.57
   1   5  10  238.62   23.07
   1   5  10  233.25   22.84
   1  -5  10  276.91   23.95
   1  -5  10  237.32   23.24
   1   5  10  242.67   23.01
   1  -5  10  216.89   20.24
   1   5  10  264.67   21.13
   1   5  10  227.01   19.85
   1  -5  10  222.05   21.02
  -1   5 -10  221.68   22.60
  -1  -5 -10  281.11   22.83
   1  -5  10  271.35   23.73
   1   5  11  105.06   12.35
   1  -5  11   85.55   10.19
   1   5  11   98.17   10.06
   1   5  11  122.04   10.81
   1  -5  11   98.87   10.30
   1  -5  11   98.96   12.45
   1   5  11   96.69   12.06
   1  -5  11   89.73   12.19
   1   5  11   91.91   12.11
   1  -5  11  105.90   12.71
   1   5  11  109.57   12.49
   1  -5  11   96.02   12.26
   1  -5  11   96.03    9.55
   1  -5  11   94.80   10.17
   1   5  11   99.29   10.08
   1   5  11   86.28    9.94
   1  -5  11  110.98   10.59
   1  -5  11  126.36   13.10
  -1   5 -11  104.07   12.11
  -1  -5 -11  114.39   11.87
  -1   5 -11  110.28   11.65
   1   5  12  379.45   32.68
   1  -5  12  386.44   32.75
   1   5  12  426.05   33.28
   1  -5  12  390.24   33.05
   1   5  12  360.71   35.22
   1  -5  12  336.65   35.01
   1  -5  12  400.44   35.86
   1   5  12  395.38   35.62
   1   5  12  435.90   36.28
   1  -5  12  370.99   35.31
   1  -5  12  382.82   35.66
   1   5  12  384.32   35.41
   1  -5  12  391.93   31.95
   1  -5  12  362.15   32.61
   1   5  12  371.73   32.60
   1  -5  12  397.28   33.02
   1   5  12  383.21   32.85
  -1   5 -12  373.27   34.96
  -1  -5 -12  410.31   34.66
  -1  -5 -12  410.73   33.31
   1  -5  12  386.82   35.48
  -1   5 -12  355.12   33.92
   1   5  13  521.59   38.04
   1  -5  13  475.56   40.77
   1   5  13  447.45   40.37
   1  -5  13  436.63   37.15
   1  -5  13  432.95   37.45
   1   5  13  443.20   37.16
   1  -5  13  417.65   36.18
  -1  -5 -13  453.09   39.23
  -1  -5 -13  488.01   37.69
  -1   5 -13  367.32   38.83
   1  -5  13  404.67   39.64
  -1   5 -13  419.58   38.55
   1   5  13  447.39   37.16
   1  -5  13  458.62   37.27
   1   5  13  443.17   37.37
   1  -5  13  436.51   37.35
   1   5  13  439.09   40.27
   1  -5  13  417.46   40.12
   1  -5  13  396.91   39.92
   1   5  13  425.57   40.30
   1   5  13  449.28   40.31
   1  -5  13  443.34   40.25
   1  -5  14   32.71    7.09
   1   5  14   34.10    7.43
   1   5  14   38.53    7.66
   1  -5  14   32.01    7.23
   1   5  14   43.66    7.90
   1  -5  14   34.85    7.35
  -1   5 -14   30.43    6.07
  -1   5 -14   29.32    6.47
  -1  -5 -14   29.60    6.27
   1  -5  14   30.30    4.62
   1   5  14   40.74    5.91
   1  -5  14   17.34    5.79
   1  -5  14   31.94    5.42
   1  -5  14   39.93    5.85
   1   5  14   47.28    6.30
   1   5  14   41.37    7.94
   1  -5  14   33.62    5.50
   1   5  14   40.63    5.92
   1   5  14   47.62    6.45
   1  -5  14   37.53    7.65
   1  -5  14   47.58    6.43
   1  -5  15   19.40    5.62
   1   5  15   21.08    5.86
  -1   5 -15   22.05    4.97
  -1  -5 -15   15.52    4.86
   1  -5  15   20.59    3.61
   1   5  15   28.45    4.79
   1  -5  15   31.23    4.96
  -1  -5 -15   19.05    3.91
   1   5  15   26.90    4.90
   1  -5  15   17.63    4.43
   1  -5  15   23.94    4.78
   1   5  15   31.61    6.68
   1  -5  15   19.56    4.49
   1  -5  15   17.95    5.54
   1   5  15   20.79    4.55
   1   5  15   22.24    4.50
   1  -5  16    4.38    2.09
   1  -5  16    5.22    3.07
   1   5  16    6.37    2.88
   1  -5  16    4.57    2.85
   1   5  16    1.16    2.69
   1   5  16    1.18    2.61
   1  -5  16    3.45    3.02
   1  -5  16    1.53    2.54
   1   5  16    3.14    2.84
   1  -5  17   32.47    4.37
   1  -5  17   32.06    5.26
   1   5  17   28.10    5.07
   1   5  17   26.25    5.01
   1  -5  17   32.59    5.26
  -1  -5 -17   38.91    4.67
   1   5  17   26.06    5.07
   1  -5  17   31.99    5.19
   1  -5  17   38.77    5.67
   1   5  17   35.70    5.26
   1   5  17   37.47    5.54
   1  -5  18   54.41    6.09
  -1   5 -18   89.89    7.35
  -1  -5 -18   54.91    6.82
   1  -5  18   65.39    7.14
   1   5  18   68.43    7.24
  -1   5 -18   34.62    6.29
   1   5  18   66.36    7.11
   1  -5  18   53.24    6.88
  -1  -5 -18   70.86    6.55
   1   5  18   53.66    6.93
   1  -5  18   61.25    7.00
   1   5  18   60.78    7.01
   1  -5  18   62.98    7.21
   1   5  18   66.89    7.41
  -1   5 -19   15.51    2.58
   1  -5  19    7.10    1.70
  -1  -5 -19   12.48    2.89
   1   5  19   13.86    2.75
   1  -5  19   13.97    2.90
  -1   5 -19    4.76    2.30
   1   5  19    9.66    2.63
   1  -5  19   10.27    2.64
   1   5  19   10.81    2.67
  -1  -5 -19   11.06    2.17
   1  -5  19    7.17    2.30
   1  -5  19    6.75    2.30
   1   5  19    9.87    2.73
   1   5  19   12.43    2.76
  -1   5 -20   -0.84    0.92
   1   5  20   -0.20    1.24
  -1   5 -20   -0.74    1.32
   1  -5  20   -2.02    1.34
  -1  -5 -20    0.20    1.45
   1   5  20   -1.20    1.45
  -1  -5 -20   -1.12    0.93
   1   5  20   -1.16    1.34
  -1   5 -20    0.38    1.09
   1  -5  20    0.54    1.24
  -1   6  20   -0.41    0.96
  -1  -6  20    0.56    1.28
   1  -6 -20    0.21    1.36
  -1   6  20   -0.35    0.94
  -1  -6  20    1.57    1.34
   1   6 -20   -1.11    1.45
   1  -6 -20   -0.16    0.99
  -1   6  20   -1.28    1.32
  -1  -6  20    0.18    1.11
  -1  -6  19   20.76    2.81
  -1   6  19   12.50    2.41
  -1  -6  19   24.37    3.15
   1  -6 -19   19.04    3.28
   1   6 -19   15.97    2.96
   1  -6 -19   19.86    3.07
  -1  -6  19   16.97    2.75
   1  -6 -19   19.13    2.42
  -1   6  19   15.22    2.52
   1   6 -19    2.34    1.75
   1  -6 -19    4.40    1.99
  -1   6  19   10.32    2.35
  -1   6  19    3.14    1.70
  -1  -6  19   18.67    2.93
  -1  -6  19    4.42    1.91
  -1   6  18    2.81    1.29
   1   6 -18   -0.39    2.38
  -1   6  18    1.39    1.95
  -1  -6  18   -0.36    1.99
   1  -6 -18   -1.30    2.90
   1  -6 -18   -0.92    2.37
  -1  -6  18    0.39    1.87
  -1   6  18    0.76    1.74
  -1   6  18    0.43    1.03
   1  -6 -18   -0.91    1.69
  -1   6  18   -2.44    2.29
  -1  -6  18    1.19    1.98
   1   6 -18    1.83    2.15
   1  -6 -18   -0.40    1.98
  -1  -6  18   -1.40    2.21
  -1   6  18   -0.39    2.06
  -1  -6  17   40.46    4.20
  -1   6  17   45.28    4.38
   1   6 -17   41.35    5.58
  -1   6  17   49.39    5.46
   1  -6 -17   44.57    6.00
  -1  -6  17   50.90    5.71
   1  -6 -17   50.27    6.41
  -1  -6  17   55.16    5.85
   1  -6 -17   53.70    5.31
  -1   6  17   40.14    4.50
  -1   6  17   41.61    5.35
  -1  -6  17   47.43    5.56
  -1   6  17   45.51    5.41
   1  -6 -17   17.19    4.60
   1   6 -17    4.59    3.86
   1  -6 -16  107.54   11.51
  -1   6  16  108.43   10.73
  -1  -6  16  114.08   10.91
   1  -6 -16   89.97   10.89
   1   6 -16  106.75   11.05
  -1  -6  16  118.54   11.12
  -1   6  16  100.16   10.07
  -1   6  16  131.03   11.27
   1  -6 -16  103.68   10.41
  -1   6  16  104.52    9.81
  -1  -6  16  105.24    9.82
  -1   6  15   69.07   10.16
  -1  -6  15   92.51   11.35
   1   6 -15   37.66    8.83
  -1  -6  15   58.66   10.09
  -1  -6  15   87.72   11.00
   1  -6 -15   41.19    9.00
   1   6 -15   67.51    9.76
  -1   6  15   75.32   10.35
   1  -6 -15   57.90    9.68
  -1  -6  15   43.68    9.18
  -1   6  15   43.53    9.06
  -1   6  15   47.13    9.16
  -1  -6  15   96.68    8.58
   1   6 -15   86.45    8.89
  -1  -6  15   78.58    7.59
  -1   6  15   91.00    7.81
   1   6 -15   65.36    8.43
   1  -6 -15   83.26    9.23
  -1   6  15   94.81    8.77
  -1  -6  15   84.53    8.56
   1  -6 -15   96.52    9.71
   1  -6 -15   96.91    8.51
  -1   6  15   88.68    8.06
  -1   6  15   79.76    8.58
  -1  -6  15   87.93    8.70
   1  -6 -15   88.07   10.77
  -1  -6  15   68.33   10.06
  -1  -6  14    6.49    3.40
  -1  -6  14    4.90    3.71
  -1   6  14    3.67    3.01
   1   6 -14    3.38    2.89
  -1   6  14   -0.98    3.22
   1  -6 -14    2.86    3.00
   1  -6 -14    6.16    2.89
   1   6 -14    9.91    3.41
  -1  -6  14    3.95    2.02
  -1  -6  14    7.10    2.61
  -1   6  14    7.94    2.81
  -1  -6  14    2.12    2.29
  -1  -6  14    8.10    3.51
   1  -6 -14    5.35    3.00
   1   6 -14    4.28    2.71
   1  -6 -14    5.40    2.67
  -1   6  14    7.60    2.48
   1  -6 -14    6.16    2.32
  -1  -6  14    4.99    2.48
  -1  -6  14    6.57    4.06
  -1   6  14    9.28    3.72
   1  -6 -13    8.11    3.96
   1   6 -13    3.95    2.99
  -1   6  13    5.15    3.32
  -1  -6  13    9.53    3.64
   1  -6 -13   20.98    4.49
   1   6 -13    6.42    3.21
  -1  -6  13    9.03    2.73
  -1  -6  13    7.89    2.22
  -1  -6  13    9.19    2.72
  -1  -6  13    9.34    3.48
  -1   6  13   11.45    2.72
   1  -6 -13    9.72    3.39
   1   6 -13   16.20    3.68
   1  -6 -13   12.97    3.57
  -1  -6  13   14.06    3.10
   1  -6 -13   16.89    3.13
  -1   6  13   11.37    2.83
  -1  -6  13    9.66    3.77
  -1   6  13   13.91    4.24
  -1   6  12    2.35    2.39
  -1  -6  12    6.35    3.20
   1   6 -12    3.61    2.93
   1  -6 -12   10.00    3.62
  -1  -6  12    5.54    2.31
   1  -6 -12   10.91    3.25
   1   6 -12    2.28    2.53
  -1  -6  12    9.08    2.19
  -1  -6  12    8.96    2.33
  -1  -6  12    9.36    3.40
   1   6 -12    5.82    2.64
  -1  -6  12    6.99    2.59
   1  -6 -12    8.11    3.05
  -1   6  12    8.37    2.61
   1  -6 -12    3.61    2.43
  -1   6  12   11.99    2.69
   1  -6 -12    6.56    2.29
  -1  -6  12    6.27    2.41
  -1  -6  12    4.81    3.15
  -1   6  12    6.36    3.03
  -1  -6  11    4.32    2.64
  -1   6  11    4.28    2.69
  -1   6  11    7.74    2.97
  -1  -6  11    3.57    2.53
   1   6 -11   -0.65    2.30
   1  -6 -11    3.02    2.76
  -1  -6  11    1.16    1.59
   1  -6 -11    6.42    2.43
  -1  -6  11    3.67    1.92
   1  -6 -11    6.55    2.82
  -1   6  11    6.92    2.18
   1   6 -11    1.13    2.28
   1  -6 -11    2.90    1.82
  -1  -6  11    2.13    1.72
  -1   6  11    4.88    1.84
  -1  -6  11    4.95    2.91
   1  -6 -11    3.87    2.12
   1   6 -11    9.94    3.35
  -1  -6  11    8.29    2.57
   1  -6 -10   70.85    7.78
  -1  -6  10   66.49    6.87
   1  -6 -10   83.75    8.64
  -1  -6  10   65.35    8.48
   1   6 -10   72.25    8.74
  -1  -6  10   80.09    8.16
  -1  -6  10   61.01    8.40
   1  -6 -10   79.35    9.09
   1   6 -10   57.03    8.07
  -1   6  10   74.75    8.76
  -1  -6  10   61.87    7.09
  -1   6  10   63.27    7.13
   1   6 -10   76.77    7.39
   1   6  -9  224.77   22.31
   1  -6  -9  259.20   22.06
  -1  -6   9  233.11   21.45
   1   6  -9  269.74   21.09
  -1   6   9  249.80   22.26
   1  -6  -9  253.14   22.45
   1   6  -9  225.93   21.76
   1   6  -8  474.68   42.58
   1  -6  -8  532.05   43.02
   1  -6  -8  543.96   42.69
   1   6  -8  500.98   43.21
  -1  -6   8  530.98   42.48
   1   6  -8  511.62   41.71
   1   6  -7   30.50    4.51
   1  -6  -7   40.32    4.97
  -1  -6   7   29.21    4.45
   1  -6  -7   33.82    4.52
   1   6  -7   40.87    5.46
   1  -6  -6   70.32    7.45
   1   6  -6   66.55    7.32
   1  -6  -6   76.96    7.41
   1   6  -6   80.46    8.45
  -1  -6   6   67.35    7.51
   1   6  -5   24.01    3.52
   1  -6  -5   24.73    3.66
   1   6  -5   18.28    3.48
   1  -6  -5   26.33    3.58
  -1  -6   5   19.81    3.71
   1  -6  -5   29.05    3.41
   1  -6  -4  164.05   14.29
   1  -6  -4  154.84   14.29
   1   6  -4  181.38   14.47
   1   6  -4  144.41   14.35
   1  -6  -4  183.44   14.32
   1  -6  -3  608.21   50.26
   1  -6  -3  604.29   50.07
   1   6  -3  775.04   50.35
   1   6  -3  550.04   50.26
   1  -6  -3  670.30   50.17
   1   6  -3  529.30   50.01
   1  -6  -3  639.05   49.99
  -1  -6   3  683.93   50.57
   1  -6  -2   35.99    4.64
   1   6  -2   42.78    4.88
   1  -6  -2   41.89    4.53
   1  -6  -2   40.67    4.51
   1   6  -2   63.18    4.85
   1   6  -2   49.52    4.75
   1   6  -2   60.70    6.38
  -1   6   2   46.58    4.93
  -1  -6   2   51.45    5.25
   1  -6  -1  157.80   13.49
   1   6  -1  162.34   13.50
   1  -6  -1  163.02   13.44
   1   6  -1  159.40   13.60
  -1  -6   1  178.75   14.20
  -1   6   1  174.05   14.02
   1  -6  -1  147.15   13.64
   1   6  -1  201.68   15.58
   1   6   0  291.13   24.35
   1   6   0  303.96   24.43
   1  -6   0  313.87   24.39
   1  -6   0  283.81   24.31
   1   6   0  355.79   26.59
  -1   6   0  331.87   25.12
   1  -6   0  296.20   24.90
  -1  -6   0  353.27   25.35
   1  -6   1  895.15   76.72
   1   6   1  987.20   76.76
   1   6   1  964.13   76.77
   1  -6   1  950.28   76.81
   1  -6   1  936.10   77.11
   1  -6   1 1056.21   77.45
  -1   6  -1  998.67   77.16
  -1  -6  -1 1062.18   77.19
   1   6   2  623.66   50.47
   1   6   2  644.65   50.52
   1  -6   2  626.43   50.60
   1  -6   2  597.82   50.51
  -1   6  -2  618.71   50.72
   1  -6   2  669.90   51.06
   1  -6   2  639.28   50.80
  -1  -6  -2  652.02   50.55
   1   6   3  446.15   36.13
   1  -6   3  434.39   36.15
   1   6   3  422.20   36.02
   1  -6   3  405.44   36.10
   1  -6   3  402.04   36.09
   1   6   3  451.99   36.16
   1  -6   3  453.22   36.22
  -1   6  -3  471.56   36.36
   1  -6   3  480.25   36.81
  -1  -6  -3  489.76   35.97
   1  -6   4  149.19   14.10
   1   6   4  166.44   14.12
   1  -6   4  155.44   14.23
   1  -6   4  140.31   14.12
   1   6   4  151.84   14.04
  -1   6  -4  178.47   14.45
   1  -6   4  184.35   15.11
  -1  -6  -4  153.78   13.64
   1  -6   4  157.96   13.99
   1   6   4  168.97   14.27
   1  -6   4  159.09   14.28
   1  -6   5   13.62    3.34
   1  -6   5   11.22    2.49
  -1   6  -5   12.55    2.73
   1  -6   5   14.51    2.99
   1   6   5   14.26    2.75
   1   6   5   10.54    2.61
   1   6   5    9.57    2.42
   1  -6   5    8.74    2.54
   1   6   5    8.09    2.27
   1  -6   5    9.73    2.64
   1  -6   5    4.24    2.22
  -1   6  -6   61.88    6.94
   1  -6   6   66.98    6.62
  -1  -6  -6   66.11    7.30
   1   6   6   60.15    6.89
   1  -6   6   64.26    7.33
   1  -6   6   49.67    6.90
   1  -6   6   46.86    6.83
   1   6   6   54.09    6.72
   1   6   6   60.21    6.88
   1   6   6   63.80    6.99
   1  -6   6   55.66    7.01
   1  -6   7  560.71   48.33
  -1  -6  -7  687.54   49.92
  -1   6  -7  618.85   49.39
   1  -6   7  581.98   49.77
   1   6   7  556.62   49.19
   1  -6   7  588.89   49.83
   1   6   7  611.97   49.43
   1   6   7  555.80   49.26
   1  -6   7  626.10   50.00
   1  -6   7  642.77   50.03
   1   6   7  607.24   49.47
  -1   6  -8  116.28   12.23
  -1  -6  -8  153.37   12.80
   1  -6   8  134.12   13.31
  -1   6  -8  120.19   11.97
   1  -6   8  102.66   10.73
   1   6   8  118.34   12.11
   1  -6   8  108.27   12.39
   1  -6   8  117.13   12.62
   1   6   8  113.17   12.04
   1  -6   8  108.52   12.32
   1   6   8  136.12   12.54
   1  -6   8  117.63   12.65
   1   6   8   99.13   11.66
  -1   6  -9  361.39   33.54
  -1  -6  -9  453.27   34.10
   1  -6   9  406.67   34.68
   1   6   9  369.77   33.52
   1  -6   9  380.53   34.43
   1   6   9  410.24   33.97
   1  -6   9  406.76   34.36
   1   6   9  392.88   33.70
   1  -6   9  401.27   34.33
   1  -6   9  385.87   32.17
   1   6   9  373.44   31.84
   1   6   9  370.66   31.08
   1  -6   9  330.61   32.00
   1   6   9  384.95   33.67
   1   6   9  410.45   32.10
   1  -6   9  421.55   34.56
  -1   6 -10    1.51    2.24
  -1  -6 -10    3.49    2.86
   1  -6  10    2.87    1.77
   1  -6  10    5.09    3.38
   1  -6  10   -0.86    2.91
   1   6  10   -0.77    2.52
   1   6  10    1.53    2.60
   1  -6  10    4.41    3.21
   1   6  10   -0.80    2.36
   1   6  10   -0.36    1.95
   1  -6  10    0.89    2.90
   1  -6  10   -1.22    1.91
   1  -6  10    0.87    1.63
   1   6  10    3.90    1.94
   1   6  10    1.11    0.96
   1   6  10    3.87    2.91
   1   6  10    2.85    1.92
   1   6  10    0.36    1.64
   1  -6  10   -0.45    1.86
   1  -6  10   -0.40    1.97
   1  -6  10    2.61    2.94
   1  -6  11  171.63   16.63
   1  -6  11  200.59   19.64
   1   6  11  203.66   17.04
   1   6  11  224.01   19.72
   1  -6  11  186.28   17.09
   1   6  11  174.74   16.50
   1  -6  11  183.41   16.26
   1  -6  11  171.52   15.82
   1  -6  11  180.84   16.77
   1   6  11  176.05   16.50
   1  -6  11  204.18   19.69
  -1   6 -11  196.81   18.46
  -1   6 -11  167.75   18.34
  -1  -6 -11  217.37   19.04
   1  -6  11  184.86   16.99
   1   6  11  189.69   15.66
   1   6  11  156.19   16.41
   1  -6  11  187.24   19.36
   1   6  11  155.67   18.27
   1  -6  11  204.71   19.85
   1   6  11  205.67   19.43
   1  -6  11  185.66   19.20
   1   6  11  179.13   18.75
   1   6  12  213.75   17.08
   1  -6  12  185.85   16.74
   1  -6  12  186.55   19.31
   1   6  12  185.86   16.33
   1  -6  12  186.18   16.51
   1   6  12  168.41   18.53
   1  -6  12  177.48   15.76
   1  -6  12  149.67   18.49
   1  -6  12  131.08   17.97
   1  -6  12  157.93   18.60
   1   6  12  164.75   18.52
   1   6  12  159.57   18.32
   1   6  12  172.19   18.77
   1  -6  12  172.85   16.32
   1   6  12  180.97   16.26
   1  -6  12  175.33   16.50
   1   6  12  171.37   16.35
  -1  -6 -12  188.04   16.83
   1  -6  12  158.55   18.49
  -1  -6 -12  190.42   18.41
  -1   6 -12  157.50   17.56
  -1   6 -13   -0.84    2.24
  -1  -6 -13    0.90    2.24
   1  -6  13    3.02    2.13
   1  -6  13    1.02    2.39
   1  -6  13    4.30    3.50
   1   6  13    1.97    2.27
   1  -6  13   -1.11    3.14
   1  -6  13    1.70    2.38
   1   6  13    2.17    3.05
   1  -6  13    0.50    2.40
   1   6  13    4.45    2.75
   1   6  13    0.56    2.22
   1  -6  13    0.55    2.37
   1   6  13    1.07    2.20
   1  -6  13    2.14    2.85
   1  -6  13    3.31    3.59
   1   6  13   -2.21    3.45
   1  -6  13    1.12    2.99
   1   6  13    1.08    2.86
   1   6  13    1.06    2.98
   1   6  14  120.62   11.85
   1  -6  14  121.34   12.33
   1   6  14  121.82   14.88
   1  -6  14  103.22   14.28
   1   6  14  133.51   12.38
   1  -6  14  112.31   11.81
   1   6  14  117.68   14.79
   1  -6  14   99.53   13.88
   1  -6  14  103.74   14.20
   1   6  14  106.79   14.09
   1  -6  14  106.68   14.43
   1   6  14   85.27   13.48
   1  -6  14  115.96   11.14
   1   6  14  121.11   11.88
   1  -6  14  128.09   12.11
   1  -6  14  129.84   12.33
   1   6  14  104.95   11.71
  -1   6 -14  118.52   13.43
   1  -6  14   92.81   13.76
  -1  -6 -14  115.84   13.78
   1  -6  15   12.36    3.13
   1  -6  15   17.30    3.85
   1   6  15   19.39    4.04
  -1  -6 -15   10.05    3.19
   1  -6  15   11.39    3.77
   1   6  15   10.32    3.75
   1   6  15   15.58    3.97
   1   6  15   14.04    3.98
   1  -6  15   21.48    4.17
   1  -6  15    5.21    3.24
  -1   6 -16   26.21    4.05
   1  -6  16   25.87    3.88
   1  -6  16   20.02    4.20
   1   6  16   21.00    4.28
  -1  -6 -16   16.64    3.61
   1   6  16   20.27    4.24
   1  -6  16   27.99    4.69
   1  -6  16   17.54    4.21
   1  -6  16   21.82    4.29
   1   6  16   16.28    4.05
   1   6  16   18.29    4.16
   1  -6  17   13.99    2.84
  -1   6 -17   15.06    3.11
   1   6  17   13.35    3.38
   1  -6  17   11.25    3.33
   1  -6  17   11.40    3.30
   1   6  17   12.71    3.32
   1  -6  17   13.69    3.54
   1  -6  17   14.70    3.39
   1   6  17   14.46    3.58
   1   6  17   14.75    3.52
  -1   6 -18   35.67    4.31
   1  -6  18   27.16    3.60
  -1  -6 -18   26.42    4.33
   1   6  18   35.70    4.62
   1  -6  18   32.42    4.67
  -1   6 -18   16.08    3.82
   1   6  18   28.42    4.42
   1  -6  18   23.15    4.15
   1   6  18   30.98    4.52
  -1  -6 -18   30.70    3.93
   1   6  18   32.52    4.40
   1  -6  18   30.44    4.41
   1  -6  18   26.02    4.39
   1   6  18   27.61    4.39
   1   6  19    2.14    1.48
   1  -6  19    4.93    1.39
  -1   6 -19    6.20    1.74
   1   6  19    5.27    2.18
   1  -6  19    7.30    2.15
  -1  -6 -19    5.59    2.15
  -1   6 -19    0.71    1.66
   1   6  19    3.61    1.73
   1  -6  19    3.65    1.83
  -1  -6 -19    4.50    1.57
   1   6  19    8.90    2.16
   1   6  19    6.10    1.97
   1  -6  19    3.98    1.79
   1   6  19    1.70    1.54
   1  -6  19    3.10    1.73
  -1  -6 -20    9.20    1.60
   1   6  20    7.85    1.68
  -1   7  20    1.53    1.27
  -1  -7  20    2.80    1.35
  -1  -7  19    1.97    1.65
  -1   7  19    0.67    0.87
   1   7 -19    1.40    1.70
   1  -7 -19    1.05    1.26
   1  -7 -19    1.30    1.70
   1  -7 -19    1.88    1.29
  -1  -7  19   -0.27    0.89
  -1  -7  19    0.26    0.54
   1   7 -19   -0.24    0.99
  -1   7  19    2.05    1.41
  -1   7  18   15.09    1.85
  -1  -7  18    9.21    2.75
  -1   7  18    9.54    2.52
   1   7 -18   11.77    3.03
   1  -7 -18   15.97    3.35
   1  -7 -18   15.67    3.35
   1  -7 -18   15.57    2.72
  -1  -7  18   15.16    2.99
  -1   7  18    8.83    1.70
  -1   7  18   10.44    2.55
  -1  -7  18    9.53    2.75
  -1   7  18    6.81    2.52
   1   7 -18    0.65    1.94
  -1  -7  18    2.16    2.02
  -1   7  18    0.70    1.96
   1  -7 -18    5.79    2.26
  -1   7  17   16.28    2.29
  -1  -7  17   11.40    2.15
  -1  -7  17   21.52    3.55
   1  -7 -17   17.78    3.97
  -1   7  17   12.68    2.88
   1   7 -17   12.24    3.33
   1  -7 -17   11.27    3.60
  -1   7  17   18.53    3.33
  -1  -7  17   10.86    2.94
   1  -7 -17   19.41    3.22
  -1   7  17   18.76    2.69
  -1  -7  17   14.37    3.34
  -1  -7  17    3.43    2.48
  -1   7  17    4.54    2.46
   1   7 -17    0.77    2.29
  -1   7  17   13.18    3.03
   1  -7 -17    6.49    2.70
  -1  -7  16   26.00    3.43
  -1  -7  16   25.54    4.27
   1   7 -16   20.74    3.99
  -1   7  16   30.35    3.42
  -1  -7  16   19.60    3.90
   1   7 -16   28.51    4.61
  -1   7  16   30.41    4.23
   1  -7 -16   21.11    4.33
   1  -7 -16   37.44    5.48
  -1  -7  16   35.96    4.68
  -1   7  16   25.27    3.63
   1  -7 -16   30.18    4.22
  -1   7  16   27.33    4.17
  -1  -7  16   29.40    4.56
   1  -7 -16   12.03    3.70
   1   7 -16    2.55    3.14
  -1   7  16   21.68    4.04
   1  -7 -15   30.20    5.34
  -1  -7  15   23.09    4.40
   1   7 -15   24.03    4.82
   1  -7 -15   27.25    5.20
  -1   7  15   34.67    4.73
  -1  -7  15   30.36    4.75
  -1   7  15   27.22    4.49
  -1   7  15   33.40    4.39
   1  -7 -15   34.77    4.67
   1   7 -15   34.70    5.23
  -1  -7  15   25.97    3.88
  -1  -7  15   36.48    4.94
   1   7 -14   -0.84    2.08
   1  -7 -14    1.87    2.48
   1   7 -14    2.71    2.68
  -1  -7  14    6.47    3.36
  -1  -7  14    2.91    3.29
  -1   7  14   -0.90    2.69
   1  -7 -14    5.21    2.94
   1   7 -14    2.71    2.69
  -1  -7  14   -0.39    2.11
  -1  -7  14    0.32    1.64
   1   7 -14   -0.47    2.49
   1  -7 -14    2.59    2.66
  -1  -7  14    1.68    1.97
  -1  -7  14    2.78    3.14
  -1   7  14    0.81    2.14
   1  -7 -14    0.61    2.62
   1  -7 -14    2.56    2.19
  -1   7  14    0.73    1.66
  -1  -7  14   -0.90    2.03
  -1   7  14   -0.43    1.90
  -1   7  14    3.58    2.53
  -1  -7  14    2.80    2.91
  -1   7  13  216.43   21.42
  -1  -7  13  185.14   21.40
  -1   7  13  232.97   21.79
  -1  -7  13  120.60   19.97
  -1   7  13  114.35   19.66
  -1  -7  13  239.18   22.04
   1  -7 -13  251.16   22.33
   1   7 -13  227.61   21.38
  -1  -7  13  246.14   19.25
  -1  -7  13  234.15   18.88
   1   7 -13  215.29   19.47
  -1   7  13  231.18   19.19
   1  -7 -13  198.19   19.59
  -1  -7  13  220.48   19.24
   1  -7 -13  235.87   20.31
  -1   7  13  274.04   19.73
  -1  -7  13  200.81   19.12
  -1   7  13  259.55   19.29
   1  -7 -13  268.77   19.74
   1  -7 -13  238.32   21.60
  -1  -7  13  203.51   21.36
   1   7 -13  160.94   20.60
  -1   7  12   10.08    3.76
  -1  -7  12    8.04    3.42
   1  -7 -12    9.43    2.99
  -1  -7  12    7.21    2.41
  -1  -7  12   11.05    2.45
  -1  -7  12    3.98    2.85
  -1   7  12    5.35    3.10
   1   7 -12   10.90    3.25
   1  -7 -12    4.20    3.11
  -1   7  12    4.61    2.18
   1  -7 -12   13.84    3.40
  -1  -7  12   13.25    2.92
   1   7 -12    2.91    2.47
  -1  -7  12    8.29    3.78
  -1   7  12    7.53    2.25
  -1  -7  12    8.24    2.51
  -1  -7  12   11.46    2.94
   1   7 -12    1.70    2.03
   1  -7 -12    4.42    2.56
  -1   7  11   -0.70    2.27
  -1  -7  11   -0.72    2.04
   1  -7 -11   -0.45    1.96
  -1  -7  11   -0.32    1.67
  -1  -7  11   -1.20    1.46
   1  -7 -11    1.54    2.61
  -1   7  11   -2.74    2.32
  -1  -7  11   -0.72    2.23
   1   7 -11   -0.66    1.95
   1  -7 -11   -0.88    2.35
  -1  -7  11   -0.67    1.57
  -1   7  11    0.32    1.60
  -1  -7  11   -0.71    1.53
  -1   7  11    0.68    1.46
  -1  -7  11    1.00    1.81
   1   7 -11    3.21    2.82
   1  -7 -11   -0.66    1.52
  -1  -7  11    0.76    2.14
  -1   7  10    6.15    2.53
  -1  -7  10    7.06    2.83
   1  -7 -10   10.32    3.48
  -1   7  10    7.87    3.17
  -1  -7  10    9.56    3.12
   1   7 -10    5.26    2.65
  -1  -7  10    8.41    2.10
  -1  -7  10   10.04    2.32
   1  -7 -10    9.32    2.77
   1   7 -10    8.69    2.23
  -1  -7  10    7.96    2.14
  -1  -7  10    8.28    3.10
  -1  -7  10    5.35    2.41
   1  -7 -10    7.62    2.82
   1   7 -10   10.46    3.28
  -1   7   9    6.84    2.54
   1  -7  -9    6.01    2.65
  -1  -7   9    8.41    2.90
   1   7  -9    4.13    2.49
  -1  -7   9    7.28    2.03
   1  -7  -9    7.23    2.39
   1  -7  -9    5.89    2.00
   1   7  -9    9.88    2.22
  -1  -7   9    9.32    2.12
   1   7  -9   11.13    3.32
  -1  -7   9    5.15    2.40
   1  -7  -9    7.26    2.60
   1  -7  -9    8.79    2.32
  -1   7   8   37.49    5.57
   1   7  -8   41.91    5.78
   1  -7  -8   52.01    6.37
   1  -7  -8   45.39    5.24
   1   7  -8   49.40    6.87
   1  -7  -8   63.91    6.42
  -1  -7   8   47.33    6.00
   1   7  -8   46.21    5.22
   1  -7  -7  988.90   82.27
  -1   7   7  927.33   81.87
   1   7  -7 1031.65   82.20
   1  -7  -7  987.22   81.32
   1   7  -7 1030.91   81.45
   1   7  -7 1060.95   81.39
   1  -7  -7 1143.93   82.47
  -1  -7   7 1095.66   82.49
   1   7  -7  995.59   83.37
   1  -7  -6  425.35   33.83
   1   7  -6  368.41   33.93
   1  -7  -6  386.79   33.76
   1   7  -6  367.70   33.51
  -1  -7   6  419.84   34.05
   1  -7  -6  440.59   33.80
   1   7  -6  484.23   35.56
   1  -7  -5    1.94    1.75
   1   7  -5   -0.33    1.50
   1  -7  -5    0.94    1.35
   1   7  -5    0.92    1.32
   1  -7  -5    0.30    1.12
  -1  -7   5    1.11    1.93
   1   7  -4   30.84    3.77
   1  -7  -4   25.48    4.17
   1  -7  -4   34.18    4.01
   1   7  -4   29.91    4.41
   1   7  -4   29.68    3.97
   1  -7  -4   28.17    3.80
   1  -7  -4   35.13    3.87
   1   7  -3  417.34   31.82
   1  -7  -3  388.40   31.68
   1  -7  -3  345.03   31.51
   1   7  -3  444.05   31.86
   1  -7  -3  324.55   31.57
   1   7  -3  356.02   31.83
  -1  -7   3  482.10   32.70
   1  -7  -3  409.57   31.81
   1   7  -3  497.83   34.28
   1  -7  -2  736.99   67.32
   1  -7  -2  795.78   67.32
   1   7  -2  788.06   67.61
   1   7  -2  945.83   67.60
  -1   7   2 1007.88   68.58
   1   7  -2 1159.32   70.66
  -1  -7   2 1040.86   68.70
   1  -7  -1  152.26   14.05
   1   7  -1  181.99   14.36
   1   7  -1  182.78   14.28
   1  -7  -1  170.36   14.10
  -1  -7   1  243.26   15.93
   1   7  -1  277.46   17.95
  -1   7   1  234.11   15.82
   1  -7  -1  184.40   14.92
  -1  -7   0  902.86   65.91
   1  -7   0  734.49   65.32
  -1   7   0  833.52   65.79
   1   7   0  907.43   67.26
  -1  -7  -1  280.74   21.66
   1  -7   1  245.15   21.45
  -1   7  -1  238.50   21.52
   1  -7   1  263.36   21.80
   1   7   2    9.07    1.87
   1  -7   2    7.96    1.93
   1  -7   2   11.14    2.06
   1   7   2   11.07    2.00
  -1  -7  -2   14.54    2.55
   1  -7   2   17.74    2.94
  -1   7  -2    9.48    2.45
   1  -7   2   12.47    2.61
  -1  -7  -3 2084.00  161.05
   1  -7   3 2188.00  161.54
   1  -7   3 2048.25  161.81
  -1   7  -3 2067.34  161.47
   1   7   3 2141.62  161.05
   1   7   3 2035.15  160.93
   1  -7   3 1951.03  161.03
   1  -7   3 1921.49  160.96
  -1  -7  -4  776.27   60.38
   1  -7   4  818.67   60.92
   1  -7   4  844.85   61.79
  -1   7  -4  759.96   60.99
   1   7   4  791.95   60.69
   1   7   4  713.38   60.44
   1  -7   4  746.98   60.61
   1  -7   4  729.84   60.62
   1   7   4  745.78   60.57
   1  -7   4  669.68   60.54
   1  -7   5    2.23    2.77
   1   7   5    0.38    1.56
   1  -7   5   -0.77    1.54
   1   7   5    1.46    1.53
   1  -7   5    3.23    2.04
   1  -7   5    0.37    1.63
  -1   7  -5   -0.42    1.48
   1   7   5    0.38    1.48
   1  -7   5   -0.41    1.75
   1  -7   6   41.86    6.12
   1   7   6   52.73    6.14
   1   7   6   45.07    5.87
   1   7   6   47.14    5.85
   1  -7   6   45.59    6.11
   1  -7   6   49.37    6.10
   1  -7   6   57.24    7.24
   1  -7   6   49.07    5.92
  -1   7  -6   49.32    6.18
   1  -7   6   40.48    6.07
   1   7   6   46.22    5.87
   1  -7   7  164.16   16.89
   1   7   7  177.73   16.86
   1   7   7  177.53   16.87
   1  -7   7  192.04   17.42
   1  -7   7  174.10   17.27
   1   7   7  184.38   16.82
   1  -7   7  191.39   16.43
  -1   7  -7  190.89   17.12
   1   7   7  175.77   16.81
   1  -7   7  183.76   17.34
   1  -7   8   13.16    3.63
   1   7   8   14.34    3.23
   1  -7   8   10.88    3.52
   1   7   8    9.60    3.02
   1  -7   8    5.53    3.06
   1   7   8   15.40    3.37
   1  -7   8   14.84    2.82
  -1   7  -8    5.29    2.57
   1   7   8   10.09    1.76
   1  -7   8    2.06    2.61
   1   7   8   11.19    2.97
   1  -7   9  164.60   16.09
   1  -7   9  140.94   13.84
   1   7   9  154.85   15.23
   1  -7   9  146.01   13.48
   1  -7   9  154.88   15.93
   1  -7   9  144.96   15.53
   1   7   9  130.46   14.78
   1  -7   9  149.00   15.70
   1   7   9  153.72   15.10
   1   7   9  146.12   15.09
   1   7   9  138.82   12.78
   1  -7   9  158.25   13.99
  -1   7  -9  173.66   15.51
   1  -7   9  167.02   16.46
  -1  -7 -10   12.08    3.67
   1  -7  10    9.89    2.34
   1  -7  10    9.25    2.70
   1   7  10   16.57    4.05
   1  -7  10   17.07    4.63
   1  -7  10   17.56    4.62
   1   7  10   11.03    3.75
   1  -7  10   14.33    4.39
   1   7  10    7.70    3.29
   1  -7  10   19.87    5.12
   1   7  10   11.48    2.59
   1   7  10   11.58    2.12
   1  -7  10   15.19    3.20
   1   7  10   18.42    3.16
   1   7  10   11.68    2.79
   1  -7  10   10.14    2.80
   1   7  10   12.22    2.74
   1  -7  10    8.88    3.76
   1   7  10   15.41    4.14
  -1  -7 -11    1.65    2.46
   1  -7  11    3.37    1.74
   1  -7  11    3.42    2.26
   1  -7  11    2.81    3.18
   1   7  11    3.40    2.53
   1  -7  11    0.96    2.72
   1   7  11    0.89    2.51
   1  -7  11    2.95    2.78
   1   7  11    4.34    2.95
   1  -7  11    3.03    3.43
   1  -7  11    2.71    2.13
   1   7  11    0.80    1.78
   1  -7  11    2.44    2.15
   1   7  11    4.38    2.07
   1   7  11    1.52    1.16
   1  -7  11    3.56    2.37
   1   7  11    2.01    1.90
   1  -7  11    3.90    3.18
   1   7  11    1.35    1.95
   1  -7  11    2.51    2.37
   1   7  11    3.48    3.17
   1  -7  12  115.69   14.53
   1   7  12  101.23   13.56
   1  -7  12  112.05   12.13
   1   7  12  105.54   11.47
   1  -7  12  122.25   12.03
   1   7  12  120.63   12.00
   1  -7  12  124.10   11.73
   1  -7  12  109.64   10.95
   1   7  12  103.72   13.68
   1   7  12  119.90   14.13
   1  -7  12  114.34   14.26
   1  -7  12  121.47   14.67
   1  -7  12  116.08   14.64
   1   7  12   95.99   13.30
   1  -7  12  122.14   12.10
   1   7  12  136.94   12.05
   1   7  12  124.81   10.80
   1   7  12  137.66   12.27
   1  -7  12  126.93   12.34
   1  -7  12  112.10   14.31
  -1   7 -12  138.65   14.27
  -1  -7 -12  142.36   14.46
   1  -7  13   36.27    5.94
   1   7  13   43.60    6.19
   1  -7  13   44.37    6.18
   1   7  13   44.92    6.01
   1   7  13   42.84    7.90
   1  -7  13   38.69    7.74
   1  -7  13   50.92    5.94
   1  -7  13   36.21    4.85
  -1  -7 -13   49.75    7.82
  -1   7 -13   45.68    7.44
   1  -7  13   46.61    8.50
   1  -7  13   42.24    6.12
   1   7  13   40.38    5.79
   1  -7  13   46.48    6.38
   1   7  13   60.16    6.65
   1  -7  13   29.50    7.67
   1   7  13   61.27    8.94
   1  -7  13   34.40    7.41
   1   7  13   58.69    8.74
   1   7  13   42.47    7.82
   1  -7  13   41.06    7.83
   1  -7  14    4.48    3.68
   1   7  14    5.29    3.18
   1  -7  14   10.19    4.15
  -1   7 -14   10.05    3.77
  -1  -7 -14    8.72    3.55
  -1   7 -14    5.35    2.52
   1  -7  14    7.33    2.72
   1  -7  14    8.69    3.11
   1   7  14    5.88    2.80
   1  -7  14    6.74    4.25
   1   7  14    3.21    2.46
   1  -7  14    3.91    2.66
   1   7  14    7.33    2.98
   1  -7  14    7.47    2.96
   1  -7  14    5.07    2.98
   1   7  14    6.58    2.86
   1   7  14    3.27    2.93
   1  -7  15   92.10    8.78
  -1   7 -15   91.07    8.91
   1   7  15   87.71    9.16
   1  -7  15   78.23    9.11
  -1  -7 -15   71.62    8.91
   1  -7  15   76.32    9.17
   1   7  15   75.83    9.02
  -1  -7 -15   92.78    8.88
   1   7  15   79.34    9.13
   1  -7  15   69.81    8.83
   1  -7  15   74.57    9.07
   1   7  15   81.79    9.03
   1  -7  16  156.97   14.67
  -1   7 -16  172.40   15.12
   1   7  16  163.76   15.20
   1  -7  16  163.28   15.34
  -1  -7 -16  165.80   15.39
   1   7  16  172.71   15.51
   1  -7  16  153.32   15.38
  -1  -7 -16  182.97   15.09
   1   7  16  151.59   15.02
   1  -7  16  150.22   15.28
   1  -7  16  154.77   15.11
   1   7  16  163.87   15.37
  -1   7 -17    0.37    1.69
   1  -7  17    5.48    2.14
   1   7  17    4.27    2.30
  -1  -7 -17    5.65    2.62
  -1   7 -17    3.04    2.31
   1  -7  17    6.53    2.64
  -1  -7 -17    7.05    2.46
   1   7  17    2.14    2.29
   1  -7  17    1.81    2.14
   1   7  17    5.73    2.45
   1  -7  17    3.94    2.42
   1   7  17    5.13    2.36
   1  -7  17    5.03    2.56
   1  -7  18    0.94    1.47
  -1   7 -18    1.22    1.63
   1   7  18    4.60    1.95
  -1  -7 -18   -0.92    2.07
   1   7  18    0.89    1.69
  -1   7 -18   -1.62    1.84
   1  -7  18    2.25    2.00
   1   7  18    1.65    1.80
   1  -7  18    3.95    1.97
   1  -7  18   -1.34    1.05
   1   7  18   -0.33    1.56
   1  -7  18    1.48    1.84
   1   7  18    0.88    1.83
   1  -7  19   18.47    1.92
  -1   7 -19   32.10    2.79
   1   7  19   21.03    2.48
   1   8 -20   -0.45    0.73
   1  -8 -19   35.51    4.49
   1  -8 -19   44.71    4.32
   1   8 -19   49.43    4.57
  -1  -8  18  107.59    6.04
   1   8 -18  104.87    5.87
   1  -8 -18   94.63    6.41
  -1   8  18   86.81    3.93
   1  -8 -18  107.27    5.60
  -1   8  18   78.32    5.16
  -1  -8  17    0.37    2.28
  -1  -8  17    1.07    1.29
   1   8 -17    0.35    1.45
   1   8 -17    2.78    2.01
  -1   8  17    2.66    1.22
  -1  -8  17    1.04    1.96
  -1   8  17   -0.32    1.60
   1  -8 -17    3.67    2.49
   1  -8 -17    1.55    2.47
  -1   8  17    2.05    1.30
   1  -8 -17    4.99    2.09
  -1  -8  17    3.06    1.90
  -1  -8  17   -1.13    1.23
  -1   8  17   -0.64    1.81
   1   8 -17   -0.34    1.41
  -1  -8  16  185.22   12.12
   1   8 -16  143.23   11.75
  -1   8  16  153.97   10.30
  -1  -8  16  147.20   10.59
  -1   8  16  137.64   11.06
   1  -8 -16  115.45   11.15
   1   8 -16  130.55   11.36
  -1  -8  16  134.78   11.34
   1  -8 -16  155.85   12.76
   1  -8 -16  172.13   11.81
  -1  -8  16  176.40   12.05
  -1   8  16  149.48   10.86
  -1   8  16   70.71   10.16
  -1  -8  16   49.65    9.91
   1   8 -16   29.04    9.43
  -1   8  16  142.93   11.23
  -1  -8  15  123.98    9.93
  -1  -8  15  104.60    8.93
   1   8 -15   91.30    9.77
   1  -8 -15   99.96    9.74
  -1   8  15   98.66    9.16
  -1  -8  15  102.39    9.44
   1   8 -15  105.94    9.80
   1  -8 -15  133.68   11.24
   1  -8 -15  107.72    9.55
  -1   8  15  118.15    9.31
  -1  -8  15  110.49    9.78
  -1  -8  15   92.30    9.40
  -1   8  15  102.97    9.25
   1  -8 -14   23.96    5.10
   1   8 -14   26.42    5.90
  -1  -8  14   29.02    4.32
  -1  -8  14   34.93    4.11
  -1   8  14   33.84    4.22
   1  -8 -14   15.92    4.23
  -1  -8  14   26.45    5.98
  -1  -8  14   26.78    4.24
   1   8 -14   23.68    4.49
   1  -8 -14   38.79    5.43
  -1  -8  14   27.54    4.25
  -1   8  14   21.52    3.61
  -1  -8  13  201.56   22.93
   1   8 -13  188.92   22.90
  -1  -8  13  247.81   21.11
  -1  -8  13  262.55   21.01
  -1   8  13  247.71   21.00
   1  -8 -13  216.60   21.41
   1  -8 -13  275.22   22.49
  -1  -8  13  248.85   21.26
  -1   8  13  280.68   21.30
  -1  -8  13  233.97   23.67
   1  -8 -13  254.82   23.42
   1   8 -13  199.32   23.40
  -1   8  12    6.66    3.16
   1  -8 -12   14.10    3.49
  -1  -8  12   11.58    2.71
  -1  -8  12   12.68    2.92
   1   8 -12   15.10    3.74
   1   8 -12   10.14    3.47
  -1  -8  12    7.07    3.08
  -1  -8  12    7.39    3.12
  -1  -8  12    8.80    3.62
   1  -8 -12   11.19    3.31
  -1   8  12   12.12    2.72
  -1   8  12   13.53    2.78
  -1  -8  12   13.95    2.93
  -1  -8  12   11.82    3.16
   1   8 -12   11.36    4.07
   1  -8 -12   15.58    3.79
  -1   8  11   -0.67    2.07
  -1  -8  11    1.30    1.76
  -1  -8  11    1.41    1.94
   1  -8 -11    0.49    2.00
   1   8 -11    1.31    1.74
  -1  -8  11   -0.71    2.00
   1   8 -11    2.13    2.58
  -1  -8  11    0.35    1.55
   1  -8 -11    2.88    2.09
  -1   8  11    0.35    1.48
   1  -8 -11    2.72    2.30
  -1  -8  11    0.82    2.31
   1   8 -11    1.80    3.17
  -1  -8  11    0.54    1.98
  -1  -8  10  183.82   20.38
  -1   8  10  188.80   20.10
  -1  -8  10  239.64   19.35
   1  -8 -10  216.03   19.85
  -1  -8  10  239.59   19.22
   1  -8 -10  217.58   20.98
   1   8 -10  178.56   20.26
   1   8 -10  198.14   20.28
  -1  -8  10  220.76   20.76
   1   8 -10  241.02   19.56
  -1   8  10  248.65   19.46
   1  -8 -10  269.13   19.88
  -1  -8  10  218.46   19.14
  -1  -8  10  200.11   20.03
   1  -8 -10  254.77   21.10
   1   8 -10  207.19   21.63
  -1  -8  10  230.47   21.58
  -1   8   9   83.73   10.16
  -1  -8   9   84.20   10.57
   1  -8  -9   87.49    9.86
  -1  -8   9  103.25    9.63
  -1  -8   9  102.13    9.51
   1  -8  -9  111.04    9.99
   1   8  -9  121.23    9.99
  -1  -8   9  110.14   10.78
   1  -8  -9  108.75   10.82
  -1  -8   9   95.05   11.16
   1   8  -9   97.32   11.88
  -1   8   9  119.67    9.77
   1  -8  -9  120.09   10.08
   1  -8  -9   96.28   11.05
  -1  -8   9   95.86   10.74
   1   8  -9  101.63   10.58
   1  -8  -9   95.41   10.87
   1   8  -9   60.74   10.12
  -1  -8   8   22.22    4.34
  -1   8   8   28.92    4.35
   1   8  -8   24.39    4.17
   1   8  -8   16.55    4.39
   1  -8  -8   32.85    4.95
   1  -8  -8   39.87    5.39
  -1   8   8   27.47    4.19
  -1  -8   8   21.16    4.11
   1  -8  -8   30.98    4.29
   1  -8  -8   34.55    4.28
   1   8  -8   39.49    4.28
   1  -8  -8   36.78    4.42
   1   8  -8   31.39    3.99
  -1  -8   8   29.34    4.77
   1   8  -8   29.36    5.55
   1  -8  -8   34.36    4.84
  -1   8   7   23.57    3.79
   1  -8  -7   24.79    4.18
   1   8  -7   26.27    4.14
   1  -8  -7   29.11    4.51
   1   8  -7   20.74    4.27
  -1  -8   7   33.76    4.58
   1   8  -7   28.80    3.83
   1  -8  -7   34.95    4.50
   1   8  -7   30.84    5.60
  -1  -8   7   40.73    5.12
   1   8  -7   29.84    3.79
   1   8  -7   30.93    3.93
   1  -8  -7   33.90    3.94
  -1   8   7   30.72    3.80
  -1   8   7   21.96    3.84
  -1  -8   6  125.96   11.41
   1  -8  -6  146.77   11.32
   1   8  -6  118.05   10.32
  -1   8   6  116.59   10.17
   1  -8  -6  132.96   10.44
   1   8  -6  129.79   10.66
   1   8  -6  122.53   10.46
   1  -8  -6  107.63   10.72
   1   8  -6   91.85   11.07
   1  -8  -6   68.73   10.63
   1   8  -6   87.44   10.29
   1   8  -6  108.75   10.93
  -1  -8   5    0.84    2.04
   1  -8  -5    2.31    1.55
   1   8  -5    0.64    1.48
   1   8  -5    0.38    2.16
   1  -8  -5   -0.72    1.93
   1   8  -5   -0.29    1.06
   1   8  -4    5.91    3.15
   1  -8  -4    2.62    1.42
   1  -8  -4   -1.58    1.65
   1   8  -4    2.08    1.27
   1   8  -4    1.53    1.36
   1   8  -3  468.19   33.29
  -1  -8   3  420.29   31.11
   1  -8  -3  379.16   30.28
   1   8  -3  327.45   29.66
  -1  -8   2    5.58    2.20
  -1   8   2    6.93    2.21
   1   8  -2    5.50    3.08
   1   8  -1  159.31   14.91
  -1   8   1  142.73   13.42
  -1  -8   1  146.73   13.38
  -1  -8   0   22.68    3.54
   1   8   0   21.80    4.48
  -1   8   0   18.93    3.31
   1  -8   0   17.43    2.90
  -1   8  -1  472.24   37.33
   1  -8   1  464.62   37.41
  -1  -8  -1  508.00   37.26
   1  -8   1  385.83   36.68
  -1  -8  -2  190.44   15.39
   1  -8   2  161.54   15.33
  -1   8  -2  161.65   15.35
   1  -8   2  169.07   15.56
   1   8   3  431.68   31.36
   1  -8   3  450.38   32.65
  -1   8  -3  428.63   32.55
  -1  -8  -3  468.31   32.26
   1  -8   3  447.50   32.91
   1  -8   4  236.43   23.38
   1   8   4  277.05   23.51
  -1  -8  -4  266.70   23.63
   1  -8   4  324.98   25.31
  -1   8  -4  319.62   24.62
   1  -8   4  312.22   24.44
   1   8   5  253.65   23.07
   1   8   5  283.82   23.20
   1  -8   5  235.70   22.97
  -1   8  -5  281.12   23.80
   1  -8   5  307.52   24.84
   1  -8   5  314.65   23.86
   1   8   5  282.21   23.29
   1  -8   5  239.63   23.02
   1  -8   6   -0.46    1.92
  -1   8  -6   -0.53    1.87
   1   8   6    1.63    0.96
   1   8   6    3.17    1.60
   1  -8   6    3.31    2.04
   1   8   6    1.36    1.66
   1   8   6    3.48    1.69
   1  -8   6    0.93    1.58
   1  -8   6    0.89    1.78
  -1   8  -7  189.57   17.07
   1  -8   7  228.36   18.71
   1  -8   7  176.88   16.24
   1   8   7  161.84   16.14
   1   8   7  165.95   16.36
   1  -8   7  163.40   16.50
   1  -8   7  162.95   16.45
   1   8   7  171.82   14.83
   1   8   7  180.79   16.54
   1  -8   7  183.28   16.90
   1   8   8  114.16   11.73
   1  -8   8  114.39   12.20
  -1   8  -8  113.98   10.48
   1  -8   8  105.31   10.26
   1  -8   8  108.30   10.45
   1   8   8  110.06   11.56
   1  -8   8   99.45   11.80
   1   8   8  113.84   11.79
   1  -8   8   93.91   11.65
   1  -8   8  108.12   12.09
   1   8   8  108.51    9.80
   1  -8   8  102.17   11.04
   1  -8   8  126.09   13.26
  -1   8  -8  133.51   12.52
   1  -8   9    0.32    1.51
   1  -8   9   -0.74    1.90
  -1   8  -9    0.75    1.65
   1  -8   9    1.77    1.77
  -1   8  -9    0.72    2.13
   1  -8   9   -0.78    2.31
   1   8   9   -0.68    1.93
   1  -8   9    0.78    2.32
   1   8   9    1.96    2.13
   1   8   9    0.25    0.95
   1   8   9   -0.68    2.21
   1  -8   9   -0.79    2.46
   1   8  10  128.84   12.66
   1  -8  10   95.96   10.34
   1  -8  10   98.59   10.00
  -1   8 -10  107.58   10.46
   1  -8  10   86.03   12.22
   1   8  10   86.40   11.49
   1  -8  10   94.65   12.49
   1   8  10  106.15   11.88
   1  -8  10   95.50   10.51
   1   8  10  125.57    9.84
  -1   8 -10  122.46   12.69
   1  -8  11   11.33    3.05
   1  -8  11    9.36    2.38
  -1   8 -11    7.26    2.41
   1   8  11    5.74    2.83
   1  -8  11    2.88    3.04
   1  -8  11   12.60    4.11
   1  -8  11    2.13    3.50
   1  -8  11    7.30    2.65
   1   8  11    7.29    1.76
   1   8  11    7.38    2.48
   1  -8  11    3.46    2.56
   1   8  11   14.38    4.17
  -1   8 -12   25.09    3.96
   1  -8  12   18.49    3.33
   1  -8  12   20.32    3.86
   1  -8  12   16.40    5.22
   1   8  12   23.27    5.05
   1  -8  12   24.35    5.88
   1   8  12   16.47    3.45
   1   8  12   17.41    2.80
   1  -8  12   16.53    3.83
   1   8  12   19.32    4.96
   1   8  12   23.89    3.86
   1   8  12   14.56    3.45
   1  -8  12   19.30    4.10
   1   8  13   42.89    6.02
   1   8  13   45.32    5.85
   1  -8  13   40.50    6.07
   1  -8  13   31.69    4.90
  -1   8 -13   46.55    5.91
   1  -8  13   40.43    5.23
   1  -8  13   47.30    5.98
   1  -8  13   51.13    8.83
   1  -8  13   52.76    6.49
   1   8  13   52.58    6.11
   1   8  13   44.14    4.86
   1  -8  13   40.26    6.07
  -1  -8 -13   58.11    6.00
  -1   8 -13   48.37    7.81
   1  -8  14  173.62   15.50
   1  -8  14  155.61   15.61
   1   8  14  158.85   15.35
   1  -8  14  172.08   14.79
  -1   8 -14  184.68   15.62
  -1  -8 -14  186.24   15.47
   1   8  14  167.58   15.68
   1  -8  14  154.41   15.77
   1  -8  14  146.26   15.63
   1   8  14  172.58   15.53
   1   8  14  156.91   15.57
   1  -8  15  103.25   10.15
  -1   8 -15  107.14   10.24
   1   8  15   95.21   10.10
   1  -8  15  103.57   10.47
   1  -8  15   87.05   10.32
  -1  -8 -15  105.40   10.08
   1   8  15   92.30   10.21
   1  -8  15  110.79   10.77
   1   8  15   99.16   10.14
   1   8  15   94.34   10.28
   1   8  16   13.75    3.22
   1  -8  16   12.90    3.09
  -1   8 -16   18.23    3.26
   1  -8  16   15.72    3.43
  -1  -8 -16   13.30    3.20
   1   8  16   11.02    3.00
  -1   8 -16    7.22    2.84
  -1  -8 -16   13.97    3.51
   1  -8  16   15.12    3.33
  -1  -8 -16   22.30    3.51
   1   8  16   10.12    2.99
   1  -8  16   10.59    3.00
   1   8  16   14.73    3.26
   1   8  17   25.33    3.51
  -1   8 -17   28.31    3.44
   1  -8  17   23.05    3.08
   1   8  17   -0.92    1.23
  -1  -8 -17    5.00    1.81
  -1  -8 -17   21.40    3.36
   1   8  17   29.95    3.98
   1  -8  17   -0.76    1.12
  -1  -8 -17   35.93    3.68
   1   8  17   18.25    2.82
   1   8  18   21.41    3.41
   1  -8  18   18.07    2.83
  -1   8 -18   19.58    3.07
  -1  -8 -18   25.59    3.27
   1   8  18   15.49    2.98
   1   8  19   -1.17    1.53
   1  -8  19    1.14    0.88
  -1   8 -19   -0.34    0.88
   1   8  19    1.25    1.19
   1  -9 -19   26.07    3.57
   1   9 -19   29.55    3.41
   1  -9 -19   30.12    3.40
  -1  -9  19   32.06    3.74
  -1  -9  19   22.44    3.18
   1  -9 -18   21.50    3.55
  -1  -9  18   16.73    3.15
   1   9 -18   21.24    3.04
  -1   9  18   10.95    1.86
   1  -9 -18   22.44    3.09
  -1   9  18   10.51    2.24
   1  -9 -17   28.06    4.20
  -1  -9  17   26.86    2.63
   1   9 -17   27.17    3.47
  -1  -9  17   32.15    4.07
   1   9 -17   23.11    3.17
  -1   9  17   26.16    2.65
   1  -9 -17   33.83    3.82
  -1   9  17   25.03    3.22
  -1   9  16   18.46    3.03
   1   9 -16   20.52    3.62
  -1  -9  16   22.46    3.98
  -1  -9  16   15.63    2.89
  -1   9  16   18.82    2.54
   1   9 -16   14.21    3.36
   1  -9 -16   20.04    4.39
   1   9 -15  328.33   25.52
   1   9 -15  239.79   25.02
  -1  -9  15  277.59   24.33
  -1   9  15  301.57   24.56
  -1  -9  15  295.40   24.93
   1  -9 -15  308.24   26.08
  -1  -9  14  110.83   10.62
   1   9 -14   92.52   11.30
   1  -9 -14  127.23   12.30
  -1   9  14  105.58   10.55
  -1  -9  14  117.58   11.06
  -1  -9  13   67.47    7.33
  -1  -9  13   63.96    6.98
  -1  -9  13   43.91    8.30
   1  -9 -13   57.06    7.78
   1  -9 -13   65.00    7.31
  -1   9  13   69.17    7.03
   1  -9 -13   61.26    8.58
   1   9 -13   54.04    9.14
  -1  -9  12   53.80    6.49
   1  -9 -12   59.73    7.15
  -1  -9  12   46.41    8.01
  -1  -9  12   58.65    6.32
  -1   9  12   52.43    6.19
   1  -9 -12   55.79    6.62
  -1  -9  12   42.98    6.71
   1  -9 -12   59.47    7.85
   1   9 -12   43.78    8.41
   1  -9 -11    4.15    2.85
  -1  -9  11    0.70    1.99
  -1  -9  11    1.56    2.17
  -1  -9  11    4.39    2.86
  -1   9  11    0.37    1.53
   1  -9 -11    3.06    2.18
  -1  -9  11    2.95    2.29
   1   9 -11    2.01    2.68
   1  -9 -11    4.20    2.28
   1  -9 -10   13.59    3.38
   1  -9 -10    9.90    2.92
  -1  -9  10   10.75    2.91
  -1  -9  10   10.44    2.66
   1  -9 -10   13.27    3.01
  -1   9  10   11.35    2.57
   1   9 -10    8.05    2.46
  -1  -9  10    7.02    2.91
   1   9 -10    8.63    4.10
   1  -9 -10    6.99    2.84
   1  -9  -9   14.46    3.13
   1  -9  -9   12.25    2.84
  -1  -9   9    5.86    2.30
   1  -9  -9    6.92    2.38
   1   9  -9    5.08    2.10
  -1  -9   9   13.18    3.43
   1   9  -9   16.40    4.58
   1  -9  -9    7.50    2.68
   1  -9  -8   -1.94    1.97
   1  -9  -8    1.41    1.69
  -1  -9   8    1.58    1.80
   1  -9  -8   -1.41    1.75
   1   9  -8    1.03    1.58
   1   9  -8   -0.64    1.40
  -1  -9   8    0.56    2.02
   1   9  -8   -2.60    2.45
  -1  -9   8   -0.68    2.23
   1  -9  -8   -1.04    1.47
   1  -9  -7  351.72   30.84
  -1  -9   7  374.92   30.59
   1  -9  -7  370.58   30.84
   1   9  -7  393.47   30.97
   1   9  -7  370.86   30.76
   1  -9  -7  402.35   31.85
  -1  -9   7  393.12   32.10
   1  -9  -7  354.34   30.75
   1   9  -7  359.81   30.95
  -1   9   7  371.24   30.64
  -1  -9   6    5.07    2.58
   1  -9  -6    2.90    1.76
   1   9  -6    4.36    1.62
   1   9  -6    3.30    1.70
   1   9  -6    1.57    1.45
  -1   9   6    6.00    1.67
   1  -9  -6    4.98    1.81
   1   9  -5  464.07   36.94
   1  -9  -5  462.65   37.27
   1   9  -5  446.62   39.64
  -1  -9   5  495.24   37.99
   1   9  -5  446.45   36.71
   1   9  -5  430.77   36.82
   1  -9  -5  428.61   36.54
  -1   9   5  452.43   36.54
   1   9  -4  133.86   11.74
   1   9  -4  120.76   11.52
  -1   9   4  130.79   11.39
   1   9  -4  140.81   14.29
   1  -9  -4  124.82   11.82
  -1  -9   3    2.12    2.22
   1   9  -3   -0.75    2.82
   1  -9  -3    2.10    1.33
  -1  -9   2   -0.41    1.97
  -1   9   2    1.21    1.52
   1   9  -2    1.43    2.77
   1   9  -1   52.55    7.54
  -1   9   1   54.45    6.57
  -1  -9   1   61.64    6.70
   1  -9   0  306.93   28.05
   1   9   0  378.53   30.61
  -1   9   0  328.77   29.00
  -1  -9   0  384.91   29.07
   1  -9   1  125.04   12.55
   1  -9   1  141.62   13.33
  -1  -9  -1  158.83   13.23
  -1   9  -1  129.35   13.14
   1  -9   2  471.94   37.18
  -1   9  -2  453.43   37.15
  -1  -9  -2  460.16   36.71
   1  -9   2  390.14   36.47
   1  -9   3   27.11    4.61
  -1  -9  -3   28.63    4.39
  -1   9  -3   31.99    4.83
   1  -9   3   30.08    4.73
   1   9   4    3.28    1.13
   1   9   4    2.68    1.45
  -1  -9  -4    4.85    2.16
   1  -9   4    5.10    2.64
  -1   9  -4    2.10    2.05
   1  -9   4    2.36    2.36
   1   9   5   24.62    3.03
  -1   9  -5   25.88    4.56
   1  -9   5   26.27    4.61
   1   9   5   18.90    3.35
   1  -9   5   31.60    5.38
   1  -9   6   50.47    5.62
   1  -9   6   51.19    7.54
  -1  -9  -6   42.63    5.04
   1   9   6   44.95    4.84
   1  -9   6   51.41    6.58
  -1   9  -6   48.33    6.76
  -1  -9  -6   51.78    7.01
   1   9   6   46.74    5.61
   1  -9   7   16.68    4.83
   1  -9   7   10.46    2.57
   1  -9   7   12.00    2.70
  -1   9  -7   19.40    3.11
   1   9   7   14.52    2.32
   1  -9   7   12.37    3.34
  -1  -9  -7   16.23    4.11
  -1   9  -7   11.99    3.65
   1   9   7   16.58    3.01
  -1  -9  -8   28.81    3.86
   1  -9   8   25.45    5.79
   1  -9   8   20.93    3.66
  -1   9  -8   16.25    3.29
   1   9   8   22.73    3.06
   1  -9   8   18.57    4.03
  -1   9  -8   20.41    4.65
  -1  -9  -8   26.51    5.08
   1   9   8   21.79    3.69
  -1  -9  -9   11.42    2.88
   1  -9   9   11.75    4.15
   1   9   9   15.27    2.49
   1  -9   9    9.66    2.98
  -1   9  -9   10.33    3.73
  -1  -9  -9   15.92    4.30
  -1   9  -9   11.20    2.81
   1  -9   9   17.23    3.05
   1  -9   9   20.17    3.28
   1  -9  10   84.54    9.25
   1  -9  10   74.13    8.64
  -1   9 -10   88.69    9.21
   1  -9  10   90.99    8.86
  -1   9 -10   96.62   11.38
   1   9  10   85.36    8.26
  -1  -9 -10   94.58    8.93
   1  -9  11   14.51    3.03
   1  -9  11    9.75    2.65
   1  -9  11   13.18    3.40
  -1   9 -11    8.00    2.73
   1   9  11   12.19    2.26
  -1  -9 -11   15.21    2.96
  -1   9 -11   10.15    3.69
   1   9  12   22.86    3.21
  -1  -9 -12   25.71    4.14
   1  -9  12   19.44    5.76
   1  -9  12   19.42    3.63
  -1   9 -12   20.71    3.92
   1  -9  12   25.48    3.79
   1  -9  12   26.73    4.52
   1  -9  13   38.13    7.76
  -1  -9 -13   54.45    6.00
   1   9  13   47.12    4.97
  -1   9 -13   34.04    7.06
  -1   9 -13   50.71    5.95
   1  -9  13   45.66    5.37
   1  -9  13   42.65    6.02
   1  -9  13   36.42    5.11
  -1  -9 -14   12.85    3.00
   1   9  14    7.18    2.85
   1  -9  14    4.68    1.96
   1  -9  14   10.36    2.39
  -1   9 -14   12.83    3.08
   1  -9  14    8.27    2.94
   1  -9  15   76.38    8.47
  -1   9 -15   83.23    8.56
  -1  -9 -15   87.49    8.50
   1   9  15   74.86    8.63
   1  -9  16   68.65    7.53
  -1  -9 -16   74.90    8.24
   1   9  16   67.76    7.83
  -1   9 -16   77.23    7.71
  -1  -9 -16   79.57    7.66
   1   9  16   61.79    7.55
   1  -9  17   94.55    9.86
  -1  -9 -17  102.50   10.37
   1   9  17  115.44   10.49
  -1   9 -17  108.75   10.15
  -1  -9 -17  120.14   10.25
   1   9  17  105.21   10.20
   1  -9  18    0.80    1.87
   1   9  18    3.61    1.83
  -1   9 -18    0.90    1.24
   1  -9  18    1.20    1.38
  -1  -9 -18    2.51    1.57
   1   9  18    2.08    1.41
   1   9  19    1.43    1.16
  -1  -9 -19    1.41    1.05
   1  -9  19    0.17    1.17
   1 -10 -19   46.23    4.02
   1  10 -19   49.00    3.82
  -1 -10  19   58.10    4.30
   1 -10 -18   10.73    2.54
   1  10 -18   13.40    2.22
  -1 -10  18   14.58    2.65
   1 -10 -18   18.19    2.54
  -1 -10  18   13.76    2.25
   1 -10 -17   22.92    3.96
  -1 -10  17   27.72    3.97
  -1 -10  17   17.18    2.67
   1  10 -17   22.21    3.56
   1  10 -17   21.21    3.29
  -1  10  17   19.43    2.69
  -1  10  17   16.22    2.78
   1 -10 -16   22.55    4.10
  -1 -10  16   19.18    2.65
   1  10 -16   27.54    3.61
   1  10 -16   23.77    3.71
  -1 -10  16   35.57    4.14
  -1  10  16   23.41    2.81
  -1  10  16   22.98    3.14
   1 -10 -15   11.63    4.15
  -1  10  15   12.02    2.20
   1  10 -15   13.00    3.17
  -1 -10  15   12.74    2.81
  -1 -10  15   12.11    3.23
   1  10 -15   13.62    3.56
   1 -10 -15   11.53    3.20
  -1  10  15   15.99    2.77
  -1  10  15    5.76    2.49
  -1 -10  14  314.57   26.78
   1 -10 -14  326.41   27.93
   1  10 -14  357.27   27.44
   1  10 -14  297.17   27.49
  -1 -10  14  300.63   26.36
   1 -10 -14  316.56   26.90
  -1  10  14  326.61   26.52
  -1  10  14  279.35   26.62
   1 -10 -13  198.20   18.96
  -1 -10  13  205.25   18.54
   1  10 -13  235.41   19.26
  -1 -10  13  212.23   18.33
   1 -10 -13  217.00   19.64
   1 -10 -13  227.12   18.91
  -1  10  13  196.11   18.16
   1  10 -13  151.11   20.68
   1 -10 -12   19.87    4.36
  -1 -10  12   13.60    4.55
   1 -10 -12   22.34    4.01
  -1  10  12   17.08    3.19
   1 -10 -12   18.18    4.21
   1  10 -12    6.78    3.73
  -1 -10  12   15.38    3.28
  -1 -10  12   15.56    3.64
  -1 -10  11  609.94   48.53
   1 -10 -11  583.00   49.04
  -1 -10  11  608.31   48.19
  -1  10  11  649.56   48.40
   1 -10 -11  607.01   48.65
   1 -10 -11  565.82   49.88
   1  10 -11  485.37   51.12
  -1 -10  11  534.96   49.28
   1 -10 -10  211.44   19.64
  -1 -10  10  195.53   19.03
   1 -10 -10  247.63   19.52
  -1 -10  10  212.67   18.88
   1 -10 -10  215.35   19.29
  -1  10  10  238.12   19.15
   1  10 -10  214.34   19.09
   1 -10 -10  220.19   20.51
   1  10 -10  187.46   21.73
  -1 -10  10  205.35   20.27
   1 -10  -9    6.10    2.69
   1 -10  -9    2.81    2.15
  -1 -10   9    6.63    2.63
   1 -10  -9    5.83    2.46
   1  10  -9    7.73    2.34
  -1 -10   9   10.16    3.19
   1  10  -9    5.15    3.38
  -1 -10   9   10.65    3.56
   1 -10  -9    4.28    2.27
   1 -10  -8  117.53   12.01
  -1 -10   8  106.91   11.59
   1  10  -8  146.76   12.09
   1 -10  -8  140.30   12.05
  -1 -10   8  127.17   11.65
   1 -10  -8  127.71   11.91
   1 -10  -8  110.05   12.50
  -1 -10   8  122.56   13.56
  -1 -10   8  138.77   13.31
   1  10  -8  117.86   11.54
   1 -10  -7   58.05    7.18
  -1 -10   7   63.62    7.14
   1  10  -7   78.06    7.46
   1 -10  -7   65.71    7.21
  -1 -10   7   71.43    7.13
  -1  10   7   88.31    7.44
   1  10  -7   71.04    7.54
   1 -10  -7   52.01    6.92
  -1 -10   7   64.86    8.28
   1 -10  -7   74.75    8.16
  -1 -10   7   65.29    8.58
   1  10  -7   72.10    7.18
   1 -10  -6    3.76    1.89
  -1  10   6    6.09    2.01
  -1 -10   6    4.06    1.73
  -1  10   6    6.35    1.91
   1 -10  -6    5.97    1.97
   1  10  -6    6.20    1.94
   1  10  -6    5.53    2.07
  -1 -10   6    7.48    2.99
   1  10  -6    8.45    4.25
   1 -10  -6    5.49    2.02
   1  10  -6    4.78    1.80
   1 -10  -6    7.47    2.30
   1 -10  -5   68.35    7.20
  -1  10   5   74.24    7.15
   1  10  -5   76.99    7.60
   1 -10  -5   60.83    7.48
   1  10  -5   76.38    9.99
   1  10  -5   71.92    7.25
  -1 -10   5   61.09    8.14
   1  10  -5   75.92    7.45
   1 -10  -4   45.11    5.20
  -1  10   4   42.31    4.92
   1  10  -4   41.36    5.20
   1 -10  -4   46.70    5.57
   1  10  -4   61.11    8.62
   1  10  -4   41.97    5.05
   1  10  -4   50.14    5.33
  -1  10   3   27.46    3.48
   1  10  -3   26.04    3.68
   1 -10  -3   33.94    3.94
   1  10  -3   22.39    3.56
  -1 -10   3   31.61    4.80
   1  10  -3   26.85    3.66
   1 -10  -3   29.39    3.99
   1  10  -3   33.76    6.20
   1  10  -2  102.98    9.32
  -1  10   2   87.79    8.91
   1  10  -2   94.10    9.19
  -1 -10   2  107.73   10.58
  -1  10   2   99.73   10.28
   1  10  -2  107.18    9.45
   1  10  -1  110.98   10.20
   1  10  -1  141.25   13.50
  -1  10   1  120.68   11.75
  -1 -10   1  128.97   11.72
   1  10  -1  100.19   10.15
   1  10   0  242.63   20.86
  -1  10   0  233.44   19.60
  -1 -10   0  252.53   19.37
   1  10   0  202.09   17.63
   1 -10   1   23.51    3.86
   1 -10   1   32.81    4.78
  -1 -10  -1   27.26    4.55
  -1  10  -1   31.55    5.06
   1  10   1   24.02    3.31
   1  10   1   21.07    3.22
   1 -10   2    3.86    1.98
   1 -10   2    3.41    2.45
  -1 -10  -2    3.91    1.66
  -1  10  -2    4.24    2.55
   1  10   2    1.09    1.15
   1  10   2    1.33    0.95
   1 -10   3  303.81   26.02
  -1 -10  -3  307.54   25.50
  -1  10  -3  293.90   26.01
   1  10   3  288.56   24.30
   1 -10   3  328.27   26.11
   1  10   3  266.56   23.81
   1 -10   4   20.88    4.47
   1  10   4   19.73    2.77
   1  10   4   22.26    3.42
  -1 -10  -4   24.50    4.19
   1 -10   4   18.63    4.32
  -1  10  -4   22.86    4.45
   1 -10   5  331.84   26.45
   1 -10   5  275.62   26.02
   1 -10   5  283.49   26.01
   1 -10   5  312.92   25.94
   1  10   5  393.95   26.99
   1  10   5  275.14   25.45
  -1  10  -5  295.16   27.71
   1 -10   5  323.06   27.75
   1 -10   5  366.06   28.96
   1  10   5  346.57   26.51
   1 -10   6   43.06    5.78
  -1 -10  -6   57.20    5.90
   1 -10   6   49.14    7.58
  -1  10  -6   44.55    5.64
   1 -10   6   60.34    6.02
   1  10   6   66.19    6.56
   1 -10   6   46.17    5.86
   1  10   6   47.47    5.23
  -1 -10  -6   50.53    5.43
   1 -10   6   48.97    7.02
  -1  10  -6   46.17    7.08
  -1 -10  -6   41.90    6.99
   1  10   6   55.61    6.16
  -1 -10  -7   45.58    5.43
   1 -10   7   42.30    5.55
   1 -10   7   46.52    7.58
  -1 -10  -7   37.20    5.01
   1  10   7   49.90    5.03
   1 -10   7   33.86    6.22
  -1 -10  -7   52.97    7.45
   1  10   7   61.30    6.16
  -1  10  -7   41.35    6.70
   1 -10   7   46.63    5.52
  -1  10  -7   46.87    5.55
   1 -10   7   41.41    5.53
  -1 -10  -8   50.90    6.48
  -1 -10  -8   65.50    6.55
   1  10   8   51.42    5.90
  -1  10  -8   52.90    8.15
  -1 -10  -8   76.60    9.11
   1  10   8   68.57    7.10
   1 -10   8   71.38    9.55
   1 -10   8   47.38    7.32
   1 -10   8   65.85    6.76
   1 -10   8   57.70    6.71
  -1  10  -8   54.39    6.62
  -1 -10  -9  121.81   11.35
   1 -10   9  108.21   10.96
  -1  10  -9  106.45   11.04
   1 -10   9  112.48   10.94
   1  10   9  107.73   10.31
  -1 -10  -9  119.62   10.95
   1 -10   9   89.88   13.10
  -1 -10  -9  133.55   13.76
  -1  10  -9  115.53   13.41
   1  10   9  121.46   11.50
  -1 -10 -10   27.77    4.42
  -1  10 -10   25.65    4.21
   1 -10  10   29.69    4.15
   1 -10  10   23.73    4.04
   1  10  10   21.71    3.30
  -1 -10 -10   21.61    3.81
  -1 -10 -10   28.28    5.71
  -1  10 -10   19.90    5.23
   1  10  10   24.42    4.36
   1 -10  10   26.20    6.36
   1 -10  11   67.21    7.83
   1 -10  11   71.04    7.76
  -1  10 -11   76.55    8.34
  -1 -10 -11   79.27    8.04
   1  10  11   74.35    7.36
  -1  10 -11   71.12   10.37
  -1 -10 -11   66.35    9.99
   1  10  11   83.47    8.71
   1 -10  11   76.95   11.32
   1 -10  12    5.47    2.23
   1 -10  12    3.84    2.82
  -1  10 -12    7.33    2.40
   1 -10  12    2.98    2.09
  -1 -10 -12   10.38    3.79
  -1  10 -12    6.23    3.41
   1  10  12    5.47    2.72
  -1 -10 -12    3.62    2.12
   1  10  12    9.48    1.96
   1 -10  13   21.61    3.51
   1 -10  13   16.51    3.15
   1 -10  13   23.73    4.39
  -1  10 -13   19.00    3.67
   1  10  13   25.79    4.31
  -1 -10 -13   23.06    3.81
   1  10  13   15.50    2.71
  -1  10 -14    1.65    1.94
   1 -10  14   -0.85    1.60
   1 -10  14    1.19    1.51
   1 -10  14   -0.43    2.30
   1  10  14    0.46    0.86
  -1 -10 -14    1.92    2.04
   1  10  14    1.84    2.16
   1  10  15    6.87    2.69
   1 -10  15    4.69    2.69
  -1  10 -15    9.72    2.58
  -1 -10 -15    2.16    2.00
   1  10  15    9.64    2.65
  -1 -10 -16   -0.43    2.30
   1  10  16    0.38    1.90
  -1  10 -16   -0.32    1.43
   1 -10  16    2.00    2.17
  -1 -10 -16    0.33    1.74
   1  10  16    0.36    1.78
   1 -10  17   90.83    9.18
   1 -10  17  117.28    9.82
   1  10  17  113.42    9.70
  -1 -10 -17   91.84    9.55
  -1  10 -17  104.61    9.31
  -1  10 -17   81.23    9.25
  -1 -10 -17  115.07    9.52
   1  10  17   90.87    9.32
   1 -10  18   89.04    7.28
   1  10  18   72.62    6.98
  -1  10 -18   58.42    6.51
  -1 -10 -18   91.41    7.22
   1  10  18   73.16    6.96
   1 -11 -18   14.87    2.74
  -1 -11  18   15.94    2.69
   1  11 -18   15.96    2.42
   1 -11 -17    2.74    2.24
   1  11 -17    2.33    1.80
  -1 -11  17    1.61    1.29
   1  11 -17    2.83    1.61
  -1 -11  17    1.80    2.08
  -1  11  17    1.79    1.10
  -1 -11  17    3.16    1.73
   1 -11 -16   17.36    3.72
  -1 -11  16   12.18    3.06
  -1 -11  16   13.94    2.46
   1  11 -16   10.44    2.54
   1  11 -16   11.06    2.90
  -1  11  16    8.87    2.02
   1 -11 -16    8.35    2.79
  -1 -11  16    9.97    2.50
   1 -11 -15   18.01    3.30
  -1  11  15   18.98    2.80
   1 -11 -15   17.11    4.07
  -1 -11  15   17.61    2.86
   1  11 -15   24.17    3.66
   1  11 -15    9.61    3.11
  -1 -11  15   18.88    3.54
  -1 -11  14   73.67    8.18
   1 -11 -14   76.53    9.14
   1  11 -14   74.66    8.21
   1  11 -14   65.69    8.52
  -1 -11  14   67.25    7.59
  -1  11  14   81.91    7.76
   1 -11 -14   79.23    8.26
  -1  11  14   69.15    7.61
   1 -11 -13   24.38    4.88
   1 -11 -13   33.37    5.62
   1 -11 -13   31.03    4.88
  -1  11  13   29.83    4.25
  -1  11  13   27.33    4.24
  -1 -11  13   29.10    4.46
  -1 -11  13   32.78    4.90
   1  11 -13   34.93    5.14
   1  11 -13   24.93    5.25
  -1 -11  12   95.31    9.92
   1 -11 -12   90.14   10.24
   1  11 -12  112.25   10.48
  -1 -11  12   86.37    9.42
  -1  11  12  107.88    9.64
   1 -11 -12   90.08    9.82
   1 -11 -12   88.67   10.96
   1  11 -12   67.12   11.63
   1 -11 -11   43.34    6.41
  -1 -11  11   44.82    5.62
  -1 -11  11   35.30    5.64
   1  11 -11   49.04    6.24
  -1 -11  11   49.33    7.86
   1 -11 -11   50.25    6.01
  -1  11  11   43.21    5.43
  -1 -11  11   31.49    6.09
   1  11 -11   29.90    7.38
   1 -11 -11   34.89    6.18
   1 -11 -10    1.07    2.55
   1  11 -10    3.65    1.90
  -1 -11  10   -0.46    2.36
  -1 -11  10   -0.94    3.20
   1 -11 -10   -0.43    2.11
   1 -11 -10   -1.41    2.20
   1  11 -10   -0.83    2.13
   1  11 -10    1.17    3.12
  -1 -11  10    0.70    2.45
   1 -11 -10    0.69    1.71
   1 -11  -9   17.88    3.93
   1 -11  -9   21.55    3.82
  -1 -11   9   21.79    4.09
   1 -11  -9   22.87    4.08
   1  11  -9   21.43    3.74
   1  11  -9   19.45    5.72
  -1 -11   9   22.30    4.82
   1 -11  -9   21.17    4.31
  -1 -11   9   17.71    4.84
  -1 -11   8  119.61   12.33
   1 -11  -8  129.24   12.72
   1 -11  -8  146.01   12.58
   1  11  -8  151.90   12.65
  -1 -11   8  142.66   12.43
   1 -11  -8  122.32   12.36
  -1  11   8  146.36   12.36
  -1 -11   8  121.44   14.06
  -1 -11   8  104.46   13.26
   1 -11  -8  107.91   12.99
   1 -11  -7  231.30   21.38
  -1 -11   7  227.88   21.18
   1 -11  -7  255.83   21.38
   1  11  -7  274.80   21.56
  -1 -11   7  264.82   21.31
   1  11  -7  243.54   21.54
   1 -11  -7  241.19   21.38
  -1  11   7  262.05   21.26
  -1 -11   7  250.73   22.99
   1 -11  -7  251.17   22.36
   1  11  -7  215.34   24.29
  -1 -11   7  205.92   22.67
   1  11  -7  248.41   21.21
   1 -11  -6   -0.38    1.78
   1 -11  -6   -0.36    1.71
  -1 -11   6   -0.97    1.81
  -1  11   6    0.38    1.52
  -1 -11   6    1.71    1.82
  -1  11   6    0.33    1.32
   1 -11  -6   -0.37    1.61
   1  11  -6    1.11    1.59
   1  11  -6   -0.35    1.52
  -1 -11   6    0.65    2.54
   1 -11  -6    1.00    1.77
   1  11  -6    0.81    1.70
  -1 -11   6    2.77    2.34
   1  11  -6   -1.07    3.16
  -1 -11   5   53.35    6.46
   1  11  -5   58.74    6.61
   1  11  -5   70.30    7.04
   1 -11  -5   60.33    6.69
  -1  11   5   59.57    6.34
   1  11  -5   63.88    9.47
   1 -11  -5   60.41    7.10
  -1 -11   5   61.97    7.87
   1  11  -5   60.50    6.53
  -1 -11   5   58.11    6.38
  -1  11   5   60.87    6.72
   1 -11  -4    0.33    1.52
  -1 -11   4    3.38    1.68
  -1  11   4    1.69    1.42
   1 -11  -4    0.68    1.67
   1  11  -4    2.72    1.60
   1  11  -4    0.36    1.31
  -1  11   4    2.38    1.34
   1  11  -4    0.32    1.32
   1  11  -4   -2.04    3.32
   1 -11  -4    2.12    1.55
   1 -11  -3  424.35   33.13
   1 -11  -3  382.85   32.79
   1  11  -3  403.56   32.92
   1 -11  -3  385.77   33.21
   1  11  -3  433.34   36.88
  -1 -11   3  421.31   34.47
   1  11  -3  400.29   32.86
   1  11  -3  385.84   32.90
  -1  11   3  420.07   32.74
   1 -11  -3  366.38   32.73
   1  11  -2   85.66    8.22
  -1 -11   2   89.56    9.63
   1  11  -2   82.17    8.12
   1  11  -2   92.74   11.65
   1  11  -2   81.78    8.09
   1 -11  -2   72.24    8.05
  -1  11   2   89.61    8.01
   1  11  -1    8.83    3.66
  -1  11   1   21.46    4.25
  -1 -11   1   20.11    4.07
   1  11  -1   20.80    2.98
   1 -11  -1   14.44    2.69
   1  11  -1   17.33    2.75
  -1  11   1   16.33    2.59
   1  11  -1   17.56    2.87
   1  11   0  169.74   15.44
  -1  11   0  172.35   15.19
   1  11   0  165.81   15.31
  -1  11   0  207.45   17.98
   1  11   0  179.19   15.51
  -1 -11  -1   82.04    7.36
   1  11   1   59.39    6.75
  -1  11  -1   60.26    6.49
  -1 -11  -1   81.39    8.82
   1 -11   1   68.11    7.68
   1  11   1   64.15    6.88
  -1  11  -1   77.54    9.37
   1 -11   1   78.45    7.29
  -1 -11  -2   68.52    6.97
   1 -11   2   69.93    7.28
   1  11   2   64.58    6.52
  -1  11  -2   50.99    6.20
   1 -11   2   69.12    7.94
   1 -11   2   66.77    8.67
  -1  11  -2   97.95    9.95
  -1 -11  -2   88.62    8.75
   1  11   2   68.34    6.86
   1 -11   2   60.45    6.95
   1 -11   3  139.45   14.37
  -1 -11  -3  166.12   14.32
   1 -11   3  175.46   14.81
  -1  11  -3  150.49   13.90
   1  11   3  142.00   13.83
  -1 -11  -3  174.25   15.84
  -1  11  -3  210.82   17.54
   1 -11   3  147.93   15.62
   1  11   3  167.67   14.42
   1 -11   3  173.03   16.48
   1 -11   3  176.39   14.42
   1 -11   3  141.33   14.32
   1  11   3  182.99   14.78
   1 -11   4  157.15   14.99
   1 -11   4  140.91   14.78
  -1 -11  -4  176.55   14.84
   1  11   4  189.43   15.34
   1 -11   4  174.28   15.06
   1 -11   4  182.83   14.86
  -1  11  -4  155.73   14.62
   1  11   4  150.57   14.25
  -1  11  -4  156.99   14.47
  -1 -11  -4  165.78   15.98
  -1  11  -4  176.17   17.08
   1  11   4  187.90   15.10
   1 -11   4  173.35   16.85
   1 -11   4  148.11   16.27
   1 -11   5   12.81    2.46
  -1 -11  -5   13.28    2.79
   1 -11   5   16.37    3.28
   1 -11   5   18.52    4.46
   1 -11   5   12.28    3.03
   1  11   5   16.04    3.13
   1 -11   5   12.63    2.69
  -1  11  -5    6.23    2.33
   1  11   5   12.68    2.31
  -1  11  -5   11.96    3.73
   1  11   5   15.59    3.09
   1 -11   5   14.14    4.21
   1 -11   6   22.38    4.14
  -1 -11  -6   26.14    3.92
   1 -11   6   26.61    5.66
   1 -11   6   20.17    3.85
   1 -11   6   24.30    4.09
   1  11   6   27.66    4.30
  -1  11  -6   24.48    3.89
   1 -11   6   25.35    3.90
  -1 -11  -6   20.18    3.29
   1  11   6   27.95    3.52
   1  11   6   27.89    4.12
   1 -11   6   20.46    4.88
  -1  11  -6   27.60    5.76
  -1 -11  -6   23.35    4.97
   1 -11   7   60.10    6.92
  -1 -11  -7   47.11    6.21
   1 -11   7   60.75    6.97
   1 -11   7   58.52    8.93
   1  11   7   55.84    5.92
  -1 -11  -7   54.61    6.11
   1 -11   7   42.29    7.75
  -1 -11  -7   60.31    8.47
  -1  11  -7   59.48    8.79
   1  11   7   66.75    6.96
  -1  11  -7   53.58    6.44
   1 -11   7   52.09    6.36
   1 -11   7   63.91    6.95
  -1 -11  -8  341.10   28.18
   1 -11   8  313.55   28.20
  -1  11  -8  335.05   28.21
   1 -11   8  337.99   27.98
   1 -11   8  343.27   28.31
  -1 -11  -8  317.39   27.66
   1  11   8  311.35   27.32
   1 -11   8  296.48   30.83
  -1 -11  -8  373.18   30.83
  -1  11  -8  314.21   30.74
   1 -11   8  303.29   29.23
   1  11   8  394.86   28.79
  -1 -11  -9    1.77    2.24
   1 -11   9   -1.08    2.87
   1 -11   9   -0.39    2.06
   1 -11   9   -0.48    2.46
  -1  11  -9   -0.90    1.93
   1 -11   9   -0.43    2.11
  -1 -11  -9    0.38    1.74
   1  11   9    1.22    1.25
   1  11   9   -0.94    2.03
  -1 -11  -9   -1.72    2.43
  -1  11  -9    3.99    3.11
  -1 -11 -10    2.82    2.21
   1 -11  10    1.12    3.33
  -1  11 -10   -0.47    2.14
   1 -11  10   -0.42    2.18
   1 -11  10    0.38    2.13
  -1 -11 -10    0.79    1.86
   1  11  10    0.31    1.15
   1  11  10    1.47    2.00
  -1 -11 -10   -0.90    2.53
  -1  11 -10   -1.05    2.95
  -1 -11 -11   23.62    4.30
   1 -11  11   25.00    3.91
   1 -11  11   20.48    3.88
  -1  11 -11   20.61    3.94
  -1 -11 -11   22.99    3.92
   1  11  11   20.87    3.25
   1  11  11   30.72    4.64
  -1 -11 -11   27.45    5.73
  -1  11 -11   27.06    5.95
   1 -11  11   26.55    6.40
  -1  11 -12   -0.91    2.13
   1 -11  12    0.68    1.71
   1 -11  12   -0.38    2.04
   1  11  12   -0.49    2.20
   1  11  12    1.73    1.35
  -1 -11 -12    0.40    1.95
   1 -11  13    4.90    2.06
  -1  11 -13    6.79    2.48
   1 -11  13    7.98    2.48
   1  11  13    7.33    1.83
  -1 -11 -13    8.46    2.59
   1  11  13    6.07    2.72
   1  11  14    3.71    2.39
   1 -11  14    1.68    2.65
  -1  11 -14    1.54    1.73
   1 -11  14    2.07    1.73
   1 -11  14   -0.79    1.51
  -1 -11 -14    0.36    1.77
   1  11  14   -0.22    0.58
   1  11  14    0.43    1.89
   1 -11  15   37.83    4.55
  -1 -11 -15   26.17    4.10
   1  11  15   26.35    3.62
  -1  11 -15   31.47    3.59
   1 -11  15   30.82    3.97
  -1 -11 -15   35.17    3.66
   1  11  15   28.82    3.65
   1 -11  16    0.32    2.09
  -1 -11 -16    0.39    2.28
   1  11  16   -0.31    1.67
  -1  11 -16   -0.82    1.27
   1 -11  16    0.30    1.91
  -1 -11 -16    2.64    1.83
   1  11  16    0.32    1.43
   1 -11  17   28.97    3.65
  -1 -11 -17   20.67    3.27
   1  11  17   24.98    3.22
  -1 -11 -17   32.50    3.50
  -1  11 -17   19.85    2.84
   1 -11  17   21.50    3.21
  -1  11 -17   18.95    3.13
   1  11  17   22.48    3.13
   1 -11  18   -0.17    1.16
  -1 -12  18   11.08    2.02
   1  12 -18   12.26    1.81
   1 -12 -18   13.23    2.19
  -1  12  17   27.52    3.09
   1 -12 -17   39.91    4.05
  -1 -12  17   27.79    3.20
  -1 -12  17   26.99    3.87
   1  12 -17   37.00    3.85
   1  12 -17   22.42    3.39
   1 -12 -17   41.60    4.60
  -1 -12  16   57.98    5.91
   1  12 -16   53.08    6.41
   1  12 -16   65.46    6.41
  -1  12  16   58.76    5.69
   1 -12 -16   54.39    6.20
  -1 -12  16   53.32    5.70
  -1 -12  16   52.01    6.27
   1 -12 -16   75.30    7.32
  -1 -12  15   26.07    3.81
   1  12 -15   19.41    4.13
   1  12 -15   21.57    3.89
  -1 -12  15   29.11    4.15
  -1  12  15   29.37    3.53
   1 -12 -15   20.92    3.80
  -1 -12  15   25.26    3.62
   1 -12 -15   28.23    4.90
  -1 -12  14   12.58    3.41
  -1 -12  14   12.44    3.14
   1  12 -14    8.93    3.52
   1  12 -14   16.27    3.38
   1 -12 -14   12.56    3.31
  -1  12  14   18.46    3.00
  -1 -12  14   21.64    3.44
   1 -12 -14   17.73    4.22
   1  12 -13   33.54    6.02
   1  12 -13   42.59    5.68
  -1 -12  13   37.46    5.42
  -1 -12  13   39.04    5.33
   1 -12 -13   27.78    5.26
  -1 -12  13   34.34    5.16
   1 -12 -13   47.89    5.65
  -1  12  13   46.01    5.13
   1  12 -12   40.36    6.90
   1  12 -12   52.35    6.64
  -1 -12  12   51.38    6.21
  -1  12  12   57.50    6.16
   1 -12 -12   44.87    6.26
   1 -12 -12   47.61    6.76
  -1 -12  12   46.46    6.51
  -1 -12  12   57.16    6.69
  -1 -12  11   37.76    5.45
   1 -12 -11   33.12    5.60
  -1 -12  11   39.72    7.30
   1 -12 -11   32.20    5.24
  -1  12  11   39.10    4.94
  -1 -12  11   25.73    5.44
   1  12 -11   40.09    8.02
   1  12 -11   45.49    5.86
  -1 -12  11   29.69    5.29
  -1 -12  10  176.15   16.53
   1 -12 -10  190.44   17.03
  -1 -12  10  179.84   16.67
   1  12 -10  184.03   16.85
   1 -12 -10  195.16   16.75
   1  12 -10  190.02   16.33
  -1 -12  10  154.46   18.65
  -1 -12  10  142.37   17.28
   1  12 -10  164.12   19.80
  -1 -12   9  675.72   52.87
   1 -12  -9  584.58   52.75
  -1 -12   9  658.48   52.58
   1  12  -9  692.80   52.57
   1 -12  -9  694.81   52.63
   1  12  -9  669.11   53.19
  -1 -12   9  657.86   52.43
   1 -12  -9  617.01   52.59
   1 -12  -9  616.75   53.72
  -1 -12   9  525.81   54.41
  -1 -12   9  608.55   54.09
  -1 -12   8  141.72   13.74
  -1 -12   8  134.99   13.90
   1 -12  -8  143.60   14.15
   1  12  -8  153.00   13.79
   1 -12  -8  134.80   13.60
   1  12  -8  162.47   14.54
  -1 -12   8  142.79   13.70
  -1  12   8  172.84   13.87
   1 -12  -8  149.73   13.99
  -1 -12   8  134.90   15.81
   1 -12  -8  143.21   14.84
  -1 -12   8  156.52   15.79
  -1 -12   7  141.10   14.28
   1 -12  -7  145.38   14.51
   1 -12  -7  155.49   14.31
   1  12  -7  152.93   14.23
  -1 -12   7  172.08   14.48
  -1  12   7  172.15   14.30
   1 -12  -7  158.51   14.52
   1  12  -7  162.57   14.65
  -1 -12   7  144.91   16.14
   1 -12  -7  134.78   15.04
   1  12  -7  158.54   18.21
   1  12  -7  156.65   14.24
  -1 -12   7  154.98   16.08
   1 -12  -6   10.08    2.94
   1 -12  -6    5.45    2.36
  -1 -12   6    2.90    2.01
  -1 -12   6    4.55    2.31
  -1  12   6    8.18    2.14
   1 -12  -6    8.26    2.65
   1  12  -6   10.07    2.46
  -1 -12   6    9.55    3.62
  -1 -12   6    9.07    3.44
   1  12  -6    3.55    4.03
   1  12  -6    2.96    1.70
   1 -12  -6    6.53    2.55
   1  12  -6    9.17    2.70
  -1 -12   5  191.26   18.98
   1  12  -5  218.21   19.29
  -1 -12   5  216.67   19.03
  -1  12   5  253.93   19.59
   1  12  -5  240.76   19.66
   1 -12  -5  211.26   19.29
  -1  12   5  239.37   19.17
   1  12  -5  226.37   19.24
   1 -12  -5  224.38   19.98
  -1 -12   5  214.15   21.01
   1  12  -5  201.03   22.68
  -1 -12   5  188.06   20.44
  -1 -12   4  123.46   13.07
   1 -12  -4  153.53   13.51
   1  12  -4  140.70   13.26
  -1  12   4  161.08   13.47
  -1 -12   4  135.31   12.98
   1  12  -4  154.26   13.53
  -1  12   4  165.84   13.27
   1 -12  -4  132.20   13.26
   1  12  -4  141.91   13.21
   1 -12  -4  155.51   14.11
   1  12  -4  139.79   16.91
  -1 -12   4  135.51   14.51
   1 -12  -3  416.59   33.28
   1 -12  -3  443.42   33.64
   1  12  -3  387.10   33.15
  -1  12   3  402.02   33.13
  -1 -12   3  396.82   32.89
   1  12  -3  426.48   34.55
   1 -12  -3  366.80   33.06
   1  12  -3  416.22   33.32
  -1  12   3  416.43   33.00
   1  12  -3  385.91   33.03
  -1 -12   3  407.17   34.87
   1 -12  -3  378.90   33.58
   1  12  -3  430.50   37.56
  -1 -12   3  356.34   34.07
   1 -12  -2  243.42   19.75
   1 -12  -2  235.33   19.92
   1  12  -2  211.84   19.40
   1  12  -2  236.00   20.79
  -1  12   2  220.19   19.43
  -1 -12   2  229.59   19.37
   1 -12  -2  200.89   19.37
   1  12  -2  224.09   19.54
  -1  12   2  237.01   19.34
  -1 -12   2  247.74   21.49
   1 -12  -2  224.65   19.99
   1  12  -2  248.37   23.70
  -1 -12   2  213.78   20.39
   1  12  -2  226.30   19.51
   1 -12  -1   91.33    8.01
   1 -12  -1   84.88    8.11
  -1 -12   1   92.40    8.16
   1  12  -1   67.50    7.44
  -1 -12   1   68.06    7.45
   1  12  -1   78.71    8.64
   1 -12  -1   80.14    8.11
  -1  12   1   73.37    7.47
  -1  12   1   79.16    7.39
   1 -12  -1   63.32    7.40
   1  12  -1   67.13    7.44
   1  12  -1   65.96   10.08
  -1 -12   1   64.95    8.01
  -1 -12   1   67.39    8.94
   1  12  -1   72.75    7.54
   1 -12   0  294.84   23.45
  -1 -12   0  301.42   23.49
   1 -12   0  275.31   23.15
   1  12   0  258.06   22.97
  -1  12   0  240.74   22.78
   1 -12   0  270.30   23.41
   1  12   0  275.22   23.05
  -1  12   0  258.93   22.69
  -1  12   0  287.82   25.67
  -1 -12   0  322.22   25.46
   1  12   0  271.18   23.04
  -1 -12  -1   52.58    6.17
   1 -12   1   48.32    6.28
   1 -12   1   56.34    6.05
  -1  12  -1   46.12    5.63
   1 -12   1   57.58    6.39
   1  12   1   57.44    6.02
  -1  12  -1   49.91    5.52
  -1  12  -1   47.93    7.82
  -1 -12  -1   49.64    7.34
   1  12   1   63.75    6.17
   1 -12   2   42.68    5.61
  -1 -12  -2   43.37    5.28
   1 -12   2   43.81    5.20
   1 -12   2   44.01    5.50
  -1  12  -2   39.27    4.92
   1 -12   2   39.60    6.01
   1  12   2   47.51    5.31
  -1  12  -2   38.74    4.76
  -1  12  -2   43.93    7.45
  -1 -12  -2   48.16    6.93
   1  12   2   45.27    5.31
   1 -12   3   22.05    3.40
  -1 -12  -3   21.80    3.65
   1 -12   3   24.63    4.07
   1 -12   3   21.40    4.57
   1 -12   3   22.29    3.54
   1 -12   3   17.87    3.68
  -1  12  -3   19.25    3.17
   1  12   3   22.32    3.28
  -1  12  -3   20.36    3.11
   1  12   3   20.72    3.52
   1 -12   3   25.20    5.38
  -1 -12  -3   20.23    4.51
  -1  12  -3   19.45    5.12
   1 -12   4   65.36    7.04
  -1 -12  -4   67.06    6.74
   1 -12   4   60.53    6.38
   1 -12   4   51.58    7.90
   1 -12   4   51.33    6.29
  -1  12  -4   49.71    6.14
   1 -12   4   54.75    6.68
  -1  12  -4   54.58    6.13
   1  12   4   55.77    6.01
   1 -12   4   54.33    8.18
  -1  12  -4   64.39    8.96
   1  12   4   59.07    6.54
  -1 -12  -5   17.38    3.24
   1 -12   5   15.96    3.43
   1 -12   5   13.20    2.72
   1 -12   5    9.52    3.61
   1 -12   5   20.17    3.40
  -1  12  -5   12.45    2.76
   1 -12   5    6.26    2.83
   1  12   5   15.75    2.74
   1  12   5   17.58    3.25
  -1  12  -5    8.55    3.93
   1 -12   5   12.02    3.98
   1 -12   6    3.42    1.86
  -1 -12  -6    0.77    1.85
   1 -12   6    1.28    2.35
   1 -12   6    4.74    3.34
   1  12   6    1.57    1.33
   1 -12   6    5.53    3.07
  -1  12  -6    1.97    2.78
  -1 -12  -6    6.29    3.31
   1  12   6    1.26    1.72
   1 -12   6    0.39    1.99
  -1  12  -6    3.11    1.87
   1 -12   6    0.43    2.40
   1 -12   7  123.33   13.45
  -1 -12  -7  144.63   13.52
   1 -12   7  155.47   13.94
   1 -12   7  150.35   13.94
  -1  12  -7  136.42   13.36
   1 -12   7  165.77   13.76
   1  12   7  132.20   12.79
  -1 -12  -7  127.57   12.86
  -1 -12  -7  162.36   15.98
   1 -12   7  142.26   15.32
  -1  12  -7  139.87   16.23
   1  12   7  173.87   13.99
   1 -12   7  137.33   16.16
   1 -12   8   57.74    7.33
  -1 -12  -8   65.65    7.20
   1 -12   8   51.79    7.11
   1 -12   8   54.64    9.43
  -1  12  -8   54.21    6.84
   1 -12   8   55.92    6.80
   1 -12   8   54.78    7.11
   1  12   8   63.06    6.42
  -1 -12  -8   58.91    6.57
  -1 -12  -8   63.05    8.80
  -1  12  -8   51.41    8.99
   1  12   8   72.20    7.37
   1 -12   9   51.72    7.42
   1 -12   9   63.48    7.85
  -1 -12  -9   52.71    7.17
   1 -12   9   51.13    9.39
   1 -12   9   67.59    7.57
   1 -12   9   69.63    7.36
  -1  12  -9   64.01    7.35
   1  12   9   60.73    6.55
  -1 -12  -9   72.15    7.17
  -1 -12  -9   63.33    9.23
  -1  12  -9   54.50    9.51
   1  12   9   75.06    7.75
  -1 -12 -10    6.19    2.89
   1 -12  10   10.44    3.62
  -1  12 -10   12.11    3.10
   1 -12  10   14.75    3.45
   1 -12  10    7.70    2.67
   1 -12  10    9.15    3.46
   1 -12  10   10.30    4.23
  -1 -12 -10   11.66    2.83
   1  12  10    8.86    2.18
  -1  12 -10   13.70    4.74
  -1 -12 -10   13.43    4.27
   1  12  10    7.71    2.63
  -1 -12 -11   59.28    7.54
   1 -12  11   63.91    8.07
   1  12  11   62.23    7.37
   1 -12  11   57.53    7.24
  -1  12 -11   76.40    7.78
   1 -12  11   68.09    7.19
   1  12  11   60.52    6.62
  -1 -12 -11   69.04    7.41
   1  12  11   72.91    7.88
   1 -12  12    2.92    2.82
   1  12  12    0.77    1.77
   1 -12  12    0.78    2.23
   1 -12  12    1.31    1.76
  -1  12 -12    0.86    1.90
   1  12  12    1.13    1.25
  -1 -12 -12   -0.39    1.80
   1  12  12   -0.46    1.99
   1 -12  13  126.28   11.38
   1  12  13  112.89   10.64
  -1  12 -13  119.70   10.80
   1 -12  13   89.34   10.14
   1 -12  13   88.58    9.86
   1  12  13  101.74    9.75
  -1 -12 -13  126.36   10.73
   1  12  13  138.85   11.32
   1 -12  14    3.48    2.57
   1  12  14    2.72    1.95
  -1  12 -14    6.11    2.12
   1 -12  14    0.57    1.60
   1  12  14    0.20    0.54
  -1 -12 -14    1.34    1.67
   1  12  14    4.22    2.11
   1 -12  15    5.25    2.49
  -1 -12 -15    6.69    2.58
   1  12  15    1.45    1.59
   1 -12  15    2.99    2.21
   1 -12  15   -0.40    0.80
  -1  12 -15    3.10    1.52
  -1 -12 -15    2.08    1.76
   1  12  15    4.25    2.09
   1 -12  16    7.98    2.22
   1  12  16    4.86    1.60
  -1 -12 -16    4.40    2.19
  -1  12 -16    3.44    1.40
  -1 -12 -16    4.53    1.76
   1  12  16    5.47    1.72
   1 -12  17   51.50    5.03
  -1 -12 -17   46.03    5.03
  -1  12 -17   46.46    4.94
  -1 -12 -17   60.38    5.07
   1  12  17   39.73    4.65
   1 -13 -17    5.75    1.53
   1 -13 -17    7.35    1.96
   1  13 -17    5.25    1.35
  -1 -13  17    5.20    1.63
   1 -13 -16    9.19    2.17
  -1  13  16    7.71    1.56
   1 -13 -16    8.66    2.79
  -1 -13  16    5.90    1.85
   1  13 -16    7.99    2.06
  -1 -13  16   10.01    2.37
   1  13 -16    7.41    2.16
   1 -13 -15  112.17   10.36
   1  13 -15  106.27    9.41
  -1 -13  15  105.37    9.23
   1  13 -15   84.27    9.70
  -1 -13  15   76.69    8.44
  -1 -13  15  102.67    9.35
  -1  13  15  104.33    8.89
   1 -13 -15   96.87    9.30
  -1 -13  14  123.25    7.23
   1  13 -14   98.79    8.06
   1  13 -14  111.69    7.23
  -1 -13  14  101.37    6.31
  -1 -13  14  101.56    7.06
   1 -13 -14  101.09    7.01
  -1  13  14  114.67    6.56
  -1 -13  13    0.40    2.28
  -1 -13  13    1.12    2.16
   1  13 -13    0.60    2.76
   1  13 -13    2.15    2.10
  -1  13  13    1.31    1.51
   1 -13 -13   -0.42    2.18
  -1 -13  13    0.32    1.87
   1 -13 -12   76.69    9.12
  -1  13  12   83.61    7.98
   1 -13 -12   76.53    8.38
   1 -13 -12   65.14    8.36
  -1 -13  12   73.10    8.42
  -1 -13  12   71.77    7.98
   1  13 -12   71.27    8.21
  -1 -13  12   76.03    8.12
   1 -13 -11    2.89    2.31
   1 -13 -11    2.67    2.79
  -1 -13  11   -0.41    2.35
  -1 -13  11   -0.48    2.61
   1  13 -11   -0.51    2.48
   1 -13 -10   69.07    8.21
  -1 -13  10   57.23    7.78
  -1 -13  10   65.48    7.50
  -1 -13  10   71.14    7.65
   1  13 -10   71.58    8.02
   1  13 -10   67.45    8.76
   1 -13 -10   58.09    7.54
   1  13 -10   68.87    7.30
  -1 -13  10   53.30    8.41
  -1 -13   9  223.18   20.27
  -1 -13   9  233.49   20.83
   1 -13  -9  209.20   20.77
   1 -13  -9  243.30   20.46
   1  13  -9  267.64   21.35
  -1 -13   9  228.56   20.40
   1  13  -9  246.36   20.40
   1 -13  -9  224.37   20.63
  -1 -13   9  241.00   22.55
  -1 -13   9  182.27   22.35
  -1 -13   8  118.06   12.85
   1 -13  -8  127.07   13.20
  -1 -13   8  135.33   12.90
   1  13  -8  150.42   13.56
   1  13  -8  139.77   12.78
   1 -13  -8  138.26   12.84
   1 -13  -8  130.82   12.98
  -1  13   8  131.42   12.59
  -1 -13   8  127.89   15.04
   1  13  -8  130.97   16.85
  -1 -13   8  150.91   15.16
  -1 -13   7   44.11    5.76
   1 -13  -7   34.01    5.57
   1  13  -7   55.37    6.34
  -1 -13   7   40.79    5.43
  -1 -13   7   41.75    6.96
   1  13  -7   42.43    5.39
   1 -13  -7   34.95    5.24
  -1  13   7   49.56    5.44
   1 -13  -7   39.78    5.57
   1  13  -7   38.32    5.57
   1  13  -7   24.43    6.91
   1  13  -7   35.44    5.05
  -1 -13   7   42.96    7.12
   1 -13  -6   28.70    4.83
   1 -13  -6   29.79    4.57
  -1 -13   6   28.12    4.42
  -1 -13   6   27.72    4.42
   1  13  -6   33.40    5.10
   1 -13  -6   27.00    4.42
  -1  13   6   28.67    4.07
   1  13  -6   32.77    4.42
  -1 -13   6   19.49    5.09
   1  13  -6   25.33    4.18
   1  13  -6   24.16    6.60
   1  13  -6   34.24    4.89
  -1 -13   6   36.79    6.40
  -1 -13   5  468.94   43.12
   1  13  -5  514.70   43.34
   1 -13  -5  521.97   43.47
   1 -13  -5  512.54   43.50
   1  13  -5  532.34   43.72
  -1  13   5  554.80   43.28
   1  13  -5  496.21   47.64
  -1 -13   5  560.13   45.88
   1  13  -5  583.30   43.60
  -1 -13   5  489.86   45.07
  -1 -13   5  537.57   43.32
  -1  13   5  562.52   43.62
   1 -13  -4    5.91    2.50
   1  13  -4    2.52    2.60
  -1 -13   4    2.14    1.95
  -1 -13   4    4.03    2.20
  -1  13   4    5.40    2.10
   1 -13  -4    5.03    2.25
  -1  13   4    6.02    2.10
   1  13  -4    3.09    2.04
   1  13  -4    5.13    2.40
  -1 -13   4    2.77    2.36
   1  13  -4    1.23    3.49
   1  13  -4    3.80    1.88
   1 -13  -3  386.03   30.24
   1  13  -3  338.74   29.76
   1  13  -3  361.89   30.04
   1 -13  -3  324.35   29.78
  -1  13   3  371.14   29.71
   1  13  -3  398.00   30.07
   1  13  -3  343.49   34.06
  -1 -13   3  295.91   30.66
  -1 -13   3  358.45   31.91
  -1  13   3  369.59   29.90
  -1 -13   3  328.97   29.55
   1  13  -3  409.38   31.63
   1 -13  -2   16.07    3.66
   1 -13  -2   21.32    3.61
   1 -13  -2   17.78    3.25
   1  13  -2   16.36    3.03
  -1  13   2   18.47    3.07
   1  13  -2   15.19    3.10
   1  13  -2   16.40    3.10
  -1 -13   2   25.74    4.97
   1  13  -2   20.51    5.72
  -1 -13   2   13.82    3.54
  -1  13   2   20.13    3.23
  -1 -13   2   13.74    2.92
   1  13  -2   13.45    3.63
   1 -13  -1    1.70    2.37
   1 -13  -1   -0.38    1.80
  -1 -13   1   -0.39    1.85
   1  13  -1   -1.10    1.46
   1  13  -1    1.86    1.60
  -1  13   1    0.95    1.37
  -1 -13   1    0.74    2.60
   1  13  -1    1.08    1.39
   1 -13  -1   -0.44    2.05
  -1 -13   1    2.42    1.81
   1  13  -1    3.25    2.50
  -1  13   1   -0.35    1.47
  -1 -13   0    4.38    2.42
   1 -13   0    5.42    2.47
   1 -13   0    9.33    2.58
   1  13   0    5.88    2.11
   1  13   0    6.83    2.09
  -1  13   0    9.91    2.10
   1  13   0    5.73    2.06
  -1 -13   0    9.75    3.56
   1 -13   0    6.14    2.59
  -1  13   0    6.15    1.97
  -1 -13  -1    1.22    2.06
   1 -13   1    3.70    2.42
   1 -13   1    1.09    1.69
   1 -13   1    3.94    2.37
  -1  13  -1    3.06    1.54
  -1  13  -1    0.31    1.20
   1  13   1    3.37    1.90
   1  13   1    3.97    1.80
  -1 -13  -1    2.30    2.71
  -1  13  -1    4.01    2.98
   1 -13   2   83.21    8.44
   1 -13   2   76.65    8.63
  -1 -13  -2   87.51    8.80
   1  13   2   89.14    8.70
   1 -13   2   74.96    8.66
  -1  13  -2   77.39    8.09
  -1  13  -2   78.08    7.97
  -1  13  -2   93.20   12.00
  -1 -13  -2   77.19   10.33
   1  13   2   80.72    8.40
   1 -13   3   28.14    4.73
   1 -13   3   35.45    4.62
  -1 -13  -3   33.24    4.91
  -1  13  -3   24.32    4.09
   1 -13   3   29.75    4.83
   1  13   3   40.43    4.91
   1  13   3   36.05    4.37
  -1  13  -3   33.40    4.34
  -1 -13  -3   31.83    6.19
   1  13   3   36.36    4.74
  -1  13  -3   32.91    6.92
   1 -13   4   14.83    3.52
   1 -13   4   25.02    3.62
  -1 -13  -4   25.36    3.92
   1 -13   4   19.37    4.59
   1 -13   4   18.27    3.77
   1 -13   4   17.83    3.50
  -1  13  -4   16.78    3.15
  -1  13  -4   15.05    2.94
   1  13   4   18.14    3.08
   1  13   4   19.43    3.43
  -1  13  -4   15.50    5.19
   1 -13   5   34.13    5.29
  -1 -13  -5   44.58    5.49
   1 -13   5   43.91    5.22
   1 -13   5   48.20    7.55
   1 -13   5   35.42    5.56
   1 -13   5   46.54    5.65
  -1  13  -5   41.11    5.11
   1  13   5   43.28    4.89
   1  13   5   32.79    5.02
  -1  13  -5   40.27    7.83
  -1 -13  -5   27.36    6.16
  -1 -13  -6    7.57    2.80
   1 -13   6    7.43    2.25
   1 -13   6    7.00    3.02
   1 -13   6    3.98    3.29
   1 -13   6    9.57    2.80
   1 -13   6    4.10    2.63
  -1  13  -6    9.57    2.38
   1  13   6    7.88    2.02
  -1  13  -6    5.72    3.45
  -1 -13  -6    8.45    3.68
   1  13   6    9.72    2.58
  -1 -13  -7    3.01    2.07
   1 -13   7    2.29    2.48
   1 -13   7    3.19    3.00
   1  13   7    4.10    1.85
   1  13   7    0.87    1.97
  -1  13  -7    1.17    3.49
  -1 -13  -7    5.19    3.15
   1 -13   7    0.50    2.70
   1 -13   7    5.10    2.62
   1 -13   7    1.89    2.51
  -1  13  -7   -0.42    1.72
  -1 -13  -8   94.25   10.37
   1 -13   8   86.85   10.50
   1 -13   8   98.04   10.66
   1  13   8  106.26    9.92
  -1 -13  -8  101.43   10.03
   1 -13   8   99.61   13.35
   1  13   8  109.20   10.58
  -1 -13  -8  103.07   12.53
  -1  13  -8   93.85   13.46
   1 -13   8  119.04   10.66
  -1  13  -8  119.18   10.66
   1 -13   8   94.62   10.62
   1 -13   9  727.96   62.59
   1 -13   9  855.05   63.00
  -1 -13  -9  767.23   62.48
   1  13   9  728.58   61.62
  -1 -13  -9  744.86   61.97
  -1 -13  -9  858.39   65.63
   1 -13   9  641.97   65.28
  -1  13  -9  707.31   66.25
   1  13   9  899.36   62.86
   1 -13   9  751.18   62.11
   1 -13   9  794.23   62.66
  -1  13  -9  753.40   62.39
  -1 -13 -10   -0.47    2.24
   1 -13  10    1.51    2.87
   1 -13  10    1.84    2.40
   1 -13  10    0.38    1.93
  -1  13 -10   -1.34    2.13
   1 -13  10   -1.01    3.03
  -1 -13 -10   -0.40    1.84
   1  13  10    1.28    1.47
   1  13  10    1.82    2.05
   1 -13  11    1.93    2.97
  -1 -13 -11   -0.44    2.09
   1  13  11    0.43    2.01
  -1 -13 -11    0.40    1.90
   1  13  11    0.30    1.29
   1  13  11    3.11    2.05
   1 -13  11   -1.73    1.89
   1 -13  11    2.13    2.37
   1 -13  11   -2.42    2.95
  -1  13 -11    2.55    2.00
  -1 -13 -12   35.03    4.73
   1 -13  12   28.62    4.94
   1 -13  12   28.77    4.56
   1 -13  12   29.40    4.17
   1 -13  12   29.70    5.08
  -1  13 -12   32.64    4.57
  -1 -13 -12   34.47    4.60
   1  13  12   26.20    3.73
   1  13  12   46.39    5.17
   1 -13  13   47.78    5.16
  -1  13 -13   40.64    4.37
   1 -13  13   39.00    4.32
   1  13  13   39.38    3.63
  -1 -13 -13   47.01    4.63
   1  13  13   48.61    4.87
   1 -13  14   -0.65    2.14
   1  13  14    0.24    0.72
  -1  13 -14   -0.28    1.35
   1 -13  14   -0.26    1.56
  -1 -13 -14   -0.60    1.71
   1  13  14    1.30    1.46
   1 -13  15    6.90    2.29
  -1 -13 -15    3.74    2.29
  -1  13 -15    3.96    1.51
  -1 -13 -15    6.52    1.83
   1  13  15    7.11    1.85
   1 -13  16   11.35    2.18
  -1 -13 -16   13.94    2.61
  -1 -13 -16   11.91    2.01
  -1  13 -16   13.34    2.53
  -1  13 -16    9.77    1.61
   1  13  16    9.94    1.83
   1 -13  17   31.22    3.22
   1 -14 -16    6.86    1.67
   1  14 -16    2.84    1.51
  -1 -14  16    4.93    1.44
   1  14 -16    7.68    1.57
   1 -14 -16    4.94    1.97
   1 -14 -15   12.35    2.35
  -1  14  15   15.08    2.09
  -1 -14  15    6.03    2.05
  -1 -14  15   11.05    2.37
   1  14 -15   10.88    2.19
   1  14 -15   10.13    2.70
  -1  14  14    4.78    1.61
   1 -14 -14    3.51    2.01
  -1 -14  14    3.69    2.01
   1  14 -14    5.61    2.96
   1  14 -14    3.45    1.91
  -1 -14  14    2.97    2.05
  -1 -14  13   13.26    3.16
  -1 -14  13   14.87    3.20
   1  14 -13   12.99    3.00
  -1  14  13   14.45    2.65
   1 -14 -13   11.18    3.01
  -1 -14  13   10.94    2.25
   1 -14 -13   12.31    3.48
   1  14 -12    1.27    1.94
  -1 -14  12   -1.23    2.35
  -1  14  12   -0.67    1.60
   1 -14 -12   -2.10    2.16
  -1 -14  12   -1.12    1.46
   1 -14 -12   -1.37    2.35
   1 -14 -12   -0.57    2.75
  -1 -14  11    9.58    3.18
   1  14 -11   12.53    3.38
   1  14 -11   15.39    4.28
   1 -14 -11   16.43    3.59
   1 -14 -11    8.59    3.23
   1 -14 -11   16.65    4.14
   1  14 -10  114.08   11.24
   1  14 -10  121.86   12.50
  -1 -14  10  113.45   10.95
   1 -14 -10   99.05   10.91
   1  14 -10  101.50   10.43
  -1 -14  10  104.37   11.26
   1 -14 -10  115.51   11.54
  -1 -14   9    1.33    2.25
  -1 -14   9   -0.49    2.58
   1  14  -9   -2.83    3.39
   1  14  -9    0.51    2.21
   1 -14  -9   -1.27    2.22
   1 -14  -9   -0.96    2.30
  -1  14   9   -0.79    1.78
   1  14  -9    1.18    1.61
   1 -14  -9    0.54    2.62
   1 -14  -8   36.12    5.46
  -1 -14   8   41.75    5.44
   1  14  -8   28.29    5.68
  -1 -14   8   26.07    5.10
   1  14  -8   30.57    5.11
  -1 -14   8   28.19    6.09
   1 -14  -8   35.55    5.03
   1  14  -8   41.14    5.00
   1 -14  -8   34.57    5.13
  -1  14   8   35.38    4.75
   1  14  -8   17.29    6.16
  -1 -14   8   37.95    6.64
  -1 -14   7   57.68    7.81
   1 -14  -7   80.26    8.80
  -1 -14   7   79.12    8.23
   1  14  -7   75.58    9.41
   1  14  -7   87.67    8.71
   1 -14  -7   72.77    8.12
   1  14  -7   81.80    8.03
   1 -14  -7   64.82    7.94
  -1  14   7   73.78    7.82
   1  14  -7   72.82    8.16
  -1 -14   7   69.00    9.87
  -1 -14   7   59.70    9.70
   1  14  -7   55.91   10.54
   1  14  -6    1.38    2.82
  -1 -14   6    3.27    2.17
  -1 -14   6    3.41    2.27
   1  14  -6    1.03    1.99
  -1 -14   6    2.54    2.64
   1 -14  -6    2.61    2.24
  -1  14   6    0.39    1.51
   1 -14  -6   -0.45    2.17
  -1  14   6    0.68    1.32
   1  14  -6   -1.21    2.18
  -1 -14   6    1.76    2.75
   1  14  -6    2.40    1.80
   1  14  -6    0.93    1.85
   1  14  -6    1.33    3.54
   1  14  -5   -0.68    2.70
  -1 -14   5    3.66    2.26
  -1  14   5    2.46    1.96
   1  14  -5    2.04    2.14
  -1 -14   5    0.79    2.34
   1 -14  -5    2.66    2.32
   1 -14  -5    1.78    2.09
  -1  14   5    0.77    1.70
   1  14  -5   -0.81    1.75
   1  14  -5   -0.46    1.84
  -1 -14   5   -0.87    2.71
   1  14  -5   -0.40    1.46
   1  14  -5    1.32    3.03
   1 -14  -4   24.25    4.27
  -1 -14   4   17.59    3.52
  -1 -14   4   14.51    3.30
  -1  14   4   17.34    3.40
   1  14  -4   15.61    3.78
   1  14  -4   20.56    4.54
  -1 -14   4   15.89    4.25
   1  14  -4   13.19    3.19
   1 -14  -4   21.41    3.80
   1  14  -4   21.08    3.60
  -1  14   4   18.12    3.22
   1  14  -4   22.46    3.59
   1  14  -4   14.24    5.62
   1 -14  -3   41.99    5.95
   1  14  -3   49.51    5.73
  -1  14   3   50.94    5.57
   1  14  -3   51.09    5.90
   1 -14  -3   35.24    5.40
   1  14  -3   53.87    5.91
   1  14  -3   45.42    8.82
  -1 -14   3   32.52    6.62
  -1  14   3   44.48    5.64
  -1 -14   3   37.23    5.53
   1  14  -3   41.62    5.94
   1  14  -3   48.87    6.87
   1 -14  -2   25.81    4.81
   1 -14  -2   24.94    4.30
   1  14  -2   17.70    3.69
   1  14  -2   23.58    3.92
  -1  14   2   24.09    3.66
   1  14  -2   23.42    3.92
  -1 -14   2   22.22    5.33
  -1  14   2   24.58    3.83
  -1 -14   2   23.36    3.93
   1  14  -2   25.00    4.83
  -1 -14   1    0.42    1.95
   1 -14  -1   -0.85    1.99
   1 -14  -1   -2.40    3.64
  -1 -14   1   -1.16    2.18
  -1  14   1    0.38    1.80
   1  14  -1    0.42    1.85
  -1  14   1   -0.36    1.62
   1  14  -1    1.22    1.67
   1  14  -1   -1.19    2.00
  -1 -14   1    0.82    2.99
  -1 -14   0   33.36    4.97
   1 -14   0   42.50    5.16
   1 -14   0   26.64    5.00
   1  14   0   36.24    4.84
  -1  14   0   26.44    4.32
   1 -14   0   29.64    4.99
   1  14   0   34.29    4.71
  -1  14   0   30.75    4.29
   1  14   0   34.53    4.67
  -1 -14   0   33.53    6.46
   1 -14   1  104.65   10.57
  -1 -14  -1  121.57   11.18
   1 -14   1  108.88   11.12
   1  14   1  111.03   10.69
   1 -14   1  108.72   11.13
  -1  14  -1   92.89   10.17
  -1  14  -1   95.67   10.16
   1  14   1  121.22   10.71
   1  14   1  112.97   10.61
  -1 -14  -1   98.82   12.64
  -1 -14  -2  273.68   20.96
   1 -14   2  247.75   20.27
   1 -14   2  215.36   20.26
   1  14   2  230.04   20.34
  -1  14  -2  206.70   19.78
   1 -14   2  222.82   20.53
  -1  14  -2  214.64   19.80
   1  14   2  246.79   20.31
  -1  14  -2  212.80   23.80
  -1 -14  -2  242.40   22.88
   1 -14   3  218.80   17.69
   1 -14   3  212.95   17.87
  -1 -14  -3  212.54   18.06
   1  14   3  224.53   18.04
  -1  14  -3  168.58   17.02
  -1  14  -3  209.44   22.03
   1  14   3  199.48   17.51
   1 -14   3  189.88   17.91
  -1  14  -3  164.05   17.01
   1 -14   4   14.83    3.74
   1 -14   4   32.51    4.20
  -1 -14  -4   20.09    3.94
   1  14   4   15.90    3.19
  -1  14  -4   25.91    3.78
   1  14   4   29.93    4.18
   1  14   4   19.36    3.57
  -1  14  -4   20.11    6.22
  -1  14  -4   13.00    3.11
   1 -14   4   20.77    4.26
  -1 -14  -5   14.53    3.47
   1 -14   5   14.09    3.48
   1 -14   5   19.77    3.34
   1 -14   5   10.65    3.42
  -1  14  -5   11.74    2.94
   1  14   5   19.60    3.66
   1  14   5   18.32    3.22
   1  14   5   18.78    3.39
  -1  14  -5   12.67    4.91
  -1 -14  -5   15.14    4.44
  -1 -14  -6    0.45    2.29
   1 -14   6    7.87    2.91
   1 -14   6    4.27    2.07
   1 -14   6    4.03    3.28
  -1  14  -6    0.81    1.66
   1  14   6    4.76    1.99
  -1  14  -6   -2.56    3.81
  -1 -14  -6    1.79    2.39
   1  14   6    3.31    1.91
   1 -14   7    1.81    2.42
  -1 -14  -7   -0.45    2.34
   1 -14   7    3.28    1.93
   1 -14   7    2.14    3.03
   1  14   7    3.23    1.92
  -1  14  -7    2.60    3.67
  -1 -14  -7    4.50    2.94
   1  14   7    6.27    2.23
   1 -14   7    5.30    2.76
  -1  14  -7    0.83    1.71
   1 -14   8   88.82   10.32
  -1 -14  -8  108.28   10.61
   1  14   8   99.97    9.73
  -1 -14  -8  105.02   12.58
   1  14   8  111.56   10.36
  -1  14  -8  104.77   14.44
  -1  14  -8   88.45    9.95
   1 -14   8  105.23   10.38
   1 -14   8  105.10   10.96
  -1 -14  -9   36.45    5.70
   1 -14   9   38.80    6.05
   1  14   9   46.38    5.22
  -1 -14  -9   47.82    5.54
   1  14   9   50.05    5.78
   1 -14   9   38.43    5.87
  -1  14  -9   41.89    5.51
  -1 -14 -10   68.00    7.81
   1 -14  10   48.97    7.52
   1 -14  10   60.39    7.80
  -1  14 -10   70.06    7.47
   1 -14  10   58.76    7.51
   1  14  10   64.66    6.76
  -1 -14 -10   72.92    7.43
   1  14  10   82.36    7.77
  -1 -14 -11   -1.23    2.07
   1 -14  11   -0.43    2.78
   1  14  11   -0.79    1.88
  -1 -14 -11   -0.37    1.78
   1  14  11    0.29    1.30
   1  14  11    0.78    1.60
  -1  14 -11    0.38    1.73
   1 -14  11   -0.42    2.21
  -1 -14 -12   -0.66    1.79
   1 -14  12   -2.64    2.60
   1  14  12    1.78    1.46
  -1 -14 -12    0.68    1.82
   1  14  12   -0.36    1.54
   1 -14  12   -1.46    2.23
  -1  14 -12   -1.00    1.56
   1 -14  13    7.96    2.69
   1 -14  13    8.55    2.45
  -1  14 -13    9.73    2.12
   1  14  13    4.63    1.36
  -1 -14 -13   11.90    2.54
   1  14  13   10.85    2.33
   1 -14  14    0.78    1.74
  -1 -14 -14   -0.40    2.09
   1 -14  14   -0.91    1.40
  -1  14 -14   -0.22    1.09
  -1 -14 -14    0.49    1.26
   1  14  14    0.25    1.17
   1 -14  15    1.81    1.51
  -1 -14 -15    0.97    1.75
  -1  14 -15    1.04    2.00
  -1  14 -15    1.53    0.86
  -1 -14 -15    1.47    1.08
   1  14  15    2.64    1.25
   1  14  15    1.87    1.00
  -1 -14 -16    3.28    1.41
  -1  14 -16    3.25    1.36
   1 -14  16    1.78    1.08
   1 -14  16   -0.39    1.18
   1  15 -16    2.91    0.84
   1 -15 -15   15.03    2.27
  -1  15  15   14.38    2.00
   1 -15 -15   19.22    3.15
   1  15 -15   14.35    2.59
  -1 -15  15   17.78    2.57
   1  15 -15   12.18    2.13
  -1  15  14   59.61    5.43
   1 -15 -14   45.33    5.43
   1 -15 -14   56.37    6.46
  -1 -15  14   55.87    5.82
   1  15 -14   49.93    6.22
   1  15 -14   50.38    5.45
  -1  15  13   23.66    2.38
   1 -15 -13   30.75    4.40
  -1 -15  13   23.19    3.23
   1  15 -13   28.79    3.38
  -1  15  13   31.12    3.02
   1 -15 -13   25.97    3.20
  -1  15  12   49.47    5.69
   1 -15 -12   72.37    7.71
   1  15 -12   67.58    7.78
   1  15 -12   68.31    6.63
  -1  15  12   55.31    6.03
   1 -15 -12   52.39    6.37
  -1 -15  12   54.68    5.81
  -1 -15  12   49.38    6.33
   1 -15 -12   57.69    6.78
   1 -15 -11   17.97    4.07
  -1 -15  11   19.17    3.80
  -1 -15  11   12.71    3.19
   1  15 -11   16.31    3.34
   1  15 -11   14.89    4.36
   1 -15 -11   15.55    3.40
  -1  15  11   18.28    2.85
   1 -15 -11   18.26    3.90
  -1 -15  11   16.12    2.97
   1 -15 -10   14.04    3.82
  -1 -15  10   11.61    3.27
   1  15 -10    7.25    3.87
   1  15 -10    6.25    2.85
  -1 -15  10    5.24    2.67
  -1 -15  10    6.65    2.42
   1 -15 -10    9.69    3.48
   1 -15 -10   11.35    3.05
  -1  15  10    6.64    1.90
  -1 -15   9   10.10    3.20
  -1 -15   9    5.84    2.99
   1  15  -9   11.60    4.10
   1  15  -9   12.81    3.18
   1 -15  -9    8.51    2.86
   1  15  -9    5.86    2.09
  -1  15   9    6.47    2.14
  -1  15   9    7.83    2.11
   1 -15  -9    4.80    3.03
  -1 -15   9    9.28    2.70
  -1  15   8  185.19   18.77
   1  15  -8  221.18   19.39
   1 -15  -8  237.50   19.74
  -1 -15   8  204.00   19.60
   1  15  -8  233.24   20.12
   1  15  -8  248.06   21.46
   1 -15  -8  204.73   19.56
  -1  15   8  240.55   19.64
  -1 -15   8  254.88   19.87
   1 -15  -8  225.22   20.33
   1 -15  -7    0.87    1.93
   1  15  -7    1.39    2.92
  -1 -15   7    6.37    2.90
   1  15  -7    5.04    2.47
   1 -15  -7    0.44    2.13
  -1  15   7    4.34    2.07
   1  15  -7    3.53    1.96
   1 -15  -7    1.07    2.85
  -1 -15   7    2.08    2.22
  -1 -15   6    1.26    2.27
   1 -15  -6   -0.45    2.22
  -1 -15   6   -3.12    2.33
   1  15  -6   -0.69    2.90
   1  15  -6   -1.02    2.50
   1 -15  -6   -0.44    2.01
  -1  15   6    1.59    2.04
   1  15  -6   -0.40    1.81
  -1 -15   6    0.93    2.62
   1  15  -6    1.57    1.84
   1  15  -6    2.67    3.07
   1  15  -6    3.19    2.22
  -1 -15   5    6.74    2.75
   1 -15  -5   11.46    3.26
  -1 -15   5    6.05    2.97
   1  15  -5   10.86    2.83
  -1  15   5    6.99    2.34
   1  15  -5    8.17    3.59
   1 -15  -5    0.43    2.05
  -1  15   5    7.13    2.34
   1  15  -5    4.92    2.30
  -1 -15   5    4.65    3.30
   1  15  -5    8.78    2.48
   1  15  -5    6.66    3.78
   1  15  -5    5.13    2.37
   1 -15  -4   21.79    4.36
  -1 -15   4   24.86    4.20
   1 -15  -4   19.90    4.16
   1  15  -4   22.65    4.21
   1  15  -4   26.37    4.25
  -1  15   4   30.60    4.15
   1 -15  -4   20.60    3.93
   1  15  -4   18.44    6.34
   1  15  -4   33.17    4.34
  -1 -15   4   24.28    4.07
  -1  15   4   18.95    3.69
   1  15  -4   27.70    4.50
   1  15  -4   18.67    4.55
   1 -15  -3    1.44    2.30
   1  15  -3    0.94    2.08
  -1  15   3    0.40    1.63
   1  15  -3    1.70    1.88
  -1 -15   3   -2.70    3.05
   1  15  -3    0.82    1.68
  -1 -15   3    1.24    2.29
  -1  15   3    2.89    1.86
   1  15  -3    0.53    2.10
   1  15  -3    1.93    2.63
   1 -15  -2    3.25    2.35
  -1 -15   2   -0.41    2.02
  -1  15   2   -0.41    1.73
   1  15  -2   -4.24    2.22
   1  15  -2    0.60    2.59
  -1  15   2    0.40    1.63
   1  15  -2    1.30    1.87
   1  15  -2    1.87    2.01
  -1 -15   2    1.79    2.78
   1  15  -2    0.82    1.73
  -1 -15   1  220.86   18.43
   1 -15  -1  181.09   17.98
   1 -15  -1  231.31   19.00
   1  15  -1  203.56   18.14
  -1  15   1  196.34   17.77
   1  15  -1  214.70   18.32
   1  15  -1  230.54   18.26
  -1 -15   1  181.08   20.21
  -1  15   1  177.24   17.69
  -1 -15   1  168.25   17.71
   1  15  -1  227.76   18.90
   1 -15   0    4.41    2.38
   1 -15   0    9.03    3.36
  -1 -15   0    5.63    2.85
  -1  15   0    4.35    2.11
   1  15   0    3.14    2.30
   1  15   0    5.42    2.54
  -1 -15   0    4.56    3.55
   1  15   0    8.22    2.50
  -1  15   0    4.45    2.25
   1  15   0    4.21    2.45
   1 -15   1   -1.72    2.35
  -1 -15  -1    0.49    2.66
   1 -15   1   -1.92    2.78
   1 -15   1    4.63    3.24
  -1  15  -1   -0.40    2.03
   1  15   1    0.91    1.85
  -1  15  -1    1.19    1.78
   1  15   1    0.44    1.86
  -1 -15  -1    1.87    3.28
   1  15   1   -0.41    1.79
   1 -15   2   34.39    5.63
   1 -15   2   43.61    5.67
  -1 -15  -2   55.50    6.56
   1  15   2   47.35    5.90
  -1  15  -2   36.87    5.11
   1 -15   2   36.77    6.01
  -1  15  -2   37.57    5.28
   1  15   2   45.29    5.60
   1 -15   3   93.53   10.47
  -1 -15  -3  128.13   11.44
   1 -15   3  105.95   10.47
   1  15   3  108.47   10.63
  -1  15  -3  116.47   10.52
   1  15   3  105.37   10.33
   1 -15   3   83.46   10.55
  -1  15  -3   95.70   10.08
  -1 -15  -4   -0.49    2.32
   1 -15   4   -1.20    2.02
   1 -15   4    0.86    2.49
   1  15   4   -0.45    1.76
   1  15   4   -2.46    1.96
  -1  15  -4    0.39    1.62
  -1  15  -4    4.02    3.78
   1  15   4    0.79    1.66
  -1 -15  -4    0.93    2.76
   1 -15   4    1.04    2.58
  -1  15  -4   -0.39    1.65
  -1 -15  -5   29.51    4.74
   1 -15   5   21.37    4.05
   1 -15   5   20.67    3.74
   1  15   5   24.22    3.82
   1  15   5   27.43    4.35
   1  15   5   23.46    3.88
  -1  15  -5   13.52    5.52
  -1 -15  -5   16.67    5.07
   1 -15   5   22.19    4.50
  -1  15  -5   21.36    3.70
  -1 -15  -6   -4.76    2.57
   1 -15   6    0.71    1.89
   1 -15   6   -0.43    2.49
   1  15   6    1.78    1.77
   1  15   6    0.38    1.65
   1  15   6   -0.39    1.55
  -1  15  -6    1.36    3.38
  -1 -15  -6    0.92    2.12
   1 -15   6    0.53    2.84
  -1  15  -6   -2.00    2.02
   1 -15   7   -0.44    2.53
  -1 -15  -7   -1.41    2.42
   1 -15   7    0.32    1.60
  -1  15  -7   -0.40    1.56
   1  15   7    1.84    1.62
   1  15   7   -0.88    2.10
   1  15   7   -1.16    1.66
  -1 -15  -8   76.88    9.14
   1 -15   8   89.28    9.48
   1  15   8   81.75    9.09
  -1  15  -8   83.44    8.92
   1  15   8   87.73    8.67
   1  15   8  101.63    9.11
   1 -15   9  134.58   13.32
  -1 -15  -9  131.59   13.35
   1  15   9  152.44   13.39
   1  15   9  136.86   12.63
   1  15   9  149.52   13.08
  -1  15  -9  135.44   12.97
   1 -15   9  136.58   13.52
  -1 -15 -10   48.08    6.10
   1 -15  10   45.80    6.07
  -1  15 -10   47.48    5.62
   1 -15  10   44.05    6.08
   1  15  10   47.98    5.29
   1  15  10   44.50    5.50
   1 -15  11    7.96    2.84
  -1 -15 -11    9.49    2.67
   1  15  11    8.87    2.49
   1  15  11    9.42    2.08
   1  15  11   11.67    2.42
   1 -15  11    8.97    2.96
  -1  15 -11    9.59    2.31
   1 -15  12   25.16    3.82
   1  15  12   24.08    3.10
   1  15  12   22.29    3.54
   1  15  12   26.94    3.40
  -1  15 -12   18.91    3.11
   1 -15  12   18.02    3.53
   1 -15  13    4.73    1.96
   1 -15  13    4.00    1.89
  -1  15 -13    3.00    1.29
   1  15  13    3.03    1.64
   1  15  13   -0.35    0.55
   1  15  13    4.64    1.46
  -1 -15 -14   -0.70    2.01
  -1  15 -14    0.15    0.78
   1  15  14    0.22    1.13
   1 -15  14   -0.19    1.31
  -1 -15 -15    6.42    1.98
  -1  15 -15    4.26    1.76
   1 -15  15    1.27    1.12
   1 -15  15    6.25    1.36
   1  16 -15   -0.25    0.61
  -1  16  14   55.87    4.66
   1 -16 -14   40.57    5.09
  -1 -16  14   47.55    4.85
   1  16 -14   37.30    4.47
  -1  16  13    0.44    1.06
   1 -16 -13    1.64    1.45
   1 -16 -13    0.74    1.94
   1  16 -13    0.72    1.28
   1  16 -13    0.80    2.01
   1 -16 -12   54.36    5.67
   1  16 -12   53.26    4.85
   1  16 -12   45.94    5.73
  -1  16  12   65.99    4.87
   1 -16 -12   53.80    4.91
   1 -16 -12   51.21    5.18
   1 -16 -11    8.37    2.86
   1  16 -11    4.34    2.91
   1  16 -11    8.27    2.21
  -1 -16  11    5.59    2.46
   1 -16 -11    4.42    2.15
   1 -16 -11    2.10    2.40
  -1 -16  11    3.66    1.60
   1 -16 -10   16.26    3.61
  -1 -16  10    9.28    3.17
   1  16 -10   17.13    3.37
   1  16 -10   19.49    4.37
   1 -16 -10   13.05    2.93
   1 -16 -10   14.29    3.80
  -1 -16  10   13.77    2.78
   1 -16  -9    6.63    2.85
   1  16  -9    9.35    3.67
   1  16  -9    3.83    2.22
  -1 -16   9    4.20    2.58
   1 -16  -9    5.07    2.16
  -1  16   9    7.48    2.09
   1  16  -9    1.64    1.64
   1 -16  -9    2.06    2.80
  -1 -16   9    3.72    1.98
   1 -16  -8    2.02    2.35
  -1 -16   8    2.22    2.54
   1  16  -8    5.00    2.57
   1  16  -8    1.93    3.03
   1 -16  -8    4.75    2.21
  -1  16   8    1.12    1.73
   1  16  -8    2.47    1.76
   1 -16  -8    2.66    3.09
  -1 -16   8    1.13    1.88
   1 -16  -7   -1.69    2.31
  -1 -16   7    1.36    2.56
   1  16  -7    0.48    2.24
   1  16  -7    2.61    3.25
   1  16  -7    1.11    1.60
   1 -16  -7    0.39    1.85
  -1  16   7    0.38    1.61
  -1 -16   7    6.05    2.51
   1 -16  -7    1.08    2.86
  -1 -16   6    0.42    2.12
   1 -16  -6   -0.87    2.13
   1  16  -6   -0.49    2.13
  -1 -16   6    0.45    2.48
   1  16  -6    0.65    2.94
   1  16  -6   -0.39    1.78
   1 -16  -6   -0.39    1.88
  -1  16   6   -0.39    1.76
   1  16  -6   -1.30    2.00
  -1 -16   5   68.81    8.08
   1  16  -5   75.59    7.98
   1 -16  -5   67.33    8.09
  -1 -16   5   61.51    7.96
   1  16  -5   87.26    9.54
   1  16  -5   77.72    8.52
  -1  16   5   76.57    7.90
   1  16  -5   69.02    8.13
   1  16  -5   80.03    7.85
  -1 -16   4    9.06    3.05
   1 -16  -4   10.68    3.33
   1 -16  -4   11.24    3.30
  -1 -16   4   11.70    3.27
  -1  16   4   10.15    2.70
   1  16  -4    8.44    3.11
   1  16  -4    8.19    3.44
   1  16  -4    7.50    2.59
  -1  16   4   12.55    2.82
   1  16  -4   11.39    2.54
   1  16  -4    8.54    3.09
  -1 -16   3   42.04    5.91
   1 -16  -3   45.35    6.26
   1  16  -3   49.22    5.87
  -1  16   3   43.37    5.57
   1  16  -3   41.25    5.79
  -1 -16   3   44.55    7.58
   1  16  -3   49.01    5.70
  -1  16   3   48.61    5.82
  -1 -16   3   38.08    5.69
   1  16  -3   42.88    6.19
   1  16  -3   35.50    6.14
   1 -16  -2    4.77    2.62
  -1  16   2    2.10    1.82
   1  16  -2    2.45    2.40
   1  16  -2    1.34    2.06
  -1 -16   2    5.64    3.42
   1  16  -2    1.58    1.75
  -1  16   2    2.91    1.96
  -1 -16   2    2.99    2.52
   1  16  -2    5.55    2.87
   1 -16  -1    0.46    2.34
  -1  16   1   -1.28    1.88
   1  16  -1   -0.49    2.00
   1  16  -1    0.46    1.82
  -1 -16   1    0.94    3.19
   1  16  -1    0.40    1.63
  -1  16   1   -1.25    2.15
   1  16  -1    1.13    2.80
  -1 -16   1    1.72    2.42
  -1 -16   0   13.95    3.66
   1 -16   0    8.10    3.98
   1 -16   0   17.61    3.52
   1  16   0   17.51    4.08
  -1  16   0    8.31    2.67
   1  16   0   13.04    3.28
  -1  16   0   13.75    3.11
   1  16   0   10.69    3.11
  -1 -16   0   13.36    4.75
   1  16   0   11.11    2.85
  -1 -16  -1  114.64   11.47
   1 -16   1  109.31   11.49
   1 -16   1   97.95   10.88
   1  16   1  123.43   11.32
   1  16   1  110.13   11.61
  -1  16  -1  109.71   10.77
  -1  16  -1   94.26   10.69
   1  16   1  125.75   11.42
   1  16   1  111.33   10.85
   1 -16   2  163.94   16.18
  -1 -16  -2  194.53   16.77
   1 -16   2  185.16   16.17
   1  16   2  200.44   16.55
   1 -16   2  156.74   16.34
  -1  16  -2  150.72   15.56
   1  16   2  196.12   17.03
  -1  16  -2  164.88   15.86
   1  16   2  177.40   15.83
  -1 -16  -3   40.41    6.09
   1 -16   3   41.67    5.79
   1 -16   3   44.58    5.70
   1  16   3   60.61    6.24
  -1  16  -3   37.94    5.23
   1 -16   3   34.23    5.80
  -1  16  -3   34.46    5.25
  -1 -16  -3   39.61    7.18
   1  16   3   44.04    5.47
  -1 -16  -4   66.10    7.31
   1 -16   4   46.04    6.10
   1 -16   4   52.80    6.59
   1  16   4   64.76    6.76
  -1  16  -4   46.88    5.98
   1  16   4   44.40    5.85
   1 -16   4   49.64    6.77
  -1  16  -4   46.58    5.95
  -1 -16  -5   25.49    4.54
   1 -16   5   24.73    3.84
   1 -16   5   17.27    3.95
   1  16   5   20.40    3.54
   1  16   5   21.87    3.75
   1  16   5   18.22    3.20
   1 -16   5   13.19    4.03
  -1  16  -5   16.43    3.28
   1 -16   6    3.76    2.65
   1 -16   6    1.68    1.82
  -1 -16  -6    7.81    2.81
   1 -16   6    4.75    3.27
  -1  16  -6    5.81    2.29
   1  16   6    3.11    1.78
   1  16   6    4.26    2.21
   1  16   6    5.92    1.99
   1 -16   7   42.24    6.14
  -1 -16  -7   52.13    6.67
   1  16   7   60.14    6.37
   1 -16   7   43.43    6.63
  -1  16  -7   52.83    6.02
   1  16   7   49.02    5.78
   1  16   7   48.68    5.68
   1 -16   8   39.62    5.56
  -1 -16  -8   42.67    5.88
   1  16   8   43.16    5.40
  -1  16  -8   36.26    5.03
   1  16   8   40.18    4.94
   1  16   8   42.95    4.99
   1 -16   9   64.50    6.97
  -1 -16  -9   59.61    6.98
   1  16   9   65.24    6.72
  -1  16  -9   48.54    6.12
   1 -16   9   53.40    6.97
   1  16   9   59.51    6.18
   1  16   9   52.08    5.98
  -1 -16 -10    0.77    2.01
   1 -16  10    3.43    2.26
   1  16  10   -0.72    2.01
  -1  16 -10    0.31    1.41
   1 -16  10   -0.40    2.46
   1  16  10    0.56    1.26
   1  16  10    0.35    1.66
   1  16  10    1.13    1.40
  -1 -16 -11   73.13    7.86
   1 -16  11   79.12    7.94
   1  16  11   87.01    8.03
   1  16  11   68.50    7.53
   1  16  11   82.67    7.52
   1  16  11   84.94    7.61
  -1  16 -11   80.52    7.64
   1 -16  11   74.55    8.11
   1 -16  12    2.14    1.65
   1 -16  12    0.56    1.54
  -1  16 -12    4.13    2.49
  -1  16 -12    3.49    1.27
   1  16  12    2.94    1.44
   1  16  12    3.84    1.15
   1  16  12    1.77    1.11
  -1 -16 -13    5.99    2.44
  -1  16 -13    5.93    1.22
   1  16  13    6.54    1.54
   1 -16  13    5.84    1.67
   1 -16  13    0.64    1.39
  -1 -16 -14    4.34    1.89
  -1  16 -14    0.29    1.47
   1 -16  14    0.88    1.01
  -1  17  13    5.31    1.31
   1 -17 -13    3.44    1.56
   1  17 -13    3.55    1.19
   1  17 -13    4.32    1.86
  -1  17  12   37.24    3.78
   1 -17 -12   27.29    4.06
   1  17 -12   32.35    4.52
  -1 -17  12   33.36    4.06
   1  17 -12   26.17    3.56
   1 -17 -11   46.52    5.90
   1  17 -11   54.26    5.56
  -1 -17  11   55.76    5.88
   1  17 -11   51.45    6.43
   1 -17 -11   43.41    5.22
   1 -17 -11   60.93    6.27
  -1 -17  11   47.62    5.01
   1 -17 -10   37.11    5.51
  -1 -17  10   43.23    5.50
   1  17 -10   44.39    6.27
   1  17 -10   46.44    5.30
  -1  17  10   54.60    5.36
   1 -17 -10   41.66    5.08
   1 -17 -10   56.48    6.32
  -1 -17  10   43.50    4.92
   1 -17  -9   43.89    6.32
   1  17  -9   58.08    7.22
   1  17  -9   54.68    6.25
  -1 -17   9   63.69    6.64
  -1  17   9   60.28    6.11
   1 -17  -9   52.76    5.97
   1 -17  -9   54.34    6.98
  -1 -17   9   50.40    5.85
   1  17  -8   76.66    8.64
   1  17  -8   79.95    7.76
  -1 -17   8   70.54    7.70
  -1  17   8   70.94    7.19
   1 -17  -8   57.95    6.84
   1  17  -8   71.53    7.04
  -1 -17   8   77.94    7.44
   1 -17  -8   77.44    8.46
   1 -17  -7   64.04    6.92
   1  17  -7   62.42    6.50
   1 -17  -7   45.15    6.65
   1  17  -7   54.56    7.49
   1  17  -7   64.62    7.11
  -1 -17   7   50.07    6.89
  -1  17   7   57.62    6.43
  -1 -17   7   62.97    6.81
   1 -17  -7   66.18    7.61
   1 -17  -6   -0.44    2.12
   1 -17  -6    1.99    2.11
  -1 -17   6   -0.44    2.55
   1  17  -6   -0.46    2.04
   1  17  -6    0.58    2.49
  -1  17   6    0.38    1.69
   1  17  -6    3.54    2.00
  -1 -17   6   -0.40    2.35
  -1 -17   5    1.25    2.22
   1 -17  -5    2.07    2.24
   1  17  -5    5.14    2.89
   1  17  -5    4.88    2.52
  -1 -17   5   -1.31    2.29
  -1  17   5    2.32    1.79
   1  17  -5    1.87    1.77
   1  17  -5    2.59    2.07
   1 -17  -4    2.97    2.64
  -1 -17   4   -0.85    2.37
   1 -17  -4    1.28    1.97
  -1 -17   4   -1.28    2.28
   1  17  -4   -0.55    2.44
   1  17  -4    3.59    2.26
  -1  17   4    1.20    1.68
   1  17  -4    2.36    1.85
   1  17  -4    2.29    2.07
   1 -17  -3   18.76    3.98
  -1 -17   3   15.17    3.57
   1 -17  -3   10.16    3.26
  -1  17   3   16.54    3.27
   1  17  -3   20.63    3.62
   1  17  -3   18.67    3.83
  -1 -17   3   10.95    3.25
  -1  17   3   20.71    3.49
   1  17  -3   12.01    3.48
   1  17  -3   18.23    3.80
  -1 -17   2    6.66    2.77
  -1  17   2    6.36    2.16
   1  17  -2    8.34    3.15
  -1  17   2   10.23    2.89
   1  17  -2    6.86    2.59
   1  17  -2    7.37    2.76
   1 -17  -2    9.78    3.30
   1  17  -1   41.62    5.45
  -1  17   1   36.20    5.03
  -1 -17   1   30.77    5.02
   1  17  -1   36.18    5.46
  -1  17   1   38.44    5.32
   1 -17  -1   32.74    5.28
  -1 -17   0   97.86   10.39
   1 -17   0   93.50   10.08
   1  17   0  104.00   10.31
   1  17   0  101.37   10.48
  -1  17   0  107.45   10.20
   1  17   0   87.98    9.56
  -1  17   0   89.89    9.77
   1  17   0  124.59   11.32
   1 -17   1   22.52    4.45
   1 -17   1   20.12    4.01
  -1 -17  -1   27.37    4.88
   1  17   1   30.08    4.99
  -1  17  -1   17.63    3.67
   1  17   1   25.54    4.33
  -1  17  -1   28.18    4.36
   1  17   1   26.62    4.30
   1  17   1   26.74    3.78
  -1 -17  -2   46.58    6.38
   1 -17   2   35.47    5.47
   1 -17   2   36.35    5.72
   1  17   2   50.36    6.08
   1  17   2   57.28    6.84
  -1  17  -2   42.34    5.44
   1  17   2   47.60    5.92
  -1  17  -2   44.35    5.75
   1  17   2   47.70    5.39
   1 -17   3   32.15    4.98
   1 -17   3   36.37    5.40
  -1 -17  -3   37.42    5.84
   1  17   3   48.26    5.66
   1  17   3   53.80    6.40
  -1  17  -3   30.38    4.82
  -1  17  -3   41.66    5.36
   1  17   3   39.88    4.88
   1 -17   4  358.39   29.75
   1 -17   4  313.42   29.73
  -1 -17  -4  424.55   30.98
   1  17   4  401.07   30.29
  -1  17  -4  325.16   29.60
   1  17   4  437.72   31.08
  -1  17  -4  365.44   30.73
  -1  17  -4  331.73   29.66
   1  17   4  319.34   29.29
   1 -17   5   71.78    8.29
   1 -17   5   83.90    8.94
  -1 -17  -5   97.63    9.69
   1  17   5   94.87    8.96
   1  17   5   99.90    9.05
   1  17   5   79.06    8.24
   1 -17   5   75.39    9.23
  -1  17  -5   83.76    8.72
   1 -17   6    7.13    2.94
  -1 -17  -6    4.77    2.81
   1 -17   6    2.36    1.65
   1  17   6    2.72    2.01
   1  17   6    1.88    1.81
   1  17   6    1.75    1.38
   1 -17   6    2.98    3.10
  -1  17  -6    1.45    1.72
  -1 -17  -7    0.46    2.47
   1 -17   7    2.30    2.52
   1 -17   7    2.39    2.84
  -1  17  -7   -0.35    1.88
   1  17   7    2.23    1.71
   1  17   7   -0.70    1.73
   1  17   7   -0.28    1.22
   1 -17   8  181.72   15.98
  -1 -17  -8  184.28   16.38
   1  17   8  182.88   15.85
  -1  17  -8  172.02   15.63
   1  17   8  171.56   15.57
   1  17   8  176.26   15.31
   1  17   9   28.80    3.64
   1  17   9   20.33    3.63
  -1  17  -9   19.95    3.19
   1  17   9   18.12    3.00
  -1 -17  -9   20.35    3.77
   1 -17   9   17.87    3.49
   1  17  10   27.34    3.58
   1  17  10   25.40    3.60
  -1  17 -10   28.90    4.79
  -1  17 -10   23.17    3.27
  -1 -17 -10   25.16    3.80
   1 -17  10   21.33    3.51
   1  17  10   21.25    3.09
  -1  17 -11    6.34    2.55
  -1  17 -11    4.77    1.42
  -1 -17 -11    3.35    1.58
   1 -17  11    5.34    1.91
   1  17  11    8.73    1.60
   1  17  11    7.28    1.81
  -1  17 -12    4.98    2.31
   1 -17  12    5.99    1.55
   1  17  12    6.10    1.46
  -1  17 -13    0.79    1.32
  -1 -18  12   16.82    2.39
   1  18 -12   13.87    2.04
   1 -18 -11    0.66    1.19
  -1 -18  11    2.36    1.63
   1  18 -11   -0.21    1.06
   1  18 -11   -1.58    1.73
   1 -18 -10    8.58    2.44
  -1 -18  10   14.74    2.84
   1  18 -10   13.84    2.53
   1  18 -10   10.07    2.87
  -1  18  10   17.39    2.60
  -1 -18  10   16.53    2.22
   1 -18 -10   13.54    3.17
   1 -18  -9   -0.61    1.66
  -1 -18   9   -2.63    2.14
   1  18  -9    0.31    1.52
   1  18  -9    0.83    2.31
  -1  18   9    0.57    1.41
   1 -18  -9    1.21    2.15
  -1 -18   9    1.16    1.52
   1  18  -8   56.29    6.58
  -1 -18   8   60.35    6.40
   1  18  -8   64.32    6.23
  -1  18   8   61.38    5.84
  -1 -18   8   55.11    5.74
   1 -18  -8   68.30    7.07
   1  18  -7   17.68    3.05
  -1 -18   7   19.35    3.57
   1  18  -7   15.79    3.38
  -1  18   7   17.42    2.68
   1  18  -7   18.22    2.54
   1 -18  -7   19.97    4.02
  -1 -18   7   23.84    3.31
   1 -18  -6   18.49    3.22
  -1 -18   6   15.06    3.62
   1  18  -6   19.25    3.95
   1  18  -6   22.06    3.69
  -1  18   6   22.15    3.41
   1  18  -6   17.19    2.98
  -1 -18   6   13.76    3.35
  -1 -18   5   46.71    5.58
   1  18  -5   38.74    4.79
   1 -18  -5   33.54    4.73
   1  18  -5   46.89    5.70
  -1 -18   5   35.30    5.20
   1  18  -5   36.06    5.33
  -1  18   5   46.19    5.06
   1  18  -5   28.75    4.66
   1 -18  -4   25.99    4.59
  -1 -18   4   26.82    4.43
   1 -18  -4   23.85    3.97
  -1 -18   4   22.64    4.09
   1  18  -4   26.55    4.53
   1  18  -4   27.88    4.52
  -1  18   4   34.99    4.34
   1  18  -4   24.93    3.93
   1  18  -4   25.68    4.20
  -1 -18   3   34.92    4.81
   1 -18  -3   23.97    4.45
   1 -18  -3   24.61    4.09
  -1 -18   3   21.20    4.02
   1  18  -3   38.47    5.21
  -1  18   3   32.13    4.34
   1  18  -3   25.57    3.96
   1  18  -3   25.03    4.37
   1 -18  -2   -0.87    2.34
   1 -18  -2   -0.75    1.91
  -1  18   2   -0.81    1.75
   1  18  -2   -0.38    1.74
   1  18  -2   -0.93    2.14
  -1  18   2    1.07    1.68
   1  18  -2   -1.05    2.41
  -1  18   1    0.73    1.74
   1  18  -1   -1.08    2.48
   1 -18  -1    1.69    2.51
  -1  18   1    0.42    1.80
   1  18  -1    3.78    2.39
   1  18  -1   -0.39    1.79
  -1  18   0   21.95    3.71
   1  18   0   21.72    4.65
   1 -18   0   20.46    3.98
  -1 -18   0   24.54    4.37
   1  18   0   23.13    4.11
   1  18   0   21.76    3.80
  -1  18   0   26.21    4.09
  -1  18  -1    0.37    1.68
   1  18   1    3.22    2.76
   1 -18   1   -0.40    2.09
  -1 -18  -1    0.45    2.70
   1  18   1    0.40    1.71
  -1  18  -1    2.93    2.00
   1  18   1   -0.46    1.85
   1  18   2   17.69    3.90
  -1  18  -2    7.27    2.40
   1  18   2   16.02    3.14
   1  18   2   12.08    3.17
  -1  18  -2   14.49    2.93
   1 -18   2   15.65    3.20
   1 -18   2    8.73    3.27
  -1 -18  -2    8.25    3.06
   1  18   3  305.01   24.83
  -1  18  -3  279.25   24.57
  -1  18  -3  268.30   24.57
   1 -18   3  269.48   24.71
  -1 -18  -3  324.52   25.51
   1 -18   3  263.04   24.50
   1  18   4   64.20    6.74
  -1  18  -4   52.33    6.38
   1 -18   4   61.57    6.56
  -1 -18  -4   62.57    7.36
   1 -18   4   53.81    6.83
   1  18   5   75.53    7.41
  -1  18  -5   69.30    7.26
  -1 -18  -5   65.42    7.90
   1 -18   5   58.72    6.84
   1 -18   5   64.44    7.47
   1  18   5   78.73    7.63
  -1  18  -6   -0.48    2.19
  -1  18  -6   -0.65    1.58
   1 -18   6    0.36    2.31
  -1 -18  -6    0.88    2.40
   1  18   6   -0.35    1.66
   1  18   6    0.67    1.53
  -1  18  -7    6.29    2.06
  -1  18  -7    7.94    2.91
   1 -18   7    6.72    2.62
  -1 -18  -7   10.00    2.94
   1  18   7    9.77    2.30
   1  18   7    7.85    2.25
  -1  18  -8   -0.80    1.37
  -1  18  -8   -1.33    2.35
   1  18   8   -0.28    1.42
   1  18   8   -1.45    1.39
  -1 -18  -8   -1.91    2.38
   1 -18   8   -2.10    2.12
   1  18   9   36.83    4.54
   1  18   9   42.05    4.47
  -1  18  -9   32.38    4.00
  -1  18  -9   39.51    5.18
   1  18   9   35.54    4.14
   1 -18   9   34.42    4.48
  -1 -18  -9   35.42    4.71
   1  18  10   35.33    3.82
   1  18  10   30.46    3.67
  -1  18 -10   29.09    3.38
  -1  18 -10   41.45    4.78
   1  18  10   32.68    3.55
  -1 -18 -10   27.79    3.78
   1 -18  10   29.40    3.72
   1 -18  11   21.20    2.38
  -1  18 -11   25.95    3.31
   1  19 -11   -0.40    0.66
  -1 -19  10   14.51    2.38
   1  19 -10   14.36    2.19
  -1  19  10   14.74    2.19
  -1 -19   9    0.75    1.60
   1  19  -9    0.23    1.16
  -1 -19   9    0.61    1.00
   1 -19  -9   -0.30    1.94
  -1  19   9    0.23    1.20
  -1 -19   8   17.16    3.29
   1  19  -8   20.28    3.13
   1 -19  -8   24.23    3.84
  -1 -19   8   19.40    2.86
  -1  19   8   22.98    3.13
   1  19  -7  110.48   10.37
  -1 -19   7  100.96   10.44
  -1 -19   7  113.99   10.14
  -1  19   7  112.43   10.21
  -1 -19   6    1.04    2.30
   1  19  -6   -0.35    1.75
  -1  19   6    0.91    1.56
   1  19  -6    0.21    0.97
  -1 -19   6   -1.51    1.98
   1  19  -5  187.90   18.45
   1 -19  -5  203.04   18.59
   1  19  -5  267.79   19.86
  -1 -19   5  211.42   19.20
  -1  19   5  248.17   19.24
  -1 -19   5  263.13   19.48
   1 -19  -5  222.13   19.58
  -1 -19   4   16.68    3.29
   1 -19  -4   14.24    3.37
   1 -19  -4   15.58    2.80
   1  19  -4   20.10    3.82
   1  19  -4   16.78    2.73
  -1  19   4   19.92    3.17
   1  19  -4   14.45    3.19
   1  19  -3   55.57    5.97
   1 -19  -3   46.73    5.82
   1  19  -3   74.31    7.22
  -1  19   3   54.49    6.25
   1  19  -3   53.66    6.46
  -1 -19   3   60.20    6.67
   1 -19  -3   61.81    6.82
   1 -19  -2    5.32    2.58
   1 -19  -2    5.73    1.99
   1  19  -2    6.80    2.74
  -1  19   2    4.63    1.96
   1  19  -2    7.87    2.08
   1  19  -2   10.21    2.62
   1 -19  -1    1.48    2.28
   1 -19  -1    1.18    1.66
  -1  19   1   -0.30    1.54
   1  19  -1   -0.93    2.19
  -1  19   1   -1.09    1.84
   1  19  -1   -0.61    1.30
   1  19  -1   -0.42    1.89
   1 -19   0    2.71    1.90
  -1  19   0    3.70    1.70
   1  19   0    4.71    2.48
   1 -19   0    2.17    2.07
  -1 -19   0    3.88    2.49
  -1  19   0   10.17    2.53
   1  19   0    5.87    2.00
   1  19   0    2.94    2.04
   1  19   1    0.47    2.19
  -1  19  -1    0.62    1.52
  -1  19  -1   -0.71    1.59
   1  19   1   -0.31    1.46
   1  19   1    0.83    1.94
   1 -19   1   -1.74    1.93
  -1 -19  -1   -0.78    2.14
   1  19   2   71.32    7.17
  -1  19  -2   64.44    7.03
   1  19   2   92.87    8.44
  -1 -19  -2   74.53    7.72
   1 -19   2   55.99    7.05
  -1  19  -2   64.53    7.16
   1  19   2   74.32    7.65
  -1  19  -3    7.64    2.22
   1 -19   3   11.45    2.61
  -1 -19  -3   14.75    3.28
   1  19   3   15.02    2.59
  -1  19  -4    6.24    2.09
  -1 -19  -4    7.11    2.78
   1 -19   4    5.75    2.03
   1  19   4    3.19    1.68
  -1  19  -5    1.69    1.30
   1  19   5    4.29    1.89
   1  19   5    2.49    1.50
  -1 -19  -5    2.31    2.24
   1 -19   5    0.42    0.82
   1 -19   5    3.40    2.23
   1  19   6   44.95    5.13
  -1  19  -6   48.91    5.24
   1 -19   6   52.31    5.71
  -1 -19  -6   47.41    5.92
   1  19   6   48.17    5.44
  -1  19  -7    2.37    1.67
  -1  19  -7    1.12    1.14
   1  19   7    1.59    1.32
   1  19   7    1.43    1.31
   1 -19   7    2.77    1.73
  -1 -19  -7   -0.34    1.87
   1  19   8    2.22    1.75
  -1  19  -8    1.59    1.01
  -1  19  -8    1.35    1.46
   1  19   8    0.42    1.03
   1  19   8    1.12    1.18
   1 -19   8    1.42    1.63
  -1 -19  -8    2.33    1.93
  -1 -19  -9    4.43    2.04
   1  19   9   19.34    2.43
  -1  19  -9   11.64    2.22
  -1 -19  -9   12.77    2.36
   1 -19   9   16.74    2.14
   1  19   9   22.00    2.37
   1  20  -9    0.42    0.68
   1  20  -8   93.30    8.59
   1 -20  -8   84.78    8.73
  -1  20   8  111.23    8.74
   1  20  -7    3.94    1.41
  -1 -20   7    5.28    1.46
  -1  20   7    5.52    1.50
   1  20  -6   36.90    4.18
  -1 -20   6   27.79    3.78
  -1  20   6   36.55    4.04
   1  20  -5   50.41    5.16
  -1 -20   5   40.49    4.81
   1 -20  -5   39.39    5.02
  -1  20   5   38.73    4.64
   1  20  -4   11.01    2.48
  -1  20   4   11.68    2.24
   1 -20  -4    8.84    2.48
  -1 -20   4    8.38    2.39
   1 -20  -3   16.73    2.58
   1  20  -3   31.28    3.94
  -1  20   3   22.12    3.19
  -1 -20   3   22.26    3.56
   1 -20  -3   21.81    3.48
   1 -20  -2   -0.63    1.70
   1 -20  -2   -0.38    1.08
   1  20  -2   -0.36    1.68
  -1  20   2    1.66    1.52
   1  20  -2   -0.19    0.88
   1  20  -2   -0.98    1.53
   1 -20  -1    3.08    2.01
   1 -20  -1    4.83    1.49
   1  20  -1    4.78    2.10
  -1  20   1    3.59    1.67
   1  20  -1    3.96    1.31
   1  20  -1    6.07    1.77
  -1 -20   0    0.32    1.90
   1 -20   0    1.78    1.79
   1 -20   0    0.21    1.19
   1  20   0   -1.48    2.00
   1  20   0    0.21    0.98
  -1  20   0   -0.53    1.28
   1  20   0   -1.36    1.78
   1 -20   1    1.69    1.71
  -1 -20  -1    0.32    1.90
   1 -20   1   -0.85    1.38
   1  20   1    0.37    1.69
  -1  20  -1    0.24    1.21
   1  20   1    2.29    1.18
  -1  20  -1    0.74    1.13
   1  20   1    3.04    1.74
   1 -20   2   11.65    2.23
  -1  20  -2   14.40    2.41
   1  20   2    9.77    1.93
   1  20   2   18.66    2.98
   1 -20   2   15.13    2.66
  -1 -20  -2   16.12    3.03
   1 -20   3   68.35    6.90
   1  20   3   75.16    6.89
  -1  20  -3   72.95    6.96
   1  20   3   80.31    7.57
   1 -20   3   65.20    6.85
  -1 -20  -3   79.33    7.64
   1  20   4   28.86    2.52
  -1  20  -4   33.16    2.82
  -1 -20  -4   35.73    3.77
   1  20   5   18.18    2.24
  -1  20  -5   13.81    2.16
   1  20   5   11.87    2.40
  -1 -20  -5    9.53    2.56
   1  20   6    0.55    1.55
  -1  20  -6    0.15    0.79
  -1 -20  -6   -0.27    1.63
   1  20   6    0.23    1.02
   1  20   7    6.81    1.81
  -1 -20  -7    5.42    1.70
   1  20   7    5.23    1.42
   1 -21  -6   15.29    2.46
   1  21  -6   25.73    2.63
   1 -21  -5   -0.41    1.28
  -1 -21   5   -0.81    1.07
   1  21  -5    2.49    1.18
   1 -21  -4    5.31    1.78
  -1 -21   4    7.45    1.80
   1  21  -4    8.47    1.77
  -1 -21   3    1.15    1.58
   1 -21  -3    1.38    1.47
   1  21  -3    3.55    1.45
  -1 -21   2    0.98    1.61
   1 -21  -2    0.23    1.36
   1  21  -2   -0.25    1.24
   1  21  -2   -0.37    1.08
   1  21  -1   -0.26    1.23
   1 -21  -1   -0.45    1.36
   1  21   0    1.70    1.26
   1 -21   0    2.77    1.49
   1  21   1    7.76    1.89
   1 -21   1    6.76    1.67
  -1 -21  -1    4.52    1.88
   1  21   2    2.12    1.41
  -1 -21  -2    0.49    1.51
   1  21   3    3.12    1.28
  -1 -21  -3    3.28    1.69
   1  21   4    9.66    2.20
  -1 -21  -4   14.40    2.38
   1  21   5   24.92    3.27
  -1 -21  -5   27.18    3.24
   2   0 -21   -0.49    0.69
  -2   0  21   -0.25    0.88
  -2   0  21   -0.25    1.23
  -2   0  21    0.44    1.30
  -2   0  21   -1.48    1.20
   2   0 -21   -0.22    1.20
  -2   0  21   -0.22    1.38
   2   0 -21   -0.68    1.55
  -2   0  20    2.72    1.36
  -2   0  20   -0.13    0.24
  -2   0  20    3.69    1.89
  -2   0  20    1.84    2.01
   2   0 -20    2.50    1.95
  -2   0  20    6.78    2.26
   2   0 -20    6.97    2.68
  -2   0  19   -2.03    1.60
  -2   0  19   -2.24    2.27
   2   0 -19    0.84    2.71
  -2   0  19   -0.40    2.01
   2   0 -19    0.39    2.18
  -2   0  18   -0.26    1.83
   2   0 -18    4.01    2.23
   2   0 -18    1.37    2.58
  -2   0  18   -1.37    2.18
   2   0 -18    3.95    3.34
  -2   0  18    0.42    2.51
   2   0 -17   -2.12    2.49
   2   0 -17   -1.01    3.10
  -2   0  17   -0.98    2.48
   2   0 -17    0.55    3.33
  -2   0  17    0.46    2.43
   2   0 -16   22.87    4.78
   2   0 -16   23.81    4.78
  -2   0  16   26.23    4.54
  -2   0  16   26.90    4.73
   2   0 -16   17.89    4.48
   2   0 -15    1.04    2.59
   2   0 -15    0.66    2.77
  -2   0  15    2.35    2.65
   2   0 -15   -2.34    3.53
  -2   0  15    2.51    2.36
   2   0 -15   -2.10    3.11
   2   0 -15    1.11    3.62
  -2   0  15   -1.03    3.22
   2   0 -14  135.75   17.42
   2   0 -14  175.99   16.35
   2   0 -14  172.34   16.70
  -2   0  14  181.38   15.79
  -2   0  14  153.29   17.98
   2   0 -14  174.18   18.41
   2   0 -14  146.39   18.28
  -2   0  13   -1.09    2.02
   2   0 -13   -0.63    2.58
   2   0 -13   -1.05    3.11
   2   0 -13    1.96    3.32
   2   0 -13   -1.68    3.19
  -2   0  13   -1.31    2.74
   2   0 -13    3.85    3.00
   2   0 -12   88.58    9.61
   2   0 -12   90.70   11.38
   2   0 -12   93.54    9.98
   2   0 -12   70.34    7.74
  -2   0  12  110.17   11.31
   2   0 -12   98.32   11.40
   2   0 -11    2.12    2.50
   2   0 -11   -1.58    2.35
   2   0 -11    0.86    2.69
   2   0 -11   -0.50    2.56
   2   0 -10   72.81    9.27
   2   0 -10   78.73   10.02
   2   0  -9   -0.62    2.16
   2   0  -9    0.72    2.72
   2   0  -8  584.26   43.53
   2   0  -8  445.61   41.60
   2   0  -8  591.75   44.59
   2   0  -8  555.33   44.04
   2   0  -7   -0.27    1.26
   2   0  -7    0.47    2.12
   2   0  -7   -1.14    2.74
   2   0  -7   -0.61    2.92
   2   0  -6   99.01    9.19
   2   0  -6   70.06    7.90
   2   0  -6  105.40    9.92
   2   0  -6  101.52    9.85
   2   0  -5    0.63    1.18
   2   0  -5   -1.06    1.79
   2   0  -5   -0.43    2.22
   2   0  -5    0.91    2.47
   2   0  -4  223.68   19.90
   2   0  -4  251.54   21.31
   2   0  -4  236.93   20.59
   2   0  -4  236.97   20.62
   2   0  -3    1.09    2.24
   2   0  -3    1.74    2.17
   2   0  -3    1.68    3.20
   2   0  -2    9.78    3.71
   2   0  -2    9.59    3.07
   2   0  -2    8.66    2.71
   2   0  -1    1.79    2.05
   2   0  -1    3.29    2.15
   2   0  -1    4.44    2.96
   2   0  -1    1.63    2.04
   2   0  -1    2.24    1.93
   2   0   0  536.17   41.79
   2   0   0  551.34   41.87
   2   0   0  482.97   41.35
   2   0   0  472.84   41.73
   2   0   1   -0.70    2.99
   2   0   1   -0.38    2.07
   2   0   1    0.32    2.07
   2   0   1   -0.74    2.34
   2   0   2  180.60   17.59
   2   0   2  203.66   17.70
   2   0   2  221.79   17.51
   2   0   2  188.13   17.40
  -2   0  -3    0.40    1.00
   2   0   3   -0.83    2.28
   2   0   3   -0.71    2.56
   2   0   3    0.98    2.00
   2   0   3    0.84    2.01
   2   0   3    2.42    2.40
  -2   0  -4    8.42    1.92
   2   0   4    8.22    2.97
   2   0   4   10.35    3.39
   2   0   4    6.42    2.82
   2   0   4    4.85    2.72
  -2   0  -5    1.50    1.35
   2   0   5   -1.03    2.33
   2   0   5    1.49    2.24
   2   0   5    2.07    2.76
  -2   0  -6   23.60    3.77
   2   0   6   31.23    5.44
   2   0   6   20.49    4.63
   2   0   6   23.23    4.86
  -2   0  -7   -0.42    1.49
   2   0   7   -0.70    2.88
   2   0   7    1.35    3.05
   2   0   7    0.71    2.99
   2   0   7    0.70    2.86
  -2   0  -8  766.67   55.76
   2   0   8  612.93   54.82
   2   0   8  643.43   54.96
   2   0   8  667.71   57.35
   2   0   8  677.28   57.11
   2   0   8  776.43   58.01
   2   0   8  663.26   57.26
  -2   0  -9    2.91    2.05
   2   0   9    0.94    3.18
   2   0   9   -0.97    3.63
   2   0   9   -1.96    3.57
   2   0   9    0.98    2.40
   2   0   9   -0.50    2.17
   2   0   9   -0.97    3.03
   2   0  10  143.21   15.25
   2   0  10  165.87   15.83
   2   0  10  156.58   18.18
   2   0  10  181.12   14.53
   2   0  10  173.37   15.63
   2   0  10  162.50   18.33
   2   0  10  164.47   18.47
   2   0  10  140.29   17.50
   2   0  10  151.53   15.08
   2   0  10  143.15   15.44
  -2   0 -10  160.62   16.10
  -2   0 -10  179.46   16.49
   2   0  11    0.57    2.53
   2   0  11    1.29    2.43
   2   0  11   -3.77    3.74
   2   0  11   -4.83    4.39
   2   0  11   -1.27    4.46
   2   0  11    1.25    3.52
   2   0  11    3.29    2.01
   2   0  11    0.58    2.67
   2   0  11    0.52    2.33
   2   0  11    1.26    2.84
  -2   0 -11   -0.68    2.22
  -2   0 -11   -0.78    1.93
   2   0  12    2.49    2.81
   2   0  12    3.51    3.43
   2   0  12    6.87    5.00
   2   0  12    2.77    3.91
   2   0  12    1.37    3.85
   2   0  12    1.32    3.72
   2   0  12    2.08    1.87
   2   0  12   -0.75    2.50
   2   0  12   -0.63    2.91
   2   0  12    2.75    2.69
   2   0  12   -1.37    2.96
  -2   0 -12    1.42    2.21
  -2   0 -12    0.89    2.05
   2   0  13    1.96    3.01
   2   0  13    1.48    3.02
   2   0  13   -1.46    3.87
   2   0  13    1.45    3.60
   2   0  13   -2.92    3.88
   2   0  13   -1.39    4.14
   2   0  13    2.14    2.22
   2   0  13    4.28    2.10
   2   0  13    3.33    3.25
   2   0  13   -1.72    2.85
   2   0  13    6.54    3.61
  -2   0 -13    0.73    2.74
  -2   0 -13   -1.98    2.94
   2   0  14   -1.42    3.52
   2   0  14   -4.46    5.76
  -2   0 -14   -1.06    2.83
  -2   0 -14    2.20    2.48
   2   0  14    3.81    2.35
   2   0  14   -2.70    2.97
   2   0  14    0.58    2.61
   2   0  14    4.42    3.59
   2   0  14    0.75    3.36
   2   0  14    3.31    3.11
   2   0  14   -1.48    5.22
   2   0  15   -1.75    2.48
   2   0  15    5.25    3.70
   2   0  15   -1.13    2.70
   2   0  15   -1.44    3.09
   2   0  15    1.28    2.95
   2   0  15   -0.72    3.53
   2   0  16   79.87    8.61
   2   0  16   76.78   10.06
   2   0  16   94.35   10.59
   2   0  16   99.37   10.86
   2   0  16  103.59   10.66
   2   0  16   96.48    9.99
   2   0  17   -1.61    3.03
   2   0  17   -1.19    2.84
   2   0  17    0.52    2.89
   2   0  17   -1.76    2.58
   2   0  17    1.82    2.22
   2   0  18   14.37    3.39
   2   0  18    3.48    2.64
   2   0  18   10.20    3.29
   2   0  18    7.76    2.91
   2   0  18    9.52    2.72
   2   0  19   -0.70    2.01
   2   0  19    1.18    2.18
  -2   0 -19   -0.57    1.09
   2   0  19    0.38    1.90
   2   0  19   -0.33    2.13
   2   0  19   -0.53    1.46
   2   0  20    2.45    1.57
  -2   0 -20    1.83    1.75
   2   0  20    0.28    1.36
   2   0  20    3.67    1.62
   2   0  20    2.57    1.52
  -2   1  21   14.98    1.78
  -2  -1  21   13.44    1.77
   2   1 -21   17.53    1.77
   2  -1 -21   16.97    1.70
  -2   1  21   16.31    2.42
  -2  -1  21    6.81    1.97
   2  -1 -21    1.92    1.47
  -2   1  21    2.38    1.48
  -2  -1  21   14.57    2.35
   2   1 -21   13.02    2.35
  -2   1  20    3.67    1.41
   2   1 -20    5.30    1.53
  -2  -1  20    5.00    1.50
  -2   1  20    3.94    1.99
  -2  -1  20    5.96    2.24
   2  -1 -20   -0.94    1.83
  -2  -1  20    6.68    2.28
   2   1 -20    0.97    2.27
  -2  -1  19    5.10    1.75
  -2   1  19    7.38    1.89
  -2  -1  19    4.40    2.54
   2   1 -19    3.69    2.65
  -2   1  19    6.34    2.62
   2  -1 -19    4.35    2.58
  -2   1  18   11.97    2.47
  -2  -1  18   18.73    3.80
   2   1 -18   16.87    4.06
   2  -1 -18   10.83    3.12
  -2   1  18   15.77    3.60
   2  -1 -18   11.59    3.67
  -2  -1  17    4.57    1.46
  -2   1  17    5.18    2.08
  -2  -1  17    7.19    2.94
   2   1 -17    2.14    3.11
   2  -1 -17   -1.10    2.98
   2   1 -17    4.49    2.67
  -2   1  17    5.82    2.86
   2  -1 -17    7.68    3.64
  -2   1  16   34.60    4.28
  -2  -1  16   35.86    5.15
   2   1 -16   24.33    5.18
   2  -1 -16   23.81    5.03
   2   1 -16   17.93    4.58
  -2   1  16   31.56    4.99
   2  -1 -16   30.19    3.61
   2  -1 -16   18.34    4.58
   2  -1 -15   72.77   11.11
   2  -1 -15   75.02   11.62
  -2   1  15   94.64   11.94
   2   1 -15   88.95   11.86
   2  -1 -15   77.49   11.11
  -2  -1  15   91.82    8.76
  -2  -1  15   98.21    9.49
   2   1 -15   80.58    9.79
   2   1 -15   71.43    9.69
   2  -1 -15   78.25    9.93
   2  -1 -15   81.02    8.09
  -2   1  15   84.95    9.26
  -2  -1  15   97.00   11.97
   2  -1 -14  616.92   52.64
   2   1 -14  555.37   52.33
  -2  -1  14  721.79   49.41
   2   1 -14  546.56   49.91
   2   1 -14  553.87   50.46
   2  -1 -14  611.39   50.71
   2  -1 -14  563.73   48.49
  -2   1  14  690.56   50.09
  -2   1  14  549.52   52.02
   2  -1 -14  621.66   52.98
   2  -1 -14  577.71   52.97
  -2   1  13   59.79    7.44
  -2  -1  13   42.37    6.52
   2   1 -13   31.49    6.93
   2  -1 -13   47.14    7.53
  -2  -1  13   54.24    5.58
   2   1 -13   40.11    6.24
   2   1 -13   33.50    6.13
   2  -1 -13   39.30    6.40
   2  -1 -13   40.49    4.79
   2  -1 -13   40.10    7.40
   2  -1 -13   25.64    6.98
  -2  -1  12   24.48    5.87
   2   1 -12   33.42    6.51
   2  -1 -12   34.32    6.34
  -2  -1  12   35.88    5.30
  -2  -1  12   46.17    4.95
   2   1 -12   27.06    5.28
   2  -1 -12   34.25    5.61
   2  -1 -12   38.72    7.04
   2  -1 -12   34.62    4.23
   2   1 -12   30.31    5.37
   2   1 -11   22.56    4.35
   2   1 -11   18.85    4.23
   2  -1 -11   15.85    3.82
   2  -1 -11   19.28    3.02
  -2  -1  11   26.03    5.22
   2   1 -11   29.33    5.56
   2  -1 -11   26.01    5.20
   2  -1 -11   33.39    6.18
   2  -1 -10    4.21    1.50
  -2  -1  10    1.96    2.39
   2   1 -10    4.70    2.00
   2   1 -10    5.78    3.05
   2  -1 -10    4.06    2.64
   2  -1 -10    0.81    2.75
   2   1  -9  263.38   24.82
   2   1  -9  251.81   23.70
   2  -1  -9  294.97   24.83
   2  -1  -9  308.32   25.83
   2   1  -8   91.80   10.31
   2  -1  -8  102.98   10.37
   2   1  -8   83.67    9.41
   2  -1  -8  100.41   11.42
   2  -1  -8  112.39   11.33
   2  -1  -7  231.88   19.27
   2   1  -7  190.74   18.50
   2   1  -7  196.99   19.18
   2  -1  -7  228.31   19.99
   2  -1  -7  245.27   20.44
   2   1  -6  510.52   45.86
   2  -1  -6  591.05   45.93
   2   1  -6  519.97   45.31
   2  -1  -6  662.25   47.18
   2  -1  -6  571.63   46.52
   2   1  -5  149.18   14.88
   2  -1  -5  185.69   14.98
   2   1  -5  157.27   14.55
   2  -1  -5  174.50   15.58
   2  -1  -5  172.03   15.47
   2  -1  -4  547.06   41.23
   2   1  -4  449.44   40.91
   2   1  -4  514.42   42.49
   2  -1  -4  570.28   42.13
   2  -1  -4  493.22   41.69
   2  -1  -3  210.08   18.95
   2  -1  -3  224.47   19.01
   2   1  -3  218.48   19.54
   2  -1  -2 1336.99  112.23
   2   1  -2 1487.05  112.86
   2  -1  -2 1449.85  112.38
   2  -1  -1  684.19   53.44
   2  -1  -1  640.17   53.11
   2   1  -1  700.56   53.61
   2   1  -1  619.22   53.43
   2  -1  -1  655.85   53.16
   2   1   0 1475.36  117.93
   2  -1   0 1478.89  117.67
   2   1   0 1435.92  118.05
   2  -1   0 1568.86  118.12
   2   1   1 1012.22   84.62
   2  -1   1 1095.67   84.70
   2   1   1 1118.79   84.58
   2  -1   1 1019.06   84.20
  -2   1  -2    2.09    0.87
   2   1   2    3.74    2.66
   2  -1   2    3.19    2.15
   2   1   2    6.68    2.75
   2  -1   2    6.61    2.46
  -2  -1  -3  347.95   25.31
  -2   1  -3  272.69   25.52
   2  -1   3  309.37   27.03
   2   1   3  318.80   27.01
   2   1   3  335.97   26.84
   2  -1   3  303.90   26.49
   2  -1   3  321.85   27.12
  -2   1  -4  365.14   29.93
  -2  -1  -4  338.47   30.16
   2  -1   4  379.90   31.47
   2  -1   4  393.36   31.53
   2   1   4  362.27   31.28
   2   1   4  407.80   31.18
  -2   1  -5  291.23   25.69
  -2  -1  -5  323.86   26.19
   2  -1   5  326.46   27.44
   2   1   5  297.72   27.13
   2  -1   5  343.11   27.47
  -2   1  -6    0.32    1.31
  -2  -1  -6    0.38    1.91
   2  -1   6    3.69    2.78
   2   1   6   15.30    3.67
   2   1   6    5.94    3.17
   2  -1   6   20.06    4.23
  -2   1  -7  177.40   16.40
  -2  -1  -7  232.55   17.35
   2  -1   7  168.92   18.14
   2   1   7  168.23   17.84
   2   1   7  165.29   17.87
   2  -1   7  187.32   18.13
  -2   1  -8  207.53   18.90
  -2  -1  -8  249.76   19.67
   2   1   8  204.55   18.65
   2  -1   8  210.57   21.02
   2   1   8  176.99   18.40
   2  -1   8  240.49   21.28
   2   1   8  213.87   20.83
   2   1   8  218.49   20.95
  -2   1  -9  248.17   21.61
  -2  -1  -9  264.08   21.96
   2  -1   9  226.18   23.22
   2   1   9  293.77   24.66
   2   1   9  227.05   23.29
   2   1   9  211.91   20.81
   2   1   9  219.15   20.96
   2  -1   9  236.68   23.66
   2   1  10   61.51    7.95
   2  -1  10   63.30   10.17
   2  -1  10   65.74    7.99
   2  -1  10   66.09   10.21
   2   1  10   89.06   11.19
   2   1  10   63.46    9.87
   2   1  10   54.71    6.46
   2  -1  10   70.28    6.99
   2  -1  10   74.51    8.15
   2  -1  10   51.93    7.27
   2   1  10   46.60    7.58
  -2   1 -10   76.66    8.59
  -2   1 -10   86.05    9.02
  -2  -1 -10   64.44    8.30
   2  -1  11  310.08   30.27
   2   1  11  331.46   27.20
   2  -1  11  302.23   26.64
   2   1  11  306.89   30.21
   2   1  11  290.92   29.76
   2  -1  11  278.68   29.35
   2  -1  11  314.37   25.36
   2   1  11  309.17   25.17
   2  -1  11  276.75   25.09
   2  -1  11  291.54   26.51
   2  -1  11  276.64   25.99
   2   1  11  264.84   25.98
   2   1  11  320.48   27.14
  -2  -1 -11  318.09   27.37
  -2   1 -11  310.72   27.73
  -2  -1 -11  290.07   27.41
  -2   1 -11  320.06   27.36
   2  -1  12   50.96    9.38
   2  -1  12   29.26    5.97
   2   1  12   40.38    6.72
   2  -1  12   47.42    8.93
   2   1  12   32.40    8.00
   2   1  12   48.06    9.26
   2   1  12   42.09    5.03
   2  -1  12   41.82    5.24
   2  -1  12   39.81    5.33
   2  -1  12   33.52    6.12
   2   1  12   34.20    5.71
   2  -1  12   41.26    6.09
   2   1  12   34.62    6.31
  -2   1 -12   41.63    6.64
  -2  -1 -12   29.25    5.76
  -2   1 -12   61.62    8.27
  -2  -1 -12   44.02    7.03
   2  -1  13  244.64   28.95
   2  -1  13  299.13   25.99
   2   1  13  264.42   25.93
   2   1  13  303.97   30.24
   2   1  13  235.09   28.55
   2  -1  13  279.13   29.24
   2   1  13  303.98   24.08
   2  -1  13  324.44   24.57
   2   1  13  301.99   24.35
   2  -1  13  275.53   25.66
   2  -1  13  286.43   25.19
   2   1  13  241.69   24.85
   2   1  13  272.36   25.99
  -2  -1 -13  271.14   25.82
  -2   1 -13  305.10   27.90
  -2  -1 -13  275.40   27.13
  -2   1 -13  256.43   25.83
   2  -1  14   83.12   13.45
   2   1  14   90.25   13.98
  -2   1 -14  112.66   11.80
  -2  -1 -14   86.90   10.98
  -2   1 -14   77.59   12.08
  -2  -1 -14   84.75   11.99
   2  -1  14  109.38   10.00
   2   1  14  103.47    9.77
   2  -1  14   97.86   11.26
   2  -1  14   82.17   10.35
   2   1  14  102.57   10.92
   2   1  14  100.06   11.51
   2  -1  14   81.28   13.76
   2  -1  14   93.37   10.96
   2   1  14  122.47   12.20
   2  -1  15    9.26    2.94
   2   1  15    8.10    2.80
   2  -1  15   14.36    4.36
   2  -1  15    9.89    3.43
   2   1  15   14.91    4.17
   2   1  15    8.58    4.21
   2  -1  15   12.08    4.29
   2   1  15    5.03    4.01
   2  -1  16   70.00    6.87
   2   1  16   56.32    6.53
   2  -1  16   64.74    8.28
   2   1  16   61.62    7.76
   2  -1  16   53.83    7.48
   2   1  16   73.91    8.70
   2  -1  16   62.78    8.26
   2   1  16   62.43    8.43
   2   1  17    0.89    1.38
   2  -1  17    0.53    3.01
   2   1  17    2.95    2.72
   2   1  17    1.17    2.68
   2  -1  17    1.03    2.82
   2   1  17   -0.93    2.35
   2  -1  17    6.59    2.74
   2  -1  18   20.44    4.06
   2   1  18   16.62    3.42
   2  -1  18   18.46    3.38
   2   1  18   18.26    3.94
   2   1  18   18.82    4.02
   2  -1  18   16.62    3.72
   2   1  19    3.19    1.28
  -2   1 -19    2.27    1.05
   2  -1  19    1.73    2.05
   2   1  19    4.66    2.43
  -2  -1 -19    3.13    1.28
  -2   1 -19    1.40    1.16
   2  -1  19    2.95    2.01
   2   1  19    7.82    2.56
   2   1  19    3.89    1.82
   2  -1  19    3.09    1.56
  -2   1 -20   -1.12    1.63
   2  -1  20    2.63    1.54
   2   1  20    1.81    1.02
   2   1  20    0.54    1.32
   2   1  20    1.52    1.37
   2  -1  20    0.66    1.30
   2   2 -21    2.54    0.81
  -2  -2  21    5.31    1.26
  -2   2  21    3.52    0.99
  -2   2  21    1.55    1.26
   2   2 -21    1.20    1.18
   2  -2 -21    0.20    1.16
  -2  -2  21    0.19    1.20
  -2   2  21    5.62    1.58
   2   2 -21    1.02    1.52
   2  -2 -21    4.38    1.72
  -2  -2  21    3.07    1.51
   2   2 -20    0.20    1.03
  -2  -2  20    0.38    1.22
  -2   2  20   -0.17    1.13
  -2   2  20    1.13    1.66
   2   2 -20    0.93    2.13
  -2  -2  20    1.15    1.71
   2  -2 -20   -1.62    2.42
  -2  -2  20    0.63    1.68
  -2   2  20    1.84    1.68
  -2   2  20   -0.39    0.44
  -2  -2  20    0.28    1.56
  -2   2  20    2.27    1.98
   2   2 -20   -0.88    1.63
   2  -2 -20    1.52    1.72
  -2   2  19   10.24    1.96
   2   2 -19    7.52    3.04
  -2  -2  19    5.95    2.40
   2  -2 -19    0.85    2.74
  -2   2  19    4.56    2.31
   2  -2 -19    6.99    2.13
  -2  -2  19    9.15    2.68
  -2   2  19   10.98    2.78
   2   2 -19    1.86    2.37
   2  -2 -19    4.71    2.71
  -2   2  18   -0.74    1.60
  -2   2  18   -0.81    2.33
  -2  -2  18   -1.60    2.43
   2  -2 -18    0.50    3.14
   2   2 -18   -1.87    2.85
   2  -2 -18    1.82    2.14
  -2   2  18   -1.30    2.41
  -2  -2  18   -0.43    2.11
   2  -2 -18   -0.46    2.66
   2   2 -18    1.74    2.58
  -2  -2  17    5.84    1.61
  -2   2  17    5.05    2.00
   2   2 -17    7.29    3.47
  -2   2  17   10.55    3.29
  -2  -2  17    6.95    3.01
   2  -2 -17    2.82    3.37
   2  -2 -17    4.48    2.99
   2  -2 -17    2.79    1.28
  -2  -2  17    1.87    2.35
  -2   2  17    3.30    2.52
   2  -2 -17    2.07    3.20
   2   2 -17   -0.48    2.81
  -2   2  16   31.55    4.20
  -2  -2  16   36.64    4.56
  -2  -2  16   30.80    4.84
  -2   2  16   35.79    5.06
   2  -2 -16   30.56    5.79
   2   2 -16   22.18    4.98
   2  -2 -16   27.60    5.25
   2   2 -16   23.66    4.82
   2  -2 -16   23.63    3.67
  -2   2  16   34.78    5.03
  -2  -2  16   27.66    4.80
   2  -2 -16   34.52    5.34
   2   2 -16   20.91    4.66
  -2  -2  15   68.17   10.19
   2  -2 -15   75.54   11.30
   2   2 -15   66.00   10.81
  -2   2  15   65.68    9.98
   2  -2 -15   73.39   10.71
   2   2 -15   60.03    9.89
   2  -2 -15   65.41   10.02
  -2  -2  15   90.31    8.09
  -2   2  15   89.61    7.87
   2   2 -15   73.74    8.86
   2  -2 -15   61.24    8.67
  -2   2  15   82.94    8.41
  -2  -2  15   77.32    8.27
   2   2 -15   53.89    8.42
   2  -2 -15   78.32    9.23
   2  -2 -15   60.96    7.07
  -2   2  15   86.81    8.58
  -2  -2  15   84.17    8.51
  -2   2  15   50.13    9.40
  -2  -2  15   52.47    9.51
   2   2 -14   20.97    5.67
   2  -2 -14   34.63    6.40
  -2  -2  14   31.87    4.38
   2   2 -14   24.19    5.01
   2  -2 -14   33.96    5.88
   2  -2 -14   39.49    5.88
   2   2 -14   23.85    5.05
   2  -2 -14   24.62    3.76
  -2  -2  14   37.83    5.17
  -2   2  14   30.02    4.71
   2   2 -14   31.98    6.68
   2  -2 -14   21.71    6.10
   2   2 -14   29.84    7.01
   2  -2 -14   30.05    6.61
  -2   2  14   26.39    5.87
  -2  -2  14   27.19    5.98
  -2   2  13  130.41   14.65
  -2  -2  13  155.68   14.76
   2   2 -13  161.21   16.55
   2  -2 -13  167.28   16.28
  -2  -2  13  126.08   14.16
  -2  -2  13  155.66   13.05
   2   2 -13  154.45   14.26
   2  -2 -13  129.85   14.01
   2  -2 -13  129.84   14.19
   2   2 -13  143.89   14.63
   2  -2 -13  123.75   12.50
   2  -2 -13  136.84   16.05
   2   2 -13  138.02   15.73
   2   2 -13  151.54   16.69
   2  -2 -13  139.13   16.58
  -2  -2  12  102.83   11.69
   2   2 -12   83.35   11.88
   2  -2 -12   99.40   12.19
  -2  -2  12   93.30   11.04
  -2  -2  12  115.65   10.12
   2   2 -12  108.16   11.10
   2  -2 -12  110.40   11.42
   2   2 -12   86.41   10.88
   2  -2 -12  110.98   11.33
   2  -2 -12  105.94    9.80
   2  -2 -12  114.32   13.16
   2   2 -12  100.41   12.54
   2  -2 -12  103.15   13.17
   2   2 -12  124.78   13.61
  -2  -2  11    9.10    3.41
   2   2 -11    9.95    3.55
   2   2 -11    7.50    2.79
   2  -2 -11   12.55    3.73
  -2  -2  11    8.52    2.26
   2   2 -11   12.59    3.51
   2  -2 -11    7.91    2.84
   2  -2 -11    6.12    2.07
   2  -2 -11    6.21    3.03
   2   2 -11   13.10    3.51
   2   2 -11    5.90    3.69
   2   2 -11    7.23    3.66
   2  -2 -11   14.37    4.27
   2  -2 -10   -0.27    1.31
   2   2 -10    1.55    2.73
   2  -2 -10   -1.64    2.99
  -2  -2  10   -1.24    2.60
   2   2 -10    2.22    2.60
   2   2 -10   -2.22    1.95
   2  -2 -10   -1.31    2.45
   2  -2  -9   14.20    4.83
   2   2  -9   18.26    5.09
   2   2  -9   14.15    4.20
   2  -2  -9   11.85    4.22
  -2  -2   9   12.11    3.83
   2   2  -9    7.23    3.28
   2   2  -9   14.73    3.44
   2  -2  -9    9.05    2.96
   2   2  -8  108.68   12.36
   2   2  -8  110.80   12.09
   2  -2  -8  155.72   13.26
   2  -2  -8  105.94   12.43
  -2  -2   8  111.86   11.73
   2   2  -8  104.70   11.71
   2  -2  -8  126.34   11.69
   2   2  -8  100.69   11.36
   2  -2  -7   20.68    4.60
   2   2  -7   22.46    4.96
   2   2  -7   26.04    4.81
   2  -2  -7   19.52    4.50
   2   2  -7   15.45    3.62
   2   2  -7   21.66    4.16
   2  -2  -7   21.03    3.65
   2   2  -6  646.65   50.35
   2  -2  -6  699.48   50.59
   2   2  -6  571.78   50.18
   2  -2  -6  669.34   50.65
   2  -2  -6  692.84   49.64
   2   2  -6  578.26   49.61
   2  -2  -5 1679.86  134.18
   2  -2  -5 1658.32  133.29
   2   2  -5 1799.35  133.54
   2   2  -5 1547.29  133.39
   2  -2  -5 1803.95  133.61
   2   2  -5 1517.78  132.80
   2  -2  -5 1783.20  132.68
   2  -2  -4   15.65    3.28
   2   2  -4    8.61    3.16
   2  -2  -4   12.99    3.88
   2  -2  -4   12.64    3.10
   2   2  -4    7.01    2.63
   2   2  -4    8.07    3.97
   2   2  -4   10.46    2.74
   2  -2  -4    9.80    2.13
   2  -2  -3  555.90   45.57
   2   2  -3  570.05   45.76
   2   2  -3  539.41   45.51
   2   2  -3  570.07   46.20
   2  -2  -3  592.84   46.06
   2  -2  -3  581.41   45.60
   2  -2  -3  566.71   44.57
   2   2  -3  506.77   45.28
   2   2  -2   81.86    9.02
   2   2  -2  100.73    9.72
   2  -2  -2   90.41    8.97
   2   2  -2   92.86    9.15
   2  -2  -2   99.17    9.52
   2  -2  -2   83.64    8.88
   2  -2  -1  210.21   18.28
   2   2  -1  202.09   18.32
   2   2  -1  204.58   18.69
   2  -2  -1  214.98   18.37
   2   2  -1  222.55   18.47
   2   2  -1  199.54   18.56
   2  -2  -1  215.06   18.63
   2  -2  -1  207.99   18.49
   2   2  -1  221.98   18.70
   2  -2  -1  217.42   18.51
   2  -2   0 1790.85  149.93
   2   2   0 2013.47  150.71
   2  -2   0 1827.68  150.16
   2   2   0 1870.79  150.66
   2  -2   0 1811.10  150.31
   2   2   0 1974.79  150.41
   2  -2   0 2020.97  150.48
   2   2   0 1979.01  150.17
   2  -2   1  693.14   56.58
   2   2   1  727.67   56.67
   2   2   1  738.83   56.50
   2  -2   1  642.79   56.27
   2   2   1  728.38   56.99
   2  -2   1  662.63   56.84
   2  -2   1  725.71   56.89
   2   2   1  788.14   57.07
  -2  -2  -1  666.38   55.75
   2   2   2  319.50   24.65
   2  -2   2  306.51   24.69
   2  -2   2  309.90   24.89
   2  -2   2  305.49   25.20
   2   2   2  315.90   25.25
   2   2   2  330.72   25.23
   2   2   2  314.68   24.83
   2  -2   2  306.04   25.13
  -2  -2  -2  311.02   23.76
  -2   2  -2  254.74   23.16
   2   2   3 1023.65   79.83
   2  -2   3 1046.57   80.01
   2  -2   3 1061.31   80.26
   2   2   3  944.41   80.21
   2  -2   3 1000.14   80.51
   2  -2   3 1056.14   80.55
   2   2   3 1071.83   80.43
   2   2   3 1066.34   80.06
   2   2   3 1013.21   80.43
   2  -2   3 1036.06   80.61
  -2   2  -3  925.68   78.72
  -2  -2  -3  984.40   78.52
   2   2   4 2133.51  145.79
   2  -2   4 1967.25  146.24
   2   2   4 1926.89  145.93
   2   2   4 1832.84  145.89
   2  -2   4 1822.55  146.10
   2  -2   4 1873.55  146.19
   2   2   4 1829.99  145.97
  -2   2  -4 1656.85  144.29
   2   2   5  502.13   43.12
   2  -2   5  468.01   43.20
   2  -2   5  581.17   43.69
   2   2   5  541.11   43.22
   2   2   5  526.71   43.27
   2  -2   5  490.39   43.31
  -2   2  -5  489.19   41.59
  -2  -2  -5  563.06   42.34
   2   2   6  113.00   11.55
   2   2   6   97.54   11.37
   2  -2   6  104.30   11.72
   2  -2   6  104.67   11.68
   2  -2   6  106.57   11.89
   2   2   6  126.23   12.06
   2  -2   6  112.77   11.95
  -2   2  -6  105.58   10.15
  -2  -2  -6  112.86   10.61
   2  -2   7   27.66    5.50
   2  -2   7   20.48    4.93
   2   2   7   28.12    5.10
   2  -2   7   19.32    5.05
   2   2   7   27.01    5.31
   2   2   7   26.43    5.36
   2   2   7   22.07    5.17
   2  -2   7   28.89    5.50
  -2   2  -7   28.04    3.93
  -2   2  -7   28.51    4.58
  -2  -2  -7   26.34    4.21
   2   2   8  126.65   14.38
   2   2   8  153.69   14.84
   2  -2   8  119.00   14.54
   2   2   8  151.55   14.90
   2  -2   8  156.60   15.46
   2  -2   8  137.55   14.87
   2  -2   8  134.65   12.82
   2   2   8  115.24   12.35
   2   2   8  131.33   14.64
   2  -2   8  127.77   12.72
   2   2   8  125.33   12.54
   2  -2   8  132.06   14.82
  -2   2  -8  125.80   13.30
  -2  -2  -8  162.12   13.62
  -2   2  -8  125.64   12.68
   2   2   9   70.95   10.38
   2  -2   9   80.51   11.19
   2  -2   9   90.61   11.54
   2  -2   9   77.41   11.12
   2   2   9   77.89   10.67
   2   2   9   91.25   11.23
  -2   2  -9   83.75    9.24
  -2  -2  -9   94.44    9.72
   2  -2   9   76.89    8.91
   2   2   9   71.29    8.61
   2  -2   9   79.25    9.09
   2   2   9   92.95   11.28
   2   2   9   75.18    8.77
   2  -2   9   84.00   11.21
   2  -2  10  719.59   57.07
   2   2  10  696.01   60.19
   2   2  10  687.00   56.82
   2  -2  10  733.05   60.71
   2  -2  10  608.36   57.02
   2   2  10  667.76   57.13
   2  -2  10  749.42   60.83
   2   2  10  722.92   60.14
   2   2  10  738.92   60.48
   2  -2  10  749.76   60.81
   2  -2  10  741.69   60.39
   2   2  10  694.70   59.85
   2   2  10  686.85   55.60
   2  -2  10  739.14   56.03
   2  -2  10  655.07   55.62
   2  -2  10  696.30   57.00
   2   2  10  687.06   56.86
   2  -2  10  631.46   56.46
   2  -2  10  835.50   57.87
   2   2  10  640.83   56.85
  -2   2 -10  659.41   57.49
  -2  -2 -10  738.94   58.00
   2  -2  11   55.73    7.82
   2   2  11   63.27    7.93
   2  -2  11   64.91    7.87
   2   2  11   82.62   11.22
   2  -2  11   74.68   11.05
   2   2  11   62.89    7.69
   2  -2  11   49.58    9.42
   2   2  11   43.39    9.07
   2  -2  11   59.09    9.99
   2   2  11   67.61   10.26
   2   2  11   61.55   10.09
   2  -2  11   53.41    9.87
   2   2  11   54.79    6.19
   2  -2  11   62.09    6.70
   2  -2  11   56.80    6.48
   2  -2  11   53.74    7.47
   2   2  11   75.09    8.02
   2  -2  11   50.05    6.94
   2  -2  11   45.10    7.48
   2   2  11   46.31    7.35
  -2   2 -11   60.80    8.04
  -2  -2 -11   60.55    7.93
  -2   2 -11   58.16    8.18
  -2  -2 -11   64.21    8.38
   2  -2  12   94.46   11.53
   2   2  12  111.04   11.65
   2  -2  12  115.74   12.23
   2   2  12  116.35   14.79
   2  -2  12  104.45   14.57
   2   2  12  127.81   12.46
   2  -2  12  117.97   15.32
   2   2  12   98.93   14.08
   2  -2  12   70.92   13.18
   2   2  12   88.93   13.67
   2   2  12   88.86   13.79
   2  -2  12  104.50   14.50
   2  -2  12  113.03   10.55
   2   2  12  103.97   10.04
   2  -2  12   95.88   10.24
   2  -2  12  138.28   12.48
   2   2  12  116.67   11.83
   2   2  12  101.29   11.19
   2  -2  12   90.74   10.90
   2   2  12  113.10   11.99
   2  -2  12  117.02   12.23
  -2  -2 -12  111.67   11.95
  -2   2 -12   91.89   12.24
  -2  -2 -12  108.74   12.47
  -2   2 -12   99.72   11.97
   2  -2  13  356.16   31.11
   2   2  13  410.52   32.08
   2  -2  13  333.08   31.50
   2   2  13  360.58   35.21
   2   2  13  365.28   31.16
   2  -2  13  367.33   35.57
   2   2  13  291.54   33.67
   2  -2  13  358.63   35.14
   2   2  13  343.88   34.49
   2  -2  13  352.23   34.71
   2   2  13  334.19   34.86
   2  -2  13  349.32   35.07
   2   2  13  402.89   29.51
   2  -2  13  368.40   29.75
   2  -2  13  336.26   30.98
   2   2  13  377.91   31.31
   2   2  13  342.86   30.65
   2  -2  13  332.47   30.39
   2   2  13  324.65   31.10
   2  -2  13  338.32   31.26
  -2   2 -13  344.28   31.63
  -2  -2 -13  325.65   31.07
  -2   2 -13  306.85   32.23
  -2  -2 -13  356.50   32.46
   2  -2  14   18.01    5.59
   2   2  14    9.75    4.79
   2   2  14    8.74    5.71
   2  -2  14    1.45    5.36
  -2   2 -14    6.26    3.06
  -2  -2 -14   11.30    3.49
  -2  -2 -14    6.83    3.54
   2   2  14   15.62    3.17
   2  -2  14   10.85    3.06
   2  -2  14   15.29    4.41
   2   2  14   16.54    4.39
   2  -2  14   14.94    3.74
   2   2  14    8.39    3.62
   2   2  14   15.19    4.44
   2  -2  14    5.09    3.65
   2   2  14   18.82    4.44
   2  -2  14    2.91    4.41
   2  -2  14   16.78    4.26
   2  -2  14   16.80    4.25
   2   2  14    7.25    5.35
   2   2  14   10.96    4.04
   2  -2  15  284.74   22.25
   2   2  15  247.09   21.74
   2  -2  15  246.83   23.42
   2   2  15  256.31   23.56
   2  -2  15  243.40   22.77
   2   2  15  246.52   23.05
   2  -2  15  236.66   23.52
   2   2  15  263.40   23.91
   2  -2  15  280.65   24.08
   2  -2  15  263.78   23.55
   2   2  15  254.39   23.96
   2   2  15  250.64   23.45
   2   2  16   35.86    4.61
   2  -2  16   36.17    6.07
   2   2  16   38.77    6.35
   2   2  16   32.65    5.65
   2  -2  16   38.64    5.72
   2  -2  16   39.09    6.31
   2   2  16   32.10    5.96
   2  -2  16   42.73    6.53
   2  -2  16   39.03    6.19
   2   2  16   44.74    6.55
   2   2  16   43.16    6.64
   2   2  17   11.80    2.32
   2   2  17   16.35    3.76
   2  -2  17   13.36    3.15
   2   2  17   19.42    4.25
   2  -2  17   11.99    3.89
   2  -2  17   11.50    3.88
   2   2  17   12.73    3.86
   2  -2  17   12.45    3.97
   2  -2  17   10.54    3.67
   2   2  17   10.17    3.75
   2   2  17   17.17    4.01
   2   2  18    0.38    2.24
   2  -2  18    0.64    1.68
   2  -2  18   -2.60    2.74
   2   2  18    2.19    2.47
   2   2  18   -3.88    2.77
   2  -2  18   -0.48    2.26
   2  -2  18    0.47    2.14
   2   2  18    0.47    2.21
   2  -2  18    0.41    2.42
   2   2  18    2.52    2.40
   2   2  19    3.29    1.35
   2  -2  19    4.99    2.28
   2   2  19    5.04    2.26
  -2  -2 -19    2.78    1.37
   2   2  19    3.74    2.05
   2  -2  19    4.46    2.18
  -2   2 -19   -0.45    0.60
   2   2  19    4.17    2.34
   2   2  19    6.11    2.14
   2  -2  19    7.41    2.30
   2  -2  19    3.13    1.98
   2   2  19    4.29    1.80
   2  -2  19    4.79    1.44
   2   2  20   54.82    4.83
  -2  -2 -20   20.92    4.11
  -2   2 -20   14.37    3.93
   2  -2  20   35.56    4.38
   2   2  20   65.84    4.70
   2   2  20   32.47    4.34
   2  -2  20   34.71    4.40
   2   2  20   68.27    5.14
   2  -2  20   50.36    4.70
   2  -2  20   69.43    4.95
   2   2  20   83.55    5.28
  -2  -3  21    4.05    1.13
   2   3 -21    3.85    0.88
  -2  -3  21    0.33    1.05
  -2   3  21    1.96    1.17
   2   3 -21    1.61    1.39
   2  -3 -21    0.69    1.15
  -2  -3  21    4.98    1.38
  -2   3  21    3.23    1.27
   2   3 -21    3.66    1.40
   2  -3 -21    1.63    1.38
   2   3 -20    4.87    1.42
  -2   3  20    4.32    1.25
   2  -3 -20    7.07    2.53
  -2  -3  20    2.90    1.71
  -2   3  20    3.84    1.83
   2   3 -20    3.72    2.15
  -2  -3  20    7.53    2.11
  -2   3  20    5.00    1.77
  -2   3  20   -0.12    0.34
  -2  -3  20    1.15    1.43
   2   3 -20    1.37    1.61
   2  -3 -20    3.16    1.81
  -2   3  20    0.87    1.57
  -2  -3  20    1.02    1.59
  -2   3  20    2.33    1.74
  -2   3  19    1.00    1.39
   2   3 -19    1.62    1.24
   2  -3 -19   -0.41    2.71
   2   3 -19    0.75    2.45
  -2   3  19    0.65    1.89
  -2  -3  19    1.31    1.94
   2  -3 -19   -0.68    1.81
  -2  -3  19   -0.36    1.71
  -2   3  19   -0.35    1.72
  -2   3  19    0.41    0.94
   2  -3 -19    2.29    2.30
   2   3 -19    1.06    1.85
  -2   3  18  110.01    5.25
  -2   3  18  107.39    6.60
   2   3 -18  121.11    7.55
   2  -3 -18  113.85    7.90
  -2  -3  18  118.30    6.72
   2  -3 -18   88.38    6.68
  -2  -3  18  102.31    6.52
  -2   3  18  118.30    6.98
   2   3 -18   71.03    5.93
   2  -3 -18   70.87    6.03
  -2  -3  17  143.00   11.52
  -2  -3  17  111.85   10.51
  -2   3  17  134.60   11.05
   2   3 -17  117.65   12.16
  -2  -3  17  121.96   11.65
   2  -3 -17  118.59   12.47
  -2   3  17  115.11   11.61
   2  -3 -17  105.20   12.17
   2  -3 -17  114.66   10.81
  -2  -3  17  134.06   11.99
  -2   3  17  148.17   12.28
   2   3 -17   86.06   11.53
   2  -3 -17  111.38   12.05
  -2   3  16  137.63   11.36
  -2  -3  16  142.21   11.81
  -2   3  16  119.06   11.87
   2   3 -16  122.93   12.42
   2  -3 -16  109.74   12.59
  -2  -3  16  113.02   11.73
   2  -3 -16  118.42   12.68
   2  -3 -16  108.54   11.04
  -2  -3  16  133.06   12.15
  -2   3  16  141.22   12.33
   2  -3 -16  132.34   12.79
   2   3 -16   86.27   11.63
   2  -3 -15   60.40   10.39
   2   3 -15   65.55    9.99
   2   3 -15   53.58    9.73
  -2   3  15   70.82   10.11
  -2  -3  15   72.17   10.09
   2  -3 -15   63.76   10.25
   2  -3 -15   50.08    8.97
  -2  -3  15   86.07    7.82
  -2   3  15   78.85    7.49
  -2  -3  15   67.15    7.76
   2  -3 -15   57.41    8.53
  -2   3  15   75.29    8.15
   2   3 -15   58.79    8.25
   2  -3 -15   68.44    8.67
   2   3 -15   47.48    7.94
   2  -3 -15   72.97    7.27
  -2   3  15   89.14    8.40
  -2  -3  15   83.22    8.24
   2   3 -15   82.78    8.54
  -2  -3  15   59.87    9.58
   2  -3 -15   75.53    8.82
  -2   3  15   50.82    9.12
   2  -3 -14   54.19    8.48
  -2  -3  14   68.04    6.74
   2  -3 -14   52.06    7.78
   2   3 -14   61.22    7.61
  -2  -3  14   56.05    7.93
   2  -3 -14   57.64    7.80
   2   3 -14   49.32    7.47
   2  -3 -14   54.59    6.20
  -2  -3  14   56.03    6.93
  -2   3  14   61.59    7.06
   2  -3 -14   48.50    8.82
   2   3 -14   57.56    8.98
   2  -3 -14   42.04    8.68
   2   3 -14   44.39    8.61
  -2   3  14   58.43    9.06
  -2  -3  14   56.99    8.86
  -2  -3  13   12.10    3.59
   2  -3 -13    5.26    2.96
  -2  -3  13    9.29    3.38
  -2  -3  13   13.01    2.72
   2  -3 -13   10.21    3.83
   2   3 -13   15.12    4.23
   2  -3 -13   14.72    3.86
   2   3 -13   15.33    4.03
   2  -3 -13   10.67    2.53
   2  -3 -13    6.35    4.06
   2   3 -13    7.63    3.67
   2  -3 -13    7.87    4.43
   2   3 -13    7.14    4.14
  -2  -3  12  247.68   22.44
   2   3 -12  229.70   23.74
   2  -3 -12  250.70   23.28
  -2  -3  12  210.79   22.06
  -2  -3  12  269.07   20.80
   2  -3 -12  259.29   22.29
   2   3 -12  246.31   21.83
   2  -3 -12  247.04   22.06
   2   3 -12  205.78   21.76
   2  -3 -12  232.53   20.70
   2  -3 -12  219.13   23.71
   2   3 -12  274.32   24.18
   2   3 -12  238.86   23.94
   2  -3 -12  273.12   24.95
  -2  -3  11    5.58    2.62
   2   3 -11    2.52    2.39
   2   3 -11    3.28    2.24
   2  -3 -11    1.43    1.79
  -2  -3  11    3.59    1.74
   2   3 -11    4.81    2.87
   2  -3 -11    0.53    2.73
   2  -3 -11    6.32    2.68
   2   3 -11    5.51    2.70
   2  -3 -11    4.16    1.80
   2  -3 -11    1.84    3.01
   2  -3 -11    2.94    3.45
   2   3 -11    4.49    3.59
   2   3 -11    8.37    4.02
  -2  -3  10  279.45   26.21
   2   3 -10  281.10   27.00
   2  -3 -10  334.86   26.84
   2   3 -10  286.56   26.40
  -2  -3  10  274.86   24.30
   2  -3 -10  288.50   25.55
   2  -3 -10  293.68   24.64
   2  -3 -10  277.74   25.60
   2   3 -10  286.68   25.46
   2  -3 -10  371.94   28.48
   2   3 -10  337.08   28.05
   2   3 -10  293.92   27.20
   2  -3 -10  337.66   28.37
   2  -3  -9    7.74    1.96
  -2  -3   9    6.14    3.01
   2   3  -9    1.35    2.34
   2   3  -9   10.34    3.32
   2  -3  -9    3.84    2.12
   2   3  -9   12.61    3.98
   2  -3  -9   10.31    4.18
   2   3  -9    8.28    3.50
   2  -3  -9    9.74    3.82
  -2  -3   8  420.60   38.38
   2  -3  -8  476.57   38.45
   2   3  -8  443.27   38.83
   2  -3  -8  444.15   39.43
   2  -3  -8  526.27   39.89
   2   3  -8  470.61   39.25
   2   3  -8  442.94   39.34
   2  -3  -7   35.60    4.58
  -2  -3   7   30.63    4.94
   2   3  -7   29.06    5.06
   2  -3  -7   28.43    5.43
   2   3  -7   27.83    5.47
   2  -3  -7   35.61    5.64
   2   3  -7   25.40    5.06
   2  -3  -6  174.25   14.52
   2   3  -6  140.02   15.06
   2   3  -6  127.82   14.94
   2  -3  -6  180.12   15.54
   2   3  -6  163.78   15.27
   2  -3  -6  185.41   15.84
   2  -3  -5  150.41   12.74
   2   3  -5  120.72   13.40
   2   3  -5  157.86   14.62
   2  -3  -5  154.54   14.34
   2  -3  -5  148.35   13.62
   2  -3  -5  169.31   13.95
   2   3  -5  136.87   13.61
   2   3  -5  117.07   13.20
   2   3  -4    8.61    2.83
  -2  -3   4    9.66    3.23
   2  -3  -4   13.49    2.14
   2  -3  -4    9.72    2.83
   2   3  -4    5.87    2.67
   2  -3  -4    8.42    3.79
   2   3  -4    8.26    3.76
   2  -3  -4   12.06    2.96
   2   3  -4    9.93    2.92
  -2  -3   3  136.74   11.96
   2  -3  -3  125.85   10.62
   2   3  -3  102.08   11.58
   2   3  -3  109.27   11.57
   2  -3  -3  126.43   11.72
   2  -3  -3  128.01   12.14
   2   3  -3  129.42   11.79
   2  -3  -3  128.21   11.67
   2   3  -3  137.74   12.58
  -2  -3   2  287.11   24.54
  -2   3   2  286.00   23.01
   2  -3  -2  301.41   24.87
   2   3  -2  307.97   25.08
   2  -3  -2  283.55   24.44
   2   3  -2  292.94   24.60
   2   3  -2  295.55   24.64
   2  -3  -2  294.07   24.51
  -2  -3   1 1134.18   92.21
  -2   3   1 1150.60   91.39
   2  -3  -1 1238.37   92.78
   2   3  -1 1127.62   92.65
   2   3  -1 1235.48   92.60
   2   3  -1 1191.17   92.56
   2   3  -1 1233.55   92.87
   2  -3  -1 1120.55   92.52
   2  -3  -1 1148.18   92.41
   2   3  -1 1126.29   92.72
   2  -3  -1 1174.78   92.77
   2  -3  -1 1137.17   92.34
  -2  -3   0 1285.40  100.89
   2  -3   0 1310.50  101.47
   2   3   0 1255.00  101.45
   2   3   0 1262.11  101.21
   2  -3   0 1331.43  101.66
   2   3   0 1284.87  101.68
   2   3   0 1266.36  101.58
   2  -3   0 1308.56  101.70
   2  -3   0 1219.07  101.13
  -2  -3  -1  179.40   15.18
   2   3   1  190.34   16.32
   2  -3   1  180.77   16.19
   2   3   1  162.82   15.60
   2  -3   1  177.41   15.94
   2   3   1  181.57   15.95
   2   3   1  204.33   16.59
   2  -3   1  165.79   16.21
   2  -3   1  189.09   15.84
  -2  -3  -2  125.82   11.24
   2   3   2  124.61   12.52
   2  -3   2  140.00   12.45
   2   3   2  129.79   12.01
   2  -3   2  143.98   12.21
   2   3   2  126.58   12.17
   2  -3   2  136.40   12.76
   2  -3   2  153.95   12.95
   2   3   2  132.85   12.57
  -2   3  -3  473.68   40.22
  -2  -3  -3  447.04   40.13
   2  -3   3  513.58   42.18
   2   3   3  526.89   42.16
   2  -3   3  547.75   41.77
   2   3   3  556.15   41.62
   2   3   3  579.37   42.20
   2   3   3  542.62   41.41
   2  -3   3  543.18   41.55
   2   3   3  539.16   42.18
   2  -3   3  536.11   42.32
   2  -3   3  575.90   42.42
  -2   3  -4  134.90   11.15
  -2   3  -4  116.37   10.02
  -2  -3  -4   98.65    9.28
   2  -3   4  125.78   11.85
   2   3   4  123.64   11.65
   2   3   4  123.12   11.56
   2  -3   4  142.54   12.29
   2   3   4  135.76   11.68
   2  -3   4  127.81   11.75
  -2   3  -5  173.02   14.61
  -2   3  -5  154.08   13.64
   2  -3   5  157.73   15.28
  -2  -3  -5  149.45   14.08
   2   3   5  161.85   15.12
   2  -3   5  155.93   15.29
   2   3   5  165.69   15.05
   2   3   5  127.19   14.48
   2  -3   5  157.87   15.30
   2  -3   5  170.01   15.35
  -2   3  -6  168.33   15.18
   2  -3   6  176.49   16.26
  -2   3  -6  165.56   14.54
  -2  -3  -6  158.29   14.77
   2   3   6  157.09   15.75
   2  -3   6  147.77   15.92
   2  -3   6  180.39   16.56
   2   3   6  158.79   15.65
   2   3   6  161.30   15.86
   2  -3   6  151.72   15.94
  -2   3  -7  318.32   25.25
   2  -3   7  321.49   26.50
  -2   3  -7  270.82   24.37
  -2  -3  -7  290.02   24.79
   2   3   7  264.14   25.77
   2  -3   7  289.37   26.54
   2   3   7  289.03   26.01
   2  -3   7  273.20   26.22
   2  -3   7  317.19   26.83
   2   3   7  270.55   25.80
   2   3   7  257.98   25.56
   2  -3   7  270.83   25.98
  -2   3  -8  523.95   42.77
  -2   3  -8  540.09   43.32
   2  -3   8  572.45   44.97
  -2  -3  -8  584.09   43.41
   2  -3   8  538.12   45.20
   2   3   8  502.02   44.43
   2  -3   8  470.58   44.52
   2   3   8  526.97   44.55
   2  -3   8  554.16   45.14
   2   3   8  506.87   44.33
   2   3   8  479.27   42.19
   2  -3   8  500.82   42.53
   2  -3   8  485.07   42.48
   2   3   8  497.70   44.40
   2  -3   8  533.85   45.29
   2   3   8  487.32   42.27
   2   3   9   10.55    3.06
   2  -3   9   17.25    5.47
   2   3   9    8.33    4.18
   2  -3   9    9.98    3.26
   2  -3   9    6.04    4.01
   2   3   9    9.20    3.98
   2  -3   9    3.89    3.66
   2   3   9    9.35    4.31
   2  -3   9   10.21    4.39
   2   3   9    9.80    4.20
   2  -3   9   14.50    2.73
   2  -3   9   16.29    2.81
   2  -3   9   10.82    4.08
   2  -3   9   12.82    3.40
   2   3   9   18.32    3.54
  -2   3  -9   11.15    3.42
  -2   3  -9   12.38    3.09
  -2  -3  -9   16.84    3.74
   2  -3  10   89.28   12.08
   2   3  10   81.41    9.26
   2   3  10   90.00   11.86
   2   3  10   84.14    9.12
   2  -3  10   64.77    9.16
   2  -3  10   79.97    9.31
   2  -3  10   92.00   12.34
   2   3  10   86.26   11.56
   2   3  10   77.93   11.28
   2  -3  10   82.64   11.67
   2   3  10   96.85   11.86
   2  -3  10   80.96   11.52
   2  -3  10  109.08    8.89
   2   3  10   84.83    8.11
   2  -3  10   76.75    8.08
   2  -3  10   86.03    9.46
   2   3  10   76.61    9.02
   2  -3  10   65.44    8.59
   2  -3  10   85.86    9.61
   2   3  10   94.04    9.56
  -2   3 -10   69.45    9.27
  -2  -3 -10   80.11    9.80
   2  -3  11   39.45    6.07
   2   3  11   40.19    5.97
   2  -3  11   36.72    7.95
   2   3  11   47.65    6.51
   2  -3  11   41.93    6.63
   2   3  11   42.80    8.10
   2  -3  11   28.88    7.34
   2   3  11   35.42    7.81
   2   3  11   43.17    8.38
   2  -3  11   36.64    8.02
   2  -3  11   43.33    8.26
   2   3  11   42.36    8.20
   2   3  11   43.35    4.94
   2  -3  11   35.90    4.70
   2  -3  11   43.62    5.32
   2  -3  11   39.45    5.07
   2  -3  11   36.25    5.89
   2   3  11   39.48    6.06
   2  -3  11   41.58    5.80
   2  -3  11   47.72    6.80
   2   3  11   30.45    5.77
  -2   3 -11   35.65    6.27
  -2  -3 -11   36.69    6.25
   2  -3  12  683.62   54.19
   2   3  12  691.46   53.68
   2  -3  12  656.50   53.73
   2   3  12  668.30   53.95
   2   3  12  698.20   57.89
   2  -3  12  694.17   58.15
   2   3  12  610.33   56.91
   2  -3  12  603.27   56.83
   2   3  12  596.28   56.79
   2  -3  12  629.85   57.35
   2   3  12  545.11   56.05
   2  -3  12  668.13   57.76
   2   3  12  717.55   52.02
   2  -3  12  586.20   51.72
   2  -3  12  659.12   52.19
   2  -3  12  646.73   53.67
   2   3  12  657.27   53.53
   2  -3  12  617.05   52.92
   2  -3  12  646.52   53.98
   2   3  12  538.71   53.18
  -2  -3 -12  681.05   54.22
  -2   3 -12  668.05   54.67
  -2   3 -12  566.51   54.41
  -2  -3 -12  707.09   55.07
   2  -3  13   25.83    5.48
   2  -3  13   26.87    7.32
   2  -3  13   34.84    6.38
   2   3  13   40.12    8.37
   2   3  13   30.19    6.14
   2   3  13   31.21    5.63
   2   3  13   37.64    8.22
   2  -3  13   40.85    8.41
   2  -3  13   24.18    6.88
   2   3  13   29.31    7.38
   2   3  13   36.51    4.40
   2  -3  13   42.06    5.05
   2  -3  13   26.52    4.18
   2  -3  13   34.21    6.21
   2   3  13   29.18    5.70
   2   3  13   28.42    5.37
   2  -3  13   25.99    4.98
   2  -3  13   36.64    6.26
   2   3  13   34.64    6.24
  -2   3 -13   25.99    5.45
  -2  -3 -13   27.46    5.23
  -2  -3 -13   31.77    6.12
   2  -3  14   49.81    9.30
   2   3  14   49.15    6.97
   2   3  14   36.79    8.35
   2   3  14   36.10    6.22
   2  -3  14   31.47    5.93
   2  -3  14   39.78    6.60
   2   3  14   49.10    9.13
   2  -3  14   40.64    8.53
   2   3  14   34.16    8.07
   2  -3  14   28.36    7.35
   2  -3  14   32.96    4.56
   2  -3  14   32.15    4.89
   2  -3  14   37.61    6.34
   2   3  14   38.03    6.34
   2  -3  14   26.85    5.12
   2   3  14   41.78    6.22
   2  -3  14   48.24    7.05
   2   3  14   37.37    6.32
  -2   3 -14   32.56    6.14
  -2  -3 -14   35.56    5.95
  -2  -3 -14   38.48    6.95
   2   3  15   16.76    3.20
   2  -3  15   16.04    2.92
   2  -3  15   12.51    4.33
   2   3  15   25.79    5.09
   2   3  15   16.30    4.24
   2  -3  15   11.78    3.50
   2  -3  15   22.65    5.05
   2   3  15   15.87    4.51
   2   3  15   24.57    4.88
   2  -3  15   20.46    4.86
   2  -3  15   24.78    4.81
   2   3  15   16.58    4.47
   2   3  16   25.21    3.67
   2   3  16   19.24    4.96
   2  -3  16   29.39    5.26
   2   3  16   30.95    5.18
   2  -3  16   27.30    4.56
   2  -3  16   24.76    5.23
   2   3  16   27.61    5.41
   2  -3  16   23.28    4.90
   2  -3  16   26.89    5.32
   2   3  16   31.14    5.23
   2   3  16   26.73    5.34
   2   3  17   64.60    6.73
   2   3  17   63.83    8.14
   2  -3  17   68.51    8.24
   2  -3  17   71.76    7.72
   2   3  17   71.89    8.08
   2   3  17   69.94    8.42
   2  -3  17   71.29    8.52
   2   3  17   82.33    8.58
   2  -3  17   66.95    8.10
   2  -3  17   72.28    8.63
   2   3  17   82.01    8.91
  -2   3 -18   47.96    5.25
   2  -3  18   51.59    5.52
   2   3  18   44.73    5.85
   2  -3  18   53.67    6.24
   2   3  18   46.44    6.12
   2   3  18   50.12    6.33
   2  -3  18   33.95    5.88
  -2  -3 -18   44.31    5.19
   2   3  18   58.71    6.36
   2  -3  18   52.49    6.16
   2  -3  18   57.40    6.39
   2   3  18   55.04    6.46
   2   3  19   39.47    4.81
   2   3  19   51.98    5.69
   2  -3  19   45.71    5.44
   2  -3  19   32.75    5.21
   2   3  19   51.69    5.84
  -2  -3 -19   41.45    4.78
   2  -3  19   48.09    5.45
   2   3  19   60.88    5.91
   2   3  19   59.77    5.73
   2  -3  19   53.91    5.73
   2   3  19   62.05    5.67
   2   3  20    2.69    1.19
   2   3  20   -0.37    1.14
   2  -3  20    1.04    1.14
   2  -3  20    0.19    1.11
  -2   3 -20    0.36    1.26
   2   3  20   -0.19    1.26
  -2  -3 -20    0.18    1.32
   2   4 -20    1.86    1.13
  -2   4  20    3.98    1.19
  -2   4  20    4.03    1.71
  -2  -4  20    5.18    1.89
   2   4 -20    2.53    1.82
   2  -4 -20    2.77    1.97
  -2  -4  20    4.17    1.71
  -2   4  20    3.42    1.46
  -2   4  20    1.82    1.56
  -2  -4  20    1.02    1.43
  -2   4  20    0.25    1.26
   2   4 -20    1.72    1.51
   2  -4 -20    1.81    1.58
  -2  -4  20    1.81    1.59
   2   4 -19    4.45    1.63
  -2  -4  19    5.84    2.04
  -2   4  19    6.83    1.65
  -2   4  19    2.98    1.95
   2  -4 -19    4.29    2.81
  -2  -4  19    2.42    1.98
   2   4 -19    5.58    2.50
   2  -4 -19    7.38    2.36
  -2   4  19    3.55    1.88
  -2  -4  19    5.95    2.18
  -2   4  19    4.36    1.34
  -2   4  19    3.33    2.04
  -2  -4  19    3.56    2.11
   2   4 -19    3.31    2.20
   2  -4 -19    5.77    2.51
  -2   4  18    3.24    1.59
  -2  -4  18    7.43    2.30
  -2  -4  18    4.21    1.25
   2   4 -18    7.32    2.24
   2   4 -18    5.13    2.75
   2  -4 -18    3.38    3.19
  -2   4  18    7.46    2.52
  -2  -4  18    5.68    2.38
   2  -4 -18    1.89    2.20
  -2   4  18    4.21    2.21
  -2   4  18    4.95    1.90
  -2  -4  18    5.01    2.40
   2  -4 -18    4.39    1.59
   2   4 -18    2.00    2.25
   2  -4 -18    1.77    2.52
  -2   4  17    4.32    1.88
  -2  -4  17    4.05    1.53
  -2  -4  17    9.84    2.55
  -2  -4  17    5.13    2.55
   2   4 -17    3.92    3.12
   2  -4 -17   11.11    4.00
  -2   4  17    7.55    2.80
   2  -4 -17    2.80    2.77
   2  -4 -17    7.49    1.98
  -2  -4  17    9.79    2.86
  -2   4  17    6.39    2.75
   2   4 -17    1.82    2.46
   2  -4 -17    4.57    3.01
  -2  -4  16   38.25    4.70
  -2   4  16   47.51    5.12
  -2  -4  16   45.55    5.45
  -2   4  16   46.16    5.73
   2  -4 -16   44.64    6.88
   2   4 -16   25.46    5.65
  -2  -4  16   43.65    5.57
   2  -4 -16   38.24    6.21
   2  -4 -16   39.38    4.94
  -2  -4  16   44.60    5.71
  -2   4  16   50.71    5.96
   2   4 -16   29.44    5.78
   2  -4 -16   36.87    6.15
   2  -4 -15   58.46   10.18
  -2  -4  15   74.93    9.81
  -2   4  15   50.50    8.68
   2  -4 -15   71.47   10.41
   2   4 -15   57.18    9.67
   2   4 -15   81.72   10.28
   2  -4 -15   67.48    9.35
  -2  -4  15   67.89    7.13
  -2  -4  15   60.96    7.33
   2  -4 -15   70.31    8.61
   2   4 -15   61.68    7.95
  -2   4  15   65.40    7.40
   2  -4 -15   53.64    7.86
   2  -4 -15   56.45    6.68
  -2   4  15   62.71    7.26
  -2  -4  15   78.61    7.81
  -2  -4  15   42.07    8.42
  -2   4  15   44.43    8.23
   2  -4 -15   73.63    8.29
   2   4 -15   57.29    7.43
  -2  -4  14    9.32    3.83
  -2   4  14    5.61    2.93
   2  -4 -14    9.00    3.96
   2   4 -14    5.92    3.35
   2  -4 -14    4.75    4.18
   2   4 -14   -1.05    2.97
   2  -4 -14    3.60    2.82
  -2  -4  14    4.97    2.23
   2   4 -14    3.86    3.03
  -2  -4  14    7.31    3.25
   2  -4 -14    4.41    3.56
   2  -4 -14    3.17    2.99
  -2  -4  14    3.18    2.19
   2  -4 -14    2.25    1.79
  -2   4  14    1.82    2.11
   2   4 -14    1.01    2.57
   2  -4 -14    1.71    2.70
  -2  -4  13  318.32   30.99
   2  -4 -13  345.34   32.25
  -2  -4  13  366.97   32.13
  -2  -4  13  389.07   29.85
   2   4 -13  327.15   30.60
   2  -4 -13  395.24   31.65
   2   4 -13  270.16   30.60
   2  -4 -13  359.59   31.24
   2  -4 -13  392.17   30.13
  -2   4  13  391.68   30.60
   2   4 -13  378.19   33.85
  -2   4  13  344.59   32.59
   2  -4 -13  365.91   33.77
   2   4 -13  371.23   33.23
   2  -4 -13  334.99   33.67
  -2  -4  12    4.94    2.68
   2   4 -12    0.75    2.36
   2  -4 -12    6.94    2.92
  -2  -4  12    2.81    2.49
   2   4 -12    3.79    2.56
  -2  -4  12    2.99    1.78
   2   4 -12    4.59    2.85
   2  -4 -12    6.41    3.56
   2  -4 -12    9.75    3.20
   2   4 -12    0.57    2.24
   2  -4 -12    5.86    2.12
   2  -4 -12    6.49    4.08
   2   4 -12    4.79    3.61
   2   4 -12    5.38    3.27
   2  -4 -12    4.09    3.05
  -2  -4  11  120.82   12.90
   2  -4 -11  142.44   13.67
   2   4 -11   98.44   12.93
  -2  -4  11  115.03   11.13
   2   4 -11  121.54   12.59
   2   4 -11  115.97   12.22
   2  -4 -11  133.40   12.96
   2   4 -11   96.04   12.33
   2  -4 -11  142.38   12.95
   2  -4 -11  153.14   11.97
   2  -4 -11  136.79   14.83
   2   4 -11  125.67   14.05
   2  -4 -11  124.88   14.88
   2   4 -11  142.03   14.77
  -2  -4  10  191.03   17.36
   2  -4 -10  207.86   17.71
   2   4 -10  158.56   17.45
  -2  -4  10  164.32   15.29
   2  -4 -10  185.67   16.74
   2  -4 -10  194.08   15.99
   2  -4 -10  178.16   16.83
   2   4 -10  147.90   16.17
   2  -4 -10  194.82   19.14
   2  -4 -10  189.34   18.73
   2   4 -10  209.47   18.66
   2   4 -10  195.55   18.62
   2  -4  -9  120.83   11.65
   2   4  -9  148.54   12.09
  -2  -4   9  140.57   13.20
   2  -4  -9  138.24   13.03
   2   4  -9  102.89   13.09
   2  -4  -9  146.86   14.39
   2   4  -9  119.07   13.53
   2  -4  -9  129.17   14.22
   2   4  -9  114.36   13.64
   2   4  -8  287.21   22.63
   2  -4  -8  248.04   22.33
   2   4  -8  296.92   24.89
   2  -4  -8  281.03   24.67
   2   4  -8  247.53   24.09
   2  -4  -8  263.93   24.62
  -2  -4   8  248.70   23.60
   2  -4  -8  277.65   23.51
   2   4  -8  283.32   24.71
   2   4  -7  251.84   23.97
   2   4  -7  264.12   24.30
   2  -4  -7  292.31   24.39
   2  -4  -7  276.41   24.35
  -2  -4   7  255.14   23.64
   2  -4  -7  277.24   23.27
   2   4  -7  275.52   24.57
   2  -4  -6  644.55   48.64
   2   4  -6  533.41   48.18
   2  -4  -6  591.64   47.84
   2   4  -6  544.26   47.52
   2   4  -6  481.74   47.41
   2  -4  -6  628.89   47.91
   2  -4  -6  642.28   46.92
   2   4  -6  536.07   48.05
   2   4  -5 1731.44  152.94
   2   4  -5 1795.09  153.60
   2   4  -5 1819.62  153.17
   2  -4  -5 2035.18  153.37
   2  -4  -5 2145.33  153.96
   2  -4  -5 2028.98  153.22
   2  -4  -5 2072.48  152.18
   2   4  -5 1796.66  153.53
   2  -4  -4  893.76   71.04
   2   4  -4  835.58   71.00
   2  -4  -4  888.50   70.96
   2  -4  -4  951.43   71.54
   2   4  -4  928.22   71.19
   2   4  -4  829.16   71.35
  -2  -4   4  868.29   71.03
   2  -4  -4  915.63   69.92
   2   4  -4  795.78   71.27
   2   4  -3  125.85   11.18
   2  -4  -3  118.84   10.93
   2  -4  -3  114.45   11.33
   2  -4  -3   99.58   10.62
   2   4  -3  115.82   10.89
   2   4  -3  129.26   11.72
  -2  -4   3  112.66   10.95
   2  -4  -3  109.78    9.65
   2   4  -3  106.55   11.14
   2   4  -2 2725.28  191.70
   2  -4  -2 2799.09  191.61
   2   4  -2 2925.54  192.18
   2   4  -2 3140.69  191.99
   2  -4  -2 2906.20  191.95
   2  -4  -2 2737.07  191.58
  -2  -4   2 2800.16  191.57
   2   4  -2 2689.80  192.23
  -2   4   2 2044.29  189.75
   2   4  -1 1601.65  125.64
   2  -4  -1 1594.17  125.52
   2  -4  -1 1631.20  125.76
   2   4  -1 1588.31  125.85
   2   4  -1 1615.10  125.99
   2  -4  -1 1813.62  126.22
   2   4  -1 1545.08  125.78
   2  -4  -1 1655.44  125.92
  -2  -4   1 1569.80  125.38
  -2   4   1 1505.42  124.49
   2  -4   0  854.06   68.71
   2  -4   0  885.20   68.98
   2   4   0  906.67   68.88
   2  -4   0  801.42   68.98
   2   4   0  844.24   69.31
   2  -4   0  852.85   69.15
   2   4   0  882.49   69.15
   2   4   0  880.31   68.98
  -2  -4   0  853.14   68.43
  -2   4   0  856.11   68.04
   2   4   1  136.44   12.62
   2   4   1  156.19   12.59
   2  -4   1  150.31   12.61
   2  -4   1  149.19   13.10
   2  -4   1  120.40   12.51
   2   4   1  129.96   12.83
   2  -4   1  143.49   13.15
   2   4   1  138.95   12.98
  -2  -4  -1  136.82   12.00
  -2   4  -1  132.04   11.99
   2  -4   2 1237.64  105.44
   2   4   2 1374.25  104.89
   2  -4   2 1316.23  105.05
   2   4   2 1436.42  105.73
   2  -4   2 1360.43  105.78
   2  -4   2 1401.49  105.19
   2   4   2 1426.71  105.62
   2   4   2 1265.94  104.90
  -2   4  -2 1328.42  104.69
  -2  -4  -2 1236.70  104.11
   2   4   3  204.69   16.35
   2  -4   3  214.98   16.71
   2   4   3  163.31   16.45
   2  -4   3  187.36   16.98
   2  -4   3  199.44   17.08
   2   4   3  185.66   16.65
   2  -4   3  187.87   16.98
  -2   4  -3  192.29   16.14
  -2  -4  -3  163.89   15.06
   2   4   4    0.95    2.14
   2  -4   4    1.60    2.06
   2  -4   4   -2.57    2.69
   2   4   4    2.73    2.34
   2   4   4    3.32    2.32
   2  -4   4    2.12    2.49
  -2  -4  -4    0.99    0.81
  -2   4  -4    3.20    1.98
  -2   4  -4    1.89    1.13
   2  -4   5    3.59    2.63
   2  -4   5    4.02    2.64
   2   4   5    1.01    2.13
   2   4   5   -0.53    2.22
   2   4   5   -0.53    2.17
   2  -4   5   -1.19    2.37
  -2   4  -5   -0.40    1.93
  -2   4  -5   -0.27    1.14
   2  -4   6  417.45   34.07
   2   4   6  395.54   33.27
   2  -4   6  383.01   33.80
   2   4   6  353.81   33.04
  -2   4  -6  356.05   32.38
  -2   4  -6  380.63   31.98
  -2  -4  -6  390.60   32.51
   2  -4   6  445.69   34.29
   2   4   6  398.00   33.49
   2  -4   6  361.63   33.72
   2  -4   7    9.92    3.89
   2   4   7    3.46    3.22
   2  -4   7    9.45    3.87
   2  -4   7    7.56    3.92
   2   4   7    2.65    2.95
  -2   4  -7    8.15    2.83
  -2   4  -7    6.89    2.44
  -2  -4  -7    4.92    2.31
   2  -4   7    4.72    3.34
   2   4   7    6.90    3.21
  -2   4  -8   29.12    4.85
  -2   4  -8   20.80    4.11
  -2  -4  -8   32.02    4.93
   2   4   8   27.51    5.59
   2  -4   8   22.47    5.82
   2   4   8   28.76    5.61
   2  -4   8   20.90    5.56
   2  -4   8   21.72    5.59
   2  -4   8   27.71    6.19
   2  -4   8   19.40    4.07
   2   4   8   31.03    4.35
   2   4   8   28.42    4.26
   2  -4   8   23.99    4.24
   2   4   8   29.41    5.78
   2  -4   8   20.90    5.81
   2  -4   9    7.11    2.82
   2   4   9    2.52    2.17
   2   4   9    8.47    2.87
   2  -4   9    4.79    2.73
   2   4   9    2.73    3.12
   2  -4   9    1.04    3.11
   2  -4   9   11.86    4.38
   2  -4   9    9.22    4.33
   2   4   9    3.67    3.58
   2  -4   9    6.21    3.53
   2   4   9    5.27    3.62
   2  -4   9    5.24    2.09
   2  -4   9    7.64    2.18
   2   4   9    6.80    2.63
   2  -4   9    6.29    2.84
   2  -4   9    6.79    3.78
   2  -4   9    2.62    2.40
   2   4   9    7.86    2.61
  -2   4  -9    5.08    2.57
  -2   4  -9    6.48    2.39
  -2  -4  -9    9.29    3.00
   2   4  10  148.04   13.40
   2  -4  10  135.94   13.59
   2   4  10  125.14   15.32
   2  -4  10  137.56   16.31
   2  -4  10  133.94   13.30
   2   4  10  132.49   12.93
   2   4  10  136.66   15.70
   2  -4  10  110.80   15.25
   2  -4  10  137.76   16.02
   2   4  10  131.75   15.46
   2  -4  10  161.39   16.98
   2   4  10  132.23   11.86
   2  -4  10  122.76   11.94
   2  -4  10  138.16   12.40
   2  -4  10  130.84   12.04
   2   4  10  126.99   12.86
   2  -4  10  134.66   13.33
   2  -4  10  125.35   12.81
   2  -4  10  134.55   13.50
   2   4  10  130.98   13.04
  -2   4 -10  147.46   14.27
  -2   4 -10  100.14   13.01
   2  -4  10  126.10   15.41
  -2  -4 -10  142.29   14.02
   2  -4  11   14.78    4.04
   2   4  11   17.94    4.15
   2   4  11   20.14    4.34
   2  -4  11    7.56    4.75
   2  -4  11    9.61    3.62
   2   4  11   18.48    5.77
   2  -4  11   16.80    5.54
   2  -4  11   11.24    5.12
   2   4  11   11.66    5.17
   2  -4  11   13.83    5.42
   2   4  11   16.73    5.77
   2   4  11   19.13    2.96
   2  -4  11   16.95    3.08
   2  -4  11   14.09    3.06
   2   4  11   17.56    4.09
   2  -4  11   27.33    4.89
   2  -4  11   14.42    3.58
   2  -4  11   14.55    4.08
   2   4  11   17.50    4.10
  -2  -4 -11   12.88    3.90
   2   4  12  803.82   67.85
   2  -4  12  826.94   68.11
   2  -4  12  850.86   68.63
   2   4  12  866.02   68.49
   2   4  12  797.39   71.51
   2  -4  12  773.73   71.68
   2   4  12  771.16   71.37
   2  -4  12  828.06   72.19
   2  -4  12  749.51   71.13
   2   4  12  778.48   71.16
   2  -4  12  775.81   66.57
   2  -4  12  926.94   66.98
   2   4  12  835.05   68.04
   2  -4  12  792.44   68.07
   2  -4  12  820.48   67.60
   2  -4  12  912.64   68.88
   2   4  12  858.88   68.51
  -2   4 -12  813.37   69.21
  -2  -4 -12  890.05   69.31
  -2  -4 -12  850.45   69.41
   2   4  13    1.29    3.87
   2   4  13    1.35    4.41
   2  -4  13    2.75    4.11
   2  -4  13    9.20    4.48
  -2   4 -13    5.08    2.79
  -2  -4 -13    7.81    2.79
  -2  -4 -13    4.39    3.01
   2  -4  13   10.87    2.83
   2  -4  13    5.19    2.16
   2  -4  13    6.33    3.01
   2   4  13    4.29    2.86
   2  -4  13    6.79    2.94
   2  -4  13   10.37    3.59
   2   4  13    8.70    3.42
   2  -4  13    6.75    3.25
   2   4  13    2.68    3.80
   2   4  13    6.78    3.40
   2  -4  13    8.31    3.60
   2   4  13    9.66    3.34
   2  -4  13    5.52    4.70
   2  -4  14  478.38   40.33
   2  -4  14  478.06   40.71
   2   4  14  515.77   40.99
   2   4  14  496.48   40.46
   2   4  14  471.93   44.20
   2  -4  14  470.37   44.33
   2   4  14  425.09   43.58
   2  -4  14  412.93   43.58
   2  -4  14  438.28   43.64
   2   4  14  450.34   43.69
   2  -4  14  420.97   38.54
   2   4  14  494.78   40.54
   2  -4  14  502.17   40.55
   2  -4  14  474.21   39.74
   2   4  14  486.25   40.33
   2  -4  14  488.85   40.77
   2   4  14  562.77   41.35
  -2  -4 -14  469.98   40.77
  -2  -4 -14  480.36   42.01
  -2   4 -14  443.95   41.35
   2  -4  15   44.30    5.70
   2   4  15   48.96    5.81
   2  -4  15   68.45    7.83
   2   4  15   52.33    7.40
   2  -4  15   53.82    6.73
   2   4  15   56.06    7.37
   2   4  15   52.86    7.84
   2  -4  15   46.13    7.22
   2   4  15   56.26    7.43
   2  -4  15   51.70    7.57
   2  -4  15   58.01    7.48
   2   4  15   65.88    8.08
   2   4  16    0.26    1.50
   2  -4  16    0.52    1.42
   2  -4  16    0.55    2.73
   2   4  16   -0.56    3.01
   2  -4  16   -0.42    1.95
   2   4  16   -1.58    2.96
   2  -4  16   -0.61    3.06
   2   4  16   -1.84    3.00
   2  -4  16   -1.79    2.62
   2   4  16    1.22    2.81
   2   4  16    2.17    3.02
   2  -4  16   -1.06    2.80
  -2   4 -17    1.22    1.55
   2   4  17    1.23    1.45
   2  -4  17    4.28    2.79
   2   4  17    0.49    2.51
   2   4  17    1.36    2.45
   2  -4  17    3.16    2.75
   2   4  17    3.77    3.00
   2  -4  17   -2.27    2.63
   2   4  17    0.53    2.47
   2   4  17   -0.47    2.57
   2  -4  17   -0.51    2.31
   2   4  18   33.93    4.84
  -2   4 -18   37.06    4.57
   2   4  18   47.17    5.66
   2  -4  18   44.33    5.65
   2   4  18   46.92    5.76
   2  -4  18   45.97    5.85
   2   4  18   47.80    5.91
  -2  -4 -18   41.92    4.90
   2  -4  18   54.35    5.79
   2   4  18   56.27    5.91
   2   4  18   55.91    6.04
   2  -4  18   39.67    5.64
   2   4  19    9.81    1.87
   2  -4  19    8.31    2.18
  -2   4 -19    3.07    2.11
  -2  -4 -19    1.98    2.02
   2   4  19    8.15    2.34
   2   4  19   11.28    2.38
   2  -4  19   14.86    2.57
   2   4  19   13.96    2.58
   2   4  19   11.39    2.47
   2  -4  19    9.55    2.23
  -2  -4 -19    7.16    1.69
   2  -4  19    4.05    2.00
   2   4  19   11.00    2.32
   2   4  20   48.99    4.82
   2   5 -20    0.17    0.81
  -2  -5  20   -0.76    1.33
  -2   5  20    0.68    0.86
   2  -5 -20    1.28    1.61
  -2  -5  20   -0.40    1.33
   2   5 -20   -0.41    1.46
   2  -5 -20   -0.46    1.73
  -2   5  20    1.12    1.25
   2  -5 -20    0.38    1.16
  -2  -5  20    0.45    1.10
  -2   5  20    0.19    1.19
  -2  -5  20   -0.57    1.18
   2   5 -20    0.62    1.19
   2  -5 -20    1.70    1.25
  -2  -5  19  109.54    5.50
   2   5 -19   96.97    5.13
  -2   5  19  106.57    4.53
  -2   5  19   94.85    5.39
   2  -5 -19   92.19    6.06
  -2  -5  19   81.07    5.18
   2   5 -19   77.68    5.43
   2  -5 -19   82.91    5.69
  -2  -5  19   74.24    5.11
  -2   5  19   82.39    5.17
  -2   5  19   71.09    4.03
  -2  -5  19   63.18    4.69
  -2   5  19   53.50    4.44
   2  -5 -19   74.24    5.21
   2   5 -19   40.95    4.09
  -2   5  18    9.25    1.96
   2   5 -18    9.03    2.27
[truncated: 753,846 more chars]
